# Supplementary material
Source: ML conference proceedings conference paper supplement (https://proceedings.neurips.cc/paper_files/paper/2022/hash/89379d5fc6eb34ff98488202fb52b9d0-Abstract.html)
Supplement: Supplementary file 1 [file 89379d5fc6eb34ff98488202fb52b9d0-Supplemental-Conference.zip]

Archive with 4,446 entries (3,946 files):
- supplementary_material/
- __MACOSX/._supplementary_material
- supplementary_material/.DS_Store
- __MACOSX/supplementary_material/._.DS_Store
- supplementary_material/code/
- __MACOSX/supplementary_material/._code
- supplementary_material/full_paper_with_appendix.pdf
- __MACOSX/supplementary_material/._full_paper_with_appendix.pdf
- supplementary_material/appendix.pdf
- __MACOSX/supplementary_material/._appendix.pdf
- supplementary_material/code/.DS_Store
- __MACOSX/supplementary_material/code/._.DS_Store
- supplementary_material/code/run_scripts_to_reproduce_experiments/
- __MACOSX/supplementary_material/code/._run_scripts_to_reproduce_experiments
- supplementary_material/code/README.md
- __MACOSX/supplementary_material/code/._README.md
- supplementary_material/code/simpler_tasks_data_gen/
- __MACOSX/supplementary_material/code/._simpler_tasks_data_gen
- supplementary_material/code/modified_t5x/
- __MACOSX/supplementary_material/code/._modified_t5x
- supplementary_material/code/.git/
- __MACOSX/supplementary_material/code/._.git
- supplementary_material/code/data/
- __MACOSX/supplementary_material/code/._data
- supplementary_material/code/modified_text-to-text-transfer-transformer/
- __MACOSX/supplementary_material/code/._modified_text-to-text-transfer-transformer
- supplementary_material/code/run_scripts_to_reproduce_experiments/training_scripts/
- __MACOSX/supplementary_material/code/run_scripts_to_reproduce_experiments/._training_scripts
- supplementary_material/code/run_scripts_to_reproduce_experiments/data_scripts/
- __MACOSX/supplementary_material/code/run_scripts_to_reproduce_experiments/._data_scripts
- supplementary_material/code/simpler_tasks_data_gen/bash_scripts/
- __MACOSX/supplementary_material/code/simpler_tasks_data_gen/._bash_scripts
- supplementary_material/code/simpler_tasks_data_gen/examples_basic.ipynb
- __MACOSX/supplementary_material/code/simpler_tasks_data_gen/._examples_basic.ipynb
- supplementary_material/code/simpler_tasks_data_gen/scratch_lime.ipynb
- __MACOSX/supplementary_material/code/simpler_tasks_data_gen/._scratch_lime.ipynb
- supplementary_material/code/simpler_tasks_data_gen/requirements.txt
- __MACOSX/supplementary_material/code/simpler_tasks_data_gen/._requirements.txt
- supplementary_material/code/simpler_tasks_data_gen/scratch.ipynb
- __MACOSX/supplementary_material/code/simpler_tasks_data_gen/._scratch.ipynb
- supplementary_material/code/simpler_tasks_data_gen/generate.py
- __MACOSX/supplementary_material/code/simpler_tasks_data_gen/._generate.py
- supplementary_material/code/simpler_tasks_data_gen/mbpp_token_examples.ipynb
- __MACOSX/supplementary_material/code/simpler_tasks_data_gen/._mbpp_token_examples.ipynb
- supplementary_material/code/simpler_tasks_data_gen/cfg_tasks/
- __MACOSX/supplementary_material/code/simpler_tasks_data_gen/._cfg_tasks
- supplementary_material/code/simpler_tasks_data_gen/summarization_tasks_datagen/
- __MACOSX/supplementary_material/code/simpler_tasks_data_gen/._summarization_tasks_datagen
- supplementary_material/code/simpler_tasks_data_gen/scratch_mbpp.ipynb
- __MACOSX/supplementary_material/code/simpler_tasks_data_gen/._scratch_mbpp.ipynb
- supplementary_material/code/simpler_tasks_data_gen/mbpp.jsonl
- __MACOSX/supplementary_material/code/simpler_tasks_data_gen/._mbpp.jsonl
- supplementary_material/code/simpler_tasks_data_gen/README.md
- __MACOSX/supplementary_material/code/simpler_tasks_data_gen/._README.md
- supplementary_material/code/simpler_tasks_data_gen/.gitignore
- __MACOSX/supplementary_material/code/simpler_tasks_data_gen/._.gitignore
- supplementary_material/code/simpler_tasks_data_gen/prototypical_tasks.py
- __MACOSX/supplementary_material/code/simpler_tasks_data_gen/._prototypical_tasks.py
- supplementary_material/code/simpler_tasks_data_gen/scratch_summarization.ipynb
- __MACOSX/supplementary_material/code/simpler_tasks_data_gen/._scratch_summarization.ipynb
- supplementary_material/code/simpler_tasks_data_gen/data_scripts/
- __MACOSX/supplementary_material/code/simpler_tasks_data_gen/._data_scripts
- supplementary_material/code/simpler_tasks_data_gen/lime_datagen/
- __MACOSX/supplementary_material/code/simpler_tasks_data_gen/._lime_datagen
- supplementary_material/code/simpler_tasks_data_gen/examples_mbpp.ipynb
- __MACOSX/supplementary_material/code/simpler_tasks_data_gen/._examples_mbpp.ipynb
- supplementary_material/code/simpler_tasks_data_gen/examples_summarization.ipynb
- __MACOSX/supplementary_material/code/simpler_tasks_data_gen/._examples_summarization.ipynb
- supplementary_material/code/simpler_tasks_data_gen/tasks_with_tokens.py
- __MACOSX/supplementary_material/code/simpler_tasks_data_gen/._tasks_with_tokens.py
- supplementary_material/code/simpler_tasks_data_gen/examples_lime.ipynb
- __MACOSX/supplementary_material/code/simpler_tasks_data_gen/._examples_lime.ipynb
- supplementary_material/code/simpler_tasks_data_gen/unary_tokens_examples.ipynb
- __MACOSX/supplementary_material/code/simpler_tasks_data_gen/._unary_tokens_examples.ipynb
- supplementary_material/code/simpler_tasks_data_gen/path_utils.py
- __MACOSX/supplementary_material/code/simpler_tasks_data_gen/._path_utils.py
- supplementary_material/code/simpler_tasks_data_gen/t5vocab_scratch.ipynb
- __MACOSX/supplementary_material/code/simpler_tasks_data_gen/._t5vocab_scratch.ipynb
- supplementary_material/code/modified_t5x/pytest.ini
- __MACOSX/supplementary_material/code/modified_t5x/._pytest.ini
- supplementary_material/code/modified_t5x/LICENSE
- __MACOSX/supplementary_material/code/modified_t5x/._LICENSE
- supplementary_material/code/modified_t5x/final_exps/
- __MACOSX/supplementary_material/code/modified_t5x/._final_exps
- supplementary_material/code/modified_t5x/bash_utils/
- __MACOSX/supplementary_material/code/modified_t5x/._bash_utils
- supplementary_material/code/modified_t5x/docs/
- __MACOSX/supplementary_material/code/modified_t5x/._docs
- supplementary_material/code/modified_t5x/README.md
- __MACOSX/supplementary_material/code/modified_t5x/._README.md
- supplementary_material/code/modified_t5x/setup.py
- __MACOSX/supplementary_material/code/modified_t5x/._setup.py
- supplementary_material/code/modified_t5x/.gitignore
- __MACOSX/supplementary_material/code/modified_t5x/._.gitignore
- supplementary_material/code/modified_t5x/CONTRIBUTING.md
- __MACOSX/supplementary_material/code/modified_t5x/._CONTRIBUTING.md
- supplementary_material/code/modified_t5x/extract_results/
- __MACOSX/supplementary_material/code/modified_t5x/._extract_results
- supplementary_material/code/modified_t5x/t5x/
- __MACOSX/supplementary_material/code/modified_t5x/._t5x
- supplementary_material/code/modified_t5x/path_utils.py
- __MACOSX/supplementary_material/code/modified_t5x/._path_utils.py
- supplementary_material/code/.git/config
- __MACOSX/supplementary_material/code/.git/._config
- supplementary_material/code/.git/objects/
- __MACOSX/supplementary_material/code/.git/._objects
- supplementary_material/code/.git/HEAD
- __MACOSX/supplementary_material/code/.git/._HEAD
- supplementary_material/code/.git/info/
- __MACOSX/supplementary_material/code/.git/._info
- supplementary_material/code/.git/logs/
- __MACOSX/supplementary_material/code/.git/._logs
- supplementary_material/code/.git/description
- __MACOSX/supplementary_material/code/.git/._description
- supplementary_material/code/.git/hooks/
- __MACOSX/supplementary_material/code/.git/._hooks
- supplementary_material/code/.git/refs/
- __MACOSX/supplementary_material/code/.git/._refs
- supplementary_material/code/.git/index
- __MACOSX/supplementary_material/code/.git/._index
- supplementary_material/code/.git/packed-refs
- __MACOSX/supplementary_material/code/.git/._packed-refs
- supplementary_material/code/data/generated_data/
- __MACOSX/supplementary_material/code/data/._generated_data
- supplementary_material/code/modified_text-to-text-transfer-transformer/pytest.ini
- __MACOSX/supplementary_material/code/modified_text-to-text-transfer-transformer/._pytest.ini
- supplementary_material/code/modified_text-to-text-transfer-transformer/LICENSE
- __MACOSX/supplementary_material/code/modified_text-to-text-transfer-transformer/._LICENSE
- supplementary_material/code/modified_text-to-text-transfer-transformer/requirements.txt
- __MACOSX/supplementary_material/code/modified_text-to-text-transfer-transformer/._requirements.txt
- supplementary_material/code/modified_text-to-text-transfer-transformer/dist/
- __MACOSX/supplementary_material/code/modified_text-to-text-transfer-transformer/._dist
- supplementary_material/code/modified_text-to-text-transfer-transformer/build_custom_datasets/
- __MACOSX/supplementary_material/code/modified_text-to-text-transfer-transformer/._build_custom_datasets
- supplementary_material/code/modified_text-to-text-transfer-transformer/t5/
- __MACOSX/supplementary_material/code/modified_text-to-text-transfer-transformer/._t5
- supplementary_material/code/modified_text-to-text-transfer-transformer/released_checkpoints.md
- __MACOSX/supplementary_material/code/modified_text-to-text-transfer-transformer/._released_checkpoints.md
- supplementary_material/code/modified_text-to-text-transfer-transformer/README.md
- __MACOSX/supplementary_material/code/modified_text-to-text-transfer-transformer/._README.md
- supplementary_material/code/modified_text-to-text-transfer-transformer/setup.py
- __MACOSX/supplementary_material/code/modified_text-to-text-transfer-transformer/._setup.py
- supplementary_material/code/modified_text-to-text-transfer-transformer/.gitignore
- __MACOSX/supplementary_material/code/modified_text-to-text-transfer-transformer/._.gitignore
- supplementary_material/code/modified_text-to-text-transfer-transformer/CONTRIBUTING.md
- __MACOSX/supplementary_material/code/modified_text-to-text-transfer-transformer/._CONTRIBUTING.md
- supplementary_material/code/modified_text-to-text-transfer-transformer/copy_all_data_to_gcs.py
- __MACOSX/supplementary_material/code/modified_text-to-text-transfer-transformer/._copy_all_data_to_gcs.py
- supplementary_material/code/modified_text-to-text-transfer-transformer/t5.egg-info/
- __MACOSX/supplementary_material/code/modified_text-to-text-transfer-transformer/._t5.egg-info
- supplementary_material/code/modified_text-to-text-transfer-transformer/build/
- __MACOSX/supplementary_material/code/modified_text-to-text-transfer-transformer/._build
- supplementary_material/code/modified_text-to-text-transfer-transformer/notebooks/
- __MACOSX/supplementary_material/code/modified_text-to-text-transfer-transformer/._notebooks
- supplementary_material/code/run_scripts_to_reproduce_experiments/training_scripts/finetuning/
- __MACOSX/supplementary_material/code/run_scripts_to_reproduce_experiments/training_scripts/._finetuning
- supplementary_material/code/run_scripts_to_reproduce_experiments/training_scripts/pretraining/
- __MACOSX/supplementary_material/code/run_scripts_to_reproduce_experiments/training_scripts/._pretraining
- supplementary_material/code/run_scripts_to_reproduce_experiments/data_scripts/get_all_pretraining_and_finetuning_data_from_gcs.sh
- __MACOSX/supplementary_material/code/run_scripts_to_reproduce_experiments/data_scripts/._get_all_pretraining_and_finetuning_data_from_gcs.sh
- supplementary_material/code/run_scripts_to_reproduce_experiments/data_scripts/generate_simpler_tasks_data.sh
- __MACOSX/supplementary_material/code/run_scripts_to_reproduce_experiments/data_scripts/._generate_simpler_tasks_data.sh
- supplementary_material/code/simpler_tasks_data_gen/bash_scripts/tmp.sh
- __MACOSX/supplementary_material/code/simpler_tasks_data_gen/bash_scripts/._tmp.sh
- supplementary_material/code/simpler_tasks_data_gen/cfg_tasks/scratch.ipynb
- __MACOSX/supplementary_material/code/simpler_tasks_data_gen/cfg_tasks/._scratch.ipynb
- supplementary_material/code/simpler_tasks_data_gen/cfg_tasks/timeout.py
- __MACOSX/supplementary_material/code/simpler_tasks_data_gen/cfg_tasks/._timeout.py
- supplementary_material/code/simpler_tasks_data_gen/cfg_tasks/scratch_2.ipynb
- __MACOSX/supplementary_material/code/simpler_tasks_data_gen/cfg_tasks/._scratch_2.ipynb
- supplementary_material/code/simpler_tasks_data_gen/cfg_tasks/generate_data_scripts/
- __MACOSX/supplementary_material/code/simpler_tasks_data_gen/cfg_tasks/._generate_data_scripts
- supplementary_material/code/simpler_tasks_data_gen/cfg_tasks/generate_cfg_task_data.py
- __MACOSX/supplementary_material/code/simpler_tasks_data_gen/cfg_tasks/._generate_cfg_task_data.py
- supplementary_material/code/simpler_tasks_data_gen/cfg_tasks/__IGNORE_generate_specific_depth.py
- __MACOSX/supplementary_material/code/simpler_tasks_data_gen/cfg_tasks/.___IGNORE_generate_specific_depth.py
- supplementary_material/code/simpler_tasks_data_gen/cfg_tasks/cfg_utils.py
- __MACOSX/supplementary_material/code/simpler_tasks_data_gen/cfg_tasks/._cfg_utils.py
- supplementary_material/code/simpler_tasks_data_gen/cfg_tasks/test_generate_cfg_task_data.py
- __MACOSX/supplementary_material/code/simpler_tasks_data_gen/cfg_tasks/._test_generate_cfg_task_data.py
- supplementary_material/code/simpler_tasks_data_gen/cfg_tasks/generate_specific_depth_sents_and_derivs.py
- __MACOSX/supplementary_material/code/simpler_tasks_data_gen/cfg_tasks/._generate_specific_depth_sents_and_derivs.py
- supplementary_material/code/simpler_tasks_data_gen/summarization_tasks_datagen/vocab.py
- __MACOSX/supplementary_material/code/simpler_tasks_data_gen/summarization_tasks_datagen/._vocab.py
- supplementary_material/code/simpler_tasks_data_gen/summarization_tasks_datagen/__init__.py
- __MACOSX/supplementary_material/code/simpler_tasks_data_gen/summarization_tasks_datagen/.___init__.py
- supplementary_material/code/simpler_tasks_data_gen/summarization_tasks_datagen/__pycache__/
- __MACOSX/supplementary_material/code/simpler_tasks_data_gen/summarization_tasks_datagen/.___pycache__
- supplementary_material/code/simpler_tasks_data_gen/summarization_tasks_datagen/steptasks.py
- __MACOSX/supplementary_material/code/simpler_tasks_data_gen/summarization_tasks_datagen/._steptasks.py
- supplementary_material/code/simpler_tasks_data_gen/summarization_tasks_datagen/ourtasks.py
- __MACOSX/supplementary_material/code/simpler_tasks_data_gen/summarization_tasks_datagen/._ourtasks.py
- supplementary_material/code/simpler_tasks_data_gen/summarization_tasks_datagen/base.py
- __MACOSX/supplementary_material/code/simpler_tasks_data_gen/summarization_tasks_datagen/._base.py
- supplementary_material/code/simpler_tasks_data_gen/data_scripts/100k_1_23_lime/
- __MACOSX/supplementary_material/code/simpler_tasks_data_gen/data_scripts/._100k_1_23_lime
- supplementary_material/code/simpler_tasks_data_gen/data_scripts/std_exps_1M_set_run1/
- __MACOSX/supplementary_material/code/simpler_tasks_data_gen/data_scripts/._std_exps_1M_set_run1
- supplementary_material/code/simpler_tasks_data_gen/data_scripts/std_exps_1M_copy_run4/
- __MACOSX/supplementary_material/code/simpler_tasks_data_gen/data_scripts/._std_exps_1M_copy_run4
- supplementary_material/code/simpler_tasks_data_gen/data_scripts/std_exps_1M_copy_run3/
- __MACOSX/supplementary_material/code/simpler_tasks_data_gen/data_scripts/._std_exps_1M_copy_run3
- supplementary_material/code/simpler_tasks_data_gen/data_scripts/11-29/
- __MACOSX/supplementary_material/code/simpler_tasks_data_gen/data_scripts/._11-29
- supplementary_material/code/simpler_tasks_data_gen/data_scripts/100k_1_23_unary/
- __MACOSX/supplementary_material/code/simpler_tasks_data_gen/data_scripts/._100k_1_23_unary
- supplementary_material/code/simpler_tasks_data_gen/data_scripts/copy_data_from_gcs_to_target_loc.sh
- __MACOSX/supplementary_material/code/simpler_tasks_data_gen/data_scripts/._copy_data_from_gcs_to_target_loc.sh
- supplementary_material/code/simpler_tasks_data_gen/data_scripts/std_exps_1M_copy_run2/
- __MACOSX/supplementary_material/code/simpler_tasks_data_gen/data_scripts/._std_exps_1M_copy_run2
- supplementary_material/code/simpler_tasks_data_gen/data_scripts/split_data_train_val.py
- __MACOSX/supplementary_material/code/simpler_tasks_data_gen/data_scripts/._split_data_train_val.py
- supplementary_material/code/simpler_tasks_data_gen/data_scripts/1M_1_23_unary/
- __MACOSX/supplementary_material/code/simpler_tasks_data_gen/data_scripts/._1M_1_23_unary
- supplementary_material/code/simpler_tasks_data_gen/data_scripts/1M_1_25_mbpp/
- __MACOSX/supplementary_material/code/simpler_tasks_data_gen/data_scripts/._1M_1_25_mbpp
- supplementary_material/code/simpler_tasks_data_gen/data_scripts/convert_to_flax_data.py
- __MACOSX/supplementary_material/code/simpler_tasks_data_gen/data_scripts/._convert_to_flax_data.py
- supplementary_material/code/simpler_tasks_data_gen/data_scripts/std_exps_1M_lime_run2/
- __MACOSX/supplementary_material/code/simpler_tasks_data_gen/data_scripts/._std_exps_1M_lime_run2
- supplementary_material/code/simpler_tasks_data_gen/data_scripts/std_exps_debug_set/
- __MACOSX/supplementary_material/code/simpler_tasks_data_gen/data_scripts/._std_exps_debug_set
- supplementary_material/code/simpler_tasks_data_gen/data_scripts/std_exps_1M_lime_run4/
- __MACOSX/supplementary_material/code/simpler_tasks_data_gen/data_scripts/._std_exps_1M_lime_run4
- supplementary_material/code/simpler_tasks_data_gen/data_scripts/1M_1_23_lime/
- __MACOSX/supplementary_material/code/simpler_tasks_data_gen/data_scripts/._1M_1_23_lime
- supplementary_material/code/simpler_tasks_data_gen/data_scripts/std_exps_1M_lime_run3/
- __MACOSX/supplementary_material/code/simpler_tasks_data_gen/data_scripts/._std_exps_1M_lime_run3
- supplementary_material/code/simpler_tasks_data_gen/data_scripts/split_all_data_train_val.py
- __MACOSX/supplementary_material/code/simpler_tasks_data_gen/data_scripts/._split_all_data_train_val.py
- supplementary_material/code/simpler_tasks_data_gen/data_scripts/print_token_data_lengths_stats.py
- __MACOSX/supplementary_material/code/simpler_tasks_data_gen/data_scripts/._print_token_data_lengths_stats.py
- supplementary_material/code/simpler_tasks_data_gen/data_scripts/std_exps_1M_set_run3/
- __MACOSX/supplementary_material/code/simpler_tasks_data_gen/data_scripts/._std_exps_1M_set_run3
- supplementary_material/code/simpler_tasks_data_gen/data_scripts/std_exps_1M_set_run4/
- __MACOSX/supplementary_material/code/simpler_tasks_data_gen/data_scripts/._std_exps_1M_set_run4
- supplementary_material/code/simpler_tasks_data_gen/data_scripts/std_exps_1M_set_run2/
- __MACOSX/supplementary_material/code/simpler_tasks_data_gen/data_scripts/._std_exps_1M_set_run2
- supplementary_material/code/simpler_tasks_data_gen/data_scripts/1mil_1-11_t5_token_basic_unary_tasks/
- __MACOSX/supplementary_material/code/simpler_tasks_data_gen/data_scripts/._1mil_1-11_t5_token_basic_unary_tasks
- supplementary_material/code/simpler_tasks_data_gen/data_scripts/1-4/
- __MACOSX/supplementary_material/code/simpler_tasks_data_gen/data_scripts/._1-4
- supplementary_material/code/simpler_tasks_data_gen/data_scripts/std_exps_1M_copy_run1/
- __MACOSX/supplementary_material/code/simpler_tasks_data_gen/data_scripts/._std_exps_1M_copy_run1
- supplementary_material/code/simpler_tasks_data_gen/data_scripts/1M_1_25_binary/
- __MACOSX/supplementary_material/code/simpler_tasks_data_gen/data_scripts/._1M_1_25_binary
- supplementary_material/code/simpler_tasks_data_gen/data_scripts/save_data_to_gcs.sh
- __MACOSX/supplementary_material/code/simpler_tasks_data_gen/data_scripts/._save_data_to_gcs.sh
- supplementary_material/code/simpler_tasks_data_gen/data_scripts/std_exps_1M_lime_run1/
- __MACOSX/supplementary_material/code/simpler_tasks_data_gen/data_scripts/._std_exps_1M_lime_run1
- supplementary_material/code/simpler_tasks_data_gen/data_scripts/copy_ablations/
- __MACOSX/supplementary_material/code/simpler_tasks_data_gen/data_scripts/._copy_ablations
- supplementary_material/code/simpler_tasks_data_gen/data_scripts/1-11_t5_token_basic_unary_tasks/
- __MACOSX/supplementary_material/code/simpler_tasks_data_gen/data_scripts/._1-11_t5_token_basic_unary_tasks
- supplementary_material/code/simpler_tasks_data_gen/data_scripts/get_data_from_gcs.sh
- __MACOSX/supplementary_material/code/simpler_tasks_data_gen/data_scripts/._get_data_from_gcs.sh
- supplementary_material/code/simpler_tasks_data_gen/lime_datagen/__pycache__/
- __MACOSX/supplementary_material/code/simpler_tasks_data_gen/lime_datagen/.___pycache__
- supplementary_material/code/simpler_tasks_data_gen/lime_datagen/generate_data.py
- __MACOSX/supplementary_material/code/simpler_tasks_data_gen/lime_datagen/._generate_data.py
- supplementary_material/code/simpler_tasks_data_gen/lime_datagen/generate.sh
- __MACOSX/supplementary_material/code/simpler_tasks_data_gen/lime_datagen/._generate.sh
- supplementary_material/code/modified_t5x/final_exps/language_tasks/
- __MACOSX/supplementary_material/code/modified_t5x/final_exps/._language_tasks
- supplementary_material/code/modified_t5x/final_exps/mar25_copy_ablate_vocab/
- __MACOSX/supplementary_material/code/modified_t5x/final_exps/._mar25_copy_ablate_vocab
- supplementary_material/code/modified_t5x/final_exps/mar21_copy_length/
- __MACOSX/supplementary_material/code/modified_t5x/final_exps/._mar21_copy_length
- supplementary_material/code/modified_t5x/final_exps/nonlanguage_tasks/
- __MACOSX/supplementary_material/code/modified_t5x/final_exps/._nonlanguage_tasks
- supplementary_material/code/modified_t5x/final_exps/final_exps_utils/
- __MACOSX/supplementary_material/code/modified_t5x/final_exps/._final_exps_utils
- supplementary_material/code/modified_t5x/final_exps/mar21_cfg/
- __MACOSX/supplementary_material/code/modified_t5x/final_exps/._mar21_cfg
- supplementary_material/code/modified_t5x/final_exps/mar20_cfg/
- __MACOSX/supplementary_material/code/modified_t5x/final_exps/._mar20_cfg
- supplementary_material/code/modified_t5x/final_exps/runs/
- __MACOSX/supplementary_material/code/modified_t5x/final_exps/._runs
- supplementary_material/code/modified_t5x/final_exps/pretraining/
- __MACOSX/supplementary_material/code/modified_t5x/final_exps/._pretraining
- supplementary_material/code/modified_t5x/bash_utils/copy_finetune_no_inference.sh
- __MACOSX/supplementary_material/code/modified_t5x/bash_utils/._copy_finetune_no_inference.sh
- supplementary_material/code/modified_t5x/bash_utils/copy_pretrain.sh
- __MACOSX/supplementary_material/code/modified_t5x/bash_utils/._copy_pretrain.sh
- supplementary_material/code/modified_t5x/bash_utils/summ_copy_pretrain.sh
- __MACOSX/supplementary_material/code/modified_t5x/bash_utils/._summ_copy_pretrain.sh
- supplementary_material/code/modified_t5x/bash_utils/st_copy_pretrain.sh
- __MACOSX/supplementary_material/code/modified_t5x/bash_utils/._st_copy_pretrain.sh
- supplementary_material/code/modified_t5x/bash_utils/copy_pretrain_no_valid.sh
- __MACOSX/supplementary_material/code/modified_t5x/bash_utils/._copy_pretrain_no_valid.sh
- supplementary_material/code/modified_t5x/bash_utils/copy_finetune_no_predictions.sh
- __MACOSX/supplementary_material/code/modified_t5x/bash_utils/._copy_finetune_no_predictions.sh
- supplementary_material/code/modified_t5x/bash_utils/copy_finetune.sh
- __MACOSX/supplementary_material/code/modified_t5x/bash_utils/._copy_finetune.sh
- supplementary_material/code/modified_t5x/bash_utils/get_t5_base_offshelf_from_gcs.sh
- __MACOSX/supplementary_material/code/modified_t5x/bash_utils/._get_t5_base_offshelf_from_gcs.sh
- supplementary_material/code/modified_t5x/bash_utils/runs/
- __MACOSX/supplementary_material/code/modified_t5x/bash_utils/._runs
- supplementary_material/code/modified_t5x/bash_utils/tmp.sh
- __MACOSX/supplementary_material/code/modified_t5x/bash_utils/._tmp.sh
[truncated: 4,146 more entries]
