# Supplementary material
Source: ML conference proceedings conference paper supplement (https://proceedings.neurips.cc/paper_files/paper/2022/hash/89379d5fc6eb34ff98488202fb52b9d0-Abstract.html)
Supplement: Supplementary file 1 [file 89379d5fc6eb34ff98488202fb52b9d0-Supplemental-Conference.zip › supplementary_material/code/modified_t5x/bash_utils/get_t5_base_offshelf_from_gcs.sh]

gsutil -m cp -r gs://t5-data/pretrained_models/base/ \
/mnt/disks/persist/t5_training_models/CHECKPOINTS_FROM_GCS/
