# Supplementary material
Source: ML conference proceedings conference paper supplement (https://proceedings.neurips.cc/paper_files/paper/2022/hash/89379d5fc6eb34ff98488202fb52b9d0-Abstract.html)
Supplement: Supplementary file 1 [file 89379d5fc6eb34ff98488202fb52b9d0-Supplemental-Conference.zip › supplementary_material/code/modified_t5x/bash_utils/tmp.sh]

bash synthetic_tasks/1-15/squad/offshelf/no_freeze_adaf.sh 8 
bash synthetic_tasks/1-15/squad/ri/adaf.sh 8


bash synthetic_tasks/1-15/super_glue/offshelf/no_freeze_adaf.sh 8
bash synthetic_tasks/1-15/super_glue/ri/adaf.sh 8


bash synthetic_tasks/1-15/squad/load_freeze_embed_pretrain/finetune.sh 8
bash synthetic_tasks/1-15/squad/no_load_embed_pretrain/finetune.sh 8


bash synthetic_tasks/1-15/super_glue/load_freeze_embed_pretrain/finetune.sh 8
bash synthetic_tasks/1-15/super_glue/no_load_embed_pretrain/finetune.sh 8
