# Supplementary material
Source: ML conference proceedings conference paper supplement (https://proceedings.neurips.cc/paper_files/paper/2022/hash/89379d5fc6eb34ff98488202fb52b9d0-Abstract.html)
Supplement: Supplementary file 1 [file 89379d5fc6eb34ff98488202fb52b9d0-Supplemental-Conference.zip › supplementary_material/code/modified_t5x/docs/index.md]

# T5X


## Overview

T5X is a modular, composable, research-friendly framework for high-performance,
configurable, self-service training, evaluation, and inference of sequence
models (starting with language) at many scales.

It is essentially a new and improved implementation of the
[T5 codebase](https://github.com/google-research/text-to-text-transfer-transformer/blob/main/README.md) (based on Mesh TensorFlow) in JAX and Flax.

## Getting Started

Here are some quick tutorials to help you get started with common use-cases on
T5X:

#### [Fine-tuning a model](usage/finetune.md)

This tutorial outlines the steps to fine-tune an existing pre-trained model with
T5X on common downstream Tasks/Mixtures available on SeqIO. This is one of the
simplest and most common use cases of T5X. If you're new to T5X, this tutorial
is the recommended starting point.

#### [Running evaluation on a model](usage/eval.md)

This tutorial outlines the steps to evaluate a model with T5X on downstream
Tasks/Mixtures defined in SeqIO.

#### [Running inference on a model](usage/infer.md)

This tutorial outlines the steps to run inference on a model with T5X.

#### [Training a model from scratch](usage/pretrain.md)

This tutorial outlines the steps to pretrain a model with T5X on Tasks/Mixtures
defined in SeqIO.

#### [Gin Primer](usage/gin.md)

This tutorial provides a quick introduction to Gin, a lightweight configuration
framework for Python that is used to configure training, eval and inference jobs
on T5X.

#### [Partitioning Primer](usage/partitioning.md)

This tutorial provides background on what model and data partitioning are and
how it can be configured in T5X.

#### [Metrics Overview](usage/metrics.md)

This tutorial provides an overview of how metrics can be used and customized to
evaluate T5X models.
