# Supplementary material
Source: ML conference proceedings conference paper supplement (https://proceedings.neurips.cc/paper_files/paper/2022/hash/89379d5fc6eb34ff98488202fb52b9d0-Abstract.html)
Supplement: Supplementary file 1 [file 89379d5fc6eb34ff98488202fb52b9d0-Supplemental-Conference.zip › supplementary_material/code/modified_t5x/path_utils.py]

import pathlib


def parent_dir(path):
  path = pathlib.Path(path) 
  parent_dir = str(path.parent)
  if 'gs:/' in parent_dir and 'gs://' not in parent_dir:
    return parent_dir.replace('gs:/', 'gs://')
  else:
    return parent_dir
