# Supplementary material
Source: ML conference proceedings conference paper supplement (https://proceedings.neurips.cc/paper_files/paper/2022/hash/89379d5fc6eb34ff98488202fb52b9d0-Abstract.html)
Supplement: Supplementary file 1 [file 89379d5fc6eb34ff98488202fb52b9d0-Supplemental-Conference.zip › supplementary_material/code/modified_t5x/t5x/decoding_test.py]

# Copyright 2022 The T5X Authors.
#
# Licensed under the Apache License, Version 2.0 (the "License");
# you may not use this file except in compliance with the License.
# You may obtain a copy of the License at
#
#     http://www.apache.org/licenses/LICENSE-2.0
#
# Unless required by applicable law or agreed to in writing, software
# distributed under the License is distributed on an "AS IS" BASIS,
# WITHOUT WARRANTIES OR CONDITIONS OF ANY KIND, either express or implied.
# See the License for the specific language governing permissions and
# limitations under the License.

"""Tests for t5x.decoding."""

import functools
from typing import Mapping, Tuple
from unittest import mock

from absl.testing import absltest
from absl.testing import parameterized
import jax
from jax._src import api
from jax.experimental import host_callback as hcb
import jax.numpy as jnp
import numpy as np
from t5x import decoding

EOS_ID = 1
NEG_INF = decoding.NEG_INF


class DecodeTest(parameterized.TestCase):

  def test_temperature_sample_uneven_prefix(self):

    def token_to_logits(ids, cache):
      del ids
      del cache
      # Always sample id 2 for batch element 0 and id 3 for element 1.
      logits = np.array([[-1e7, -1e7, 0, -1e7], [-1e7, -1e7, -1e7, 0]],
                        dtype=np.float32)
      return logits, {}

    inputs = np.array([[0, 5, 7, 1, 0, 0], [0, 6, 1, 0, 0, 0]])
    sampled_sequences, _ = decoding._temperature_sample_single_trial(
        inputs, {},
        token_to_logits,
        EOS_ID,
        jax.random.PRNGKey(0),
        topk=0,
        initial_index=np.array([3, 2]))
    expected = np.array([[5, 7, 1, 2, 2, 2], [6, 1, 3, 3, 3, 3]])
    np.testing.assert_array_equal(expected, sampled_sequences)

  def test_temperature_sample_no_prefix(self):
    batch, max_decode_len = 2, 3

    def token_to_logits(ids, cache):  # pylint: disable=unused-argument
      # Always sample id 2 for batch element 0 and id 3 for element 1.
      logits = np.array([[-1e7, -1e7, 0, -1e7], [-1e7, -1e7, -1e7, 0]],
                        dtype=np.float32)
      return logits, {}

    inputs = np.zeros((batch, max_decode_len), dtype=np.int32)
    sampled_sequences, _ = decoding._temperature_sample_single_trial(
        inputs, {}, token_to_logits, EOS_ID, jax.random.PRNGKey(0), topk=0)

    expected = [[2, 2, 2], [3, 3, 3]]
    np.testing.assert_array_equal(expected, sampled_sequences)

  def test_temperature_sample_prefix(self):

    def token_to_logits(ids, cache):  # pylint: disable=unused-argument
      # Always sample id 2 for batch element 0 and id 3 for element 1.
      logits = np.array([[-1e7, -1e7, 0, -1e7], [-1e7, -1e7, -1e7, 0]],
                        dtype=np.float32)
      return logits, {}

    # batch element 0 has length 3 prefix and element 1 has length 2.
    inputs = np.array([[0, 5, 6, 7, 0], [0, 8, 9, 0, 0]], dtype=np.int32)
    sampled_sequences, _ = decoding._temperature_sample_single_trial(
        inputs, {}, token_to_logits, EOS_ID, jax.random.PRNGKey(0), topk=0)

    expected = [[5, 6, 7, 2, 2], [8, 9, 3, 3, 3]]
    np.testing.assert_array_equal(expected, sampled_sequences)

  def test_temperature_sample_with_zero_temperature(self):
    batch, max_decode_len = 2, 3

    def token_to_logits(ids, cache):  # pylint: disable=unused-argument
      # Use very large logits that are close to one another.
      logits = np.array(
          [[1700.47, 1700.48, 1700.51, 1700.45], [3.2, 4.8, -5.3, 5.6]],
          dtype=np.float32)
      return logits, {}

    inputs = np.zeros((batch, max_decode_len), dtype=np.int32)
    sampled_sequences, _ = decoding._temperature_sample_single_trial(
        inputs, {},
        token_to_logits,
        EOS_ID,
        jax.random.PRNGKey(0),
        topk=4,
        temperature=0.0)

    expected = [[2, 2, 2], [3, 3, 3]]
    np.testing.assert_array_equal(expected, sampled_sequences)

  def test_temperature_sample_prefix_ending_with_eos(self):

    def token_to_logits(ids, cache):  # pylint: disable=unused-argument
      # Always sample id 2 for batch element 0 and id 3 for element 1.
      logits = np.array([[-1e7, -1e7, 0, -1e7], [-1e7, -1e7, -1e7, 0]],
                        dtype=np.float32)
      return logits, {}

    # batch element 0 has length 4 prefix (including the initial dummy token and
    # the last eos) and element 1 has length 3.
    inputs = np.array([[0, 5, 6, 1, 0], [0, 8, 1, 0, 0]], dtype=np.int32)
    sampled_sequences, _ = decoding._temperature_sample_single_trial(
        inputs, {}, token_to_logits, EOS_ID, jax.random.PRNGKey(0), topk=1)

    expected = [[5, 6, 1, 2, 2], [8, 1, 3, 3, 3]]
    np.testing.assert_array_equal(expected, sampled_sequences)

  def test_temperature_sample_with_state_callback(self):

    def token_to_logits(ids, cache):  # pylint: disable=unused-argument
      # A distribution with roughly all probability mass in sample id 3
      logits = np.array([[-1e7, -1e7, -1e7, 0], [-1e7, -1e7, -1e7, 0]],
                        dtype=np.float32)
      return logits, {}

    def state_callback_fn(state):
      i, sequences, cache, cur_token, ended, rng, log_prob = state

      def callback_fn(current_index_and_sequences):
        """Add EOS token after first time token id 3 has been sampled."""
        current_index, sequences = current_index_and_sequences
        sequences = np.array(sequences)
        for i in range(len(current_index)):
          if sequences[i, current_index[i]] == 3:
            sequences[i, current_index[i] + 1] = EOS_ID
        return sequences

      sequences = hcb.call(
          callback_fn, (i, sequences),
          result_shape=api.ShapeDtypeStruct(sequences.shape, sequences.dtype))
      return i, sequences, cache, cur_token, ended, rng, log_prob

    inputs = np.array([[0, 5, 6, 7, 0], [0, 8, 9, 0, 0]], dtype=np.int32)
    sampled_sequences, _ = decoding._temperature_sample_single_trial(
        inputs, {},
        token_to_logits,
        EOS_ID,
        jax.random.PRNGKey(0),
        topk=0,
        temperature=0.0,
        state_callback_fn=state_callback_fn)

    expected = [[5, 6, 7, 3, EOS_ID], [8, 9, 3, EOS_ID, 0]]
    np.testing.assert_array_equal(expected, sampled_sequences)

  def test_temperature_sample_with_logit_callback(self):

    def token_to_logits(ids, cache):  # pylint: disable=unused-argument
      # uniform distribution over targets from model
      logits = np.array([[-1e7, -1e7, -1e7, -1e7], [-1e7, -1e7, -1e7, -1e7]],
                        dtype=np.float32)
      return logits, {}

    def logit_callback_fn(logits, state):
      del state  # unused
      # Rewrite logits to always sample id 2 for batch element 0 and
      # id 3 for element 1.
      logits[0, 2] = 0
      logits[1, 3] = 0
      return logits

    # batch element 0 has length 3 prefix and element 1 has length 2.
    inputs = np.array([[0, 5, 6, 7, 0], [0, 8, 9, 0, 0]], dtype=np.int32)
    sampled_sequences, _ = decoding._temperature_sample_single_trial(
        inputs, {},
        token_to_logits,
        EOS_ID,
        jax.random.PRNGKey(0),
        topk=0,
        temperature=0.0,
        logit_callback_fn=logit_callback_fn)

    expected = [[5, 6, 7, 2, 2], [8, 9, 3, 3, 3]]
    np.testing.assert_array_equal(expected, sampled_sequences)

  def test_temperature_sample_prefix_ending_with_eos_early_stop(self):
    batch, max_decode_len = 2, 7
    rng0 = jax.random.PRNGKey(0)

    ret = [np.array([2, 3]) for _ in range(max_decode_len)]
    # Sequence 1 outputs EOS=1 when i = 3 where `i` is the while loop counter of
    # `decoding._temperature_sample_single_trial`.
    ret[3] = np.array([2, 1])
    # Sequence 0 outputs EOS=1 when i = 4.
    ret[4] = np.array([1, 3])
    ret = jax.numpy.array(ret)

    def mocked_categorical(rng_input, logits):  # pylint: disable=unused-argument
      """Ignores logit and returns only based on the rng_input."""
      rng = rng0
      k = 0
      # Mimic the rng split done in `decoding.sample_loop_body_fn`.
      for j in range(max_decode_len):
        rng1, rng = jax.random.split(rng)
        # We want to sift out `j` for which rng1 == rng_input
        # rngs are a pair of ints. So sum the bool and divide by 2.
        k += j * (rng1 == rng_input).sum() // 2
      # `k` at this point is equal to the while loop variable `i` of the caller.
      return ret[k]

    def token_to_logits(ids, cache):  # pylint: disable=unused-argument
      # These values are not used in this test because random.categorical is
      # directly mocked.
      dummy_logits = np.zeros((batch, 4), dtype=np.float32)
      return dummy_logits, {}

    inputs = np.array([[0, 5, 1, 0, 0, 0, 0], [0, 8, 0, 0, 0, 0, 0]],
                      dtype=np.int32)
    with mock.patch.object(jax.random, 'categorical', new=mocked_categorical):
      sampled_sequences, _ = decoding._temperature_sample_single_trial(
          inputs, {}, token_to_logits, EOS_ID, rng0, topk=0)

    expected = [[5, 1, 2, 2, 1, 0, 0], [8, 3, 3, 1, 0, 0, 0]]
    np.testing.assert_array_equal(expected, sampled_sequences)

  def test_greedy_decoding_topk_sample_log_probs(self):

    def token_to_logits(ids, cache):  # pylint: disable=unused-argument
      # Sample [2, 3] with probability [0.6, 0.4].
      logits = np.array([[-1e7, -1e7, -0.510825624, -0.916290732]],
                        dtype=np.float32)
      return logits, {}

    inputs = np.array([[0, 2, 2, 2, 0]], dtype=np.int32)
    sampled_sequences, sampled_log_probs = decoding._temperature_sample_single_trial(
        inputs, {},
        token_to_logits,
        EOS_ID,
        jax.random.PRNGKey(0),
        topk=1,
        rescale_log_probs=True)

    expected_sequence = [[2, 2, 2, 2, 2]]
    expected_log_probs = [0.0]
    np.testing.assert_array_equal(expected_sequence, sampled_sequences)
    np.testing.assert_array_almost_equal(expected_log_probs, sampled_log_probs)

    inputs = np.array([[0, 2, 2, 3, 0]], dtype=np.int32)
    sampled_sequences, sampled_log_probs = decoding._temperature_sample_single_trial(
        inputs, {},
        token_to_logits,
        EOS_ID,
        jax.random.PRNGKey(0),
        topk=1,
        rescale_log_probs=False)

    expected_sequence = [[2, 2, 3, 2, 2]]
    expected_log_probs = [-1.02165125]
    np.testing.assert_array_equal(expected_sequence, sampled_sequences)
    np.testing.assert_array_almost_equal(expected_log_probs, sampled_log_probs)

  def test_temperature_sample_log_prob(self):
    batch, max_decode_len = 2, 7
    rng0 = jax.random.PRNGKey(0)

    ret = [np.array([2, 3]) for _ in range(max_decode_len)]
    # Sequence 1 outputs EOS=1 when i = 3 where `i` is the while loop counter of
    # `decoding._temperature_sample_single_trial`.
    ret[3] = np.array([2, 1])
    # Sequence 0 outputs EOS=1 when i = 4.
    ret[4] = np.array([1, 3])
    ret = jax.numpy.array(ret)

    # TODO(hwchung): refactor this.
    def mocked_categorical(rng_input, logits):  # pylint: disable=unused-argument
      """Ignores logit and returns only based on the rng_input."""
      rng = rng0
      k = 0
      # Mimic the rng split done in `decoding.sample_loop_body_fn`.
      for j in range(max_decode_len):
        rng1, rng = jax.random.split(rng)
        # We want to sift out `j` for which rng1 == rng_input
        # rngs are a pair of ints. So sum the bool and divide by 2.
        k += j * (rng1 == rng_input).sum() // 2
      # `k` at this point is equal to the while loop variable `i` of the caller.
      return ret[k]

    logits = np.random.randn(batch, 4)
    token_to_logits = lambda ids, cache: (logits, {})
    inputs = np.array([[0, 5, 1, 0, 0, 0, 0], [0, 8, 0, 0, 0, 0, 0]],
                      dtype=np.int32)
    with mock.patch.object(jax.random, 'categorical', new=mocked_categorical):
      sampled_sequences, log_prob = decoding._temperature_sample_single_trial(
          inputs, {}, token_to_logits, EOS_ID, rng0, topk=0)

    log_probs = jax.nn.log_softmax(logits)
    expected = [[5, 1, 2, 2, 1, 0, 0], [8, 3, 3, 1, 0, 0, 0]]
    expected_log_prob = [
        log_probs[0, 2] + log_probs[0, 2] + log_probs[0, 1],
        log_probs[1, 3] + log_probs[1, 3] + log_probs[1, 1]
    ]
    expected_log_prob = np.array(expected_log_prob)
    np.testing.assert_array_equal(expected, sampled_sequences)
    np.testing.assert_allclose(expected_log_prob, log_prob, atol=1e-5)

  def test_temperature_sample_num_decodes(self):
    num_decodes = 3
    rng0 = jax.random.PRNGKey(0)
    inputs = np.array([[0, 5, 1, 0], [0, 8, 7, 0]], dtype=np.int32)

    with mock.patch.object(decoding,
                           '_temperature_sample_single_trial') as mocked:
      # expanded_decodes: [batch * num_decodes, max_decode_len]
      expanded_decodes = np.array([[5, 1, 4, 4], [5, 1, 5, 5], [5, 1, 3, 3],
                                   [8, 7, 5, 5], [8, 7, 3, 3], [8, 7, 4, 4]])
      # expanded_log_prob: [batch * num_decodes]
      expanded_log_prob = np.array([-2.3, -1.3, -3.6, -0.5, -2.5, -1.9])
      mocked.return_value = expanded_decodes, expanded_log_prob

      decodes, scores = decoding.temperature_sample(
          inputs, {}, mock.Mock(), EOS_ID, rng0, num_decodes=num_decodes)

      expanded_inputs = jnp.array([[0, 5, 1, 0], [0, 5, 1, 0], [0, 5, 1, 0],
                                   [0, 8, 7, 0], [0, 8, 7, 0], [0, 8, 7, 0]])
      # Test that the actual decode function is called with the expanded values.
      np.testing.assert_array_equal(mocked.call_args[0][0], expanded_inputs)

    np.testing.assert_array_equal(decodes,
                                  [[[5, 1, 3, 3], [5, 1, 4, 4], [5, 1, 5, 5]],
                                   [[8, 7, 3, 3], [8, 7, 4, 4], [8, 7, 5, 5]]])
    np.testing.assert_allclose(scores, [[-3.6, -2.3, -1.3], [-2.5, -1.9, -0.5]])

  def test_temperature_sample_num_decodes_with_initial_index(self):
    num_decodes = 3
    rng0 = jax.random.PRNGKey(0)
    inputs = np.array([[0, 5, 1, 0], [0, 8, 7, 0]], dtype=np.int32)
    initial_index = np.array([1, 2], dtype=np.int32)

    with mock.patch.object(decoding,
                           '_temperature_sample_single_trial') as mocked:
      with mock.patch.object(decoding, 'cache_map') as mocked_cache_map:
        # expanded_decodes: [batch * num_decodes, max_decode_len]
        expanded_decodes = np.array([[5, 1, 4, 4], [5, 1, 5, 5], [5, 1, 3, 3],
                                     [8, 7, 5, 5], [8, 7, 3, 3], [8, 7, 4, 4]])
        # expanded_log_prob: [batch * num_decodes]
        expanded_log_prob = np.array([-2.3, -1.3, -3.6, -0.5, -2.5, -1.9])
        mocked.return_value = expanded_decodes, expanded_log_prob

        decodes, scores = decoding.temperature_sample(
            inputs, {},
            mock.Mock(),
            EOS_ID,
            rng0,
            num_decodes=num_decodes,
            initial_index=initial_index)

        expanded_inputs = jnp.array([[0, 5, 1, 0], [0, 5, 1, 0], [0, 5, 1, 0],
                                     [0, 8, 7, 0], [0, 8, 7, 0], [0, 8, 7, 0]])
        expanded_initial_index = np.array([1, 1, 1, 2, 2, 2], dtype=np.int32)
        # Test that the actual decode function is called with the expanded
        # values.
        np.testing.assert_array_equal(mocked.call_args[0][0], expanded_inputs)
        np.testing.assert_array_equal(mocked.call_args[1]['initial_index'],
                                      expanded_initial_index)
        # Test that the function was applied to the index in the cache map
        self.assertTrue(mocked_cache_map.call_args[1]['apply_to_index'])

    np.testing.assert_array_equal(decodes,
                                  [[[5, 1, 3, 3], [5, 1, 4, 4], [5, 1, 5, 5]],
                                   [[8, 7, 3, 3], [8, 7, 4, 4], [8, 7, 5, 5]]])
    np.testing.assert_allclose(scores, [[-3.6, -2.3, -1.3], [-2.5, -1.9, -0.5]])

  @parameterized.named_parameters(
      dict(
          testcase_name='no_initial_index',
          initial_index=None,
          expected_calls=6,
      ),
      dict(
          testcase_name='initial_index',
          initial_index=np.array([1, 2], dtype=np.int32),
          expected_calls=4,
      ),
      dict(
          testcase_name='lower_initial_index',
          initial_index=np.array([1, 1], dtype=np.int32),
          expected_calls=5,  # we decode 4 tokens out of the prompt
      ),
  )
  def test_temperature_sample_max_decode_steps_with_initial_index(
      self, initial_index, expected_calls):
    max_decode_steps = 4
    rng0 = jax.random.PRNGKey(0)
    inputs = np.array([[0, 2, 0, 0, 0, 0, 0, 0], [0, 2, 2, 0, 0, 0, 0, 0]],
                      dtype=np.int32)

    token_to_logits = mock.Mock()
    token_to_logits.return_value = (np.array(
        [[-1e7, -1e7, -1e7, 0], [-1e7, -1e7, -1e7, 0]], dtype=np.float32), {})

    # to unroll while loop
    with jax.disable_jit():
      decodes, scores = decoding.temperature_sample(
          inputs, {},
          token_to_logits,
          EOS_ID,
          rng0,
          initial_index=initial_index,
          topk=4,
          max_decode_steps=max_decode_steps)

    self.assertLen(token_to_logits.call_args_list, expected_calls)

    expected_output = np.array([[2, 3, 3, 3, 3, 0, 0, 0],
                                [2, 2, 3, 3, 3, 3, 0, 0]])
    expected_output = jnp.expand_dims(expected_output, 1)

    np.testing.assert_array_equal(decodes, expected_output)
    np.testing.assert_array_equal(scores, [[0.], [0.]])

  def test_temperature_sample_max_decode_steps_endpad(self):
    max_decode_steps = 4
    rng0 = jax.random.PRNGKey(0)
    inputs = np.array([[0, 2, 0, 0, 0, 0, 0, 0], [0, 2, 2, 2, 2, 2, 2, 0],
                       [0, 2, 2, 2, 0, 0, 0, 0]],
                      dtype=np.int32)
    initial_index = np.array([1, 6, 0])

    token_to_logits = mock.Mock()
    token_to_logits.return_value = (np.array(
        [[-1e7, -1e7, -1e7, 0], [-1e7, -1e7, -1e7, 0], [-1e7, -1e7, -1e7, 0]],
        dtype=np.float32), {})

    # to unroll while loop
    with jax.disable_jit():
      decodes, scores = decoding.temperature_sample(
          inputs, {},
          token_to_logits,
          EOS_ID,
          rng0,
          initial_index=initial_index,
          topk=4,
          max_decode_steps=max_decode_steps)

    # `inputs[2]` starts from index 0. So it requires 3 calls to
    # `token_to_logits` to exit the prompt (these generated tokens are
    # overridden) and 4 more calls to fill the rest. `inputs[0]` only need 4
    # calls. In the last 3 calls, it generates but MUST NOT populate the
    # sequences because it is already ended.
    self.assertLen(token_to_logits.call_args_list, 7)
    expected_output = np.array(
        [[2, 3, 3, 3, 3, 0, 0, 0], [2, 2, 2, 2, 2, 2, 3, 3],
         [2, 2, 2, 3, 3, 3, 3, 0]],
        dtype=np.int32)
    expected_output = jnp.expand_dims(expected_output, 1)

    np.testing.assert_array_equal(decodes, expected_output)
    np.testing.assert_allclose(scores, [[0.], [0.], [0.]])

  def test_temperature_sample_max_decode_steps_docstring_ex4(self):
    max_decode_steps = 2
    rng0 = jax.random.PRNGKey(0)
    inputs = np.array([[0, 2, 0, 0, 0, 0, 0, 0], [0, 3, 4, 0, 0, 0, 0, 0]],
                      dtype=np.int32)
    initial_index = np.array([1, 2])

    token_to_logits = mock.Mock()
    token_to_logits.return_value = (np.array(
        [[-1e7, -1e7, 0, -1e7], [-1e7, -1e7, -1e7, 0]], dtype=np.float32), {})

    # to unroll while loop
    with jax.disable_jit():
      decodes, _ = decoding.temperature_sample(
          inputs, {},
          token_to_logits,
          EOS_ID,
          rng0,
          initial_index=initial_index,
          topk=4,
          max_decode_steps=max_decode_steps)
    self.assertLen(token_to_logits.call_args_list, 2)
    expected_output = np.array(
        [[2, 2, 2, 0, 0, 0, 0, 0], [3, 4, 3, 3, 0, 0, 0, 0]], dtype=np.int32)
    expected_output = jnp.expand_dims(expected_output, 1)

    np.testing.assert_array_equal(decodes, expected_output)

  def test_temperature_sample_max_decode_steps_hard_limit(self):
    max_decode_steps = 10
    max_decode_steps_hard_limit = 4
    rng0 = jax.random.PRNGKey(0)
    inputs = np.array([[0, 2, 0, 0, 0, 0, 0, 0], [0, 2, 2, 0, 0, 0, 0, 0]],
                      dtype=np.int32)

    token_to_logits = mock.Mock()
    token_to_logits.return_value = (np.array(
        [[-1e7, -1e7, -1e7, 0], [-1e7, -1e7, -1e7, 0]], dtype=np.float32), {})

    # to unroll while loop
    with jax.disable_jit():
      decodes, scores = decoding.temperature_sample(
          inputs, {},
          token_to_logits,
          EOS_ID,
          rng0,
          topk=4,
          max_decode_steps=max_decode_steps,
          max_decode_steps_hard_limit=max_decode_steps_hard_limit)

    expected_output = np.array([[2, 3, 3, 3, 3, 0, 0, 0],
                                [2, 2, 3, 3, 3, 3, 0, 0]])
    expected_output = jnp.expand_dims(expected_output, 1)

    np.testing.assert_array_equal(decodes, expected_output)
    np.testing.assert_array_equal(scores, [[0.], [0.]])

  def test_temperature_sample_topp(self):
    rng0 = jax.random.PRNGKey(0)
    inputs = np.zeros((1, 20), dtype=np.int32)

    token_to_logits = mock.Mock()

    # logits correspond to (0.3, 0, 0.1, 0.6)
    token_to_logits.return_value = (np.array([[-1.2, -1e7, -2.3, -0.51]],
                                             dtype=np.float32), {})

    decodes, scores = decoding.temperature_sample(
        inputs, {}, token_to_logits, EOS_ID, rng0, topp=0.55,
        topk=0)  # anything under 0.6 will trigger deterministic decoding.

    expected_output = np.array([[3] * 20])
    expected_output = jnp.expand_dims(expected_output, 1)

    np.testing.assert_array_equal(decodes, expected_output)
    np.testing.assert_array_equal(scores, [[0.]])

    # temperature is applied first, so the distribution becomes
    # (0.27, 0, 0.069, 0.65), so if topp is 0.63, it should become greedy.
    decodes, scores = decoding.temperature_sample(
        inputs, {},
        token_to_logits,
        EOS_ID,
        rng0,
        temperature=0.8,
        topp=0.63,
        topk=0)

    expected_output = np.array([[3] * 20])
    expected_output = jnp.expand_dims(expected_output, 1)

    np.testing.assert_array_equal(decodes, expected_output)
    np.testing.assert_array_equal(scores, [[0.]])

  def test_dynamic_topp_max_decode_steps(self):
    rng0 = jax.random.PRNGKey(0)
    inputs = np.zeros((1, 20), dtype=np.int32)

    token_to_logits = mock.Mock()

    # logits correspond to (0.3, 0, 0.1, 0.6)
    token_to_logits.return_value = (np.array([[-1.2, -1e7, -2.3, -0.51]],
                                             dtype=np.float32), {})

    def dynamic_decode_fn(inputs, temperature, topp, max_decode_steps):
      return decoding.temperature_sample(
          inputs, {},
          token_to_logits,
          EOS_ID,
          rng0,
          temperature=temperature,
          topp=topp,
          topk=0,
          max_decode_steps=max_decode_steps)

    dynamic_decode_fn_jit = jax.jit(dynamic_decode_fn)

    decodes, scores = dynamic_decode_fn_jit(inputs, 0.8, 0.63, 10)

    expected_output = np.array([[3] * 10 + [0] * 10])
    expected_output = jnp.expand_dims(expected_output, 1)

    np.testing.assert_array_equal(decodes, expected_output)
    np.testing.assert_array_equal(scores, [[0.]])

  def test_topp_log_probs(self):
    rng0 = jax.random.PRNGKey(0)
    inputs = np.zeros((1, 1), dtype=np.int32)

    token_to_logits = mock.Mock()

    # logits correspond to (0.3, 0, 0.1, 0.6)
    token_to_logits.return_value = (np.array([[-1.2, NEG_INF, -2.3, -0.51]],
                                             dtype=np.float32), {})

    with jax.disable_jit():
      # this lets us see logits after topp and topk are applied
      with mock.patch.object(jax.random, 'categorical') as mocked:
        mocked.return_value = jnp.array([0], dtype=jnp.int32)
        decodes, _ = decoding.temperature_sample(
            inputs, {},
            token_to_logits,
            EOS_ID,
            rng0,
            temperature=1.4,
            topp=0.7,
            topk=0)

    self.assertLen(token_to_logits.call_args_list, 1)
    np.testing.assert_array_equal(decodes, jnp.asarray([[[0]]]))

    np.testing.assert_array_almost_equal(
        mocked.call_args_list[0][0][1],
        jnp.asarray([[-0.85714293, NEG_INF, NEG_INF, -0.36428571]]))

  def test_add_beam_dim(self):
    x = np.array([[0, 5, 1, 0], [0, 8, 6, 9]], dtype=np.int32)
    y = decoding.add_beam_dim(x, beam_size=3)
    self.assertEqual(y.shape, (2, 3, 4))
    np.testing.assert_array_equal([[[0, 5, 1, 0], [0, 5, 1, 0], [0, 5, 1, 0]],
                                   [[0, 8, 6, 9], [0, 8, 6, 9], [0, 8, 6, 9]]],
                                  y)

  def test_flat_batch_beam_expand(self):
    x = np.array([[0, 5, 1, 0], [0, 8, 6, 9]], dtype=np.int32)
    np.testing.assert_array_equal(
        [[0, 5, 1, 0], [0, 5, 1, 0], [0, 8, 6, 9], [0, 8, 6, 9]],
        decoding.flat_batch_beam_expand(x, beam_size=2))

  def test_top_k_two_stage(self):

    def _test_top_k(batch_size, k):
      # Pick sufficiently large seq_len.
      seq_len = 2047 * k * batch_size
      seq = np.arange(seq_len)
      np.random.shuffle(seq)
      x = jnp.reshape(seq, (batch_size, int(seq_len / batch_size))).astype(
          jnp.float32)
      np.testing.assert_almost_equal(
          decoding.top_k_two_stage(x, k), jax.lax.top_k(x, k), decimal=5)

    # Test small batch cases (batch={1,8}, k=16).
    _test_top_k(1, 16)
    _test_top_k(8, 16)
    # Test large batch cases (batch={9,32}, k=11).
    _test_top_k(9, 11)
    _test_top_k(32, 11)

  def test_cache_map(self):
    cache = {
        'layers_0': {
            'cached_key': jnp.ones([3, 6]),
            'cached_values': jnp.ones([3, 6]),
            'cache_index': jnp.ones([
                3,
            ]),
        },
        'layers_1': {
            'self_attention': {
                'cached_key': jnp.ones([2, 7]),
                'cached_values': jnp.ones([5, 8]),
                'cache_index': jnp.array(1),
            },
            'encoder_decoder_attention': {
                'cached_key': jnp.ones([10, 12, 2]),
                'cached_values': jnp.ones([4, 7, 2]),
                'cache_index': jnp.ones([4, 5, 6]),
            }
        },
    }

    fn = functools.partial(jnp.add, 4)

    gold_cache = {
        'layers_0': {
            'cached_key': fn(jnp.ones([3, 6])),
            'cached_values': fn(jnp.ones([3, 6])),
            'cache_index': jnp.ones([
                3,
            ]),
        },
        'layers_1': {
            'self_attention': {
                'cached_key': fn(jnp.ones([2, 7])),
                'cached_values': fn(jnp.ones([5, 8])),
                'cache_index': jnp.array(1),
            },
            'encoder_decoder_attention': {
                'cached_key': fn(jnp.ones([10, 12, 2])),
                'cached_values': fn(jnp.ones([4, 7, 2])),
                'cache_index': jnp.ones([4, 5, 6]),
            }
        }
    }

    jax.tree_multimap(np.testing.assert_array_equal,
                      decoding.cache_map(fn, cache), gold_cache)

  def test_cache_map_with_index(self):
    cache = {
        'layers_0': {
            'cached_key': jnp.ones([3, 6]),
            'cached_values': jnp.ones([3, 6]),
            'cache_index': jnp.ones([
                3,
            ]),
        },
        'layers_1': {
            'relpos_bias': {
                'cached_bias': jnp.ones([1, 5, 3]),
            },
            'self_attention': {
                'cached_key': jnp.ones([2, 7]),
                'cached_values': jnp.ones([5, 8]),
                'cache_index': jnp.array(1),
            },
            'encoder_decoder_attention': {
                'cached_key': jnp.ones([10, 12, 2]),
                'cached_values': jnp.ones([4, 7, 2]),
                'cache_index': jnp.ones([4, 5, 6]),
            }
        },
        'position_embedder': {
            'position_embedder_index': jnp.array(-1),
        },
    }

    fn = functools.partial(jnp.add, 8)

    gold_cache = {
        'layers_0': {
            'cached_key': fn(jnp.ones([3, 6])),
            'cached_values': fn(jnp.ones([3, 6])),
            'cache_index': fn(jnp.ones([
                3,
            ])),
        },
        'layers_1': {
            'relpos_bias': {
                'cached_bias': jnp.ones([1, 5, 3]),
            },
            'self_attention': {
                'cached_key': fn(jnp.ones([2, 7])),
                'cached_values': fn(jnp.ones([5, 8])),
                'cache_index': fn(jnp.array(1)),
            },
            'encoder_decoder_attention': {
                'cached_key': fn(jnp.ones([10, 12, 2])),
                'cached_values': fn(jnp.ones([4, 7, 2])),
                'cache_index': fn(jnp.ones([4, 5, 6])),
            }
        },
        'position_embedder': {
            'position_embedder_index': jnp.array(-1),
        },
    }

    jax.tree_multimap(np.testing.assert_array_equal,
                      decoding.cache_map(fn, cache, apply_to_index=True),
                      gold_cache)

  def test_beam_search(self):
    # Toy problem, we have 4 states, A, B, START, END, (plus PAD).
    # Scores are given by a first-order Markov model.
    batch_size = 2
    beam_size = 2
    # PAD doesn't matter for this test, but part of the contract for beam_search
    # is giving the PAD token id 0.
    states = ['PAD', 'A', 'B', 'START-', '-END']
    num_states = len(states)
    decode_length = 7

    # Edge potentials (written inside edges for diagonals):
    #            1      -1     1      -1
    #         A ---- A ---- A ---- A ---- A
    #       0   \  -1  \  1   \  -1  \  1   0
    # START      X      X      X      X       END
    #       0   /  -1  /  1   /  -1  /  1   0
    #         B ---- B ---- B ---- B ---- B
    #            1      -1     1      -1

    # put the above edge potentials in a 3-tensor
    ab_edge_potentials = np.asarray([[[1, -1], [-1, 1]], [[-1, 1], [1, -1]],
                                     [[1, -1], [-1, 1]], [[-1, 1], [1, -1]]])
    # now we have to add on the START, END states
    # and PAD at 0
    edge_potentials = np.ones([6, 5, 5]) * NEG_INF
    edge_potentials[1:5, 1:3, 1:3] = ab_edge_potentials
    # START can go to either A or B for free at t0
    edge_potentials[0, 3, 1] = 0
    edge_potentials[0, 3, 2] = 0
    # either A or B can go to END for free at t5
    edge_potentials[5, 1, 4] = 0
    edge_potentials[5, 2, 4] = 0
    # PAD can go to anything for free (doesn't matter for this test)
    edge_potentials[:, 0, :] = 0

    edge_potentials = jnp.asarray(edge_potentials)

    # at time 0, we start with state=START=3
    logits0 = jnp.asarray([NEG_INF, NEG_INF, NEG_INF, 0, NEG_INF])

    # add dummy flattened batch x beam dim for broadcasting
    logits0 = jnp.expand_dims(logits0, axis=0)
    edge_potentials = jnp.expand_dims(edge_potentials, axis=0)

    def tokens_to_logits(
        token_indices: jnp.ndarray, state_cache: Mapping[str, jnp.ndarray]
    ) -> Tuple[jnp.ndarray, Mapping[str, jnp.ndarray]]:
      cur_iter = state_cache['cur_iter']
      # grab edge potentials for the current timestep
      cur_edge_potentials = jnp.take_along_axis(
          edge_potentials,
          jnp.reshape(
              jnp.maximum(0, cur_iter[:, 0].astype(jnp.int32) - 1),
              (batch_size * beam_size, 1, 1, 1)),
          axis=1)
      cur_edge_potentials = jnp.squeeze(cur_edge_potentials, axis=1)
      # get "logits" from edge potentials for requested tokens (except at t0)
      cur_logits = jnp.matmul(
          jnp.reshape(
              jax.nn.one_hot(token_indices, num_states, axis=1),
              (batch_size * beam_size, 1, num_states)), cur_edge_potentials)
      cur_logits = jnp.squeeze(cur_logits, axis=1)
      # use our START-only logits for t0, otherwise use the edge potentials
      logits_for_tokens = jnp.where(cur_iter == 0, logits0, cur_logits)
      # update state in the cache
      new_cache = state_cache.copy()
      new_cache['cur_iter'] = cur_iter + 1
      return logits_for_tokens, new_cache

    init_cache = {}
    init_cache['cur_iter'] = jnp.zeros((batch_size, 1))

    top_scoring, _ = decoding.beam_search(
        inputs=np.zeros([batch_size, decode_length]),
        cache=init_cache,
        tokens_to_logits=tokens_to_logits,
        eos_id=4,
        num_decodes=beam_size,
        alpha=0.0,
        max_decode_len=decode_length)

    # The two top scoring sequences should be a tie between
    # START-AABBA-END
    # and
    # START-BBAAB-END
    # (and greedy beam search will find both these with just two beams)

    top_scoring_strings = [
        ''.join(states[tok]
                for tok in top_scoring[0, i, :])
        for i in range(beam_size)
    ]

    expected = ['START-AABBA-END', 'START-BBAAB-END']
    np.testing.assert_array_equal(expected, top_scoring_strings)

  def test_beam_search_force_decode_prefix(self):
    beam_size = 2

    def token_to_logits(ids, cache):  # pylint: disable=unused-argument
      # Use id 2 then 3 for batch element 0 and id 3 then 2 for element 1.
      logits = np.repeat(
          np.expand_dims(
              np.array([[-1e7, -1e10, -0.1, -0.9, -1e4, -1e4, -1e4, -1e4],
                        [-1e7, -1e10, -0.9, -0.1, -1e4, -1e4, -1e4, -1e4]],
                       dtype=np.float32),
              axis=1), [beam_size],
          axis=1)
      logits = decoding.flatten_beam_dim(logits)
      return logits, {}

    # batch element 0 has length 1 and element 1 has length 2.
    inputs = np.array([[0, 7, 0, 0, 0], [0, 4, 5, 0, 0]], dtype=np.int32)
    rolled_inputs = np.array([[7, 0, 0, 0, 0], [4, 5, 0, 0, 0]], dtype=np.int32)
    beam_search_sequences, decoding_scores = decoding.beam_search(
        inputs, {}, token_to_logits, EOS_ID, num_decodes=beam_size, alpha=0)

    # Prefixes are forced depending on inputs.
    # Beam search sequences and corresponding scores are in reverse order.
    self.assertTrue(np.all(np.diff(decoding_scores) >= 0))
    expected = np.array([[[7, 3, 2, 2, 2], [7, 2, 2, 2, 2]],
                         [[4, 5, 2, 3, 3], [4, 5, 3, 3, 3]]])
    np.testing.assert_array_equal(expected, beam_search_sequences)

    expected_scores = []
    batch_logits = np.array([[-1e7, -1e10, -0.1, -0.9, -1e4, -1e4, -1e4, -1e4],
                             [-1e7, -1e10, -0.9, -0.1, -1e4, -1e4, -1e4, -1e4]],
                            dtype=np.float32)
    for batch, logits, prompt in zip(expected, batch_logits, rolled_inputs):
      beam_expected_scores = []
      for beam in batch:
        log_probs = jax.nn.log_softmax(logits)
        # Add them directly since they are static.
        beam_scores = []
        for token, prompt_token in zip(beam, prompt):
          if prompt_token != 0:
            beam_scores.append(0)
          else:
            beam_scores.append(log_probs[token])
        beam_expected_scores.append(sum(beam_scores))
      expected_scores.append(beam_expected_scores)
    np.testing.assert_allclose(expected_scores, decoding_scores, atol=1e-5)

  def test_beam_search_force_decode_no_prefix(self):
    beam_size = 2

    def token_to_logits(ids, cache):  # pylint: disable=unused-argument
      # Use id 2 then 3 for batch element 0 and id 3 then 2 for element 1.
      logits = np.repeat(
          np.expand_dims(
              np.array([[-1e7, -1e10, -0.1, -0.9], [-1e7, -1e10, -0.9, -0.1]],
                       dtype=np.float32),
              axis=1), [beam_size],
          axis=1)
      logits = decoding.flatten_beam_dim(logits)
      return logits, {}

    # No prefix is passed.
    inputs = np.array([[0, 0, 0, 0, 0], [0, 0, 0, 0, 0]], dtype=np.int32)
    beam_search_sequences, decoding_scores = decoding.beam_search(
        inputs, {}, token_to_logits, EOS_ID, num_decodes=beam_size)

    # Prefixes are forced depending on inputs.
    # Beam search sequences and corresponding scores are in reverse order.
    self.assertTrue(np.all(np.diff(decoding_scores) >= 0))
    expected = np.array([[[3, 2, 2, 2, 2], [2, 2, 2, 2, 2]],
                         [[2, 3, 3, 3, 3], [3, 3, 3, 3, 3]]])
    np.testing.assert_array_equal(expected, beam_search_sequences)


if __name__ == '__main__':
  absltest.main()
