# Supplementary material
Source: ML conference proceedings conference paper supplement (https://proceedings.neurips.cc/paper_files/paper/2022/hash/89379d5fc6eb34ff98488202fb52b9d0-Abstract.html)
Supplement: Supplementary file 1 [file 89379d5fc6eb34ff98488202fb52b9d0-Supplemental-Conference.zip › supplementary_material/code/modified_t5x/t5x/gin_utils_test.py]

# Copyright 2022 The T5X Authors.
#
# Licensed under the Apache License, Version 2.0 (the "License");
# you may not use this file except in compliance with the License.
# You may obtain a copy of the License at
#
#     http://www.apache.org/licenses/LICENSE-2.0
#
# Unless required by applicable law or agreed to in writing, software
# distributed under the License is distributed on an "AS IS" BASIS,
# WITHOUT WARRANTIES OR CONDITIONS OF ANY KIND, either express or implied.
# See the License for the specific language governing permissions and
# limitations under the License.

"""Tests for gin_utils."""

from absl.testing import absltest
from t5x import gin_utils


class GinUtilsTest(absltest.TestCase):

  def test_rewrite_gin_args(self):
    test_args = [
        '--gin_file=path/to/file',
        'gin.value=3',
        '--gin.value=3',
        '--gin.value="3"',
        '--gin.value=\'3\'',
        '--gin.tricky="key = value"',
        '--gin.dict={"foo": 4, "bar": "four"}',
        '--gin.gin=bar',
        '--gin.scope/foo=bar',
    ]
    expected_args = [
        '--gin_file=path/to/file',
        'gin.value=3',
        '--gin_bindings=value = 3',
        '--gin_bindings=value = "3"',
        '--gin_bindings=value = \'3\'',
        '--gin_bindings=tricky = "key = value"',
        '--gin_bindings=dict = {"foo": 4, "bar": "four"}',
        '--gin_bindings=gin = bar',
        '--gin_bindings=scope/foo = bar',
    ]
    self.assertSequenceEqual(
        gin_utils.rewrite_gin_args(test_args), expected_args)

  def test_rewrite_gin_args_malformed(self):
    test_args = ['--gin.value=3', '--gin.test']
    with self.assertRaisesWithLiteralMatch(
        ValueError,
        "Gin bindings must be of the form '--gin.<param>=<value>', got: "
        '--gin.test'):
      gin_utils.rewrite_gin_args(test_args)


if __name__ == '__main__':
  absltest.main()
