# Supplementary material
Source: ML conference proceedings conference paper supplement (https://proceedings.neurips.cc/paper_files/paper/2022/hash/89379d5fc6eb34ff98488202fb52b9d0-Abstract.html)
Supplement: Supplementary file 1 [file 89379d5fc6eb34ff98488202fb52b9d0-Supplemental-Conference.zip › supplementary_material/code/modified_t5x/t5x/infer.py]

# Copyright 2022 The T5X Authors.
#
# Licensed under the Apache License, Version 2.0 (the "License");
# you may not use this file except in compliance with the License.
# You may obtain a copy of the License at
#
#     http://www.apache.org/licenses/LICENSE-2.0
#
# Unless required by applicable law or agreed to in writing, software
# distributed under the License is distributed on an "AS IS" BASIS,
# WITHOUT WARRANTIES OR CONDITIONS OF ANY KIND, either express or implied.
# See the License for the specific language governing permissions and
# limitations under the License.

# pylint:disable=line-too-long
# pyformat: disable
r"""This script runs inference on a T5X-compatible model.

"""
# pyformat: enable
# pylint:enable=line-too-long

import concurrent.futures
import functools
import hashlib
import json
import os
import re
import shutil
import time
from typing import Any, Callable, Iterator, List, Mapping, Optional, Sequence, Tuple, Type

# TODO(adarob): Re-enable once users are notified and tests are updated.
# Must be set before flax imports.
# pylint:disable=g-import-not-at-top
os.environ['FLAX_LAZY_RNG'] = 'no'
from absl import logging
import jax
from jax.experimental import multihost_utils
import jax.numpy as jnp
import numpy as np
import seqio
from t5x import models
from t5x import partitioning
from t5x import utils
import tensorflow as tf
from tensorflow.io import gfile

# Automatically search for gin files relative to the T5X package.
_DEFAULT_GIN_SEARCH_PATHS = [
    os.path.dirname(os.path.dirname(os.path.abspath(__file__)))
]

AUTOTUNE = tf.data.experimental.AUTOTUNE


class FailFastThreadPoolExecutor(concurrent.futures.ThreadPoolExecutor):
  """Wrapper for ThreadPoolExecutor that crashes main thread on exceptions.

  NOTE: this class should be used only from the main thread.
  """

  def __init__(self, *args, **kwargs):
    super().__init__(*args, **kwargs)
    self._incomplete_futures: List[concurrent.futures.Future[Any]] = []

  def check_for_exceptions(self, wait: bool = False):
    """Raises any exceptions from complete futures on the main thread."""
    still_incomplete_futures = []
    for future in self._incomplete_futures:
      try:
        exception = future.exception(timeout=0 if wait else None)
      except concurrent.futures.TimeoutError:
        still_incomplete_futures.append(future)
      if exception is not None:
        raise exception

    self._incomplete_futures = still_incomplete_futures

  def submit(self, *args, **kwargs) -> concurrent.futures.Future[Any]:
    """Submit function to threadpool, capturing the returned future."""
    future = super().submit(*args, **kwargs)
    self._incomplete_futures.append(future)
    self.check_for_exceptions(wait=False)
    return future

  def shutdown(self, *args, wait: bool = False, **kwargs):
    self.check_for_exceptions(wait=wait)
    super().shutdown(*args, **kwargs)


def create_task_from_tfexample_file(paths: Sequence[str],
                                    file_type: str,
                                    inputs_key: str,
                                    targets_key: Optional[str],
                                    features: Mapping[str, seqio.Feature],
                                    task_id: Optional[str] = None) -> str:
  """Registers ad-hoc Task for file-based dataset of TFExamples.

  Args:
    paths: Input file paths; all files should have type `file_type` and contain
      binary-serialized TFExample protos.
    file_type: Input file type; e.g., 'tfrecord', 'recordio', 'sstable'. For
      keyed formats like 'sstable', we ignore the keys and use only the values.
    inputs_key: Name of TFExample feature containing the input text for T5X. The
      value of this feature should be a UTF8-encoded string.
    targets_key: Optional name of a TFExample feature containing the target text
      (relevant only in scoring mode). The value of this feature should be a
      UTF8-encoded string.
    features: Should have entries for keys 'inputs' and (if targets_key is not
      None) 'targets', mapping to `seqio.Feature` objects that specify
      attributes like vocabulary, add_eos, etc. These attributes are used for
      preprocessing and featurizing the input text.
    task_id: Task name identifier. By default, it is set to a unique and
      deterministic hash id. Overrideable via this argument.

  Returns:
    Name of the newly-registered Task. This Task has a split named 'infer' that
    contains the preprocessed and featurized input dataset.
  """
  # tf.io.gfile.glob supports lists, in contrast to gfile.glob.
  files = tf.io.gfile.glob(paths)
  if files:
    logging.info('Using tfexample files %s', files)
  else:
    # Fail early if there's something wrong with the input file pattern.
    raise ValueError('Missing or invalid paths: %s' % paths)
  reader = {
      'tfrecord':
          tf.data.TFRecordDataset,
  }[file_type]

  feature_description = {inputs_key: tf.io.FixedLenFeature([], tf.string)}
  if targets_key:
    feature_description[targets_key] = tf.io.FixedLenFeature([], tf.string)

  # Create a unique, deterministic task name.
  if task_id is None:
    task_id = hashlib.md5(
        ':'.join(list(paths) +
                 [inputs_key, targets_key or '']).encode()).hexdigest()[:10]

  task = seqio.TaskRegistry.add(
      name=f'infer_{task_id}',
      source=seqio.TFExampleDataSource({'infer': paths},
                                       feature_description=feature_description,
                                       reader_cls=reader),
      preprocessors=[
          functools.partial(
              seqio.preprocessors.rekey,
              key_map={
                  'inputs': inputs_key,
                  'targets': targets_key
              }), seqio.preprocessors.tokenize_and_append_eos
      ],
      output_features=features)

  return task.name


def merge_chunks_to_file(
    output_dir: str,
    output_fname: str,
    tmp_dir: str,
    step: Optional[int],
) -> None:
  """Merge the predictions from different chunks into a unified file."""
  logging.info('Merging chunk results.')
  # Merge chunks into single file.
  chunk_paths = sorted(
      gfile.glob(os.path.join(tmp_dir, f'{output_fname}-chunk?????')))

  if not chunk_paths:
    raise FileNotFoundError(
        'No chunk results found! One possible explanation is that your '
        'input did not contain any examples')

  assert int(chunk_paths[-1][-5:]) + 1 == len(chunk_paths), (
      f'Expecting {int(chunk_paths[-1][-5:])} chunk paths, found '
      f'{len(chunk_paths)}')
  output_path = os.path.join(output_dir, output_fname)
  del step
  with gfile.GFile(output_path, 'wb') as merged:
    for chunk_path in chunk_paths:
      with gfile.GFile(chunk_path, 'rb') as ef:
        shutil.copyfileobj(ef, merged)
  logging.info('Results written to %s.', output_path)


def write_inferences_to_file(
    path: str,
    inferences: Sequence[Any],
    task_ds: tf.data.Dataset,
    mode: str,
    vocabulary: Optional[seqio.Vocabulary] = None,
    json_encoder_cls: Type[json.JSONEncoder] = seqio.TensorAndNumpyEncoder,
    include_all_inputs: bool = False,
    input_fields_to_include: Optional[Sequence[str]] = None,
    output_ids: bool = False) -> None:
  """Write model predictions, along with pretokenized inputs, to JSONL file.

  Args:
    path: File path to write to.
    inferences: Model inferences, output of either score_batch or predict_batch.
    task_ds: Original task dataset. Features from task with suffix
      `_pretokenized` are added to the outputs.
    mode: Prediction mode, either 'predict', 'score' or 'predict_with_aux'.
    vocabulary: Task output vocabulary. Only used in `predict` mode in order to
      decode predicted outputs into string.
    json_encoder_cls: a JSON encoder class used to customize JSON serialization
      via json.dumps.
    include_all_inputs: if True, will include all model inputs in the output
      JSONL file (including raw tokens) in addition to the pretokenized inputs.
    input_fields_to_include: List of input fields to include in the output JSONL
      file. This list should be None if `include_all_inputs` is set to True.
    output_ids: if True, will output the token ID sequence for the output, in
      addition to the decoded text.
  """
  if mode in ('predict', 'predict_with_aux') and vocabulary is None:
    raise ValueError('The `vocabulary` parameter is required in `predict` and '
                     '`predict_with_aux` modes')

  def _json_compat(value):
    if isinstance(value, bytes):
      return value.decode('utf-8')
    elif isinstance(value, (jnp.bfloat16, jnp.floating)):
      return float(value)
    elif isinstance(value, jnp.integer):
      return float(value)
    elif isinstance(value, (jnp.ndarray, np.ndarray)):
      # Flatten array features.
      return value.tolist()
    else:
      return value

  if include_all_inputs and input_fields_to_include is not None:
    raise ValueError(
        'include_all_inputs and input_fields_to_include should not be set'
        ' simultaneously.')
  with gfile.GFile(path, 'w') as f:
    for inp, output in zip(task_ds, inferences):
      if include_all_inputs:
        inputs = inp
      elif input_fields_to_include is not None:
        inputs = {
            k: v for k, v in inp.items() if k in input_fields_to_include or
            (k.endswith('_pretokenized') and
             k[:-len('_pretokenized')] in input_fields_to_include)
        }
      else:
        inputs = {k: v for k, v in inp.items() if k.endswith('_pretokenized')}

      json_dict = {}
      json_dict['inputs'] = {
          k: _json_compat(v.numpy()) for k, v in inputs.items()
      }

      if mode == 'predict':
        assert vocabulary is not None
        json_dict['prediction'] = _json_compat(
            vocabulary.decode_tf(tf.constant(output)).numpy())
        if output_ids:
          pred = _json_compat(tf.constant(output).numpy())
          # Truncate padding tokens.
          assert isinstance(pred, list)
          pred = pred[:pred.index(0)] if 0 in pred else pred
          json_dict['prediction_tokens'] = pred
      elif mode == 'score':
        json_dict['score'] = _json_compat(output)
      elif mode == 'predict_with_aux':
        assert vocabulary is not None
        pred_ids, pred_aux = output
        json_dict['prediction'] = _json_compat(
            vocabulary.decode_tf(tf.constant(pred_ids)).numpy())
        if output_ids:
          pred = _json_compat(tf.constant(pred_ids).numpy())
          # Truncate padding tokens.
          pred = pred[:pred.index(0)] if 0 in pred else pred
          json_dict['prediction_tokens'] = pred
        json_dict['aux'] = jax.tree_map(_json_compat, pred_aux)
      else:
        raise ValueError(f'Invalid mode: {mode}')
      json_str = json.dumps(json_dict, cls=json_encoder_cls)
      f.write(json_str + '\n')


WriteFn = Callable[
    [str, Sequence[Any], tf.data.Dataset, str, Optional[seqio.Vocabulary]],
    None]

MergeFn = Callable[[str, str, str, Optional[int]], None]


def infer(
    *,
    mode: str,
    model: models.BaseTransformerModel,
    dataset_cfg: utils.DatasetConfig,
    restore_checkpoint_cfg: utils.RestoreCheckpointConfig,
    partitioner: partitioning.BasePartitioner,
    output_dir: str,
    checkpoint_period: int,
    shard_id: int = 0,
    num_shards: int = 1,
    merge_chunked_results: bool = True,
    write_fn: WriteFn = write_inferences_to_file,
    checkpoint_ds_iter: bool = True,
    fallback_init_rng: Optional[int] = None,
    merge_fn: MergeFn = merge_chunks_to_file,
):
  """Infer function.

  Args:
    mode: Either 'predict' to decode targets, 'score' to compute the log
      likelihood of given targets, or 'predict_with_aux' for both.
    model: The model object to use for inference.
    dataset_cfg: Specification for the dataset to infer based on.
    restore_checkpoint_cfg: Specification for the model parameter checkpoint to
      load.
    partitioner: Partitioner for model parameters and data across devices.
    output_dir: Path to directory to write temporary files and final results.
    checkpoint_period: The intermediate results and dataset iterator will be
      checkpointed on each multiple of this number of batches to enable
      continuation after a failure.
    shard_id: Index of dataset shard for this instance to use if splitting the
      work across multiple jobs.
    num_shards: Total number of dataset shards to split dataset across.
    merge_chunked_results: Whether to merge results of all chunks into a single
      json file.
    write_fn: Callable function used to serialized and write inferences out to
      files.
    checkpoint_ds_iter: if True, will checkpoint the dataset iterator every
      `checkpoint_period` to enable faster restore. This must be disabled for
      certain datasets, for example since stateful iterators (e.g. from
      seqio.FunctionTask) cannot be checkpointed.
    fallback_init_rng: A random seed used for parameter initialization during
      model re-loading when utils.RestoreCheckpointConfig.fallback_to_scratch is
      set to True. If None, parameter initialization is not allowed during model
      loading and having fallback_to_scratch enabled will result in an error.
    merge_fn: Callable function used to merge inferences from multiple files.
  """
  logging.info('Process ID: %d', jax.process_index())
  if mode not in ('predict', 'score', 'predict_with_aux'):
    raise ValueError(
        "`mode` must be one of 'predict', 'score' or 'predict_with_aux'. "
        f"Got '{mode}'")

  # Remove double-slashes in directory path to avoid inconsistencies.
  output_dir = re.sub(r'(?<!gs:)([\/]{2,})', '/', output_dir)
  ds_vocabs = utils.get_vocabulary(dataset_cfg)
  if (ds_vocabs[0] != model.input_vocabulary or
      ds_vocabs[1] != model.output_vocabulary):
    raise ValueError(
        'Model and Task vocabularies do not match.\n'
        f'Task Input: {ds_vocabs[0]}, Model Input: {model.input_vocabulary}\n'
        f'Task Output: {ds_vocabs[1]}, Model Output: {model.output_vocabulary}')

  batch_size = dataset_cfg.batch_size

  # Set up dataset.
  if dataset_cfg.module:
    utils.import_module(dataset_cfg.module)
  host_shard_info = seqio.ShardInfo(index=shard_id, num_shards=num_shards)
  task_or_mixture = seqio.get_mixture_or_task(dataset_cfg.mixture_or_task_name)

  feature_converter = model.FEATURE_CONVERTER_CLS(pack=False)

  def _get_dataset(dataset_provider):
    # TODO(adarob): assert pack is false, shuffle is false, seed?
    return dataset_provider.get_dataset(
        sequence_length=dataset_cfg.task_feature_lengths,
        split=dataset_cfg.split,
        shuffle=False,
        num_epochs=1,
        shard_info=host_shard_info,
        use_cached=dataset_cfg.use_cached,
        seed=dataset_cfg.seed)

  # Each "chunk" should be how often we checkpoint the input dataset and flush
  # the inferences to disk.
  logging.info('Inferring with checkpoints every %d batches of %d examples.',
               checkpoint_period, batch_size)

  logging.info('Initializing model, optimizer, and step functions.')
  element_spec = feature_converter(
      _get_dataset(task_or_mixture),
      dataset_cfg.task_feature_lengths).element_spec
  input_shapes = {
      k: (batch_size,) + spec.shape for k, spec in element_spec.items()
  }
  input_types = {
      k: jnp.dtype(spec.dtype.as_numpy_dtype)
      for k, spec in element_spec.items()
  }
  # Initialize optimizer from the existing checkpoint.
  # TODO(adarob): Support inference over multiple checkpoints.
  train_state_initializer = utils.TrainStateInitializer(
      optimizer_def=None,  # Do not load optimizer state.
      init_fn=model.get_initial_variables,
      input_shapes=input_shapes,
      input_types=input_types,
      partitioner=partitioner)
  # Log the variable shapes information and write to a file.
  model_info_log_file = os.path.join(output_dir, 'model-info.txt')
  if shard_id == 0:
    utils.log_model_info(model_info_log_file,
                         train_state_initializer.global_train_state_shape,
                         partitioner)

  # Disable strictness since we are dropping the optimizer state.
  restore_checkpoint_cfg.strict = False

  if fallback_init_rng is not None:
    fallback_init_rng = jax.random.PRNGKey(fallback_init_rng)
  train_state = train_state_initializer.from_checkpoint(
      [restore_checkpoint_cfg], init_rng=fallback_init_rng)
  if mode == 'predict':
    infer_step = model.predict_batch
  elif mode == 'predict_with_aux':
    infer_step = model.predict_batch_with_aux
  else:  # mode == 'score'
    infer_step = model.score_batch

  infer_fn = functools.partial(
      utils.get_infer_fn(
          infer_step=infer_step,
          batch_size=batch_size,
          train_state_axes=train_state_initializer.train_state_axes,
          partitioner=partitioner),
      train_state=train_state)

  def infer_task(task: seqio.Task):
    tmp_dir = os.path.join(output_dir,
                           f'tmp-{task.name}-{shard_id:05}-of-{num_shards:05}')
    if jax.process_index() == 0:
      gfile.makedirs(tmp_dir)

    # Use `max_workers=1` to ensure writes occur sequentially.
    write_thread_pool = FailFastThreadPoolExecutor(max_workers=1)

    logging.info("Loading dataset for task '%s'.", task.name)
    ds = _get_dataset(task)

    model_ds = feature_converter(
        ds, task_feature_lengths=dataset_cfg.task_feature_lengths)

    # Zip task and model features.
    # (task, model)
    infer_ds = tf.data.Dataset.zip((ds, model_ds))

    # Create batches the size of each chunk and index them.
    # (i, [(task, model)] * chunk_size)
    infer_ds = infer_ds.padded_batch(
        checkpoint_period * batch_size, drop_remainder=False).enumerate()

    infer_ds_iter: Iterator[Tuple[int, Any]] = iter(infer_ds.prefetch(AUTOTUNE))

    if checkpoint_ds_iter:
      # Create checkpoint manager and restore state, if applicable.
      ckpt_path = os.path.join(tmp_dir, 'input.ckpt')

      input_ckpt = tf.train.Checkpoint(ds=infer_ds_iter)
      if gfile.glob(ckpt_path + '*'):
        logging.info('Restoring input iterator from %s', ckpt_path)
        input_ckpt.read(ckpt_path).assert_consumed()

    output_fname = f'{task.name}-{mode}.jsonl-{shard_id:05}-of-{num_shards:05}'
    if gfile.exists(os.path.join(output_dir, output_fname)):
      logging.info(
          "File %s exists. Skipping inference for shard %d/%d of task '%s'",
          output_fname, shard_id, num_shards, task.name)
      return
    logging.info("Starting inference loop for shard %d of %d of task '%s'.",
                 shard_id, num_shards, task.name)

    def _write_chunk_and_canonicalize_ckpt(chunk: int, chunk_path: str,
                                           inferences: Sequence[Any],
                                           task_ds: tf.data.Dataset,
                                           chunk_ckpt_path: str):
      write_tick = time.time()
      logging.info('Writing chunk %d results to %s', chunk, chunk_path)
      write_fn(chunk_path, inferences, task_ds, mode,
               task.output_features['targets'].vocabulary)
      with gfile.GFile(chunk_ckpt_path + '.COMPLETED', 'w') as f:
        f.write()
      write_time = time.time() - write_tick
      logging.info('Writing completed in %02f seconds (%02f examples/sec).',
                   write_time,
                   len(inferences) / write_time)
      update_measurement_series('writing_total_sec', chunk, write_time)
      update_measurement_series('writing_examples_per_sec', chunk,
                                len(inferences) / write_time)

      if checkpoint_ds_iter:
        # Canonicalize checkpoint.
        for fname in gfile.glob(chunk_ckpt_path + '*'):
          gfile.rename(
              fname, fname.replace(chunk_ckpt_path, ckpt_path), overwrite=True)

    # Main Loop over "chunks".
    for chunk, chunk_batch in infer_ds_iter:
      logging.info('Starting chunk %d', chunk)

      chunk_tick = time.time()


      # Load the dataset for the next chunk. We can't use `infer_ds_iter`
      # directly since `infer_fn` needs to know the exact size of each chunk,
      # which may be smaller for the final one.
      chunk_ds = tf.data.Dataset.from_tensor_slices(chunk_batch)
      chunk_ds.cache().prefetch(AUTOTUNE)

      # Unzip chunk dataset in to pretokenized and model datasets.
      task_ds = chunk_ds.map(lambda p, m: p, num_parallel_calls=AUTOTUNE)
      model_ds = chunk_ds.map(lambda p, m: m, num_parallel_calls=AUTOTUNE)

      # Get a chunk-specific RNG key.
      chunk_rng = jax.random.fold_in(jax.random.PRNGKey(0), chunk)
      chunk_path = os.path.join(tmp_dir, f'{output_fname}-chunk{chunk:05}')
      if gfile.exists(chunk_path + '.COMPLETED') and not checkpoint_ds_iter:
        logging.info('Skipping chunk %s. Chunk file already exists.', chunk)
        continue

      logging.info('Running inference on %d batches.', checkpoint_period)
      # Sort by and strip index.
      inferences = [
          x[1] for x in sorted(
              infer_fn(model_ds.enumerate(), rng=chunk_rng), key=lambda x: x[0])
      ]

      if jax.process_index() == 0:
        chunk_time = time.time() - chunk_tick
        logging.info('chunk completed in %02f seconds (%02f examples/sec).',
                     chunk_time,
                     len(inferences) / chunk_time)
        update_measurement_series('inference_total_sec', chunk, chunk_time)
        update_measurement_series('inference_examples_per_sec', chunk,
                                  len(inferences) / chunk_time)

        chunk_ckpt_path = None
        if checkpoint_ds_iter:
          # Store iterator checkpoint in temporary location before writing the
          # model output asynchronously. After outputs are written, the
          # checkpoint will be moved to the canonical location to be used if
          # restart occurs.
          ckpt_tick = time.time()
          chunk_ckpt_path = input_ckpt.write(
              os.path.join(tmp_dir, f'{chunk}.ckpt'))
          logging.info(
              'Checkpoint written to temporary location in %02f seconds.',
              time.time() - ckpt_tick)

        # These will execute sequentially since the ThreadPool size is 1.
        write_thread_pool.submit(
            _write_chunk_and_canonicalize_ckpt,
            chunk=chunk,
            chunk_path=chunk_path,
            inferences=inferences,
            task_ds=task_ds,
            chunk_ckpt_path=chunk_ckpt_path)

      # Wait for checkpoint to be written before continuing.
      multihost_utils.sync_global_devices(
          f'{task.name}:checkpoint_chunk{chunk:05}')

    logging.info("Finished inference for task '%s'.", task.name)

    logging.info('Waiting for chunk writes to complete.')
    write_thread_pool.shutdown(wait=True)

    if jax.process_index() == 0 and merge_chunked_results:
      step = None if train_state is None else int(train_state.step)
      merge_fn(output_dir, output_fname, tmp_dir, step)
      logging.info('Deleting temporary files.')
      gfile.rmtree(tmp_dir)

    # Wait for host 0 to finish writing before exiting.
    multihost_utils.sync_global_devices(f'{task.name}:complete')

  for task in seqio.get_subtasks(task_or_mixture):
    logging.info("Starting inference for task '%s'", task.name)
    infer_task(task)
  logging.info('DONE')


def update_measurement_series(series_name: str, step: int, value: float):
  """Not implemented externally."""
  del series_name, step, value


if __name__ == '__main__':
  # pylint:disable=g-import-not-at-top
  from absl import app
  from absl import flags
  import gin
  from t5x import gin_utils
  # pylint:enable=g-import-not-at-top

  FLAGS = flags.FLAGS

  jax.config.parse_flags_with_absl()

  flags.DEFINE_integer(
      'shard_id',
      default=None,
      help='Index to use for splitting the Task across multiple inference '
      'runs. NB: If set, this overrides --gin.infer.shard_id')

  flags.DEFINE_multi_string(
      'gin_file',
      default=None,
      help='Path to gin configuration file. Multiple paths may be passed and '
      'will be imported in the given order, with later configurations  '
      'overriding earlier ones.')

  flags.DEFINE_multi_string(
      'gin_bindings', default=[], help='Individual gin bindings.')

  flags.DEFINE_list(
      'gin_search_paths',
      default=['.'],
      help='Comma-separated list of gin config path prefixes to be prepended '
      'to suffixes given via `--gin_file`. If a file appears in. Only the '
      'first prefix that produces a valid path for each suffix will be '
      'used.')

  flags.DEFINE_string(
      'tfds_data_dir', None,
      'If set, this directory will be used to store datasets prepared by '
      'TensorFlow Datasets that are not available in the public TFDS GCS '
      'bucket. Note that this flag overrides the `tfds_data_dir` attribute of '
      'all `Task`s.')


  def main(argv: Sequence[str]):
    """Wrapper for pdb post mortems."""
    _main(argv)

  def _main(argv: Sequence[str]):
    """True main function."""
    if len(argv) > 1:
      raise app.UsageError('Too many command-line arguments.')

    if FLAGS.tfds_data_dir:
      seqio.set_tfds_data_dir_override(FLAGS.tfds_data_dir)


    # Create gin-configurable version of `infer`.
    infer_using_gin = gin.configurable(infer)

    gin_utils.parse_gin_flags(
        # User-provided gin paths take precedence if relative paths conflict.
        FLAGS.gin_search_paths + _DEFAULT_GIN_SEARCH_PATHS,
        FLAGS.gin_file,
        FLAGS.gin_bindings)

    # See http://yaqs/7882016229479677952 for further gin-config discussion.
    def _get_gin_parameter(key: str) -> Any:
      value = gin.query_parameter(key)
      if isinstance(value, gin.config.ConfigurableReference):
        if value.evaluate:
          return value.scoped_configurable_fn()
        return value.scoped_configurable_fn
      return value

    shard_id = (
        FLAGS.shard_id
        if FLAGS.shard_id is not None else _get_gin_parameter('infer.shard_id'))
    if shard_id == 0:
      gin_utils.summarize_gin_config(
          model_dir=_get_gin_parameter('infer.output_dir'),
          summary_writer=None,
          step=0)
    if FLAGS.shard_id is not None:
      # We fall back to this flag since XM does not support sweeps over flags
      # with '.' in them (it treats them like nested dictionaries).
      # TODO(adarob): Figure out a workaround so we can deprecate this flag.
      infer_using_gin(shard_id=FLAGS.shard_id)
    else:
      infer_using_gin()


  gin_utils.run(main)
