# Supplementary material
Source: ML conference proceedings conference paper supplement (https://proceedings.neurips.cc/paper_files/paper/2022/hash/89379d5fc6eb34ff98488202fb52b9d0-Abstract.html)
Supplement: Supplementary file 1 [file 89379d5fc6eb34ff98488202fb52b9d0-Supplemental-Conference.zip › supplementary_material/code/modified_text-to-text-transfer-transformer/build_custom_datasets/utils.py]

import os


def wc_files(file_objs):
  for f in file_objs:
    os.system(f'wc -l {f.name} ')


def head_files(file_objs, n=2):
  for f in file_objs:
    print('======')
    print(f.name)
    print('---')
    os.system(f'head -n {n} {f.name}')
