# Supplementary material
Source: ML conference proceedings conference paper supplement (https://proceedings.neurips.cc/paper_files/paper/2022/hash/89379d5fc6eb34ff98488202fb52b9d0-Abstract.html)
Supplement: Supplementary file 1 [file 89379d5fc6eb34ff98488202fb52b9d0-Supplemental-Conference.zip › supplementary_material/code/modified_text-to-text-transfer-transformer/requirements.txt]

absl-py
babel
editdistance
gin-config
mesh-tensorflow[transformer]>=0.1.13
nltk
numpy
pandas
rouge-score
sacrebleu
scikit-learn
scipy
sentencepiece
seqio-nightly
six>=1.14  # TODO(adarob): Remove once rouge-score is updated.
tensorflow-text
tfds-nightly
torch
transformers>=2.7.0
