# Supplementary material
Source: ML conference proceedings conference paper supplement (https://proceedings.neurips.cc/paper_files/paper/2022/hash/89379d5fc6eb34ff98488202fb52b9d0-Abstract.html)
Supplement: Supplementary file 1 [file 89379d5fc6eb34ff98488202fb52b9d0-Supplemental-Conference.zip › supplementary_material/code/modified_text-to-text-transfer-transformer/t5.egg-info/entry_points.txt]

[console_scripts]
t5_cache_tasks = seqio.scripts.cache_tasks_main:console_entry_point
t5_inspect_tasks = seqio.scripts.inspect_tasks_main:console_entry_point
t5_mesh_transformer = t5.models.mesh_transformer_main:console_entry_point
