# Supplementary material
Source: ML conference proceedings conference paper supplement (https://proceedings.neurips.cc/paper_files/paper/2022/hash/89379d5fc6eb34ff98488202fb52b9d0-Abstract.html)
Supplement: Supplementary file 1 [file 89379d5fc6eb34ff98488202fb52b9d0-Supplemental-Conference.zip › supplementary_material/code/modified_text-to-text-transfer-transformer/t5.egg-info/SOURCES.txt]

LICENSE
README.md
setup.py
t5/__init__.py
t5/version.py
t5.egg-info/PKG-INFO
t5.egg-info/SOURCES.txt
t5.egg-info/dependency_links.txt
t5.egg-info/entry_points.txt
t5.egg-info/requires.txt
t5.egg-info/top_level.txt
t5/data/__init__.py
t5/data/_print_tasks.py
t5/data/dataset_providers.py
t5/data/dataset_providers_test.py
t5/data/glue_utils.py
t5/data/mixtures.py
t5/data/postprocessors.py
t5/data/postprocessors_test.py
t5/data/preprocessors.py
t5/data/preprocessors_test.py
t5/data/tasks.py
t5/data/utils.py
t5/evaluation/__init__.py
t5/evaluation/eval_utils.py
t5/evaluation/eval_utils_test.py
t5/evaluation/metrics.py
t5/evaluation/metrics_test.py
t5/evaluation/qa_utils.py
t5/evaluation/qa_utils_test.py
t5/evaluation/test_utils.py
t5/models/__init__.py
t5/models/hf_model.py
t5/models/mesh_transformer.py
t5/models/mesh_transformer_main.py
t5/models/mesh_transformer_test.py
t5/models/mtf_model.py
t5/models/t5_model.py
t5/models/utils.py
t5/models/gin/__init__.py
t5/models/gin/beam_search.gin
t5/models/gin/dataset.gin
t5/models/gin/eval.gin
t5/models/gin/greedy_decode.gin
t5/models/gin/infer.gin
t5/models/gin/infer_from_task.gin
t5/models/gin/perplexity_eval.gin
t5/models/gin/sample_decode.gin
t5/models/gin/score_eval.gin
t5/models/gin/score_from_file.gin
t5/models/gin/score_from_task.gin
t5/models/gin/task_adapter.gin
t5/models/gin/learning_rate_schedules/__init__.py
t5/models/gin/learning_rate_schedules/constant_0_001.gin
t5/models/gin/learning_rate_schedules/rsqrt_no_ramp_down.gin
t5/models/gin/models/__init__.py
t5/models/gin/models/bi_bert_base.gin
t5/models/gin/models/bi_bert_large.gin
t5/models/gin/models/bi_v1.gin
t5/models/gin/models/bi_v1_11B.gin
t5/models/gin/models/bi_v1_2x.gin
t5/models/gin/models/bi_v1_3B.gin
t5/models/gin/models/bi_v1_4x.gin
t5/models/gin/models/bi_v1_l6.gin
t5/models/gin/models/bi_v1_large.gin
t5/models/gin/models/bi_v1_shared.gin
t5/models/gin/models/bi_v1_small.gin
t5/models/gin/models/lm_v1.gin
t5/models/gin/models/lm_v1_ifa.gin
t5/models/gin/models/t5.1.0.11B.gin
t5/models/gin/models/t5.1.0.3B.gin
t5/models/gin/models/t5.1.0.base.gin
t5/models/gin/models/t5.1.0.large.gin
t5/models/gin/models/t5.1.0.small.gin
t5/models/gin/models/t5.1.1.base.gin
t5/models/gin/models/t5.1.1.large.gin
t5/models/gin/models/t5.1.1.small.gin
t5/models/gin/models/t5.1.1.tiny.gin
t5/models/gin/models/t5.1.1.xl.gin
t5/models/gin/models/t5.1.1.xxl.gin
t5/models/gin/models/t5.1.n4w10.base.gin
t5/models/gin/models/t5.1.n4w10.large.gin
t5/models/gin/models/t5.1.n4w10.xl.gin
t5/models/gin/models/t5.1.th.base.gin
t5/models/gin/models/t5.1.th.large.gin
t5/models/gin/objectives/__init__.py
t5/models/gin/objectives/all_permute.gin
t5/models/gin/objectives/denoise.gin
t5/models/gin/objectives/iid_10_u_u.gin
t5/models/gin/objectives/iid_15_d_d.gin
t5/models/gin/objectives/iid_15_m_f.gin
t5/models/gin/objectives/iid_15_r10s90_f.gin
t5/models/gin/objectives/iid_15_u_u.gin
t5/models/gin/objectives/iid_25_u_u.gin
t5/models/gin/objectives/iid_50_u_u.gin
t5/models/gin/objectives/lm.gin
t5/models/gin/objectives/prefix_lm.gin
t5/models/gin/objectives/span.gin
t5/models/gin/objectives/span_10_15_u_u.gin
t5/models/gin/objectives/span_2_15_u_u.gin
t5/models/gin/objectives/span_3_15_u_u.gin
t5/models/gin/objectives/span_5_15_u_u.gin
t5/models/gin/sequence_lengths/__init__.py
t5/models/gin/sequence_lengths/cnn_dailymail_v002.gin
t5/models/gin/sequence_lengths/default.gin
t5/models/gin/sequence_lengths/en_mix.gin
t5/models/gin/sequence_lengths/glue_v002_proportional.gin
t5/models/gin/sequence_lengths/squad_v010_allanswers.gin
t5/models/gin/sequence_lengths/super_glue_v102_proportional.gin
t5/models/gin/sequence_lengths/wmt15_enfr_v003.gin
t5/models/gin/sequence_lengths/wmt16_enro_v003.gin
t5/models/gin/sequence_lengths/wmt_t2t_ende_v003.gin
t5/models/gin/sequence_lengths/wsc_dpr_simple_proportional.gin
t5/scripts/__init__.py
t5/scripts/dump_task.py
t5/scripts/parse_tb.py
t5/scripts/prepare_glue_submission.py
t5/scripts/transform_checkpoints.py
t5/seqio/__init__.py
