# Supplementary material
Source: ML conference proceedings conference paper supplement (https://proceedings.neurips.cc/paper_files/paper/2022/hash/89379d5fc6eb34ff98488202fb52b9d0-Abstract.html)
Supplement: Supplementary file 1 [file 89379d5fc6eb34ff98488202fb52b9d0-Supplemental-Conference.zip › supplementary_material/code/run_scripts_to_reproduce_experiments/data_scripts/get_all_pretraining_and_finetuning_data_from_gcs.sh]

mkdir -p data/data_from_gcs/
gsutil -m cp -r gs://n2formal-public-data/synthetic_pretraining/* data/data_from_gcs/
