# Supplementary material
Source: ML conference proceedings conference paper supplement (https://proceedings.neurips.cc/paper_files/paper/2022/hash/89379d5fc6eb34ff98488202fb52b9d0-Abstract.html)
Supplement: Supplementary file 1 [file 89379d5fc6eb34ff98488202fb52b9d0-Supplemental-Conference.zip › supplementary_material/code/simpler_tasks_data_gen/cfg_tasks/scratch.ipynb]

# %% [code]
from nltk import CFG

%load_ext autoreload
%reload_ext autoreload
%autoreload 2
from cfg_utils import *
from generate_cfg_task_data import gen_sent_deriv_given_grammar_and_one_depth

# %% [code]
freeze_causing_rules = ["V0 -> V0 V0 't1'", 'V0 -> V0 V2', "V0 -> 't4' V1", "V2 -> 't3' 't3'", 'V2 -> V0 V2', "V2 -> 't2' 't1'", "V1 -> 't3' V0", "V0 -> 't2'", "V2 -> 't0'", "V1 -> 't1'"]
grammar = CFG.fromstring(freeze_causing_rules)
gen_sent_deriv_given_grammar_and_one_depth(grammar, 2)

# %% [code]


# %% [code]


# %% [code]

rules = sample_cfg_rules(8, 5, 5, 3)
rules

# %% [code]
rules = \
["V0 -> 't1' 't1'",
 "V0 -> 't4' 't4'"]


# %% [code]
grammar = CFG.fromstring(rules)
# print(grammar)
# print(grammar.start())
# parser = make_parser(grammar)


# %% [code]
from generate_specific_depth_sents_and_derivs import generate_specific_depth_sents_and_derivs
generate_specific_depth_sents_and_derivs(grammar, [grammar.start()], 4)

# %% [code]
from generate_specific_depth_returns import f

for sent, deriv in zip(*f(grammar, [grammar.start()], 5)):
  print('----')
  print(sent)
  print(deriv)


# %% [code]
p_rhs = grammar.productions(lhs=grammar.start())[1].rhs()
type(p_rhs)
print(p_rhs)

# %% [code]
sentence= sample_one_sentence_specific_depth(grammar, 4, 100)
print(sentence)


# %% [code]
compute_first_parse(parser, sentence)

# %% [code]
grammar = CFG.fromstring(rules)
print(grammar.start)

# %% [code]
grammar = CFG.fromstring(rules)
from nltk.parse.generate import generate
for s in generate(grammar, depth=100, n=10):
  print(s)

# %% [code]
grammar = CFG.fromstring(rules)
from generate_specific_depth import generate_specific_depth
for s in generate_specific_depth(grammar, depth=3, n=10):
    print(s)
  # break

# %% [code]
grammar = CFG.fromstring(rules)
from generate_specific_depth import generate_specific_depth
for s in generate_specific_depth(grammar, depth=5, n=10):
    print(s)
  # break

# %% [code]
grammar = CFG.fromstring(rules)
from generate_specific_depth import generate_specific_depth
for s in generate_specific_depth(grammar, depth=4, n=10):
  if 'SPECIFIC_DEPTH_REACHED' in s:
    s = list(filter(lambda a: a != 'SPECIFIC_DEPTH_REACHED', s))
    
    print(s)
  # break

# %% [code]
grammar = CFG.fromstring("""
S -> NP VP
PP -> P NP
NP -> Det N | NP PP
VP -> V NP | VP PP
Det -> 'a' | 'the'
N -> 'dog' | 'cat'
V -> 'chased' | 'sat'
P -> 'on' | 'in'
""")

# %% [code]
grammar.productions()

# %% [code]
grammar = CFG.fromstring("""
S -> 's'
S -> V1 
V1 -> 'x'V1
V1 -> 'x' 
""")

# %% [code]
print(grammar)

# %% [code]
grammar = CFG.fromstring(["S -> 's'", "S -> V1", "V1 -> 'x'V1", "V1 -> 'x'" ])
print(grammar)

# %% [code]
from nltk.parse.generate import generate
for s in generate(grammar, depth=5):
  print(s)


# %% [code]
grammar.max_len()

# %% [code]
dir(grammar)

# %% [code]
