# Supplementary material
Source: ML conference proceedings conference paper supplement (https://proceedings.neurips.cc/paper_files/paper/2022/hash/89379d5fc6eb34ff98488202fb52b9d0-Abstract.html)
Supplement: Supplementary file 1 [file 89379d5fc6eb34ff98488202fb52b9d0-Supplemental-Conference.zip › supplementary_material/code/simpler_tasks_data_gen/cfg_tasks/scratch_2.ipynb]

# %% [code]

import seqio
DEFAULT_SPM_PATH = "gs://t5-data/vocabs/cc_all.32000/sentencepiece.model"  # GCS
DEFAULT_EXTRA_IDS = 100
VOCABULARY = seqio.SentencePieceVocabulary(DEFAULT_SPM_PATH, DEFAULT_EXTRA_IDS)
TOKENIZER = VOCABULARY.tokenizer


# %% [markdown]


# %% [code]
import sys
sys.path.append('/Users/felix/Documents/research/Universal_LIME/')
from tasks_with_tokens import T5_TOKEN_IDS_FOR_TASKS, EXTRA_IDS


# %% [code]
len(T5_TOKEN_IDS_FOR_TASKS)

# %% [code]
len(EXTRA_IDS)

# %% [code]
print(sorted(list(T5_TOKEN_IDS_FOR_TASKS), reverse=True))

# %% [code]
print(sorted(list(EXTRA_IDS)))

# %% [code]
len(TOKENIZER)

# %% [code]
