# Supplementary material
Source: ML conference proceedings conference paper supplement (https://proceedings.neurips.cc/paper_files/paper/2022/hash/89379d5fc6eb34ff98488202fb52b9d0-Abstract.html)
Supplement: Supplementary file 1 [file 89379d5fc6eb34ff98488202fb52b9d0-Supplemental-Conference.zip › supplementary_material/code/simpler_tasks_data_gen/data_scripts/1M_1_23_unary/get_data.sh]

parent_folder=$(basename $(dirname "$0"))
gsutil -m cp -r gs://n2formal-community-external-lime/universal_lime/synthetic_tasks_data/$parent_folder /mnt/disks/persist/felix-text-to-text-transfer-transformer/synthetic_tasks_data/


# gsutil -m cp -r gs://n2formal-community-external-lime/universal_lime/synthetic_tasks_data/1M_1_23_unary/length/ /mnt/disks/persist/felix-text-to-text-transfer-transformer/synthetic_tasks_data/1M_1_23_unary/

# /mnt/disks/persist/quantum_datagen_2/generated_data/2-20/2x2-6/all_gen_data.json

# gsutil -m cp -r /mnt/disks/persist/quantum_datagen_2/generated_data/2-20/2x2-6/all_gen_data.json gs://n2formal-community-external-lime/quantum/tmp/


# gsutil cp -r gs://n2formal-community-external-lime/quantum/tmp/all*data.json /Users/felix/Documents/research/data_for_ben
