# Supplementary material
Source: ML conference proceedings conference paper supplement (https://proceedings.neurips.cc/paper_files/paper/2022/hash/89379d5fc6eb34ff98488202fb52b9d0-Abstract.html)
Supplement: Supplementary file 1 [file 89379d5fc6eb34ff98488202fb52b9d0-Supplemental-Conference.zip › supplementary_material/code/simpler_tasks_data_gen/data_scripts/11-29/save_data_to_gcs.sh]

#!/bin/bash 
gsutil cp -r /mnt/disks/persist/Universal_LIME/flax_data/ gs://n2formal-community-external-lime/universal_lime/
