# Supplementary material
Source: ML conference proceedings conference paper supplement (https://proceedings.neurips.cc/paper_files/paper/2022/hash/89379d5fc6eb34ff98488202fb52b9d0-Abstract.html)
Supplement: Supplementary file 1 [file 89379d5fc6eb34ff98488202fb52b9d0-Supplemental-Conference.zip › supplementary_material/code/simpler_tasks_data_gen/data_scripts/11-29/split_all_data_train_val.py]

import glob
import os

files_to_split_train_val = glob.glob('./data/11-29/*/deduped*')
train_count = 1_000_000
valid_count = 4_000
for path in files_to_split_train_val:
  os.system(f'python data_scripts/split_data_train_val.py --data_path {path} --train_count {train_count} --valid_count {valid_count}')
