# Supplementary material
Source: ML conference proceedings conference paper supplement (https://proceedings.neurips.cc/paper_files/paper/2022/hash/89379d5fc6eb34ff98488202fb52b9d0-Abstract.html)
Supplement: Supplementary file 1 [file 89379d5fc6eb34ff98488202fb52b9d0-Supplemental-Conference.zip › supplementary_material/code/simpler_tasks_data_gen/data_scripts/copy_data_from_gcs_to_target_loc.sh]

gsutil -m cp -r gs://n2formal-community-external-lime/universal_lime/synthetic_tasks_data/$1 \
$2


#gsutil -m rm -r gs://n2formal-community-external-lime/universal_lime/synthetic_tasks_data/1-11_t5_token_basic_unary_tasks


#gsutil -m cp -r gs://n2formal-community-external-lime/universal_lime/synthetic_tasks_data/1-11_t5_token_basic_unary_tasks /mnt/disks/persist/felix-text-to-text-transfer-transformer/synthetic_tasks_data/
