# Supplementary material
Source: ML conference proceedings conference paper supplement (https://proceedings.neurips.cc/paper_files/paper/2022/hash/89379d5fc6eb34ff98488202fb52b9d0-Abstract.html)
Supplement: Supplementary file 1 [file 89379d5fc6eb34ff98488202fb52b9d0-Supplemental-Conference.zip › supplementary_material/code/simpler_tasks_data_gen/data_scripts/save_data_to_gcs.sh]

#!/bin/bash 

gsutil rm -rf gs://n2formal-community-external-lime/universal_lime/synthetic_tasks_data/$1/
gsutil -m cp -r /mnt/disks/persist/Universal_LIME/data/$1/ gs://n2formal-community-external-lime/universal_lime/synthetic_tasks_data/
# gsutil -m cp -r /mnt/disks/persist/Universal_LIME/data/$1/ gs://n2formal-community-external-lime/universal_lime/synthetic_tasks_data/


# gs://n2formal-community-external-lime/universal_lime/synthetic_tasks_data/1-11_t5_token_basic_unary_tasks
