# Supplementary material
Source: ML conference proceedings conference paper supplement (https://proceedings.neurips.cc/paper_files/paper/2022/hash/89379d5fc6eb34ff98488202fb52b9d0-Abstract.html)
Supplement: Supplementary file 1 [file 89379d5fc6eb34ff98488202fb52b9d0-Supplemental-Conference.zip › supplementary_material/code/simpler_tasks_data_gen/data_scripts/std_exps_1M_set_run1/get_data.sh]

parent_folder=$(basename $(dirname "$0"))

rm -rf /mnt/disks/persist/felix-text-to-text-transfer-transformer/synthetic_tasks_data/$parent_folder

gsutil -m cp -r gs://n2formal-community-external-lime/universal_lime/synthetic_tasks_data/$parent_folder /mnt/disks/persist/felix-text-to-text-transfer-transformer/synthetic_tasks_data/
