# Supplementary material
Source: ML conference proceedings conference paper supplement (https://proceedings.neurips.cc/paper_files/paper/2022/hash/89379d5fc6eb34ff98488202fb52b9d0-Abstract.html)
Supplement: Supplementary file 1 [file 89379d5fc6eb34ff98488202fb52b9d0-Supplemental-Conference.zip › supplementary_material/code/simpler_tasks_data_gen/examples_basic.ipynb]

# %% [code]
%load_ext autoreload
%reload_ext autoreload
%autoreload 2
from IPython.core.display import display, HTML
display(HTML("<style>.container { width:100% !important; }</style>"))
import json
import pandas as pd
import numpy as np
from prototypical_tasks import *
from prototypical_tasks import _data_to_str, _str_to_data


def show_sample_examples(func, num_examples=10, length_range=(2, 30), char_set=UPPER_AND_LOWER_LETTERS):
    for _ in range(num_examples):
        print(func(length_range=length_range, char_set=char_set))
        
BASIC_TASKS = ['copy', 'reverse', 'set', 'first_char', 'last_char', 'deduplicate', 'length', 
       'longest_word', 'duplicate', 'count', 'delete', 'filter', 
       'get_index', 'search', 'sort', 'replace', 'replace_many', 'union', 'intersect', 'set_1_minus_2', 'set_2_minus_1']


def show_task_examples(task, is_natural_language=False, num_examples=10):
    for count in range(num_examples):
        
        basic_task_sampling_args = {'length_range': (4,30), 'char_set':UPPER_AND_LOWER_LETTERS}
        example = generate_example(TASK_REGISTRY[task], is_natural_language=is_natural_language, **basic_task_sampling_args)
        if count % 100_000==0:
            print(count)
        if task == 'longest_word':
            print(f'@input = {example[0]}')
            print(f'output = {example[1]}')
        else:
            print(example)
#             if len(example[1]) == 0 or example[1].isspace():
#                 print(example[1])
#                 raise RuntimeError()

for task in BASIC_TASKS:
# for task in ['get_index']:
    print(f'\n{task}')
    show_task_examples(task, num_examples=20)

# %% [code]
T.encode('yes')

# %% [code]
len('   ')

# %% [code]
'    '.isspace()

# %% [code]
for func in SAMPLING_FUNCTIONS:
    print(f'\n{func.__name__}')
    show_sample_examples(func, 10)

# %% [code]
# for task in BASIC_TASKS:
for task in ['replace_many']:
    print(f'\n{task}')
    show_task_examples(task, num_examples=2)

# %% [code]
from prototypical_tasks import deduplicate
deduplicate('h h h')

# %% [code]
deduplicate('v d V V r q v d V r q')

# %% [code]
from prototypical_tasks import generate_batch_examples
for task in ["deduplicate"]:
    generate_batch_examples(task=TASK_REGISTRY[task], num_examples=1_000_000, is_natural_language=False, task_config_str="count2_30", length_range=(2, 30), char_set=UPPER_AND_LOWER_LETTERS)


# %% [code]
for task in ["deduplicate"]:
    generate_batch_examples(task=TASK_REGISTRY[task], num_examples=50, is_natural_language=False, task_config_str="count2_30", length_range=(2, 30), char_set=UPPER_AND_LOWER_LETTERS)


# %% [code]
with open('lime_datasets/deduplicate/count2_30_0M.txt', 'r') as f:
    for c, l in enumerate(f):
        print(c)
        print(l[:-1])
        print(l[:-1].replace('\t', '____________________'))


# %% [code]
