# Supplementary material
Source: ML conference proceedings conference paper supplement (https://proceedings.neurips.cc/paper_files/paper/2022/hash/89379d5fc6eb34ff98488202fb52b9d0-Abstract.html)
Supplement: Supplementary file 1 [file 89379d5fc6eb34ff98488202fb52b9d0-Supplemental-Conference.zip › supplementary_material/code/simpler_tasks_data_gen/examples_lime.ipynb]

# %% [code]
%load_ext autoreload
%reload_ext autoreload
%autoreload 2
from IPython.core.display import display, HTML
display(HTML("<style>.container { width:100% !important; }</style>"))

# %% [code]
import json
import pandas as pd
import numpy as np
from tasks_with_tokens import *

# %% [markdown]
# params

* ## length_range
    * Does not affect actual data sampling. Code just resamples until it gets data whose input has number of nonspace chars within length_range[0] and length_range[1] inclusive.
    * Example: if length_range = (1,512), no generated data will be greater than 512 
* ## ida_num_chars_range, ida_pattern_length_range
    * ![image-2.png](attachment:image-2.png)
* ## char_set, is_original_vocab_division, num_upper_case_letters, num_lower_case_letters, num_math_symbols
    * ![image-4.png](attachment:image-4.png)

# %% [code]
replace_string_lst1_words_with_lst2_words('12312343433323saasasadasdas', ['1','3'], ['8','9'])

# %% [code]
TOKENIZER.decode(32000)

# %% [code]
print(EXTRA_IDS)

# %% [code]
dir(T)

# %% [code]
T.eos_id()

# %% [code]
LIME_TASKS = ['lime_induct', 'lime_deduct', 'lime_abduct']
T = TOKENIZER

def show_task_examples(task, num_examples=10):
    lime_sampling_args = {'length_range':(0, 220), 'char_set':list(T5_TOKEN_IDS_FOR_TASKS),'is_original_vocab_division': True,
                      'ida_num_chars_range':None, 'ida_pattern_length_range':None, 
                      'num_upper_case_letters':None, 'num_lower_case_letters':None, 'num_math_symbols':None}
    for _ in range(num_examples):
        example = generate_example(TASK_REGISTRY[task], is_natural_language=False, **lime_sampling_args)
        print("-----")

        print(example)
#         print(eval(example[0]))
#         print(f"input decoded: {T.decode_pieces(eval(example[0]))}")

#         print(f"output decoded: {T.decode_pieces(eval(example[1]))}")


for task in LIME_TASKS:
    print(f'\n{task}')
    show_task_examples(task, num_examples=10)

# %% [code]
T.decode_pieces(['31902', '19632'])

# %% [code]
input.split(' ')

# %% [code]
x = [521, 8900, 521, 15083, 25513, 10673, 25904, 15438, 11173, 15438, 15438, 15438, 4199, 16339, 15438, 13692, 13692, 11173, 15943]

# %% [code]
T.encode_as_pieces(x)

# %% [code]
