# Supplementary material
Source: ML conference proceedings conference paper supplement (https://proceedings.neurips.cc/paper_files/paper/2022/hash/89379d5fc6eb34ff98488202fb52b9d0-Abstract.html)
Supplement: Supplementary file 1 [file 89379d5fc6eb34ff98488202fb52b9d0-Supplemental-Conference.zip › supplementary_material/code/simpler_tasks_data_gen/examples_mbpp.ipynb]

# %% [code]
%load_ext autoreload
%reload_ext autoreload
%autoreload 2
from IPython.core.display import display, HTML
display(HTML("<style>.container { width:100% !important; }</style>"))
import json
import pandas as pd
import numpy as np
from prototypical_tasks import *
from prototypical_tasks import _data_to_str, _str_to_data
from prototypical_tasks import UPPER_AND_LOWER_LETTERS

# %% [code]
from prototypical_tasks import MBPP_TASKS

def show_task_examples(task, num_examples=10, is_print=False):
    mbpp_sampling_args = {'length_range': (1,512), 'char_set':UPPER_AND_LOWER_LETTERS}
    for _ in range(num_examples):
        example = generate_example(TASK_REGISTRY[task], is_natural_language=False, **mbpp_sampling_args)
        if is_print:
            print('----')
            print('INPUT')
            print(example[0])
            print('OUTPUT')
            print(example[1])


for task in MBPP_TASKS:
    print('\n\n================')
    print(f'\n{task}')
#     is_print = True if task=='rearange_string' else False
    show_task_examples(task, num_examples=7, is_print=True)

# %% [code]
