# Supplementary material
Source: ML conference proceedings conference paper supplement (https://proceedings.neurips.cc/paper_files/paper/2022/hash/89379d5fc6eb34ff98488202fb52b9d0-Abstract.html)
Supplement: Supplementary file 1 [file 89379d5fc6eb34ff98488202fb52b9d0-Supplemental-Conference.zip › supplementary_material/code/simpler_tasks_data_gen/examples_summarization.ipynb]

# %% [code]
%load_ext autoreload
%reload_ext autoreload
%autoreload 2
from IPython.core.display import display, HTML
display(HTML("<style>.container { width:100% !important; }</style>"))
import json
import pandas as pd
import numpy as np
from prototypical_tasks import *
from prototypical_tasks import _data_to_str, _str_to_data
from prototypical_tasks import UPPER_AND_LOWER_LETTERS

# %% [markdown]
# params
* Original paper code data gen params: 
    * mean_numsents=10 -> "sampling uniformly from 7 to 13 sentences"
    * mean_sentlen=10 -> "sampling uniformly from 5 to 15 words" 
* My code additional params
    * length_range
        * Does not affect actual data sampling. Code just resamples until it gets data whose input has number of nonspace chars within length_range[0] and length_range[1] inclusive.
        * Example: if length_range = (1,512), no generated data will be greater than 512 
    * vocab_size, chars_per_word, char_set
        * In original paper code, sentences consist of words from vocabulary of size (vocab_size=5000) with (chars_per_word=3) chars per word. The vocabulary is: "first 5000 3-letter character combinations using the English alphabet in lexical order starting from the right (aaa, baa, caa, ..., aab, bab, ...)"
        * char_set = possible chars that words could consist of. 
        * In original paper code, words consist of lower case letters only
    * In my code, if vocab_size chars_per_word and char_set are all not None, then the data is such that:
        * Sentences consist of words from vocabulary of size (vocab_size) with (chars_per_word) chars per word
        * Each word in the vocabulary is  made by randomly sampling chars from char_set


# %% [code]
from prototypical_tasks import SUMMARIZATION_TASKS

def show_task_examples(task, num_examples=10):
    summ_sampling_args = {'length_range': (1,512), 'char_set':UPPER_AND_LOWER_LETTERS, 'vocab_size':5000, 
                          'num_chars_per_word':3, 'mean_numsents':10, 'mean_sentlen':10}
    for _ in range(num_examples):
        example = generate_example(TASK_REGISTRY[task], is_natural_language=False, **summ_sampling_args)
        print('----')
        print('INPUT')
        print(example[0])
        print('OUTPUT')
        print(example[1])


for task in SUMMARIZATION_TASKS:
    print('\n\n================')
    print(f'\n{task}')
    show_task_examples(task, num_examples=5)

# %% [code]
