# Supplementary material
Source: ML conference proceedings conference paper supplement (https://proceedings.neurips.cc/paper_files/paper/2022/hash/89379d5fc6eb34ff98488202fb52b9d0-Abstract.html)
Supplement: Supplementary file 1 [file 89379d5fc6eb34ff98488202fb52b9d0-Supplemental-Conference.zip › supplementary_material/code/simpler_tasks_data_gen/lime_datagen/generate.sh]

python lime_datagen/generate_data.py --root lime_datagen/data --num_train=20 --num_test 10 --mode induct deduct abduct --vocab_size 68
