# Supplementary material
Source: ML conference proceedings conference paper supplement (https://proceedings.neurips.cc/paper_files/paper/2022/hash/89379d5fc6eb34ff98488202fb52b9d0-Abstract.html)
Supplement: Supplementary file 1 [file 89379d5fc6eb34ff98488202fb52b9d0-Supplemental-Conference.zip › supplementary_material/code/simpler_tasks_data_gen/mbpp.jsonl]

{"text": "Write a function to find the minimum cost path to reach (m, n) from (0, 0) for the given cost matrix cost[][] and a position (m, n) in cost[][].", "code": "R = 3\r\nC = 3\r\ndef min_cost(cost, m, n): \r\n\ttc = [[0 for x in range(C)] for x in range(R)] \r\n\ttc[0][0] = cost[0][0] \r\n\tfor i in range(1, m+1): \r\n\t\ttc[i][0] = tc[i-1][0] + cost[i][0] \r\n\tfor j in range(1, n+1): \r\n\t\ttc[0][j] = tc[0][j-1] + cost[0][j] \r\n\tfor i in range(1, m+1): \r\n\t\tfor j in range(1, n+1): \r\n\t\t\ttc[i][j] = min(tc[i-1][j-1], tc[i-1][j], tc[i][j-1]) + cost[i][j] \r\n\treturn tc[m][n]", "task_id": 1, "test_setup_code": "", "test_list": ["assert min_cost([[1, 2, 3], [4, 8, 2], [1, 5, 3]], 2, 2) == 8", "assert min_cost([[2, 3, 4], [5, 9, 3], [2, 6, 4]], 2, 2) == 12", "assert min_cost([[3, 4, 5], [6, 10, 4], [3, 7, 5]], 2, 2) == 16"], "challenge_test_list": []}
{"text": "Write a function to find the similar elements from the given two tuple lists.", "code": "def similar_elements(test_tup1, test_tup2):\r\n  res = tuple(set(test_tup1) & set(test_tup2))\r\n  return (res) ", "task_id": 2, "test_setup_code": "", "test_list": ["assert similar_elements((3, 4, 5, 6),(5, 7, 4, 10)) == (4, 5)", "assert similar_elements((1, 2, 3, 4),(5, 4, 3, 7)) == (3, 4)", "assert similar_elements((11, 12, 14, 13),(17, 15, 14, 13)) == (13, 14)"], "challenge_test_list": []}
{"text": "Write a python function to identify non-prime numbers.", "code": "import math\r\ndef is_not_prime(n):\r\n    result = False\r\n    for i in range(2,int(math.sqrt(n)) + 1):\r\n        if n % i == 0:\r\n            result = True\r\n    return result", "task_id": 3, "test_setup_code": "", "test_list": ["assert is_not_prime(2) == False", "assert is_not_prime(10) == True", "assert is_not_prime(35) == True"], "challenge_test_list": []}
{"text": "Write a function to find the largest integers from a given list of numbers using heap queue algorithm.", "code": "import heapq as hq\r\ndef heap_queue_largest(nums,n):\r\n  largest_nums = hq.nlargest(n, nums)\r\n  return largest_nums", "task_id": 4, "test_setup_code": "", "test_list": ["assert heap_queue_largest( [25, 35, 22, 85, 14, 65, 75, 22, 58],3)==[85, 75, 65] ", "assert heap_queue_largest( [25, 35, 22, 85, 14, 65, 75, 22, 58],2)==[85, 75] ", "assert heap_queue_largest( [25, 35, 22, 85, 14, 65, 75, 22, 58],5)==[85, 75, 65, 58, 35]"], "challenge_test_list": []}
{"text": "Write a function to find the number of ways to fill it with 2 x 1 dominoes for the given 3 x n board.", "code": "def count_ways(n): \r\n\tA = [0] * (n + 1) \r\n\tB = [0] * (n + 1) \r\n\tA[0] = 1\r\n\tA[1] = 0\r\n\tB[0] = 0\r\n\tB[1] = 1\r\n\tfor i in range(2, n+1): \r\n\t\tA[i] = A[i - 2] + 2 * B[i - 1] \r\n\t\tB[i] = A[i - 1] + B[i - 2] \r\n\treturn A[n] ", "task_id": 5, "test_setup_code": "", "test_list": ["assert count_ways(2) == 3", "assert count_ways(8) == 153", "assert count_ways(12) == 2131"], "challenge_test_list": []}
{"text": "Write a python function to check whether the two numbers differ at one bit position only or not.", "code": "def is_Power_Of_Two (x): \r\n    return x and (not(x & (x - 1))) \r\ndef differ_At_One_Bit_Pos(a,b): \r\n    return is_Power_Of_Two(a ^ b)", "task_id": 6, "test_setup_code": "", "test_list": ["assert differ_At_One_Bit_Pos(13,9) == True", "assert differ_At_One_Bit_Pos(15,8) == False", "assert differ_At_One_Bit_Pos(2,4) == False"], "challenge_test_list": []}
{"text": "Write a function to find all words which are at least 4 characters long in a string by using regex.", "code": "import re\r\ndef find_char_long(text):\r\n  return (re.findall(r\"\\b\\w{4,}\\b\", text))", "task_id": 7, "test_setup_code": "", "test_list": ["assert find_char_long('Please move back to stream') == ['Please', 'move', 'back', 'stream']", "assert find_char_long('Jing Eco and Tech') == ['Jing', 'Tech']", "assert find_char_long('Jhingai wulu road Zone 3') == ['Jhingai', 'wulu', 'road', 'Zone']"], "challenge_test_list": []}
{"text": "Write a function to find squares of individual elements in a list using lambda function.", "code": "def square_nums(nums):\r\n square_nums = list(map(lambda x: x ** 2, nums))\r\n return square_nums", "task_id": 8, "test_setup_code": "", "test_list": ["assert square_nums([1, 2, 3, 4, 5, 6, 7, 8, 9, 10])==[1, 4, 9, 16, 25, 36, 49, 64, 81, 100]", "assert square_nums([10,20,30])==([100,400,900])", "assert square_nums([12,15])==([144,225])"], "challenge_test_list": []}
{"text": "Write a python function to find the minimum number of rotations required to get the same string.", "code": "def find_Rotations(str): \r\n    tmp = str + str\r\n    n = len(str) \r\n    for i in range(1,n + 1): \r\n        substring = tmp[i: i+n] \r\n        if (str == substring): \r\n            return i \r\n    return n ", "task_id": 9, "test_setup_code": "", "test_list": ["assert find_Rotations(\"aaaa\") == 1", "assert find_Rotations(\"ab\") == 2", "assert find_Rotations(\"abc\") == 3"], "challenge_test_list": []}
{"text": "Write a function to get the n smallest items from a dataset.", "code": "import heapq\r\ndef small_nnum(list1,n):\r\n  smallest=heapq.nsmallest(n,list1)\r\n  return smallest", "task_id": 10, "test_setup_code": "", "test_list": ["assert small_nnum([10, 20, 50, 70, 90, 20, 50, 40, 60, 80, 100],2)==[10,20]", "assert small_nnum([10, 20, 50, 70, 90, 20, 50, 40, 60, 80, 100],5)==[10,20,20,40,50]", "assert small_nnum([10, 20, 50, 70, 90, 20, 50, 40, 60, 80, 100],3)==[10,20,20]"], "challenge_test_list": []}
{"text": "Write a python function to remove first and last occurrence of a given character from the string.", "code": "def remove_Occ(s,ch): \r\n    for i in range(len(s)): \r\n        if (s[i] == ch): \r\n            s = s[0 : i] + s[i + 1:] \r\n            break\r\n    for i in range(len(s) - 1,-1,-1):  \r\n        if (s[i] == ch): \r\n            s = s[0 : i] + s[i + 1:] \r\n            break\r\n    return s ", "task_id": 11, "test_setup_code": "", "test_list": ["assert remove_Occ(\"hello\",\"l\") == \"heo\"", "assert remove_Occ(\"abcda\",\"a\") == \"bcd\"", "assert remove_Occ(\"PHP\",\"P\") == \"H\""], "challenge_test_list": ["assert remove_Occ(\"hellolloll\",\"l\") == \"helollol\"", "assert remove_Occ(\"\",\"l\") == \"\""]}
{"text": "Write a function to sort a given matrix in ascending order according to the sum of its rows.", "code": "def sort_matrix(M):\r\n    result = sorted(M, key=sum)\r\n    return result", "task_id": 12, "test_setup_code": "", "test_list": ["assert sort_matrix([[1, 2, 3], [2, 4, 5], [1, 1, 1]])==[[1, 1, 1], [1, 2, 3], [2, 4, 5]]", "assert sort_matrix([[1, 2, 3], [-2, 4, -5], [1, -1, 1]])==[[-2, 4, -5], [1, -1, 1], [1, 2, 3]]", "assert sort_matrix([[5,8,9],[6,4,3],[2,1,4]])==[[2, 1, 4], [6, 4, 3], [5, 8, 9]]"], "challenge_test_list": []}
{"text": "Write a function to count the most common words in a dictionary.", "code": "from collections import Counter\r\ndef count_common(words):\r\n  word_counts = Counter(words)\r\n  top_four = word_counts.most_common(4)\r\n  return (top_four)\r\n", "task_id": 13, "test_setup_code": "", "test_list": ["assert count_common(['red','green','black','pink','black','white','black','eyes','white','black','orange','pink','pink','red','red','white','orange','white',\"black\",'pink','green','green','pink','green','pink','white','orange',\"orange\",'red']) == [('pink', 6), ('black', 5), ('white', 5), ('red', 4)]", "assert count_common(['one', 'two', 'three', 'four', 'five', 'one', 'two', 'one', 'three', 'one']) == [('one', 4), ('two', 2), ('three', 2), ('four', 1)]", "assert count_common(['Facebook', 'Apple', 'Amazon', 'Netflix', 'Google', 'Apple', 'Netflix', 'Amazon']) == [('Apple', 2), ('Amazon', 2), ('Netflix', 2), ('Facebook', 1)]"], "challenge_test_list": []}
{"text": "Write a python function to find the volume of a triangular prism.", "code": "def find_Volume(l,b,h) : \r\n    return ((l * b * h) / 2) ", "task_id": 14, "test_setup_code": "", "test_list": ["assert find_Volume(10,8,6) == 240", "assert find_Volume(3,2,2) == 6", "assert find_Volume(1,2,1) == 1"], "challenge_test_list": []}
{"text": "Write a function to split a string at lowercase letters.", "code": "import re\r\ndef split_lowerstring(text):\r\n return (re.findall('[a-z][^a-z]*', text))", "task_id": 15, "test_setup_code": "", "test_list": ["assert split_lowerstring(\"AbCd\")==['bC','d']", "assert split_lowerstring(\"Python\")==['y', 't', 'h', 'o', 'n']", "assert split_lowerstring(\"Programming\")==['r', 'o', 'g', 'r', 'a', 'm', 'm', 'i', 'n', 'g']"], "challenge_test_list": []}
{"text": "Write a function to find sequences of lowercase letters joined with an underscore.", "code": "import re\r\ndef text_lowercase_underscore(text):\r\n        patterns = '^[a-z]+_[a-z]+$'\r\n        if re.search(patterns,  text):\r\n                return 'Found a match!'\r\n        else:\r\n                return('Not matched!')", "task_id": 16, "test_setup_code": "", "test_list": ["assert text_lowercase_underscore(\"aab_cbbbc\")==('Found a match!')", "assert text_lowercase_underscore(\"aab_Abbbc\")==('Not matched!')", "assert text_lowercase_underscore(\"Aaab_abbbc\")==('Not matched!')"], "challenge_test_list": ["assert text_lowercase_underscore(\"aab-cbbbc\")==('Not matched!')"]}
{"text": "Write a function to find the perimeter of a square.", "code": "def square_perimeter(a):\r\n  perimeter=4*a\r\n  return perimeter", "task_id": 17, "test_setup_code": "", "test_list": ["assert square_perimeter(10)==40", "assert square_perimeter(5)==20", "assert square_perimeter(4)==16"], "challenge_test_list": []}
{"text": "Write a function to remove characters from the first string which are present in the second string.", "code": "NO_OF_CHARS = 256\r\ndef str_to_list(string): \r\n\ttemp = [] \r\n\tfor x in string: \r\n\t\ttemp.append(x) \r\n\treturn temp \r\ndef lst_to_string(List): \r\n\treturn ''.join(List) \r\ndef get_char_count_array(string): \r\n\tcount = [0] * NO_OF_CHARS \r\n\tfor i in string: \r\n\t\tcount[ord(i)] += 1\r\n\treturn count \r\ndef remove_dirty_chars(string, second_string): \r\n\tcount = get_char_count_array(second_string) \r\n\tip_ind = 0\r\n\tres_ind = 0\r\n\ttemp = '' \r\n\tstr_list = str_to_list(string) \r\n\twhile ip_ind != len(str_list): \r\n\t\ttemp = str_list[ip_ind] \r\n\t\tif count[ord(temp)] == 0: \r\n\t\t\tstr_list[res_ind] = str_list[ip_ind] \r\n\t\t\tres_ind += 1\r\n\t\tip_ind+=1\r\n\treturn lst_to_string(str_list[0:res_ind]) ", "task_id": 18, "test_setup_code": "", "test_list": ["assert remove_dirty_chars(\"probasscurve\", \"pros\") == 'bacuve'", "assert remove_dirty_chars(\"digitalindia\", \"talent\") == 'digiidi'", "assert remove_dirty_chars(\"exoticmiles\", \"toxic\") == 'emles' "], "challenge_test_list": []}
{"text": "Write a function to find whether a given array of integers contains any duplicate element.", "code": "def test_duplicate(arraynums):\r\n    nums_set = set(arraynums)    \r\n    return len(arraynums) != len(nums_set)     ", "task_id": 19, "test_setup_code": "", "test_list": ["assert test_duplicate(([1,2,3,4,5]))==False", "assert test_duplicate(([1,2,3,4, 4]))==True", "assert test_duplicate([1,1,2,2,3,3,4,4,5])==True"], "challenge_test_list": []}
{"text": "Write a function to check if the given number is woodball or not.", "code": "def is_woodall(x): \r\n\tif (x % 2 == 0): \r\n\t\treturn False\r\n\tif (x == 1): \r\n\t\treturn True\r\n\tx = x + 1 \r\n\tp = 0\r\n\twhile (x % 2 == 0): \r\n\t\tx = x/2\r\n\t\tp = p + 1\r\n\t\tif (p == x): \r\n\t\t\treturn True\r\n\treturn False", "task_id": 20, "test_setup_code": "", "test_list": ["assert is_woodall(383) == True", "assert is_woodall(254) == False", "assert is_woodall(200) == False"], "challenge_test_list": ["assert is_woodall(32212254719) == True", "assert is_woodall(32212254718) == False", "assert is_woodall(159) == True"]}
{"text": "Write a function to find m number of multiples of n.", "code": "def multiples_of_num(m,n): \r\n    multiples_of_num= list(range(n,(m+1)*n, n)) \r\n    return list(multiples_of_num)", "task_id": 21, "test_setup_code": "", "test_list": ["assert multiples_of_num(4,3)== [3,6,9,12]", "assert multiples_of_num(2,5)== [5,10]", "assert multiples_of_num(9,2)== [2,4,6,8,10,12,14,16,18]"], "challenge_test_list": []}
{"text": "Write a function to find the first duplicate element in a given array of integers.", "code": "def find_first_duplicate(nums):\r\n    num_set = set()\r\n    no_duplicate = -1\r\n\r\n    for i in range(len(nums)):\r\n\r\n        if nums[i] in num_set:\r\n            return nums[i]\r\n        else:\r\n            num_set.add(nums[i])\r\n\r\n    return no_duplicate", "task_id": 22, "test_setup_code": "", "test_list": ["assert find_first_duplicate(([1, 2, 3, 4, 4, 5]))==4", "assert find_first_duplicate([1, 2, 3, 4])==-1", "assert find_first_duplicate([1, 1, 2, 3, 3, 2, 2])==1"], "challenge_test_list": []}
{"text": "Write a python function to find the maximum sum of elements of list in a list of lists.", "code": "def maximum_Sum(list1): \r\n    maxi = -100000\r\n    for x in list1: \r\n        sum = 0 \r\n        for y in x: \r\n            sum+= y      \r\n        maxi = max(sum,maxi)     \r\n    return maxi ", "task_id": 23, "test_setup_code": "", "test_list": ["assert maximum_Sum([[1,2,3],[4,5,6],[10,11,12],[7,8,9]]) == 33", "assert maximum_Sum([[0,1,1],[1,1,2],[3,2,1]]) == 6", "assert maximum_Sum([[0,1,3],[1,2,1],[9,8,2],[0,1,0],[6,4,8]]) == 19"], "challenge_test_list": ["assert maximum_Sum([[0,-1,-1],[-1,-1,-2],[-3,-2,-1]]) == -2"]}
{"text": "Write a function to convert the given binary number to its decimal equivalent.", "code": "def binary_to_decimal(binary): \r\n    binary1 = binary \r\n    decimal, i, n = 0, 0, 0\r\n    while(binary != 0): \r\n        dec = binary % 10\r\n        decimal = decimal + dec * pow(2, i) \r\n        binary = binary//10\r\n        i += 1\r\n    return (decimal)", "task_id": 24, "test_setup_code": "", "test_list": ["assert binary_to_decimal(100) == 4", "assert binary_to_decimal(1011) == 11", "assert binary_to_decimal(1101101) == 109"], "challenge_test_list": []}
{"text": "Write a python function to find the product of non-repeated elements in a given array.", "code": "def find_Product(arr,n): \r\n    arr.sort() \r\n    prod = 1\r\n    for i in range(0,n,1): \r\n        if (arr[i - 1] != arr[i]): \r\n            prod = prod * arr[i] \r\n    return prod; ", "task_id": 25, "test_setup_code": "", "test_list": ["assert find_Product([1,1,2,3],4) == 6", "assert find_Product([1,2,3,1,1],5) == 6", "assert find_Product([1,1,4,5,6],5) == 120"], "challenge_test_list": ["assert find_Product([1,1,4,5,6,5,7,1,1,3,4],11) == 2520"]}
{"text": "Write a function to check if the given tuple list has all k elements.", "code": "def check_k_elements(test_list, K):\r\n  res = True\r\n  for tup in test_list:\r\n    for ele in tup:\r\n      if ele != K:\r\n        res = False\r\n  return (res) ", "task_id": 26, "test_setup_code": "", "test_list": ["assert check_k_elements([(4, 4), (4, 4, 4), (4, 4), (4, 4, 4, 4), (4, )], 4) == True", "assert check_k_elements([(7, 7, 7), (7, 7)], 7) == True", "assert check_k_elements([(9, 9), (9, 9, 9, 9)], 7) == False"], "challenge_test_list": ["assert check_k_elements([(4, 4), (4, 4, 4), (4, 4), (4, 4, 6, 4), (4, )], 4) == False"]}
{"text": "Write a python function to remove all digits from a list of strings.", "code": "import re  \r\ndef remove(list): \r\n    pattern = '[0-9]'\r\n    list = [re.sub(pattern, '', i) for i in list] \r\n    return list", "task_id": 27, "test_setup_code": "", "test_list": ["assert remove(['4words', '3letters', '4digits']) == ['words', 'letters', 'digits']", "assert remove(['28Jan','12Jan','11Jan']) == ['Jan','Jan','Jan']", "assert remove(['wonder1','wonder2','wonder3']) == ['wonder','wonder','wonder']"], "challenge_test_list": []}
{"text": "Write a python function to find binomial co-efficient.", "code": "def binomial_Coeff(n,k): \r\n    if k > n : \r\n       return 0\r\n    if k==0 or k ==n : \r\n        return 1 \r\n    return binomial_Coeff(n-1,k-1) + binomial_Coeff(n-1,k) ", "task_id": 28, "test_setup_code": "", "test_list": ["assert binomial_Coeff(5,2) == 10", "assert binomial_Coeff(4,3) == 4", "assert binomial_Coeff(3,2) == 3"], "challenge_test_list": ["assert binomial_Coeff(14,6) == 3003"]}
{"text": "Write a python function to find the element occurring odd number of times.", "code": "def get_Odd_Occurrence(arr,arr_size):   \r\n    for i in range(0,arr_size): \r\n        count = 0\r\n        for j in range(0,arr_size): \r\n            if arr[i] == arr[j]: \r\n                count+=1     \r\n        if (count % 2 != 0): \r\n            return arr[i]     \r\n    return -1", "task_id": 29, "test_setup_code": "", "test_list": ["assert get_Odd_Occurrence([1,2,3,1,2,3,1],7) == 1", "assert get_Odd_Occurrence([1,2,3,2,3,1,3],7) == 3", "assert get_Odd_Occurrence([2,3,5,4,5,2,4,3,5,2,4,4,2],13) == 5"], "challenge_test_list": []}
{"text": "Write a python function to count all the substrings starting and ending with same characters.", "code": "def check_Equality(s): \r\n    return (ord(s[0]) == ord(s[len(s) - 1])); \r\ndef count_Substring_With_Equal_Ends(s): \r\n    result = 0; \r\n    n = len(s); \r\n    for i in range(n): \r\n        for j in range(1,n-i+1):  \r\n            if (check_Equality(s[i:i+j])): \r\n                result+=1; \r\n    return result; ", "task_id": 30, "test_setup_code": "", "test_list": ["assert count_Substring_With_Equal_Ends(\"abc\") == 3", "assert count_Substring_With_Equal_Ends(\"abcda\") == 6", "assert count_Substring_With_Equal_Ends(\"ab\") == 2"], "challenge_test_list": []}
{"text": "Write a function to find the top k integers that occur most frequently from given lists of sorted and distinct integers using heap queue algorithm.", "code": "def func(nums, k):\r\n    import collections\r\n    d = collections.defaultdict(int)\r\n    for row in nums:\r\n        for i in row:\r\n            d[i] += 1\r\n    temp = []\r\n    import heapq\r\n    for key, v in d.items():\r\n        if len(temp) < k:\r\n            temp.append((v, key))\r\n            if len(temp) == k:\r\n                heapq.heapify(temp)\r\n        else:\r\n            if v > temp[0][0]:\r\n                heapq.heappop(temp)\r\n                heapq.heappush(temp, (v, key))\r\n    result = []\r\n    while temp:\r\n        v, key = heapq.heappop(temp)\r\n        result.append(key)\r\n    return result", "task_id": 31, "test_setup_code": "", "test_list": ["assert func([[1, 2, 6], [1, 3, 4, 5, 7, 8], [1, 3, 5, 6, 8, 9], [2, 5, 7, 11], [1, 4, 7, 8, 12]],3)==[5, 7, 1]", "assert func([[1, 2, 6], [1, 3, 4, 5, 7, 8], [1, 3, 5, 6, 8, 9], [2, 5, 7, 11], [1, 4, 7, 8, 12]],1)==[1]", "assert func([[1, 2, 6], [1, 3, 4, 5, 7, 8], [1, 3, 5, 6, 8, 9], [2, 5, 7, 11], [1, 4, 7, 8, 12]],5)==[6, 5, 7, 8, 1]"], "challenge_test_list": []}
{"text": "Write a python function to find the largest prime factor of a given number.", "code": "import math \r\ndef max_Prime_Factors (n): \r\n    maxPrime = -1 \r\n    while n%2 == 0: \r\n        maxPrime = 2\r\n        n >>= 1    \r\n    for i in range(3,int(math.sqrt(n))+1,2): \r\n        while n % i == 0: \r\n            maxPrime = i \r\n            n = n / i \r\n    if n > 2: \r\n        maxPrime = n  \r\n    return int(maxPrime)", "task_id": 32, "test_setup_code": "", "test_list": ["assert max_Prime_Factors(15) == 5", "assert max_Prime_Factors(6) == 3", "assert max_Prime_Factors(2) == 2"], "challenge_test_list": []}
{"text": "Write a python function to convert a decimal number to binary number.", "code": "def decimal_To_Binary(N): \r\n    B_Number = 0\r\n    cnt = 0\r\n    while (N != 0): \r\n        rem = N % 2\r\n        c = pow(10,cnt)  \r\n        B_Number += rem*c  \r\n        N //= 2 \r\n        cnt += 1\r\n    return B_Number  ", "task_id": 33, "test_setup_code": "", "test_list": ["assert decimal_To_Binary(10) == 1010", "assert decimal_To_Binary(1) == 1", "assert decimal_To_Binary(20) == 10100"], "challenge_test_list": []}
{"text": "Write a python function to find the missing number in a sorted array.", "code": "def find_missing(ar,N): \r\n    l = 0\r\n    r = N - 1\r\n    while (l <= r):  \r\n        mid = (l + r) / 2\r\n        mid= int (mid) \r\n        if (ar[mid] != mid + 1 and ar[mid - 1] == mid): \r\n            return (mid + 1)  \r\n        elif (ar[mid] != mid + 1): \r\n            r = mid - 1 \r\n        else: \r\n            l = mid + 1\r\n    return (-1) ", "task_id": 34, "test_setup_code": "", "test_list": ["assert find_missing([1,2,3,5],4) == 4", "assert find_missing([1,3,4,5],4) == 2", "assert find_missing([1,2,3,5,6,7],5) == 4"], "challenge_test_list": []}
{"text": "Write a function to find the n-th rectangular number.", "code": "def find_rect_num(n):\r\n  return n*(n + 1) ", "task_id": 35, "test_setup_code": "", "test_list": ["assert find_rect_num(4) == 20", "assert find_rect_num(5) == 30", "assert find_rect_num(6) == 42"], "challenge_test_list": []}
{"text": "Write a python function to find the nth digit in the proper fraction of two given numbers.", "code": "def find_Nth_Digit(p,q,N) :  \r\n    while (N > 0) : \r\n        N -= 1;  \r\n        p *= 10;  \r\n        res = p // q;  \r\n        p %= q;  \r\n    return res;  ", "task_id": 36, "test_setup_code": "", "test_list": ["assert find_Nth_Digit(1,2,1) == 5", "assert find_Nth_Digit(3,5,1) == 6", "assert find_Nth_Digit(5,6,5) == 3"], "challenge_test_list": []}
{"text": "Write a function to sort a given mixed list of integers and strings.", "code": "def sort_mixed_list(mixed_list):\r\n    int_part = sorted([i for i in mixed_list if type(i) is int])\r\n    str_part = sorted([i for i in mixed_list if type(i) is str])\r\n    return int_part + str_part", "task_id": 37, "test_setup_code": "", "test_list": ["assert sort_mixed_list([19,'red',12,'green','blue', 10,'white','green',1])==[1, 10, 12, 19, 'blue', 'green', 'green', 'red', 'white']", "assert sort_mixed_list([19,'red',12,'green','blue', 10,'white','green',1])==[1, 10, 12, 19, 'blue', 'green', 'green', 'red', 'white']", "assert sort_mixed_list([19,'red',12,'green','blue', 10,'white','green',1])==[1, 10, 12, 19, 'blue', 'green', 'green', 'red', 'white']"], "challenge_test_list": []}
{"text": "Write a function to find the division of first even and odd number of a given list.", "code": "def div_even_odd(list1):\r\n    first_even = next((el for el in list1 if el%2==0),-1)\r\n    first_odd = next((el for el in list1 if el%2!=0),-1)\r\n    return (first_even/first_odd)", "task_id": 38, "test_setup_code": "", "test_list": ["assert div_even_odd([1,3,5,7,4,1,6,8])==4", "assert div_even_odd([1,2,3,4,5,6,7,8,9,10])==2", "assert div_even_odd([1,5,7,9,10])==10"], "challenge_test_list": []}
{"text": "Write a function to check if the letters of a given string can be rearranged so that two characters that are adjacent to each other are different.", "code": "import heapq\r\nfrom collections import Counter\r\ndef rearange_string(S):\r\n    ctr = Counter(S)\r\n    heap = [(-value, key) for key, value in ctr.items()]\r\n    heapq.heapify(heap)\r\n    if (-heap[0][0]) * 2 > len(S) + 1: \r\n        return \"\"\r\n    ans = []\r\n    while len(heap) >= 2:\r\n        nct1, char1 = heapq.heappop(heap)\r\n        nct2, char2 = heapq.heappop(heap)\r\n        ans.extend([char1, char2])\r\n        if nct1 + 1: heapq.heappush(heap, (nct1 + 1, char1))\r\n        if nct2 + 1: heapq.heappush(heap, (nct2 + 1, char2))\r\n    return \"\".join(ans) + (heap[0][1] if heap else \"\")", "task_id": 39, "test_setup_code": "", "test_list": ["assert rearange_string(\"aab\")==('aba')", "assert rearange_string(\"aabb\")==('abab')", "assert rearange_string(\"abccdd\")==('cdabcd')"], "challenge_test_list": []}
{"text": "Write a function to find frequency of the elements in a given list of lists using collections module.", "code": "from collections import Counter\r\nfrom itertools import chain\r\ndef freq_element(nums):\r\n  result = Counter(chain.from_iterable(nums))\r\n  return result", "task_id": 40, "test_setup_code": "", "test_list": ["assert freq_element([[1, 2, 3, 2], [4, 5, 6, 2], [7, 1, 9, 5]])==({2: 3, 1: 2, 5: 2, 3: 1, 4: 1, 6: 1, 7: 1, 9: 1})", "assert freq_element([[1,2,3,4],[5,6,7,8],[9,10,11,12]])==({1: 1, 2: 1, 3: 1, 4: 1, 5: 1, 6: 1, 7: 1, 8: 1, 9: 1, 10: 1, 11: 1, 12: 1})", "assert freq_element([[15,20,30,40],[80,90,100,110],[30,30,80,90]])==({30: 3, 80: 2, 90: 2, 15: 1, 20: 1, 40: 1, 100: 1, 110: 1})"], "challenge_test_list": []}
{"text": "Write a function to filter even numbers using lambda function.", "code": "def filter_evennumbers(nums):\r\n even_nums = list(filter(lambda x: x%2 == 0, nums))\r\n return even_nums", "task_id": 41, "test_setup_code": "", "test_list": ["assert filter_evennumbers([1, 2, 3, 4, 5, 6, 7, 8, 9, 10])==[2, 4, 6, 8, 10]", "assert filter_evennumbers([10,20,45,67,84,93])==[10,20,84]", "assert filter_evennumbers([5,7,9,8,6,4,3])==[8,6,4]"], "challenge_test_list": []}
{"text": "Write a python function to find the sum of repeated elements in a given array.", "code": "def find_Sum(arr,n): \r\n    return sum([x for x in arr if arr.count(x) > 1])", "task_id": 42, "test_setup_code": "", "test_list": ["assert find_Sum([1,2,3,1,1,4,5,6],8) == 3", "assert find_Sum([1,2,3,1,1],5) == 3", "assert find_Sum([1,1,2],3) == 2"], "challenge_test_list": ["assert find_Sum([1,1,2,3,4,5,6,3,5],9) == 18"]}
{"text": "Write a function to find sequences of lowercase letters joined with an underscore using regex.", "code": "import re\r\ndef text_match(text):\r\n  patterns = '^[a-z]+_[a-z]+$'\r\n  if re.search(patterns,  text):\r\n    return ('Found a match!')\r\n  else:\r\n    return ('Not matched!')", "task_id": 43, "test_setup_code": "", "test_list": ["assert text_match(\"aab_cbbbc\") == 'Found a match!'", "assert text_match(\"aab_Abbbc\") == 'Not matched!'", "assert text_match(\"Aaab_abbbc\") == 'Not matched!'"], "challenge_test_list": ["assert text_match(\"aab-cbbbc\") == 'Not matched!'"]}
{"text": "Write a function that matches a word at the beginning of a string.", "code": "import re\r\ndef text_match_string(text):\r\n        patterns = '^\\w+'\r\n        if re.search(patterns,  text):\r\n                return 'Found a match!'\r\n        else:\r\n                return 'Not matched!'", "task_id": 44, "test_setup_code": "", "test_list": ["assert text_match_string(\" python\")==('Not matched!')", "assert text_match_string(\"python\")==('Found a match!')", "assert text_match_string(\"  lang\")==('Not matched!')"], "challenge_test_list": ["assert text_match_string(\"foo\")==('Found a match!')"]}
{"text": "Write a function to find the gcd of the given array elements.", "code": "def find_gcd(x, y): \r\n\twhile(y): \r\n\t\tx, y = y, x % y \r\n\treturn x \r\ndef get_gcd(l):\r\n  num1 = l[0]\r\n  num2 = l[1]\r\n  gcd = find_gcd(num1, num2)\r\n  for i in range(2, len(l)):\r\n    gcd = find_gcd(gcd, l[i])\r\n  return gcd", "task_id": 45, "test_setup_code": "", "test_list": ["assert get_gcd([2, 4, 6, 8, 16]) == 2", "assert get_gcd([1, 2, 3]) == 1", "assert get_gcd([2, 4, 6, 8]) == 2 "], "challenge_test_list": []}
{"text": "Write a python function to determine whether all the numbers are different from each other are not.", "code": "def test_distinct(data):\r\n  if len(data) == len(set(data)):\r\n    return True\r\n  else:\r\n    return False;", "task_id": 46, "test_setup_code": "", "test_list": ["assert test_distinct([1,5,7,9]) == True", "assert test_distinct([2,4,5,5,7,9]) == False", "assert test_distinct([1,2,3]) == True"], "challenge_test_list": []}
{"text": "Write a python function to find the last digit when factorial of a divides factorial of b.", "code": "def compute_Last_Digit(A,B): \r\n    variable = 1\r\n    if (A == B): \r\n        return 1\r\n    elif ((B - A) >= 5):  \r\n        return 0\r\n    else:   \r\n        for i in range(A + 1,B + 1): \r\n            variable = (variable * (i % 10)) % 10\r\n        return variable % 10", "task_id": 47, "test_setup_code": "", "test_list": ["assert compute_Last_Digit(2,4) == 2", "assert compute_Last_Digit(6,8) == 6", "assert compute_Last_Digit(1,2) == 2"], "challenge_test_list": ["assert compute_Last_Digit(3,7) == 0", "assert compute_Last_Digit(20,23) == 6", "assert compute_Last_Digit(1021,1024) == 4"]}
{"text": "Write a python function to set all odd bits of a given number.", "code": "def odd_bit_set_number(n):\r\n    count = 0;res = 0;temp = n\r\n    while temp > 0:\r\n        if count % 2 == 0:\r\n            res |= (1 << count)\r\n        count += 1\r\n        temp >>= 1\r\n    return (n | res)", "task_id": 48, "test_setup_code": "", "test_list": ["assert odd_bit_set_number(10) == 15", "assert odd_bit_set_number(20) == 21", "assert odd_bit_set_number(30) == 31"], "challenge_test_list": []}
{"text": "Write a function to extract every first or specified element from a given two-dimensional list.", "code": "def specified_element(nums, N):\r\n    result = [i[N] for i in nums]\r\n    return result\r\n    ", "task_id": 49, "test_setup_code": "", "test_list": ["assert specified_element([[1, 2, 3, 2], [4, 5, 6, 2], [7, 1, 9, 5]],0)==[1, 4, 7]", "assert specified_element([[1, 2, 3, 2], [4, 5, 6, 2], [7, 1, 9, 5]],2)==[3, 6, 9]", "assert specified_element([[1, 2, 3, 2], [4, 5, 6, 2], [7, 1, 9, 5]],1)==[2,5,1]"], "challenge_test_list": []}
{"text": "Write a function to find the list with minimum length using lambda function.", "code": "def min_length_list(input_list):\r\n    min_length = min(len(x) for x in input_list )  \r\n    min_list = min(input_list, key = lambda i: len(i))\r\n    return(min_length, min_list)", "task_id": 50, "test_setup_code": "", "test_list": ["assert min_length_list([[0], [1, 3], [5, 7], [9, 11], [13, 15, 17]])==(1, [0])", "assert min_length_list([[1,2,3,4,5],[1,2,3,4],[1,2,3],[1,2],[1]])==(1,[1])", "assert min_length_list([[3,4,5],[6,7,8,9],[10,11,12],[1,2]])==(2,[1,2])"], "challenge_test_list": []}
{"text": "Write a function to print check if the triangle is equilateral or not.", "code": "def check_equilateral(x,y,z):\r\n  if x == y == z:\r\n\t   return True\r\n  else:\r\n     return False", "task_id": 51, "test_setup_code": "", "test_list": ["assert check_equilateral(6,8,12)==False ", "assert check_equilateral(6,6,12)==False", "assert check_equilateral(6,6,6)==True"], "challenge_test_list": []}
{"text": "Write a function to caluclate area of a parallelogram.", "code": "def parallelogram_area(b,h):\r\n  area=b*h\r\n  return area", "task_id": 52, "test_setup_code": "", "test_list": ["assert parallelogram_area(10,20)==200", "assert parallelogram_area(15,20)==300", "assert parallelogram_area(8,9)==72"], "challenge_test_list": []}
{"text": "Write a python function to check whether the first and last characters of a given string are equal or not.", "code": "def check_Equality(str):\r\n  if (str[0] == str[-1]):  \r\n    return (\"Equal\") \r\n  else:  \r\n    return (\"Not Equal\") ", "task_id": 53, "test_setup_code": "", "test_list": ["assert check_Equality(\"abcda\") == \"Equal\"", "assert check_Equality(\"ab\") == \"Not Equal\"", "assert check_Equality(\"mad\") == \"Not Equal\""], "challenge_test_list": []}
{"text": "Write a function to sort the given array by using counting sort.", "code": "def counting_sort(my_list):\r\n    max_value = 0\r\n    for i in range(len(my_list)):\r\n        if my_list[i] > max_value:\r\n            max_value = my_list[i]\r\n    buckets = [0] * (max_value + 1)\r\n    for i in my_list:\r\n        buckets[i] += 1\r\n    i = 0\r\n    for j in range(max_value + 1):\r\n         for a in range(buckets[j]):\r\n             my_list[i] = j\r\n             i += 1\r\n    return my_list", "task_id": 54, "test_setup_code": "", "test_list": ["assert counting_sort([1,23,4,5,6,7,8]) == [1, 4, 5, 6, 7, 8, 23]", "assert counting_sort([12, 9, 28, 33, 69, 45]) == [9, 12, 28, 33, 45, 69]", "assert counting_sort([8, 4, 14, 3, 2, 1]) == [1, 2, 3, 4, 8, 14]"], "challenge_test_list": []}
{"text": "Write a function to find t-nth term of geometric series.", "code": "import math\r\ndef tn_gp(a,n,r):\r\n  tn = a * (math.pow(r, n - 1))\r\n  return tn", "task_id": 55, "test_setup_code": "", "test_list": ["assert tn_gp(1,5,2)==16", "assert tn_gp(1,5,4)==256", "assert tn_gp(2,6,3)==486"], "challenge_test_list": []}
{"text": "Write a python function to check if a given number is one less than twice its reverse.", "code": "def rev(num):    \r\n    rev_num = 0\r\n    while (num > 0):  \r\n        rev_num = (rev_num * 10 + num % 10) \r\n        num = num // 10  \r\n    return rev_num  \r\ndef check(n):    \r\n    return (2 * rev(n) == n + 1)  ", "task_id": 56, "test_setup_code": "", "test_list": ["assert check(70) == False", "assert check(23) == False", "assert check(73) == True"], "challenge_test_list": []}
{"text": "Write a python function to find the largest number that can be formed with the given digits.", "code": "def find_Max_Num(arr,n) : \r\n    arr.sort(reverse = True) \r\n    num = arr[0] \r\n    for i in range(1,n) : \r\n        num = num * 10 + arr[i] \r\n    return num ", "task_id": 57, "test_setup_code": "", "test_list": ["assert find_Max_Num([1,2,3],3) == 321", "assert find_Max_Num([4,5,6,1],4) == 6541", "assert find_Max_Num([1,2,3,9],4) == 9321"], "challenge_test_list": []}
{"text": "Write a python function to check whether the given two integers have opposite sign or not.", "code": "def opposite_Signs(x,y): \r\n    return ((x ^ y) < 0); ", "task_id": 58, "test_setup_code": "", "test_list": ["assert opposite_Signs(1,-2) == True", "assert opposite_Signs(3,2) == False", "assert opposite_Signs(-10,-10) == False"], "challenge_test_list": []}
{"text": "Write a function to find the nth octagonal number.", "code": "def is_octagonal(n): \r\n\treturn 3 * n * n - 2 * n ", "task_id": 59, "test_setup_code": "", "test_list": ["assert is_octagonal(5) == 65", "assert is_octagonal(10) == 280", "assert is_octagonal(15) == 645"], "challenge_test_list": []}
{"text": "Write a function to find the maximum length of the subsequence with difference between adjacent elements for the given array.", "code": "def max_len_sub( arr, n): \r\n\tmls=[] \r\n\tmax = 0\r\n\tfor i in range(n): \r\n\t\tmls.append(1) \r\n\tfor i in range(n): \r\n\t\tfor j in range(i): \r\n\t\t\tif (abs(arr[i] - arr[j]) <= 1 and mls[i] < mls[j] + 1): \r\n\t\t\t\tmls[i] = mls[j] + 1\r\n\tfor i in range(n): \r\n\t\tif (max < mls[i]): \r\n\t\t\tmax = mls[i] \r\n\treturn max", "task_id": 60, "test_setup_code": "", "test_list": ["assert max_len_sub([2, 5, 6, 3, 7, 6, 5, 8], 8) == 5", "assert max_len_sub([-2, -1, 5, -1, 4, 0, 3], 7) == 4", "assert max_len_sub([9, 11, 13, 15, 18], 5) == 1"], "challenge_test_list": []}
{"text": "Write a python function to count number of substrings with the sum of digits equal to their length.", "code": "from collections import defaultdict\r\ndef count_Substrings(s,n):\r\n    count,sum = 0,0\r\n    mp = defaultdict(lambda : 0)\r\n    mp[0] += 1\r\n    for i in range(n):\r\n        sum += ord(s[i]) - ord('0')\r\n        count += mp[sum - (i + 1)]\r\n        mp[sum - (i + 1)] += 1\r\n    return count", "task_id": 61, "test_setup_code": "", "test_list": ["assert count_Substrings('112112',6) == 6", "assert count_Substrings('111',3) == 6", "assert count_Substrings('1101112',7) == 12"], "challenge_test_list": []}
{"text": "Write a python function to find smallest number in a list.", "code": "def smallest_num(xs):\n  return min(xs)\n", "task_id": 62, "test_setup_code": "", "test_list": ["assert smallest_num([10, 20, 1, 45, 99]) == 1", "assert smallest_num([1, 2, 3]) == 1", "assert smallest_num([45, 46, 50, 60]) == 45"], "challenge_test_list": []}
{"text": "Write a function to find the maximum difference between available pairs in the given tuple list.", "code": "def max_difference(test_list):\r\n  temp = [abs(b - a) for a, b in test_list]\r\n  res = max(temp)\r\n  return (res) ", "task_id": 63, "test_setup_code": "", "test_list": ["assert max_difference([(3, 5), (1, 7), (10, 3), (1, 2)]) == 7", "assert max_difference([(4, 6), (2, 17), (9, 13), (11, 12)]) == 15", "assert max_difference([(12, 35), (21, 27), (13, 23), (41, 22)]) == 23"], "challenge_test_list": []}
{"text": "Write a function to sort a list of tuples using lambda.", "code": "def subject_marks(subjectmarks):\r\n#subject_marks = [('English', 88), ('Science', 90), ('Maths', 97), ('Social sciences', 82)])\r\n subjectmarks.sort(key = lambda x: x[1])\r\n return subjectmarks", "task_id": 64, "test_setup_code": "", "test_list": ["assert subject_marks([('English', 88), ('Science', 90), ('Maths', 97), ('Social sciences', 82)])==[('Social sciences', 82), ('English', 88), ('Science', 90), ('Maths', 97)]", "assert subject_marks([('Telugu',49),('Hindhi',54),('Social',33)])==([('Social',33),('Telugu',49),('Hindhi',54)])", "assert subject_marks([('Physics',96),('Chemistry',97),('Biology',45)])==([('Biology',45),('Physics',96),('Chemistry',97)])"], "challenge_test_list": []}
{"text": "Write a function of recursion list sum.", "code": "def recursive_list_sum(data_list):\r\n\ttotal = 0\r\n\tfor element in data_list:\r\n\t\tif type(element) == type([]):\r\n\t\t\ttotal = total + recursive_list_sum(element)\r\n\t\telse:\r\n\t\t\ttotal = total + element\r\n\treturn total", "task_id": 65, "test_setup_code": "", "test_list": ["assert recursive_list_sum(([1, 2, [3,4],[5,6]]))==21", "assert recursive_list_sum(([7, 10, [15,14],[19,41]]))==106", "assert recursive_list_sum(([10, 20, [30,40],[50,60]]))==210"], "challenge_test_list": []}
{"text": "Write a python function to count positive numbers in a list.", "code": "def pos_count(list):\r\n  pos_count= 0\r\n  for num in list: \r\n    if num >= 0: \r\n      pos_count += 1\r\n  return pos_count ", "task_id": 66, "test_setup_code": "", "test_list": ["assert pos_count([1,-2,3,-4]) == 2", "assert pos_count([3,4,5,-1]) == 3", "assert pos_count([1,2,3,4]) == 4"], "challenge_test_list": []}
{"text": "Write a function to find the number of ways to partition a set of bell numbers.", "code": "def bell_number(n):   \r\n    bell = [[0 for i in range(n+1)] for j in range(n+1)] \r\n    bell[0][0] = 1\r\n    for i in range(1, n+1): \r\n        bell[i][0] = bell[i-1][i-1]  \r\n        for j in range(1, i+1): \r\n            bell[i][j] = bell[i-1][j-1] + bell[i][j-1]   \r\n    return bell[n][0] ", "task_id": 67, "test_setup_code": "", "test_list": ["assert bell_number(2)==2", "assert bell_number(10)==115975", "assert bell_number(56)==6775685320645824322581483068371419745979053216268760300"], "challenge_test_list": []}
{"text": "Write a python function to check whether the given array is monotonic or not.", "code": "def is_Monotonic(A): \r\n    return (all(A[i] <= A[i + 1] for i in range(len(A) - 1)) or\r\n            all(A[i] >= A[i + 1] for i in range(len(A) - 1))) ", "task_id": 68, "test_setup_code": "", "test_list": ["assert is_Monotonic([6, 5, 4, 4]) == True", "assert is_Monotonic([1, 2, 2, 3]) == True", "assert is_Monotonic([1, 3, 2]) == False"], "challenge_test_list": []}
{"text": "Write a function to check whether a list contains the given sublist or not.", "code": "def is_sublist(l, s):\r\n\tsub_set = False\r\n\tif s == []:\r\n\t\tsub_set = True\r\n\telif s == l:\r\n\t\tsub_set = True\r\n\telif len(s) > len(l):\r\n\t\tsub_set = False\r\n\telse:\r\n\t\tfor i in range(len(l)):\r\n\t\t\tif l[i] == s[0]:\r\n\t\t\t\tn = 1\r\n\t\t\t\twhile (n < len(s)) and (l[i+n] == s[n]):\r\n\t\t\t\t\tn += 1\t\t\t\t\r\n\t\t\t\tif n == len(s):\r\n\t\t\t\t\tsub_set = True\r\n\treturn sub_set", "task_id": 69, "test_setup_code": "", "test_list": ["assert is_sublist([2,4,3,5,7],[3,7])==False", "assert is_sublist([2,4,3,5,7],[4,3])==True", "assert is_sublist([2,4,3,5,7],[1,6])==False"], "challenge_test_list": []}
{"text": "Write a function to find whether all the given tuples have equal length or not.", "code": "def find_equal_tuple(Input, k):\r\n  flag = 1\r\n  for tuple in Input:\r\n    if len(tuple) != k:\r\n      flag = 0\r\n      break\r\n  return flag\r\ndef get_equal(Input, k):\r\n  if find_equal_tuple(Input, k) == 1:\r\n    return (\"All tuples have same length\")\r\n  else:\r\n    return (\"All tuples do not have same length\")", "task_id": 70, "test_setup_code": "", "test_list": ["assert get_equal([(11, 22, 33), (44, 55, 66)], 3) == 'All tuples have same length'", "assert get_equal([(1, 2, 3), (4, 5, 6, 7)], 3) == 'All tuples do not have same length'", "assert get_equal([(1, 2), (3, 4)], 2) == 'All tuples have same length'"], "challenge_test_list": []}
{"text": "Write a function to sort a list of elements using comb sort.", "code": "def comb_sort(nums):\r\n    shrink_fact = 1.3\r\n    gaps = len(nums)\r\n    swapped = True\r\n    i = 0\r\n    while gaps > 1 or swapped:\r\n        gaps = int(float(gaps) / shrink_fact)\r\n        swapped = False\r\n        i = 0\r\n        while gaps + i < len(nums):\r\n            if nums[i] > nums[i+gaps]:\r\n                nums[i], nums[i+gaps] = nums[i+gaps], nums[i]\r\n                swapped = True\r\n            i += 1\r\n    return nums", "task_id": 71, "test_setup_code": "", "test_list": ["assert comb_sort([5, 15, 37, 25, 79]) == [5, 15, 25, 37, 79]", "assert comb_sort([41, 32, 15, 19, 22]) == [15, 19, 22, 32, 41]", "assert comb_sort([99, 15, 13, 47]) == [13, 15, 47, 99]"], "challenge_test_list": []}
{"text": "Write a python function to check whether the given number can be represented as difference of two squares or not.", "code": "def dif_Square(n): \r\n    if (n % 4 != 2): \r\n        return True\r\n    return False", "task_id": 72, "test_setup_code": "", "test_list": ["assert dif_Square(5) == True", "assert dif_Square(10) == False", "assert dif_Square(15) == True"], "challenge_test_list": []}
{"text": "Write a function to split the given string with multiple delimiters by using regex.", "code": "import re\r\ndef multiple_split(text):\r\n  return (re.split('; |, |\\*|\\n',text))", "task_id": 73, "test_setup_code": "", "test_list": ["assert multiple_split('Forces of the \\ndarkness*are coming into the play.') == ['Forces of the ', 'darkness', 'are coming into the play.']", "assert multiple_split('Mi Box runs on the \\n Latest android*which has google assistance and chromecast.') == ['Mi Box runs on the ', ' Latest android', 'which has google assistance and chromecast.']", "assert multiple_split('Certain services\\nare subjected to change*over the seperate subscriptions.') == ['Certain services', 'are subjected to change', 'over the seperate subscriptions.']"], "challenge_test_list": []}
{"text": "Write a function to check whether it follows the sequence given in the patterns array.", "code": "def is_samepatterns(colors, patterns):    \r\n    if len(colors) != len(patterns):\r\n        return False    \r\n    sdict = {}\r\n    pset = set()\r\n    sset = set()    \r\n    for i in range(len(patterns)):\r\n        pset.add(patterns[i])\r\n        sset.add(colors[i])\r\n        if patterns[i] not in sdict.keys():\r\n            sdict[patterns[i]] = []\r\n\r\n        keys = sdict[patterns[i]]\r\n        keys.append(colors[i])\r\n        sdict[patterns[i]] = keys\r\n\r\n    if len(pset) != len(sset):\r\n        return False   \r\n\r\n    for values in sdict.values():\r\n\r\n        for i in range(len(values) - 1):\r\n            if values[i] != values[i+1]:\r\n                return False\r\n\r\n    return True", "task_id": 74, "test_setup_code": "", "test_list": ["assert is_samepatterns([\"red\",\"green\",\"green\"], [\"a\", \"b\", \"b\"])==True ", "assert is_samepatterns([\"red\",\"green\",\"greenn\"], [\"a\",\"b\",\"b\"])==False ", "assert is_samepatterns([\"red\",\"green\",\"greenn\"], [\"a\",\"b\"])==False "], "challenge_test_list": []}
{"text": "Write a function to find tuples which have all elements divisible by k from the given list of tuples.", "code": "def find_tuples(test_list, K):\r\n  res = [sub for sub in test_list if all(ele % K == 0 for ele in sub)]\r\n  return (str(res)) ", "task_id": 75, "test_setup_code": "", "test_list": ["assert find_tuples([(6, 24, 12), (7, 9, 6), (12, 18, 21)], 6) == '[(6, 24, 12)]'", "assert find_tuples([(5, 25, 30), (4, 2, 3), (7, 8, 9)], 5) == '[(5, 25, 30)]'", "assert find_tuples([(7, 9, 16), (8, 16, 4), (19, 17, 18)], 4) == '[(8, 16, 4)]'"], "challenge_test_list": []}
{"text": "Write a python function to count the number of squares in a rectangle.", "code": "def count_Squares(m,n):\r\n    if(n < m):\r\n        temp = m\r\n        m = n\r\n        n = temp\r\n    return ((m * (m + 1) * (2 * m + 1) / 6 + (n - m) * m * (m + 1) / 2))", "task_id": 76, "test_setup_code": "", "test_list": ["assert count_Squares(4,3) == 20", "assert count_Squares(2,2) == 5", "assert count_Squares(1,1) == 1"], "challenge_test_list": []}
{"text": "Write a python function to find the difference between sum of even and odd digits.", "code": "def is_Diff(n): \r\n    return (n % 11 == 0) ", "task_id": 77, "test_setup_code": "", "test_list": ["assert is_Diff (12345) == False", "assert is_Diff(1212112) == True", "assert is_Diff(1212) == False"], "challenge_test_list": []}
{"text": "Write a python function to find number of integers with odd number of set bits.", "code": "def count_With_Odd_SetBits(n): \r\n    if (n % 2 != 0): \r\n        return (n + 1) / 2\r\n    count = bin(n).count('1') \r\n    ans = n / 2\r\n    if (count % 2 != 0): \r\n        ans += 1\r\n    return ans ", "task_id": 78, "test_setup_code": "", "test_list": ["assert count_With_Odd_SetBits(5) == 3", "assert count_With_Odd_SetBits(10) == 5", "assert count_With_Odd_SetBits(15) == 8"], "challenge_test_list": []}
{"text": "Write a python function to check whether the length of the word is odd or not.", "code": "def word_len(s): \r\n    s = s.split(' ')   \r\n    for word in s:    \r\n        if len(word)%2!=0: \r\n            return True  \r\n        else:\r\n          return False", "task_id": 79, "test_setup_code": "", "test_list": ["assert word_len(\"Hadoop\") == False", "assert word_len(\"great\") == True", "assert word_len(\"structure\") == True"], "challenge_test_list": []}
{"text": "Write a function to find the nth tetrahedral number.", "code": "def tetrahedral_number(n): \r\n\treturn (n * (n + 1) * (n + 2)) / 6", "task_id": 80, "test_setup_code": "", "test_list": ["assert tetrahedral_number(5) == 35.0", "assert tetrahedral_number(6) == 56.0", "assert tetrahedral_number(7) == 84.0"], "challenge_test_list": []}
{"text": "Write a function to zip the two given tuples.", "code": "def zip_tuples(test_tup1, test_tup2):\r\n  res = []\r\n  for i, j in enumerate(test_tup1):\r\n    res.append((j, test_tup2[i % len(test_tup2)])) \r\n  return (res) ", "task_id": 81, "test_setup_code": "", "test_list": ["assert zip_tuples((7, 8, 4, 5, 9, 10),(1, 5, 6) ) == [(7, 1), (8, 5), (4, 6), (5, 1), (9, 5), (10, 6)]", "assert zip_tuples((8, 9, 5, 6, 10, 11),(2, 6, 7) ) == [(8, 2), (9, 6), (5, 7), (6, 2), (10, 6), (11, 7)]", "assert zip_tuples((9, 10, 6, 7, 11, 12),(3, 7, 8) ) == [(9, 3), (10, 7), (6, 8), (7, 3), (11, 7), (12, 8)]"], "challenge_test_list": []}
{"text": "Write a function to find the volume of a sphere.", "code": "import math\r\ndef volume_sphere(r):\r\n  volume=(4/3)*math.pi*r*r*r\r\n  return volume", "task_id": 82, "test_setup_code": "", "test_list": ["assert volume_sphere(10)==4188.790204786391", "assert volume_sphere(25)==65449.84694978735", "assert volume_sphere(20)==33510.32163829113"], "challenge_test_list": []}
{"text": "Write a python function to find the character made by adding all the characters of the given string.", "code": "def get_Char(strr):  \r\n    summ = 0\r\n    for i in range(len(strr)): \r\n        summ += (ord(strr[i]) - ord('a') + 1)  \r\n    if (summ % 26 == 0): \r\n        return ord('z') \r\n    else: \r\n        summ = summ % 26\r\n        return chr(ord('a') + summ - 1)", "task_id": 83, "test_setup_code": "", "test_list": ["assert get_Char(\"abc\") == \"f\"", "assert get_Char(\"gfg\") == \"t\"", "assert get_Char(\"ab\") == \"c\""], "challenge_test_list": []}
{"text": "Write a function to find the n-th number in newman conway sequence.", "code": "def sequence(n): \r\n\tif n == 1 or n == 2: \r\n\t\treturn 1\r\n\telse: \r\n\t\treturn sequence(sequence(n-1)) + sequence(n-sequence(n-1))", "task_id": 84, "test_setup_code": "", "test_list": ["assert sequence(10) == 6", "assert sequence(2) == 1", "assert sequence(3) == 2"], "challenge_test_list": []}
{"text": "Write a function to find the surface area of a sphere.", "code": "import math\r\ndef surfacearea_sphere(r):\r\n  surfacearea=4*math.pi*r*r\r\n  return surfacearea", "task_id": 85, "test_setup_code": "", "test_list": ["assert surfacearea_sphere(10)==1256.6370614359173", "assert surfacearea_sphere(15)==2827.4333882308138", "assert surfacearea_sphere(20)==5026.548245743669"], "challenge_test_list": []}
{"text": "Write a function to find nth centered hexagonal number.", "code": "def centered_hexagonal_number(n):\r\n  return 3 * n * (n - 1) + 1", "task_id": 86, "test_setup_code": "", "test_list": ["assert centered_hexagonal_number(10) == 271", "assert centered_hexagonal_number(2) == 7", "assert centered_hexagonal_number(9) == 217"], "challenge_test_list": []}
{"text": "Write a function to merge three dictionaries into a single expression.", "code": "import collections as ct\r\ndef merge_dictionaries_three(dict1,dict2, dict3):\r\n    merged_dict = dict(ct.ChainMap({},dict1,dict2,dict3))\r\n    return merged_dict", "task_id": 87, "test_setup_code": "", "test_list": ["assert merge_dictionaries_three({ \"R\": \"Red\", \"B\": \"Black\", \"P\": \"Pink\" }, { \"G\": \"Green\", \"W\": \"White\" },{ \"O\": \"Orange\", \"W\": \"White\", \"B\": \"Black\" })=={'B': 'Black', 'R': 'Red', 'P': 'Pink', 'G': 'Green', 'W': 'White', 'O': 'Orange'}", "assert merge_dictionaries_three({ \"R\": \"Red\", \"B\": \"Black\", \"P\": \"Pink\" }, { \"G\": \"Green\", \"W\": \"White\" },{\"L\":\"lavender\",\"B\":\"Blue\"})=={'W': 'White', 'P': 'Pink', 'B': 'Black', 'R': 'Red', 'G': 'Green', 'L': 'lavender'}", "assert merge_dictionaries_three({ \"R\": \"Red\", \"B\": \"Black\", \"P\": \"Pink\" },{\"L\":\"lavender\",\"B\":\"Blue\"},{ \"G\": \"Green\", \"W\": \"White\" })=={'B': 'Black', 'P': 'Pink', 'R': 'Red', 'G': 'Green', 'L': 'lavender', 'W': 'White'}"], "challenge_test_list": []}
{"text": "Write a function to get the frequency of the elements in a list.", "code": "import collections\r\ndef freq_count(list1):\r\n  freq_count= collections.Counter(list1)\r\n  return freq_count", "task_id": 88, "test_setup_code": "", "test_list": ["assert freq_count([10,10,10,10,20,20,20,20,40,40,50,50,30])==({10: 4, 20: 4, 40: 2, 50: 2, 30: 1}) ", "assert freq_count([1,2,3,4,3,2,4,1,3,1,4])==({1:3, 2:2,3:3,4:3}) ", "assert freq_count([5,6,7,4,9,10,4,5,6,7,9,5])==({10:1,5:3,6:2,7:2,4:2,9:2}) "], "challenge_test_list": []}
{"text": "Write a function to find the closest smaller number than n.", "code": "def closest_num(N):\r\n  return (N - 1)", "task_id": 89, "test_setup_code": "", "test_list": ["assert closest_num(11) == 10", "assert closest_num(7) == 6", "assert closest_num(12) == 11"], "challenge_test_list": []}
{"text": "Write a python function to find the length of the longest word.", "code": "def len_log(list1):\r\n    max=len(list1[0])\r\n    for i in list1:\r\n        if len(i)>max:\r\n            max=len(i)\r\n    return max", "task_id": 90, "test_setup_code": "", "test_list": ["assert len_log([\"python\",\"PHP\",\"bigdata\"]) == 7", "assert len_log([\"a\",\"ab\",\"abc\"]) == 3", "assert len_log([\"small\",\"big\",\"tall\"]) == 5"], "challenge_test_list": []}
{"text": "Write a function to check if a substring is present in a given list of string values.", "code": "def find_substring(str1, sub_str):\r\n   if any(sub_str in s for s in str1):\r\n       return True\r\n   return False", "task_id": 91, "test_setup_code": "", "test_list": ["assert find_substring([\"red\", \"black\", \"white\", \"green\", \"orange\"],\"ack\")==True", "assert find_substring([\"red\", \"black\", \"white\", \"green\", \"orange\"],\"abc\")==False", "assert find_substring([\"red\", \"black\", \"white\", \"green\", \"orange\"],\"ange\")==True"], "challenge_test_list": []}
{"text": "Write a function to check whether the given number is undulating or not.", "code": "def is_undulating(n): \r\n\tif (len(n) <= 2): \r\n\t\treturn False\r\n\tfor i in range(2, len(n)): \r\n\t\tif (n[i - 2] != n[i]): \r\n\t\t\treturn False\r\n\treturn True", "task_id": 92, "test_setup_code": "", "test_list": ["assert is_undulating(\"1212121\") == True", "assert is_undulating(\"1991\") == False", "assert is_undulating(\"121\") == True"], "challenge_test_list": []}
{"text": "Write a function to calculate the value of 'a' to the power 'b'.", "code": "def power(a,b):\r\n\tif b==0:\r\n\t\treturn 1\r\n\telif a==0:\r\n\t\treturn 0\r\n\telif b==1:\r\n\t\treturn a\r\n\telse:\r\n\t\treturn a*power(a,b-1)", "task_id": 93, "test_setup_code": "", "test_list": ["assert power(3,4) == 81", "assert power(2,3) == 8", "assert power(5,5) == 3125"], "challenge_test_list": []}
{"text": "Write a function to extract the index minimum value record from the given tuples.", "code": "from operator import itemgetter \r\ndef index_minimum(test_list):\r\n  res = min(test_list, key = itemgetter(1))[0]\r\n  return (res) ", "task_id": 94, "test_setup_code": "", "test_list": ["assert index_minimum([('Rash', 143), ('Manjeet', 200), ('Varsha', 100)]) == 'Varsha'", "assert index_minimum([('Yash', 185), ('Dawood', 125), ('Sanya', 175)]) == 'Dawood'", "assert index_minimum([('Sai', 345), ('Salman', 145), ('Ayesha', 96)]) == 'Ayesha'"], "challenge_test_list": []}
{"text": "Write a python function to find the minimum length of sublist.", "code": "def Find_Min_Length(lst):  \r\n    minLength = min(len(x) for x in lst )\r\n    return minLength ", "task_id": 95, "test_setup_code": "", "test_list": ["assert Find_Min_Length([[1],[1,2]]) == 1", "assert Find_Min_Length([[1,2],[1,2,3],[1,2,3,4]]) == 2", "assert Find_Min_Length([[3,3,3],[4,4,4,4]]) == 3"], "challenge_test_list": []}
{"text": "Write a python function to find the number of divisors of a given integer.", "code": "def divisor(n):\r\n  for i in range(n):\r\n    x = len([i for i in range(1,n+1) if not n % i])\r\n  return x", "task_id": 96, "test_setup_code": "", "test_list": ["assert divisor(15) == 4 ", "assert divisor(12) == 6", "assert divisor(9) == 3"], "challenge_test_list": []}
{"text": "Write a function to find frequency count of list of lists.", "code": "def frequency_lists(list1):\r\n    list1 = [item for sublist in list1 for item in sublist]\r\n    dic_data = {}\r\n    for num in list1:\r\n        if num in dic_data.keys():\r\n            dic_data[num] += 1\r\n        else:\r\n            key = num\r\n            value = 1\r\n            dic_data[key] = value\r\n    return dic_data\r\n", "task_id": 97, "test_setup_code": "", "test_list": ["assert frequency_lists([[1, 2, 3, 2], [4, 5, 6, 2], [7, 8, 9, 5]])=={1: 1, 2: 3, 3: 1, 4: 1, 5: 2, 6: 1, 7: 1, 8: 1, 9: 1}", "assert frequency_lists([[1,2,3,4],[5,6,7,8],[9,10,11,12]])=={1: 1, 2: 1, 3: 1, 4: 1, 5: 1, 6: 1, 7: 1, 8: 1, 9: 1,10:1,11:1,12:1}", "assert frequency_lists([[20,30,40,17],[18,16,14,13],[10,20,30,40]])=={20:2,30:2,40:2,17: 1,18:1, 16: 1,14: 1,13: 1, 10: 1}"], "challenge_test_list": []}
{"text": "Write a function to multiply all the numbers in a list and divide with the length of the list.", "code": "def multiply_num(numbers):  \r\n    total = 1\r\n    for x in numbers:\r\n        total *= x  \r\n    return total/len(numbers) ", "task_id": 98, "test_setup_code": "", "test_list": ["assert multiply_num((8, 2, 3, -1, 7))==-67.2", "assert multiply_num((-10,-20,-30))==-2000.0", "assert multiply_num((19,15,18))==1710.0"], "challenge_test_list": []}
{"text": "Write a function to convert the given decimal number to its binary equivalent.", "code": "def decimal_to_binary(n): \r\n    return bin(n).replace(\"0b\",\"\") ", "task_id": 99, "test_setup_code": "", "test_list": ["assert decimal_to_binary(8) == '1000'", "assert decimal_to_binary(18) == '10010'", "assert decimal_to_binary(7) == '111' "], "challenge_test_list": []}
{"text": "Write a function to find the next smallest palindrome of a specified number.", "code": "import sys\r\ndef next_smallest_palindrome(num):\r\n    numstr = str(num)\r\n    for i in range(num+1,sys.maxsize):\r\n        if str(i) == str(i)[::-1]:\r\n            return i", "task_id": 100, "test_setup_code": "", "test_list": ["assert next_smallest_palindrome(99)==101", "assert next_smallest_palindrome(1221)==1331", "assert next_smallest_palindrome(120)==121"], "challenge_test_list": []}
{"text": "Write a function to find the kth element in the given array.", "code": "def kth_element(arr, n, k):\r\n  for i in range(n):\r\n    for j in range(0, n-i-1):\r\n      if arr[j] > arr[j+1]:\r\n        arr[j], arr[j+1] == arr[j+1], arr[j]\r\n  return arr[k-1]", "task_id": 101, "test_setup_code": "", "test_list": ["assert kth_element([12,3,5,7,19], 5, 2) == 3", "assert kth_element([17,24,8,23], 4, 3) == 8", "assert kth_element([16,21,25,36,4], 5, 4) == 36"], "challenge_test_list": []}
{"text": "Write a function to convert snake case string to camel case string.", "code": "def snake_to_camel(word):\r\n        import re\r\n        return ''.join(x.capitalize() or '_' for x in word.split('_'))", "task_id": 102, "test_setup_code": "", "test_list": ["assert snake_to_camel('python_program')=='PythonProgram'", "assert snake_to_camel('python_language')==('PythonLanguage')", "assert snake_to_camel('programming_language')==('ProgrammingLanguage')"], "challenge_test_list": []}
{"text": "Write a function to find eulerian number a(n, m).", "code": "def eulerian_num(n, m): \r\n\tif (m >= n or n == 0): \r\n\t\treturn 0 \r\n\tif (m == 0): \r\n\t\treturn 1 \r\n\treturn ((n - m) * eulerian_num(n - 1, m - 1) +(m + 1) * eulerian_num(n - 1, m))", "task_id": 103, "test_setup_code": "", "test_list": ["assert eulerian_num(3, 1) == 4", "assert eulerian_num(4, 1) == 11", "assert eulerian_num(5, 3) == 26"], "challenge_test_list": []}
{"text": "Write a function to sort each sublist of strings in a given list of lists using lambda function.", "code": "def sort_sublists(input_list):\r\n    result = [sorted(x, key = lambda x:x[0]) for x in input_list] \r\n    return result\r", "task_id": 104, "test_setup_code": "", "test_list": ["assert sort_sublists(([\"green\", \"orange\"], [\"black\", \"white\"], [\"white\", \"black\", \"orange\"]))==[['green', 'orange'], ['black', 'white'], ['black', 'orange', 'white']]", "assert sort_sublists(([\" red \",\"green\" ],[\"blue \",\" black\"],[\" orange\",\"brown\"]))==[[' red ', 'green'], [' black', 'blue '], [' orange', 'brown']]", "assert sort_sublists(([\"zilver\",\"gold\"], [\"magnesium\",\"aluminium\"], [\"steel\", \"bronze\"]))==[['gold', 'zilver'],['aluminium', 'magnesium'], ['bronze', 'steel']]"], "challenge_test_list": []}
{"text": "Write a python function to count true booleans in the given list.", "code": "def count(lst):   \r\n    return sum(lst) ", "task_id": 105, "test_setup_code": "", "test_list": ["assert count([True,False,True]) == 2", "assert count([False,False]) == 0", "assert count([True,True,True]) == 3"], "challenge_test_list": []}
{"text": "Write a function to add the given list to the given tuples.", "code": "def add_lists(test_list, test_tup):\r\n  res = tuple(list(test_tup) + test_list)\r\n  return (res) ", "task_id": 106, "test_setup_code": "", "test_list": ["assert add_lists([5, 6, 7], (9, 10)) == (9, 10, 5, 6, 7)", "assert add_lists([6, 7, 8], (10, 11)) == (10, 11, 6, 7, 8)", "assert add_lists([7, 8, 9], (11, 12)) == (11, 12, 7, 8, 9)"], "challenge_test_list": []}
{"text": "Write a python function to count hexadecimal numbers for a given range.", "code": "def count_Hexadecimal(L,R) :  \r\n    count = 0;  \r\n    for i in range(L,R + 1) : \r\n        if (i >= 10 and i <= 15) : \r\n            count += 1;  \r\n        elif (i > 15) : \r\n            k = i;  \r\n            while (k != 0) :  \r\n                if (k % 16 >= 10) : \r\n                    count += 1;  \r\n                k = k // 16;  \r\n    return count;  ", "task_id": 107, "test_setup_code": "", "test_list": ["assert count_Hexadecimal(10,15) == 6", "assert count_Hexadecimal(2,4) == 0", "assert count_Hexadecimal(15,16) == 1"], "challenge_test_list": []}
{"text": "Write a function to merge multiple sorted inputs into a single sorted iterator using heap queue algorithm.", "code": "import heapq\r\ndef merge_sorted_list(num1,num2,num3):\r\n  num1=sorted(num1)\r\n  num2=sorted(num2)\r\n  num3=sorted(num3)\r\n  result = heapq.merge(num1,num2,num3)\r\n  return list(result)", "task_id": 108, "test_setup_code": "", "test_list": ["assert merge_sorted_list([25, 24, 15, 4, 5, 29, 110],[19, 20, 11, 56, 25, 233, 154],[24, 26, 54, 48])==[4, 5, 11, 15, 19, 20, 24, 24, 25, 25, 26, 29, 48, 54, 56, 110, 154, 233]", "assert merge_sorted_list([1, 3, 5, 6, 8, 9], [2, 5, 7, 11], [1, 4, 7, 8, 12])==[1, 1, 2, 3, 4, 5, 5, 6, 7, 7, 8, 8, 9, 11, 12]", "assert merge_sorted_list([18, 14, 10, 9, 8, 7, 9, 3, 2, 4, 1],[25, 35, 22, 85, 14, 65, 75, 25, 58],[12, 74, 9, 50, 61, 41])==[1, 2, 3, 4, 7, 8, 9, 9, 9, 10, 12, 14, 14, 18, 22, 25, 25, 35, 41, 50, 58, 61, 65, 74, 75, 85]"], "challenge_test_list": []}
{"text": "Write a python function to find the count of rotations of a binary string with odd value.", "code": "def odd_Equivalent(s,n): \r\n    count=0\r\n    for i in range(0,n): \r\n        if (s[i] == '1'): \r\n            count = count + 1\r\n    return count ", "task_id": 109, "test_setup_code": "", "test_list": ["assert odd_Equivalent(\"011001\",6) == 3", "assert odd_Equivalent(\"11011\",5) == 4", "assert odd_Equivalent(\"1010\",4) == 2"], "challenge_test_list": []}
{"text": "Write a function to extract the ranges that are missing from the given list with the given start range and end range values.", "code": "def extract_missing(test_list, strt_val, stop_val):\r\n  res = []\r\n  for sub in test_list:\r\n    if sub[0] > strt_val:\r\n      res.append((strt_val, sub[0]))\r\n      strt_val = sub[1]\r\n    if strt_val < stop_val:\r\n      res.append((strt_val, stop_val))\r\n  return (res) ", "task_id": 110, "test_setup_code": "", "test_list": ["assert extract_missing([(6, 9), (15, 34), (48, 70)], 2, 100) == [(2, 6), (9, 100), (9, 15), (34, 100), (34, 48), (70, 100)]", "assert extract_missing([(7, 2), (15, 19), (38, 50)], 5, 60) == [(5, 7), (2, 60), (2, 15), (19, 60), (19, 38), (50, 60)]", "assert extract_missing([(7, 2), (15, 19), (38, 50)], 1, 52) == [(1, 7), (2, 52), (2, 15), (19, 52), (19, 38), (50, 52)]"], "challenge_test_list": []}
{"text": "Write a function to find common elements in given nested lists. * list item * list item * list item * list item", "code": "def common_in_nested_lists(nestedlist):\r\n    result = list(set.intersection(*map(set, nestedlist)))\r\n    return result", "task_id": 111, "test_setup_code": "", "test_list": ["assert common_in_nested_lists([[12, 18, 23, 25, 45], [7, 12, 18, 24, 28], [1, 5, 8, 12, 15, 16, 18]])==[18, 12]", "assert common_in_nested_lists([[12, 5, 23, 25, 45], [7, 11, 5, 23, 28], [1, 5, 8, 18, 23, 16]])==[5,23]", "assert common_in_nested_lists([[2, 3,4, 1], [4, 5], [6,4, 8],[4, 5], [6, 8,4]])==[4]"], "challenge_test_list": []}
{"text": "Write a python function to find the perimeter of a cylinder.", "code": "def perimeter(diameter,height) : \r\n    return 2*(diameter+height)  ", "task_id": 112, "test_setup_code": "", "test_list": ["assert perimeter(2,4) == 12", "assert perimeter(1,2) == 6", "assert perimeter(3,1) == 8"], "challenge_test_list": []}
{"text": "Write a function to check if a string represents an integer or not.", "code": "def check_integer(text):\r\n text = text.strip()\r\n if len(text) < 1:\r\n    return None\r\n else:\r\n     if all(text[i] in \"0123456789\" for i in range(len(text))):\r\n          return True\r\n     elif (text[0] in \"+-\") and \\\r\n         all(text[i] in \"0123456789\" for i in range(1,len(text))):\r\n         return True\r\n     else:\r\n        return False", "task_id": 113, "test_setup_code": "", "test_list": ["assert check_integer(\"python\")==False", "assert check_integer(\"1\")==True", "assert check_integer(\"12345\")==True"], "challenge_test_list": []}
{"text": "Write a function to assign frequency to each tuple in the given tuple list.", "code": "from collections import Counter \r\ndef assign_freq(test_list):\r\n  res = [(*key, val) for key, val in Counter(test_list).items()]\r\n  return (str(res)) ", "task_id": 114, "test_setup_code": "", "test_list": ["assert assign_freq([(6, 5, 8), (2, 7), (6, 5, 8), (6, 5, 8), (9, ), (2, 7)] ) == '[(6, 5, 8, 3), (2, 7, 2), (9, 1)]'", "assert assign_freq([(4, 2, 4), (7, 1), (4, 8), (4, 2, 4), (9, 2), (7, 1)] ) == '[(4, 2, 4, 2), (7, 1, 2), (4, 8, 1), (9, 2, 1)]'", "assert assign_freq([(11, 13, 10), (17, 21), (4, 2, 3), (17, 21), (9, 2), (4, 2, 3)] ) == '[(11, 13, 10, 1), (17, 21, 2), (4, 2, 3, 2), (9, 2, 1)]'"], "challenge_test_list": []}
{"text": "Write a function to check whether all dictionaries in a list are empty or not.", "code": "def empty_dit(list1):\r\n empty_dit=all(not d for d in list1)\r\n return empty_dit", "task_id": 115, "test_setup_code": "", "test_list": ["assert empty_dit([{},{},{}])==True", "assert empty_dit([{1,2},{},{}])==False", "assert empty_dit({})==True"], "challenge_test_list": []}
{"text": "Write a function to convert a given tuple of positive integers into an integer.", "code": "def tuple_to_int(nums):\r\n    result = int(''.join(map(str,nums)))\r\n    return result", "task_id": 116, "test_setup_code": "", "test_list": ["assert tuple_to_int((1,2,3))==123", "assert tuple_to_int((4,5,6))==456", "assert tuple_to_int((5,6,7))==567"], "challenge_test_list": []}
{"text": "Write a function to convert all possible convertible elements in the list to float.", "code": "def list_to_float(test_list):\r\n  res = []\r\n  for tup in test_list:\r\n    temp = []\r\n    for ele in tup:\r\n      if ele.isalpha():\r\n        temp.append(ele)\r\n      else:\r\n        temp.append(float(ele))\r\n    res.append((temp[0],temp[1])) \r\n  return (str(res)) ", "task_id": 117, "test_setup_code": "", "test_list": ["assert list_to_float( [(\"3\", \"4\"), (\"1\", \"26.45\"), (\"7.32\", \"8\"), (\"4\", \"8\")] ) == '[(3.0, 4.0), (1.0, 26.45), (7.32, 8.0), (4.0, 8.0)]'", "assert list_to_float( [(\"4\", \"4\"), (\"2\", \"27\"), (\"4.12\", \"9\"), (\"7\", \"11\")] ) == '[(4.0, 4.0), (2.0, 27.0), (4.12, 9.0), (7.0, 11.0)]'", "assert list_to_float( [(\"6\", \"78\"), (\"5\", \"26.45\"), (\"1.33\", \"4\"), (\"82\", \"13\")] ) == '[(6.0, 78.0), (5.0, 26.45), (1.33, 4.0), (82.0, 13.0)]'"], "challenge_test_list": []}
{"text": "[link text](https:// [link text](https:// [link text](https://)))write a function to convert a string to a list.", "code": "def string_to_list(string): \r\n    lst = list(string.split(\" \")) \r\n    return lst", "task_id": 118, "test_setup_code": "", "test_list": ["assert string_to_list(\"python programming\")==['python','programming']", "assert string_to_list(\"lists tuples strings\")==['lists','tuples','strings']", "assert string_to_list(\"write a program\")==['write','a','program']"], "challenge_test_list": []}
{"text": "Write a python function to find the element that appears only once in a sorted array.", "code": "def search(arr,n) :\r\n    XOR = 0\r\n    for i in range(n) :\r\n        XOR = XOR ^ arr[i]\r\n    return (XOR)", "task_id": 119, "test_setup_code": "", "test_list": ["assert search([1,1,2,2,3],5) == 3", "assert search([1,1,3,3,4,4,5,5,7,7,8],11) == 8", "assert search([1,2,2,3,3,4,4],7) == 1"], "challenge_test_list": []}
{"text": "Write a function to find the maximum product from the pairs of tuples within a given list.", "code": "def max_product_tuple(list1):\r\n    result_max = max([abs(x * y) for x, y in list1] )\r\n    return result_max", "task_id": 120, "test_setup_code": "", "test_list": ["assert max_product_tuple([(2, 7), (2, 6), (1, 8), (4, 9)] )==36", "assert max_product_tuple([(10,20), (15,2), (5,10)] )==200", "assert max_product_tuple([(11,44), (10,15), (20,5), (12, 9)] )==484"], "challenge_test_list": []}
{"text": "Write a function to find the triplet with sum of the given array", "code": "def check_triplet(A, n, sum, count):\r\n    if count == 3 and sum == 0:\r\n        return True\r\n    if count == 3 or n == 0 or sum < 0:\r\n        return False\r\n    return check_triplet(A, n - 1, sum - A[n - 1], count + 1) or\\\r\n           check_triplet(A, n - 1, sum, count)", "task_id": 121, "test_setup_code": "", "test_list": ["assert check_triplet([2, 7, 4, 0, 9, 5, 1, 3], 8, 6, 0) == True", "assert check_triplet([1, 4, 5, 6, 7, 8, 5, 9], 8, 6, 0) == False", "assert check_triplet([10, 4, 2, 3, 5], 5, 15, 0) == True"], "challenge_test_list": []}
{"text": "Write a function to find n\u2019th smart number.", "code": "MAX = 3000 \r\ndef smartNumber(n): \r\n\tprimes = [0] * MAX \r\n\tresult = [] \r\n\tfor i in range(2, MAX): \r\n\t\tif (primes[i] == 0): \r\n\t\t\tprimes[i] = 1 \r\n\t\t\tj = i * 2 \r\n\t\t\twhile (j < MAX): \r\n\t\t\t\tprimes[j] -= 1 \r\n\t\t\t\tif ( (primes[j] + 3) == 0): \r\n\t\t\t\t\tresult.append(j) \r\n\t\t\t\tj = j + i \r\n\tresult.sort() \r\n\treturn result[n - 1] ", "task_id": 122, "test_setup_code": "", "test_list": ["assert smartNumber(1) == 30", "assert smartNumber(50) == 273", "assert smartNumber(1000) == 2664"], "challenge_test_list": []}
{"text": "Write a function to sum all amicable numbers from 1 to a specified number.", "code": "def amicable_numbers_sum(limit):\r\n    if not isinstance(limit, int):\r\n        return \"Input is not an integer!\"\r\n    if limit < 1:\r\n        return \"Input must be bigger than 0!\"\r\n    amicables = set()\r\n    for num in range(2, limit+1):\r\n        if num in amicables:\r\n            continue\r\n        sum_fact = sum([fact for fact in range(1, num) if num % fact == 0])\r\n        sum_fact2 = sum([fact for fact in range(1, sum_fact) if sum_fact % fact == 0])\r\n        if num == sum_fact2 and num != sum_fact:\r\n            amicables.add(num)\r\n            amicables.add(sum_fact2)\r\n    return sum(amicables)", "task_id": 123, "test_setup_code": "", "test_list": ["assert amicable_numbers_sum(999)==504", "assert amicable_numbers_sum(9999)==31626", "assert amicable_numbers_sum(99)==0"], "challenge_test_list": []}
{"text": "Write a function to get the angle of a complex number.", "code": "import cmath\r\ndef angle_complex(a,b):\r\n  cn=complex(a,b)\r\n  angle=cmath.phase(a+b)\r\n  return angle", "task_id": 124, "test_setup_code": "", "test_list": ["assert angle_complex(0,1j)==1.5707963267948966 ", "assert angle_complex(2,1j)==0.4636476090008061", "assert angle_complex(0,2j)==1.5707963267948966"], "challenge_test_list": []}
{"text": "Write a function to find the maximum difference between the number of 0s and number of 1s in any sub-string of the given binary string.", "code": "def find_length(string, n): \r\n\tcurrent_sum = 0\r\n\tmax_sum = 0\r\n\tfor i in range(n): \r\n\t\tcurrent_sum += (1 if string[i] == '0' else -1) \r\n\t\tif current_sum < 0: \r\n\t\t\tcurrent_sum = 0\r\n\t\tmax_sum = max(current_sum, max_sum) \r\n\treturn max_sum if max_sum else 0", "task_id": 125, "test_setup_code": "", "test_list": ["assert find_length(\"11000010001\", 11) == 6", "assert find_length(\"10111\", 5) == 1", "assert find_length(\"11011101100101\", 14) == 2 "], "challenge_test_list": []}
{"text": "Write a python function to find the sum of common divisors of two given numbers.", "code": "def sum(a,b): \r\n    sum = 0\r\n    for i in range (1,min(a,b)): \r\n        if (a % i == 0 and b % i == 0): \r\n            sum += i \r\n    return sum", "task_id": 126, "test_setup_code": "", "test_list": ["assert sum(10,15) == 6", "assert sum(100,150) == 93", "assert sum(4,6) == 3"], "challenge_test_list": []}
{"text": "Write a function to multiply two integers without using the * operator in python.", "code": "def multiply_int(x, y):\r\n    if y < 0:\r\n        return -multiply_int(x, -y)\r\n    elif y == 0:\r\n        return 0\r\n    elif y == 1:\r\n        return x\r\n    else:\r\n        return x + multiply_int(x, y - 1)", "task_id": 127, "test_setup_code": "", "test_list": ["assert multiply_int(10,20)==200", "assert multiply_int(5,10)==50", "assert multiply_int(4,8)==32"], "challenge_test_list": []}
{"text": "Write a function to shortlist words that are longer than n from a given list of words.", "code": "def long_words(n, str):\r\n    word_len = []\r\n    txt = str.split(\" \")\r\n    for x in txt:\r\n        if len(x) > n:\r\n            word_len.append(x)\r\n    return word_len\t", "task_id": 128, "test_setup_code": "", "test_list": ["assert long_words(3,\"python is a programming language\")==['python','programming','language']", "assert long_words(2,\"writing a program\")==['writing','program']", "assert long_words(5,\"sorting list\")==['sorting']"], "challenge_test_list": []}
{"text": "Write a function to calculate magic square.", "code": "def magic_square_test(my_matrix):\r\n    iSize = len(my_matrix[0])\r\n    sum_list = []\r\n    sum_list.extend([sum (lines) for lines in my_matrix])   \r\n    for col in range(iSize):\r\n        sum_list.append(sum(row[col] for row in my_matrix))\r\n    result1 = 0\r\n    for i in range(0,iSize):\r\n        result1 +=my_matrix[i][i]\r\n    sum_list.append(result1)      \r\n    result2 = 0\r\n    for i in range(iSize-1,-1,-1):\r\n        result2 +=my_matrix[i][i]\r\n    sum_list.append(result2)\r\n    if len(set(sum_list))>1:\r\n        return False\r\n    return True", "task_id": 129, "test_setup_code": "", "test_list": ["assert magic_square_test([[7, 12, 1, 14], [2, 13, 8, 11], [16, 3, 10, 5], [9, 6, 15, 4]])==True", "assert magic_square_test([[2, 7, 6], [9, 5, 1], [4, 3, 8]])==True", "assert magic_square_test([[2, 7, 6], [9, 5, 1], [4, 3, 7]])==False"], "challenge_test_list": []}
{"text": "Write a function to find the item with maximum frequency in a given list.", "code": "from collections import defaultdict\r\ndef max_occurrences(nums):\r\n    dict = defaultdict(int)\r\n    for i in nums:\r\n        dict[i] += 1\r\n    result = max(dict.items(), key=lambda x: x[1]) \r\n    return result", "task_id": 130, "test_setup_code": "", "test_list": ["assert max_occurrences([2,3,8,4,7,9,8,2,6,5,1,6,1,2,3,2,4,6,9,1,2])==(2, 5)", "assert max_occurrences([2,3,8,4,7,9,8,7,9,15,14,10,12,13,16,16,18])==(8, 2)", "assert max_occurrences([10,20,20,30,40,90,80,50,30,20,50,10])==(20, 3)"], "challenge_test_list": []}
{"text": "Write a python function to reverse only the vowels of a given string.", "code": "def reverse_vowels(str1):\r\n\tvowels = \"\"\r\n\tfor char in str1:\r\n\t\tif char in \"aeiouAEIOU\":\r\n\t\t\tvowels += char\r\n\tresult_string = \"\"\r\n\tfor char in str1:\r\n\t\tif char in \"aeiouAEIOU\":\r\n\t\t\tresult_string += vowels[-1]\r\n\t\t\tvowels = vowels[:-1]\r\n\t\telse:\r\n\t\t\tresult_string += char\r\n\treturn result_string", "task_id": 131, "test_setup_code": "", "test_list": ["assert reverse_vowels(\"Python\") == \"Python\"", "assert reverse_vowels(\"USA\") == \"ASU\"", "assert reverse_vowels(\"ab\") == \"ab\""], "challenge_test_list": []}
{"text": "Write a function to convert tuple to a string.", "code": "def tup_string(tup1):\r\n  str =  ''.join(tup1)\r\n  return str", "task_id": 132, "test_setup_code": "", "test_list": ["assert tup_string(('e', 'x', 'e', 'r', 'c', 'i', 's', 'e', 's'))==(\"exercises\")", "assert tup_string(('p','y','t','h','o','n'))==(\"python\")", "assert tup_string(('p','r','o','g','r','a','m'))==(\"program\")"], "challenge_test_list": []}
{"text": "Write a function to calculate the sum of the negative numbers of a given list of numbers using lambda function.", "code": "def sum_negativenum(nums):\r\n  sum_negativenum = list(filter(lambda nums:nums<0,nums))\r\n  return sum(sum_negativenum)", "task_id": 133, "test_setup_code": "", "test_list": ["assert sum_negativenum([2, 4, -6, -9, 11, -12, 14, -5, 17])==-32", "assert sum_negativenum([10,15,-14,13,-18,12,-20])==-52", "assert sum_negativenum([19, -65, 57, 39, 152,-639, 121, 44, 90, -190])==-894"], "challenge_test_list": []}
{"text": "Write a python function to check whether the last element of given array is even or odd after performing an operation p times.", "code": "def check_last (arr,n,p): \r\n    _sum = 0\r\n    for i in range(n): \r\n        _sum = _sum + arr[i] \r\n    if p == 1: \r\n        if _sum % 2 == 0: \r\n            return \"ODD\"\r\n        else: \r\n            return \"EVEN\"\r\n    return \"EVEN\"\r\n      ", "task_id": 134, "test_setup_code": "", "test_list": ["assert check_last([5,7,10],3,1) == \"ODD\"", "assert check_last([2,3],2,3) == \"EVEN\"", "assert check_last([1,2,3],3,1) == \"ODD\""], "challenge_test_list": []}
{"text": "Write a function to find the nth hexagonal number.", "code": "def hexagonal_num(n): \r\n\treturn n*(2*n - 1) ", "task_id": 135, "test_setup_code": "", "test_list": ["assert hexagonal_num(10) == 190", "assert hexagonal_num(5) == 45", "assert hexagonal_num(7) == 91"], "challenge_test_list": []}
{"text": "Write a function to calculate electricity bill.", "code": "def cal_electbill(units):\r\n if(units < 50):\r\n    amount = units * 2.60\r\n    surcharge = 25\r\n elif(units <= 100):\r\n    amount = 130 + ((units - 50) * 3.25)\r\n    surcharge = 35\r\n elif(units <= 200):\r\n    amount = 130 + 162.50 + ((units - 100) * 5.26)\r\n    surcharge = 45\r\n else:\r\n    amount = 130 + 162.50 + 526 + ((units - 200) * 8.45)\r\n    surcharge = 75\r\n total = amount + surcharge\r\n return total", "task_id": 136, "test_setup_code": "", "test_list": ["assert cal_electbill(75)==246.25", "assert cal_electbill(265)==1442.75", "assert cal_electbill(100)==327.5"], "challenge_test_list": []}
{"text": "Write a function to find the ration of zeroes in an array of integers.", "code": "from array import array\r\ndef zero_count(nums):\r\n    n = len(nums)\r\n    n1 = 0\r\n    for x in nums:\r\n        if x == 0:\r\n            n1 += 1\r\n        else:\r\n          None\r\n    return round(n1/n,2)", "task_id": 137, "test_setup_code": "", "test_list": ["assert zero_count([0, 1, 2, -1, -5, 6, 0, -3, -2, 3, 4, 6, 8])==0.15", "assert zero_count([2, 1, 2, -1, -5, 6, 4, -3, -2, 3, 4, 6, 8])==0.00", "assert zero_count([2, 4, -6, -9, 11, -12, 14, -5, 17])==0.00"], "challenge_test_list": []}
{"text": "Write a python function to check whether the given number can be represented as sum of non-zero powers of 2 or not.", "code": "def is_Sum_Of_Powers_Of_Two(n): \r\n    if (n % 2 == 1): \r\n        return False\r\n    else: \r\n        return True", "task_id": 138, "test_setup_code": "", "test_list": ["assert is_Sum_Of_Powers_Of_Two(10) == True", "assert is_Sum_Of_Powers_Of_Two(7) == False", "assert is_Sum_Of_Powers_Of_Two(14) == True"], "challenge_test_list": []}
{"text": "Write a function to find the circumference of a circle.", "code": "def circle_circumference(r):\r\n  perimeter=2*3.1415*r\r\n  return perimeter", "task_id": 139, "test_setup_code": "", "test_list": ["assert circle_circumference(10)==62.830000000000005", "assert circle_circumference(5)==31.415000000000003", "assert circle_circumference(4)==25.132"], "challenge_test_list": []}
{"text": "Write a function to extract elements that occur singly in the given tuple list.", "code": "def extract_singly(test_list):\r\n  res = []\r\n  temp = set()\r\n  for inner in test_list:\r\n    for ele in inner:\r\n      if not ele in temp:\r\n        temp.add(ele)\r\n        res.append(ele)\r\n  return (res) ", "task_id": 140, "test_setup_code": "", "test_list": ["assert extract_singly([(3, 4, 5), (4, 5, 7), (1, 4)]) == [3, 4, 5, 7, 1]", "assert extract_singly([(1, 2, 3), (4, 2, 3), (7, 8)]) == [1, 2, 3, 4, 7, 8]", "assert extract_singly([(7, 8, 9), (10, 11, 12), (10, 11)]) == [7, 8, 9, 10, 11, 12]"], "challenge_test_list": []}
{"text": "Write a function to sort a list of elements using pancake sort.", "code": "def pancake_sort(nums):\r\n    arr_len = len(nums)\r\n    while arr_len > 1:\r\n        mi = nums.index(max(nums[0:arr_len]))\r\n        nums = nums[mi::-1] + nums[mi+1:len(nums)]\r\n        nums = nums[arr_len-1::-1] + nums[arr_len:len(nums)]\r\n        arr_len -= 1\r\n    return nums", "task_id": 141, "test_setup_code": "", "test_list": ["assert pancake_sort([15, 79, 25, 38, 69]) == [15, 25, 38, 69, 79]", "assert pancake_sort([98, 12, 54, 36, 85]) == [12, 36, 54, 85, 98]", "assert pancake_sort([41, 42, 32, 12, 23]) == [12, 23, 32, 41, 42]"], "challenge_test_list": []}
{"text": "Write a function to count the same pair in three given lists.", "code": "def count_samepair(list1,list2,list3):\r\n    result = sum(m == n == o for m, n, o in zip(list1,list2,list3))\r\n    return result", "task_id": 142, "test_setup_code": "", "test_list": ["assert count_samepair([1,2,3,4,5,6,7,8],[2,2,3,1,2,6,7,9],[2,1,3,1,2,6,7,9])==3", "assert count_samepair([1,2,3,4,5,6,7,8],[2,2,3,1,2,6,7,8],[2,1,3,1,2,6,7,8])==4", "assert count_samepair([1,2,3,4,2,6,7,8],[2,2,3,1,2,6,7,8],[2,1,3,1,2,6,7,8])==5"], "challenge_test_list": []}
{"text": "Write a function to find number of lists present in the given tuple.", "code": "def find_lists(Input): \r\n\tif isinstance(Input, list): \r\n\t\treturn 1\r\n\telse: \r\n\t\treturn len(Input) ", "task_id": 143, "test_setup_code": "", "test_list": ["assert find_lists(([1, 2, 3, 4], [5, 6, 7, 8])) == 2", "assert find_lists(([1, 2], [3, 4], [5, 6]))  == 3", "assert find_lists(([9, 8, 7, 6, 5, 4, 3, 2, 1])) == 1"], "challenge_test_list": []}
{"text": "Write a python function to find the sum of absolute differences in all pairs of the given array.", "code": "def sum_Pairs(arr,n): \r\n    sum = 0\r\n    for i in range(n - 1,-1,-1): \r\n        sum += i*arr[i] - (n-1-i) * arr[i] \r\n    return sum", "task_id": 144, "test_setup_code": "", "test_list": ["assert sum_Pairs([1,8,9,15,16],5) == 74", "assert sum_Pairs([1,2,3,4],4) == 10", "assert sum_Pairs([1,2,3,4,5,7,9,11,14],9) == 188"], "challenge_test_list": []}
{"text": "Write a python function to find the maximum difference between any two elements in a given array.", "code": "def max_Abs_Diff(arr,n): \r\n    minEle = arr[0] \r\n    maxEle = arr[0] \r\n    for i in range(1, n): \r\n        minEle = min(minEle,arr[i]) \r\n        maxEle = max(maxEle,arr[i]) \r\n    return (maxEle - minEle) ", "task_id": 145, "test_setup_code": "", "test_list": ["assert max_Abs_Diff((2,1,5,3),4) == 4", "assert max_Abs_Diff((9,3,2,5,1),5) == 8", "assert max_Abs_Diff((3,2,1),3) == 2"], "challenge_test_list": []}
{"text": "Write a function to find the ascii value of total characters in a string.", "code": "def ascii_value_string(str1):\r\n  for i in range(len(str1)):\r\n   return ord(str1[i])", "task_id": 146, "test_setup_code": "", "test_list": ["assert ascii_value_string(\"python\")==112", "assert ascii_value_string(\"Program\")==80", "assert ascii_value_string(\"Language\")==76"], "challenge_test_list": []}
{"text": "Write a function to find the maximum total path sum in the given triangle.", "code": "def max_path_sum(tri, m, n): \r\n\tfor i in range(m-1, -1, -1): \r\n\t\tfor j in range(i+1): \r\n\t\t\tif (tri[i+1][j] > tri[i+1][j+1]): \r\n\t\t\t\ttri[i][j] += tri[i+1][j] \r\n\t\t\telse: \r\n\t\t\t\ttri[i][j] += tri[i+1][j+1] \r\n\treturn tri[0][0]", "task_id": 147, "test_setup_code": "", "test_list": ["assert max_path_sum([[1, 0, 0], [4, 8, 0], [1, 5, 3]], 2, 2) == 14", "assert max_path_sum([[13, 0, 0], [7, 4, 0], [2, 4, 6]], 2, 2) == 24 ", "assert max_path_sum([[2, 0, 0], [11, 18, 0], [21, 25, 33]], 2, 2) == 53"], "challenge_test_list": []}
{"text": "Write a function to divide a number into two parts such that the sum of digits is maximum.", "code": "def sum_digits_single(x) : \r\n    ans = 0\r\n    while x : \r\n        ans += x % 10\r\n        x //= 10  \r\n    return ans \r\ndef closest(x) : \r\n    ans = 0\r\n    while (ans * 10 + 9 <= x) : \r\n        ans = ans * 10 + 9  \r\n    return ans   \r\ndef sum_digits_twoparts(N) : \r\n    A = closest(N)  \r\n    return sum_digits_single(A) + sum_digits_single(N - A) ", "task_id": 148, "test_setup_code": "", "test_list": ["assert sum_digits_twoparts(35)==17", "assert sum_digits_twoparts(7)==7", "assert sum_digits_twoparts(100)==19"], "challenge_test_list": []}
{"text": "Write a function to find the longest subsequence such that the difference between adjacents is one for the given array.", "code": "def longest_subseq_with_diff_one(arr, n): \r\n\tdp = [1 for i in range(n)] \r\n\tfor i in range(n): \r\n\t\tfor j in range(i): \r\n\t\t\tif ((arr[i] == arr[j]+1) or (arr[i] == arr[j]-1)): \r\n\t\t\t\tdp[i] = max(dp[i], dp[j]+1) \r\n\tresult = 1\r\n\tfor i in range(n): \r\n\t\tif (result < dp[i]): \r\n\t\t\tresult = dp[i] \r\n\treturn result", "task_id": 149, "test_setup_code": "", "test_list": ["assert longest_subseq_with_diff_one([1, 2, 3, 4, 5, 3, 2], 7) == 6", "assert longest_subseq_with_diff_one([10, 9, 4, 5, 4, 8, 6], 7) == 3", "assert longest_subseq_with_diff_one([1, 2, 3, 2, 3, 7, 2, 1], 8) == 7"], "challenge_test_list": []}
{"text": "Write a python function to find whether the given number is present in the infinite sequence or not.", "code": "def does_Contain_B(a,b,c): \r\n    if (a == b): \r\n        return True\r\n    if ((b - a) * c > 0 and (b - a) % c == 0): \r\n        return True\r\n    return False", "task_id": 150, "test_setup_code": "", "test_list": ["assert does_Contain_B(1,7,3) == True", "assert does_Contain_B(1,-3,5) == False", "assert does_Contain_B(3,2,5) == False"], "challenge_test_list": []}
{"text": "Write a python function to check whether the given number is co-prime or not.", "code": "def gcd(p,q):\r\n    while q != 0:\r\n        p, q = q,p%q\r\n    return p\r\ndef is_coprime(x,y):\r\n    return gcd(x,y) == 1", "task_id": 151, "test_setup_code": "", "test_list": ["assert is_coprime(17,13) == True", "assert is_coprime(15,21) == False", "assert is_coprime(25,45) == False"], "challenge_test_list": []}
{"text": "Write a function to sort the given array by using merge sort.", "code": "def merge(a,b):\r\n    c = []\r\n    while len(a) != 0 and len(b) != 0:\r\n        if a[0] < b[0]:\r\n            c.append(a[0])\r\n            a.remove(a[0])\r\n        else:\r\n            c.append(b[0])\r\n            b.remove(b[0])\r\n    if len(a) == 0:\r\n        c += b\r\n    else:\r\n        c += a\r\n    return c\r\ndef merge_sort(x):\r\n    if len(x) == 0 or len(x) == 1:\r\n        return x\r\n    else:\r\n        middle = len(x)//2\r\n        a = merge_sort(x[:middle])\r\n        b = merge_sort(x[middle:])\r\n        return merge(a,b)\r\n", "task_id": 152, "test_setup_code": "", "test_list": ["assert merge_sort([3, 4, 2, 6, 5, 7, 1, 9]) == [1, 2, 3, 4, 5, 6, 7, 9]", "assert merge_sort([7, 25, 45, 78, 11, 33, 19]) == [7, 11, 19, 25, 33, 45, 78]", "assert merge_sort([3, 1, 4, 9, 8]) == [1, 3, 4, 8, 9]"], "challenge_test_list": []}
{"text": "Write a function to find the vertex of a parabola.", "code": "def parabola_vertex(a, b, c): \r\n  vertex=(((-b / (2 * a)),(((4 * a * c) - (b * b)) / (4 * a))))\r\n  return vertex", "task_id": 153, "test_setup_code": "", "test_list": ["assert parabola_vertex(5,3,2)==(-0.3, 1.55)", "assert parabola_vertex(9,8,4)==(-0.4444444444444444, 2.2222222222222223)", "assert parabola_vertex(2,4,6)==(-1.0, 4.0)"], "challenge_test_list": []}
{"text": "Write a function to extract every specified element from a given two dimensional list.", "code": "def specified_element(nums, N):\r\n    result = [i[N] for i in nums]\r\n    return result", "task_id": 154, "test_setup_code": "", "test_list": ["assert specified_element([[1, 2, 3, 2], [4, 5, 6, 2], [7, 1, 9, 5]],0)==[1, 4, 7]", "assert specified_element([[1, 2, 3, 2], [4, 5, 6, 2], [7, 1, 9, 5]],2)==[3, 6, 9]", "assert specified_element([[1, 2, 3, 2], [4, 5, 6, 2], [7, 1, 9, 5]],3)==[2,2,5]"], "challenge_test_list": []}
{"text": "Write a python function to toggle all even bits of a given number.", "code": "def even_bit_toggle_number(n) : \r\n    res = 0; count = 0; temp = n \r\n    while (temp > 0) :     \r\n        if (count % 2 == 1) : \r\n            res = res | (1 << count)      \r\n        count = count + 1\r\n        temp >>= 1 \r\n    return n ^ res ", "task_id": 155, "test_setup_code": "", "test_list": ["assert even_bit_toggle_number(10) == 0", "assert even_bit_toggle_number(20) == 30", "assert even_bit_toggle_number(30) == 20"], "challenge_test_list": []}
{"text": "Write a function to convert a tuple of string values to a tuple of integer values.", "code": "def tuple_int_str(tuple_str):\r\n    result = tuple((int(x[0]), int(x[1])) for x in tuple_str)\r\n    return result", "task_id": 156, "test_setup_code": "", "test_list": ["assert tuple_int_str((('333', '33'), ('1416', '55')))==((333, 33), (1416, 55))", "assert tuple_int_str((('999', '99'), ('1000', '500')))==((999, 99), (1000, 500))", "assert tuple_int_str((('666', '66'), ('1500', '555')))==((666, 66), (1500, 555))"], "challenge_test_list": []}
{"text": "Write a function to reflect the run-length encoding from a list.", "code": "from itertools import groupby\r\ndef encode_list(list1):\r\n    return [[len(list(group)), key] for key, group in groupby(list1)]", "task_id": 157, "test_setup_code": "", "test_list": ["assert encode_list([1,1,2,3,4,4.3,5,1])==[[2, 1], [1, 2], [1, 3], [1, 4], [1, 4.3], [1, 5], [1, 1]]", "assert encode_list('automatically')==[[1, 'a'], [1, 'u'], [1, 't'], [1, 'o'], [1, 'm'], [1, 'a'], [1, 't'], [1, 'i'], [1, 'c'], [1, 'a'], [2, 'l'], [1, 'y']]", "assert encode_list('python')==[[1, 'p'], [1, 'y'], [1, 't'], [1, 'h'], [1, 'o'], [1, 'n']]"], "challenge_test_list": []}
{"text": "Write a python function to find k number of operations required to make all elements equal.", "code": "def min_Ops(arr,n,k): \r\n    max1 = max(arr) \r\n    res = 0\r\n    for i in range(0,n):  \r\n        if ((max1 - arr[i]) % k != 0): \r\n            return -1 \r\n        else: \r\n            res += (max1 - arr[i]) / k \r\n    return int(res) ", "task_id": 158, "test_setup_code": "", "test_list": ["assert min_Ops([2,2,2,2],4,3) == 0", "assert min_Ops([4,2,6,8],4,3) == -1", "assert min_Ops([21,33,9,45,63],5,6) == 24"], "challenge_test_list": []}
{"text": "Write a function to print the season for the given month and day.", "code": "def month_season(month,days):\r\n if month in ('January', 'February', 'March'):\r\n\t season = 'winter'\r\n elif month in ('April', 'May', 'June'):\r\n\t season = 'spring'\r\n elif month in ('July', 'August', 'September'):\r\n\t season = 'summer'\r\n else:\r\n\t season = 'autumn'\r\n if (month == 'March') and (days > 19):\r\n\t season = 'spring'\r\n elif (month == 'June') and (days > 20):\r\n\t season = 'summer'\r\n elif (month == 'September') and (days > 21):\r\n\t season = 'autumn'\r\n elif (month == 'October') and (days > 21):\r\n\t season = 'autumn'\r\n elif (month == 'November') and (days > 21):\r\n\t season = 'autumn'\r\n elif (month == 'December') and (days > 20):\r\n\t season = 'winter'\r\n return season", "task_id": 159, "test_setup_code": "", "test_list": ["assert month_season('January',4)==('winter')", "assert month_season('October',28)==('autumn')", "assert month_season('June',6)==('spring')"], "challenge_test_list": []}
{"text": "Write a function to find x and y that satisfies ax + by = n.", "code": "def solution (a, b, n): \r\n\ti = 0\r\n\twhile i * a <= n: \r\n\t\tif (n - (i * a)) % b == 0: \r\n\t\t\treturn (\"x = \",i ,\", y = \", \r\n\t\t\tint((n - (i * a)) / b)) \r\n\t\t\treturn 0\r\n\t\ti = i + 1\r\n\treturn (\"No solution\") ", "task_id": 160, "test_setup_code": "", "test_list": ["assert solution(2, 3, 7) == ('x = ', 2, ', y = ', 1)", "assert solution(4, 2, 7) == 'No solution'", "assert solution(1, 13, 17) == ('x = ', 4, ', y = ', 1)"], "challenge_test_list": []}
{"text": "Write a function to remove all elements from a given list present in another list.", "code": "def remove_elements(list1, list2):\r\n    result = [x for x in list1 if x not in list2]\r\n    return result", "task_id": 161, "test_setup_code": "", "test_list": ["assert remove_elements([1,2,3,4,5,6,7,8,9,10],[2,4,6,8])==[1, 3, 5, 7, 9, 10]", "assert remove_elements([1, 2, 3, 4, 5, 6, 7, 8, 9, 10],[1, 3, 5, 7])==[2, 4, 6, 8, 9, 10]", "assert remove_elements([1, 2, 3, 4, 5, 6, 7, 8, 9, 10],[5,7])==[1, 2, 3, 4, 6, 8, 9, 10]"], "challenge_test_list": []}
{"text": "Write a function to calculate the sum of the positive integers of n+(n-2)+(n-4)... (until n-x =< 0).", "code": "def sum_series(n):\r\n  if n < 1:\r\n    return 0\r\n  else:\r\n    return n + sum_series(n - 2)", "task_id": 162, "test_setup_code": "", "test_list": ["assert sum_series(6)==12", "assert sum_series(10)==30", "assert sum_series(9)==25"], "challenge_test_list": []}
{"text": "Write a function to calculate the area of a regular polygon.", "code": "from math import tan, pi\r\ndef area_polygon(s,l):\r\n  area = s * (l ** 2) / (4 * tan(pi / s))\r\n  return area", "task_id": 163, "test_setup_code": "", "test_list": ["assert area_polygon(4,20)==400.00000000000006", "assert area_polygon(10,15)==1731.1969896610804", "assert area_polygon(9,7)==302.90938549487214"], "challenge_test_list": []}
{"text": "Write a python function to check whether the sum of divisors are same or not.", "code": "import math \r\ndef divSum(n): \r\n    sum = 1; \r\n    i = 2; \r\n    while(i * i <= n): \r\n        if (n % i == 0): \r\n            sum = (sum + i +math.floor(n / i)); \r\n        i += 1; \r\n    return sum; \r\ndef areEquivalent(num1,num2): \r\n    return divSum(num1) == divSum(num2); ", "task_id": 164, "test_setup_code": "", "test_list": ["assert areEquivalent(36,57) == False", "assert areEquivalent(2,4) == False", "assert areEquivalent(23,47) == True"], "challenge_test_list": []}
{"text": "Write a python function to count characters at same position in a given string (lower and uppercase characters) as in english alphabet.", "code": "def count_char_position(str1): \r\n    count_chars = 0\r\n    for i in range(len(str1)):\r\n        if ((i == ord(str1[i]) - ord('A')) or \r\n            (i == ord(str1[i]) - ord('a'))): \r\n            count_chars += 1\r\n    return count_chars ", "task_id": 165, "test_setup_code": "", "test_list": ["assert count_char_position(\"xbcefg\") == 2", "assert count_char_position(\"ABcED\") == 3", "assert count_char_position(\"AbgdeF\") == 5"], "challenge_test_list": []}
{"text": "Write a python function to count the pairs with xor as an even number.", "code": "def find_even_Pair(A,N): \r\n    evenPair = 0\r\n    for i in range(0,N): \r\n        for j in range(i+1,N): \r\n            if ((A[i] ^ A[j]) % 2 == 0): \r\n                evenPair+=1\r\n    return evenPair; ", "task_id": 166, "test_setup_code": "", "test_list": ["assert find_even_Pair([5,4,7,2,1],5) == 4", "assert find_even_Pair([7,2,8,1,0,5,11],7) == 9", "assert find_even_Pair([1,2,3],3) == 1"], "challenge_test_list": []}
{"text": "Write a python function to find smallest power of 2 greater than or equal to n.", "code": "def next_Power_Of_2(n): \r\n    count = 0; \r\n    if (n and not(n & (n - 1))): \r\n        return n   \r\n    while( n != 0): \r\n        n >>= 1\r\n        count += 1\r\n    return 1 << count; ", "task_id": 167, "test_setup_code": "", "test_list": ["assert next_Power_Of_2(0) == 1", "assert next_Power_Of_2(5) == 8", "assert next_Power_Of_2(17) == 32"], "challenge_test_list": []}
{"text": "Write a python function to find the frequency of a number in a given array.", "code": "def frequency(a,x): \r\n    count = 0  \r\n    for i in a: \r\n        if i == x: count += 1\r\n    return count ", "task_id": 168, "test_setup_code": "", "test_list": ["assert frequency([1,2,3],4) == 0", "assert frequency([1,2,2,3,3,3,4],3) == 3", "assert frequency([0,1,2,3,1,2],1) == 2"], "challenge_test_list": []}
{"text": "Write a function to calculate the nth pell number.", "code": "def get_pell(n): \r\n\tif (n <= 2): \r\n\t\treturn n \r\n\ta = 1\r\n\tb = 2\r\n\tfor i in range(3, n+1): \r\n\t\tc = 2 * b + a \r\n\t\ta = b \r\n\t\tb = c \r\n\treturn b ", "task_id": 169, "test_setup_code": "", "test_list": ["assert get_pell(4) == 12", "assert get_pell(7) == 169", "assert get_pell(8) == 408"], "challenge_test_list": []}
{"text": "Write a function to find sum of the numbers in a list between the indices of a specified range.", "code": "def sum_range_list(list1, m, n):                                                                                                                                                                                                \r\n    sum_range = 0                                                                                                                                                                                                         \r\n    for i in range(m, n+1, 1):                                                                                                                                                                                        \r\n        sum_range += list1[i]                                                                                                                                                                                                  \r\n    return sum_range   ", "task_id": 170, "test_setup_code": "", "test_list": ["assert sum_range_list( [2,1,5,6,8,3,4,9,10,11,8,12],8,10)==29", "assert sum_range_list( [2,1,5,6,8,3,4,9,10,11,8,12],5,7)==16", "assert sum_range_list( [2,1,5,6,8,3,4,9,10,11,8,12],7,10)==38"], "challenge_test_list": []}
{"text": "Write a function to find the perimeter of a pentagon.", "code": "import math\r\ndef perimeter_pentagon(a):\r\n  perimeter=(5*a)\r\n  return perimeter", "task_id": 171, "test_setup_code": "", "test_list": ["assert perimeter_pentagon(5)==25", "assert perimeter_pentagon(10)==50", "assert perimeter_pentagon(15)==75"], "challenge_test_list": []}
{"text": "Write a function to find the occurence of characters 'std' in the given string 1. list item 1. list item 1. list item 2. list item 2. list item 2. list item", "code": "def count_occurance(s):\r\n  count=0\r\n  for i in range(len(s)):\r\n    if (s[i]== 's' and s[i+1]=='t' and s[i+2]== 'd'):\r\n      count = count + 1\r\n  return count", "task_id": 172, "test_setup_code": "", "test_list": ["assert count_occurance(\"letstdlenstdporstd\") == 3", "assert count_occurance(\"truststdsolensporsd\") == 1", "assert count_occurance(\"makestdsostdworthit\") == 2"], "challenge_test_list": []}
{"text": "Write a function to remove everything except alphanumeric characters from a string.", "code": "import re\r\ndef remove_splchar(text): \r\n pattern = re.compile('[\\W_]+')\r\n return (pattern.sub('', text))", "task_id": 173, "test_setup_code": "", "test_list": ["assert remove_splchar('python  @#&^%$*program123')==('pythonprogram123')", "assert remove_splchar('python %^$@!^&*()  programming24%$^^()    language')==('pythonprogramming24language')", "assert remove_splchar('python   ^%&^()(+_)(_^&67)                  program')==('python67program')"], "challenge_test_list": []}
{"text": "Write a function to group a sequence of key-value pairs into a dictionary of lists.", "code": "def group_keyvalue(l):\r\n    result = {}\r\n    for k, v in l:\r\n         result.setdefault(k, []).append(v)\r\n    return result", "task_id": 174, "test_setup_code": "", "test_list": ["assert group_keyvalue([('yellow', 1), ('blue', 2), ('yellow', 3), ('blue', 4), ('red', 1)])=={'yellow': [1, 3], 'blue': [2, 4], 'red': [1]}", "assert group_keyvalue([('python', 1), ('python', 2), ('python', 3), ('python', 4), ('python', 5)])=={'python': [1,2,3,4,5]}", "assert group_keyvalue([('yellow',100), ('blue', 200), ('yellow', 300), ('blue', 400), ('red', 100)])=={'yellow': [100, 300], 'blue': [200, 400], 'red': [100]}"], "challenge_test_list": []}
{"text": "Write a function to verify validity of a string of parentheses.", "code": "def is_valid_parenthese( str1):\r\n        stack, pchar = [], {\"(\": \")\", \"{\": \"}\", \"[\": \"]\"}\r\n        for parenthese in str1:\r\n            if parenthese in pchar:\r\n                stack.append(parenthese)\r\n            elif len(stack) == 0 or pchar[stack.pop()] != parenthese:\r\n                return False\r\n        return len(stack) == 0", "task_id": 175, "test_setup_code": "", "test_list": ["assert is_valid_parenthese(\"(){}[]\")==True", "assert is_valid_parenthese(\"()[{)}\")==False", "assert is_valid_parenthese(\"()\")==True"], "challenge_test_list": []}
{"text": "Write a function to find the perimeter of a triangle.", "code": "def perimeter_triangle(a,b,c):\r\n  perimeter=a+b+c\r\n  return perimeter", "task_id": 176, "test_setup_code": "", "test_list": ["assert perimeter_triangle(10,20,30)==60", "assert perimeter_triangle(3,4,5)==12", "assert perimeter_triangle(25,35,45)==105"], "challenge_test_list": []}
{"text": "Write a python function to find two distinct numbers such that their lcm lies within the given range.", "code": "def answer(L,R): \r\n    if (2 * L <= R): \r\n        return (L ,2*L)\r\n    else: \r\n        return (-1) ", "task_id": 177, "test_setup_code": "", "test_list": ["assert answer(3,8) == (3,6)", "assert answer(2,6) == (2,4)", "assert answer(1,3) == (1,2)"], "challenge_test_list": []}
{"text": "Write a function to search some literals strings in a string.", "code": "import re\r\ndef string_literals(patterns,text):\r\n  for pattern in patterns:\r\n     if re.search(pattern,  text):\r\n       return ('Matched!')\r\n     else:\r\n       return ('Not Matched!')", "task_id": 178, "test_setup_code": "", "test_list": ["assert string_literals(['language'],'python language')==('Matched!')", "assert string_literals(['program'],'python language')==('Not Matched!')", "assert string_literals(['python'],'programming language')==('Not Matched!')"], "challenge_test_list": []}
{"text": "Write a function to find if the given number is a keith number or not.", "code": "def is_num_keith(x): \r\n\tterms = [] \r\n\ttemp = x \r\n\tn = 0 \r\n\twhile (temp > 0): \r\n\t\tterms.append(temp % 10) \r\n\t\ttemp = int(temp / 10) \r\n\t\tn+=1 \r\n\tterms.reverse() \r\n\tnext_term = 0 \r\n\ti = n \r\n\twhile (next_term < x): \r\n\t\tnext_term = 0 \r\n\t\tfor j in range(1,n+1): \r\n\t\t\tnext_term += terms[i - j] \r\n\t\tterms.append(next_term) \r\n\t\ti+=1 \r\n\treturn (next_term == x) ", "task_id": 179, "test_setup_code": "", "test_list": ["assert is_num_keith(14) == True", "assert is_num_keith(12) == False", "assert is_num_keith(197) == True"], "challenge_test_list": []}
{"text": "Write a function to calculate distance between two points using latitude and longitude.", "code": "from math import radians, sin, cos, acos\r\ndef distance_lat_long(slat,slon,elat,elon):\r\n dist = 6371.01 * acos(sin(slat)*sin(elat) + cos(slat)*cos(elat)*cos(slon - elon))\r\n return dist", "task_id": 180, "test_setup_code": "", "test_list": ["assert distance_lat_long(23.5,67.5,25.5,69.5)==12179.372041317429", "assert distance_lat_long(10.5,20.5,30.5,40.5)==6069.397933300514", "assert distance_lat_long(10,20,30,40)==6783.751974994595"], "challenge_test_list": []}
{"text": "Write a function to find the longest common prefix in the given set of strings.", "code": "def common_prefix_util(str1, str2): \r\n\tresult = \"\"; \r\n\tn1 = len(str1) \r\n\tn2 = len(str2) \r\n\ti = 0\r\n\tj = 0\r\n\twhile i <= n1 - 1 and j <= n2 - 1: \r\n\t\tif (str1[i] != str2[j]): \r\n\t\t\tbreak\r\n\t\tresult += str1[i] \r\n\t\ti += 1\r\n\t\tj += 1\r\n\treturn (result) \r\ndef common_prefix (arr, n): \r\n\tprefix = arr[0] \r\n\tfor i in range (1, n): \r\n\t\tprefix = common_prefix_util(prefix, arr[i]) \r\n\treturn (prefix) ", "task_id": 181, "test_setup_code": "", "test_list": ["assert common_prefix([\"tablets\", \"tables\", \"taxi\", \"tamarind\"], 4) == 'ta'", "assert common_prefix([\"apples\", \"ape\", \"april\"], 3) == 'ap'", "assert common_prefix([\"teens\", \"teenager\", \"teenmar\"], 3) == 'teen'"], "challenge_test_list": []}
{"text": "Write a function to find uppercase, lowercase, special character and numeric values using regex.", "code": "import re\r\ndef find_character(string):\r\n  uppercase_characters = re.findall(r\"[A-Z]\", string) \r\n  lowercase_characters = re.findall(r\"[a-z]\", string) \r\n  numerical_characters = re.findall(r\"[0-9]\", string) \r\n  special_characters = re.findall(r\"[, .!?]\", string) \r\n  return uppercase_characters, lowercase_characters, numerical_characters, special_characters", "task_id": 182, "test_setup_code": "", "test_list": ["assert find_character(\"ThisIsGeeksforGeeks\") == (['T', 'I', 'G', 'G'], ['h', 'i', 's', 's', 'e', 'e', 'k', 's', 'f', 'o', 'r', 'e', 'e', 'k', 's'], [], [])", "assert find_character(\"Hithere2\") == (['H'], ['i', 't', 'h', 'e', 'r', 'e'], ['2'], [])", "assert find_character(\"HeyFolks32\") == (['H', 'F'], ['e', 'y', 'o', 'l', 'k', 's'], ['3', '2'], [])"], "challenge_test_list": []}
{"text": "Write a function to count all the distinct pairs having a difference of k in any array.", "code": "def count_pairs(arr, n, k):\r\n  count=0;\r\n  for i in range(0,n):\r\n    for j in range(i+1, n):\r\n      if arr[i] - arr[j] == k or arr[j] - arr[i] == k:\r\n        count += 1\r\n  return count", "task_id": 183, "test_setup_code": "", "test_list": ["assert count_pairs([1, 5, 3, 4, 2], 5, 3) == 2", "assert count_pairs([8, 12, 16, 4, 0, 20], 6, 4) == 5", "assert count_pairs([2, 4, 1, 3, 4], 5, 2) == 3"], "challenge_test_list": []}
{"text": "Write a function to find all the values in a list that are greater than a specified number.", "code": "def greater_specificnum(list,num):\r\n greater_specificnum=all(x >= num for x in list)\r\n return greater_specificnum", "task_id": 184, "test_setup_code": "", "test_list": ["assert greater_specificnum([220, 330, 500],200)==True", "assert greater_specificnum([12, 17, 21],20)==False", "assert greater_specificnum([1,2,3,4],10)==False"], "challenge_test_list": []}
{"text": "Write a function to find the focus of a parabola.", "code": "def parabola_focus(a, b, c): \r\n  focus= (((-b / (2 * a)),(((4 * a * c) - (b * b) + 1) / (4 * a))))\r\n  return focus", "task_id": 185, "test_setup_code": "", "test_list": ["assert parabola_focus(5,3,2)==(-0.3, 1.6)", "assert parabola_focus(9,8,4)==(-0.4444444444444444, 2.25)", "assert parabola_focus(2,4,6)==(-1.0, 4.125)"], "challenge_test_list": []}
{"text": "Write a function to search some literals strings in a string by using regex.", "code": "import re\r\ndef check_literals(text, patterns):\r\n  for pattern in patterns:\r\n    if re.search(pattern,  text):\r\n        return ('Matched!')\r\n    else:\r\n        return ('Not Matched!')", "task_id": 186, "test_setup_code": "", "test_list": ["assert check_literals('The quick brown fox jumps over the lazy dog.',['fox']) == 'Matched!'", "assert check_literals('The quick brown fox jumps over the lazy dog.',['horse']) == 'Not Matched!'", "assert check_literals('The quick brown fox jumps over the lazy dog.',['lazy']) == 'Matched!'"], "challenge_test_list": []}
{"text": "Write a function to find the longest common subsequence for the given two sequences.", "code": "def longest_common_subsequence(X, Y, m, n): \r\n    if m == 0 or n == 0: \r\n       return 0 \r\n    elif X[m-1] == Y[n-1]: \r\n       return 1 + longest_common_subsequence(X, Y, m-1, n-1) \r\n    else: \r\n       return max(longest_common_subsequence(X, Y, m, n-1), longest_common_subsequence(X, Y, m-1, n))", "task_id": 187, "test_setup_code": "", "test_list": ["assert longest_common_subsequence(\"AGGTAB\" , \"GXTXAYB\", 6, 7) == 4", "assert longest_common_subsequence(\"ABCDGH\" , \"AEDFHR\", 6, 6) == 3", "assert longest_common_subsequence(\"AXYT\" , \"AYZX\", 4, 4) == 2"], "challenge_test_list": []}
{"text": "Write a python function to check whether the given number can be represented by product of two squares or not.", "code": "def prod_Square(n):\r\n    for i in range(2,(n) + 1):\r\n        if (i*i < (n+1)):\r\n            for j in range(2,n + 1):\r\n                if ((i*i*j*j) == n):\r\n                    return True;\r\n    return False;", "task_id": 188, "test_setup_code": "", "test_list": ["assert prod_Square(25) == False", "assert prod_Square(30) == False", "assert prod_Square(16) == True"], "challenge_test_list": []}
{"text": "Write a python function to find the first missing positive number.", "code": "def first_Missing_Positive(arr,n): \r\n    ptr = 0\r\n    for i in range(n):\r\n        if arr[i] == 1:\r\n            ptr = 1\r\n            break\r\n    if ptr == 0:\r\n        return(1)\r\n    for i in range(n):\r\n        if arr[i] <= 0 or arr[i] > n:\r\n            arr[i] = 1\r\n    for i in range(n):\r\n        arr[(arr[i] - 1) % n] += n\r\n    for i in range(n):\r\n        if arr[i] <= n:\r\n            return(i + 1)\r\n    return(n + 1)", "task_id": 189, "test_setup_code": "", "test_list": ["assert first_Missing_Positive([1,2,3,-1,5],5) == 4", "assert first_Missing_Positive([0,-1,-2,1,5,8],6) == 2", "assert first_Missing_Positive([0,1,2,5,-8],5) == 3"], "challenge_test_list": []}
{"text": "Write a python function to count the number of integral co-ordinates that lie inside a square.", "code": "def count_Intgral_Points(x1,y1,x2,y2): \r\n    return ((y2 - y1 - 1) * (x2 - x1 - 1)) ", "task_id": 190, "test_setup_code": "", "test_list": ["assert count_Intgral_Points(1,1,4,4) == 4", "assert count_Intgral_Points(1,2,1,2) == 1", "assert count_Intgral_Points(4,2,6,4) == 1"], "challenge_test_list": []}
{"text": "Write a function to check whether the given month name contains 30 days or not.", "code": "def check_monthnumber(monthname3):\r\n  if monthname3 ==\"April\" or monthname3== \"June\" or monthname3== \"September\" or monthname3== \"November\":\r\n    return True\r\n  else:\r\n    return False", "task_id": 191, "test_setup_code": "", "test_list": ["assert check_monthnumber(\"February\")==False", "assert check_monthnumber(\"June\")==True", "assert check_monthnumber(\"April\")==True"], "challenge_test_list": []}
{"text": "Write a python function to check whether a string has atleast one letter and one number.", "code": "def check_String(str): \r\n    flag_l = False\r\n    flag_n = False\r\n    for i in str: \r\n        if i.isalpha(): \r\n            flag_l = True  \r\n        if i.isdigit(): \r\n            flag_n = True\r\n    return flag_l and flag_n ", "task_id": 192, "test_setup_code": "", "test_list": ["assert check_String('thishasboth29') == True", "assert check_String('python') == False", "assert check_String ('string') == False"], "challenge_test_list": []}
{"text": "Write a function to remove the duplicates from the given tuple.", "code": "def remove_tuple(test_tup):\r\n  res = tuple(set(test_tup))\r\n  return (res) ", "task_id": 193, "test_setup_code": "", "test_list": ["assert remove_tuple((1, 3, 5, 2, 3, 5, 1, 1, 3)) == (1, 2, 3, 5)", "assert remove_tuple((2, 3, 4, 4, 5, 6, 6, 7, 8, 8)) == (2, 3, 4, 5, 6, 7, 8)", "assert remove_tuple((11, 12, 13, 11, 11, 12, 14, 13)) == (11, 12, 13, 14)"], "challenge_test_list": []}
{"text": "Write a python function to convert octal number to decimal number.", "code": "def octal_To_Decimal(n):  \r\n    num = n; \r\n    dec_value = 0; \r\n    base = 1; \r\n    temp = num; \r\n    while (temp): \r\n        last_digit = temp % 10; \r\n        temp = int(temp / 10); \r\n        dec_value += last_digit*base; \r\n        base = base * 8; \r\n    return dec_value; ", "task_id": 194, "test_setup_code": "", "test_list": ["assert octal_To_Decimal(25) == 21", "assert octal_To_Decimal(30) == 24", "assert octal_To_Decimal(40) == 32"], "challenge_test_list": []}
{"text": "Write a python function to find the first position of an element in a sorted array.", "code": "def first(arr,x,n): \r\n    low = 0\r\n    high = n - 1\r\n    res = -1  \r\n    while (low <= high):\r\n        mid = (low + high) // 2 \r\n        if arr[mid] > x:\r\n            high = mid - 1\r\n        elif arr[mid] < x:\r\n            low = mid + 1\r\n        else:\r\n            res = mid\r\n            high = mid - 1\r\n    return res", "task_id": 195, "test_setup_code": "", "test_list": ["assert first([1,2,3,4,5,6,6],6,6) == 5", "assert first([1,2,2,2,3,2,2,4,2],2,9) == 1", "assert first([1,2,3],1,3) == 0"], "challenge_test_list": []}
{"text": "Write a function to remove all the tuples with length k.", "code": "def remove_tuples(test_list, K):\r\n  res = [ele for ele in test_list if len(ele) != K]\r\n  return (res) ", "task_id": 196, "test_setup_code": "", "test_list": ["assert remove_tuples([(4, 5), (4, ), (8, 6, 7), (1, ), (3, 4, 6, 7)] , 1) == [(4, 5), (8, 6, 7), (3, 4, 6, 7)]", "assert remove_tuples([(4, 5), (4,5), (6, 7), (1, 2, 3), (3, 4, 6, 7)] ,2) == [(1, 2, 3), (3, 4, 6, 7)]", "assert remove_tuples([(1, 4, 4), (4, 3), (8, 6, 7), (1, ), (3, 6, 7)] , 3) == [(4, 3), (1,)]"], "challenge_test_list": []}
{"text": "Write a function to perform the exponentiation of the given two tuples.", "code": "def find_exponentio(test_tup1, test_tup2):\r\n  res = tuple(ele1 ** ele2 for ele1, ele2 in zip(test_tup1, test_tup2))\r\n  return (res)\r\n", "task_id": 197, "test_setup_code": "", "test_list": ["assert find_exponentio((10, 4, 5, 6), (5, 6, 7, 5)) == (100000, 4096, 78125, 7776)", "assert find_exponentio((11, 5, 6, 7), (6, 7, 8, 6)) == (1771561, 78125, 1679616, 117649)", "assert find_exponentio((12, 6, 7, 8), (7, 8, 9, 7)) == (35831808, 1679616, 40353607, 2097152)"], "challenge_test_list": []}
{"text": "Write a function to find the largest triangle that can be inscribed in an ellipse.", "code": "import math\r\ndef largest_triangle(a,b): \r\n    if (a < 0 or b < 0): \r\n        return -1 \r\n    area = (3 * math.sqrt(3) * pow(a, 2)) / (4 * b);  \r\n    return area ", "task_id": 198, "test_setup_code": "", "test_list": ["assert largest_triangle(4,2)==10.392304845413264", "assert largest_triangle(5,7)==4.639421805988064", "assert largest_triangle(9,1)==105.2220865598093"], "challenge_test_list": []}
{"text": "Write a python function to find highest power of 2 less than or equal to given number.", "code": "def highest_Power_of_2(n): \r\n    res = 0; \r\n    for i in range(n, 0, -1):  \r\n        if ((i & (i - 1)) == 0): \r\n            res = i; \r\n            break;      \r\n    return res; ", "task_id": 199, "test_setup_code": "", "test_list": ["assert highest_Power_of_2(10) == 8", "assert highest_Power_of_2(19) == 16", "assert highest_Power_of_2(32) == 32"], "challenge_test_list": []}
{"text": "Write a function to find all index positions of the maximum values in a given list.", "code": "def position_max(list1):\r\n    max_val = max(list1)\r\n    max_result = [i for i, j in enumerate(list1) if j == max_val]\r\n    return max_result", "task_id": 200, "test_setup_code": "", "test_list": ["assert position_max([12,33,23,10,67,89,45,667,23,12,11,10,54])==[7]", "assert position_max([1,2,2,2,4,4,4,5,5,5,5])==[7,8,9,10]", "assert position_max([2,1,5,6,8,3,4,9,10,11,8,12])==[11]"], "challenge_test_list": []}
{"text": "Write a python function to check whether the elements in a list are same or not.", "code": "def chkList(lst): \r\n    return len(set(lst)) == 1", "task_id": 201, "test_setup_code": "", "test_list": ["assert chkList(['one','one','one']) == True", "assert chkList(['one','Two','Three']) == False", "assert chkList(['bigdata','python','Django']) == False"], "challenge_test_list": []}
{"text": "Write a function to remove even characters in a string.", "code": "def remove_even(str1):\r\n str2 = ''\r\n for i in range(1, len(str1) + 1):\r\n    if(i % 2 != 0):\r\n        str2 = str2 + str1[i - 1]\r\n return str2", "task_id": 202, "test_setup_code": "", "test_list": ["assert remove_even(\"python\")==(\"pto\")", "assert remove_even(\"program\")==(\"porm\")", "assert remove_even(\"language\")==(\"lnug\")"], "challenge_test_list": []}
{"text": "Write a python function to find the hamming distance between given two integers.", "code": "def hamming_Distance(n1,n2) : \r\n    x = n1 ^ n2  \r\n    setBits = 0\r\n    while (x > 0) : \r\n        setBits += x & 1\r\n        x >>= 1\r\n    return setBits  ", "task_id": 203, "test_setup_code": "", "test_list": ["assert hamming_Distance(4,8) == 2", "assert hamming_Distance(2,4) == 2", "assert hamming_Distance(1,2) == 2"], "challenge_test_list": []}
{"text": "Write a python function to count the occurrence of a given character in a string.", "code": "def count(s,c) : \r\n    res = 0 \r\n    for i in range(len(s)) : \r\n        if (s[i] == c): \r\n            res = res + 1\r\n    return res ", "task_id": 204, "test_setup_code": "", "test_list": ["assert count(\"abcc\",\"c\") == 2", "assert count(\"ababca\",\"a\") == 3", "assert count(\"mnmm0pm\",\"m\") == 4"], "challenge_test_list": []}
{"text": "Write a function to find the inversions of tuple elements in the given tuple list.", "code": "def inversion_elements(test_tup):\r\n  res = tuple(list(map(lambda x: ~x, list(test_tup))))\r\n  return (res) ", "task_id": 205, "test_setup_code": "", "test_list": ["assert inversion_elements((7, 8, 9, 1, 10, 7)) == (-8, -9, -10, -2, -11, -8)", "assert inversion_elements((2, 4, 5, 6, 1, 7)) == (-3, -5, -6, -7, -2, -8)", "assert inversion_elements((8, 9, 11, 14, 12, 13)) == (-9, -10, -12, -15, -13, -14)"], "challenge_test_list": []}
{"text": "Write a function to perform the adjacent element concatenation in the given tuples.", "code": "def concatenate_elements(test_tup):\r\n  res = tuple(i + j for i, j in zip(test_tup, test_tup[1:]))\r\n  return (res) ", "task_id": 206, "test_setup_code": "", "test_list": ["assert concatenate_elements((\"DSP \", \"IS \", \"BEST \", \"FOR \", \"ALL \", \"UTS\")) == ('DSP IS ', 'IS BEST ', 'BEST FOR ', 'FOR ALL ', 'ALL UTS')", "assert concatenate_elements((\"RES \", \"IS \", \"BEST \", \"FOR \", \"ALL \", \"QESR\")) == ('RES IS ', 'IS BEST ', 'BEST FOR ', 'FOR ALL ', 'ALL QESR')", "assert concatenate_elements((\"MSAM\", \"IS \", \"BEST \", \"FOR \", \"ALL \", \"SKD\")) == ('MSAMIS ', 'IS BEST ', 'BEST FOR ', 'FOR ALL ', 'ALL SKD')"], "challenge_test_list": []}
{"text": "Write a function to count the longest repeating subsequences such that the two subsequences don\u2019t have same string characters at same positions.", "code": "def find_longest_repeating_subseq(str): \r\n\tn = len(str) \r\n\tdp = [[0 for k in range(n+1)] for l in range(n+1)] \r\n\tfor i in range(1, n+1): \r\n\t\tfor j in range(1, n+1): \r\n\t\t\tif (str[i-1] == str[j-1] and i != j): \r\n\t\t\t\tdp[i][j] = 1 + dp[i-1][j-1] \r\n\t\t\telse: \r\n\t\t\t\tdp[i][j] = max(dp[i][j-1], dp[i-1][j]) \r\n\treturn dp[n][n]", "task_id": 207, "test_setup_code": "", "test_list": ["assert find_longest_repeating_subseq(\"AABEBCDD\") == 3", "assert find_longest_repeating_subseq(\"aabb\") == 2", "assert find_longest_repeating_subseq(\"aab\") == 1"], "challenge_test_list": []}
{"text": "Write a function to check the given decimal with a precision of 2 by using regex.", "code": "import re\r\ndef is_decimal(num):\r\n  num_fetch = re.compile(r\"\"\"^[0-9]+(\\.[0-9]{1,2})?$\"\"\")\r\n  result = num_fetch.search(num)\r\n  return bool(result)", "task_id": 208, "test_setup_code": "", "test_list": ["assert is_decimal('123.11') == True", "assert is_decimal('0.21') == True", "assert is_decimal('123.1214') == False"], "challenge_test_list": []}
{"text": "Write a function to delete the smallest element from the given heap and then insert a new item.", "code": "import heapq as hq\r\ndef heap_replace(heap,a):\r\n  hq.heapify(heap)\r\n  hq.heapreplace(heap, a)\r\n  return heap", "task_id": 209, "test_setup_code": "", "test_list": ["assert heap_replace( [25, 44, 68, 21, 39, 23, 89],21)==[21, 25, 23, 44, 39, 68, 89]", "assert heap_replace([25, 44, 68, 21, 39, 23, 89],110)== [23, 25, 68, 44, 39, 110, 89]", "assert heap_replace([25, 44, 68, 21, 39, 23, 89],500)==[23, 25, 68, 44, 39, 500, 89]"], "challenge_test_list": []}
{"text": "Write a function to check that the given string contains only a certain set of characters(in this case a-z, a-z and 0-9) by using regex.", "code": "import re\r\ndef is_allowed_specific_char(string):\r\n    get_char = re.compile(r'[^a-zA-Z0-9.]')\r\n    string = get_char.search(string)\r\n    return not bool(string)", "task_id": 210, "test_setup_code": "", "test_list": ["assert is_allowed_specific_char(\"ABCDEFabcdef123450\") == True", "assert is_allowed_specific_char(\"*&%@#!}{\") == False", "assert is_allowed_specific_char(\"HELLOhowareyou98765\") == True"], "challenge_test_list": []}
{"text": "Write a python function to count numbers whose oth and nth bits are set.", "code": "def count_Num(n): \r\n    if (n == 1): \r\n        return 1\r\n    count = pow(2,n - 2) \r\n    return count ", "task_id": 211, "test_setup_code": "", "test_list": ["assert count_Num(2) == 1", "assert count_Num(3) == 2", "assert count_Num(1) == 1"], "challenge_test_list": []}
{"text": "Write a python function to find the sum of fourth power of n natural numbers.", "code": "import math  \r\ndef fourth_Power_Sum(n): \r\n    sum = 0\r\n    for i in range(1,n+1) : \r\n        sum = sum + (i*i*i*i) \r\n    return sum", "task_id": 212, "test_setup_code": "", "test_list": ["assert fourth_Power_Sum(2) == 17", "assert fourth_Power_Sum(4) == 354", "assert fourth_Power_Sum(6) == 2275"], "challenge_test_list": []}
{"text": "Write a function to perform the concatenation of two string tuples.", "code": "def concatenate_strings(test_tup1, test_tup2):\r\n  res = tuple(ele1 + ele2 for ele1, ele2 in zip(test_tup1, test_tup2))\r\n  return (res) ", "task_id": 213, "test_setup_code": "", "test_list": ["assert concatenate_strings((\"Manjeet\", \"Nikhil\", \"Akshat\"), (\" Singh\", \" Meherwal\", \" Garg\")) == ('Manjeet Singh', 'Nikhil Meherwal', 'Akshat Garg')", "assert concatenate_strings((\"Shaik\", \"Ayesha\", \"Sanya\"), (\" Dawood\", \" Begum\", \" Singh\")) == ('Shaik Dawood', 'Ayesha Begum', 'Sanya Singh')", "assert concatenate_strings((\"Harpreet\", \"Priyanka\", \"Muskan\"), (\"Kour\", \" Agarwal\", \"Sethi\")) == ('HarpreetKour', 'Priyanka Agarwal', 'MuskanSethi')"], "challenge_test_list": []}
{"text": "Write a function to convert radians to degrees.", "code": "import math\r\ndef degree_radian(radian):\r\n degree = radian*(180/math.pi)\r\n return degree", "task_id": 214, "test_setup_code": "", "test_list": ["assert degree_radian(90)==5156.620156177409", "assert degree_radian(60)==3437.746770784939", "assert degree_radian(120)==6875.493541569878"], "challenge_test_list": []}
{"text": "Write a function to decode a run-length encoded given list.", "code": "def decode_list(alist):\r\n    def aux(g):\r\n        if isinstance(g, list):\r\n            return [(g[1], range(g[0]))]\r\n        else:\r\n            return [(g, [0])]\r\n    return [x for g in alist for x, R in aux(g) for i in R]", "task_id": 215, "test_setup_code": "", "test_list": ["assert decode_list([[2, 1], 2, 3, [2, 4], 5,1])==[1,1,2,3,4,4,5,1]", "assert decode_list(['a', 'u', 't', 'o', 'm', 'a', 't', 'i', 'c', 'a', [2, 'l'], 'y'])==['a', 'u', 't', 'o', 'm', 'a', 't', 'i', 'c', 'a', 'l', 'l', 'y']", "assert decode_list(['p', 'y', 't', 'h', 'o', 'n'])==['p', 'y', 't', 'h', 'o', 'n']"], "challenge_test_list": []}
{"text": "Write a function to check if a nested list is a subset of another nested list.", "code": "def check_subset_list(list1, list2): \r\n    l1, l2 = list1[0], list2[0] \r\n    exist = True\r\n    for i in list2: \r\n        if i not in list1: \r\n            exist = False\r\n    return exist ", "task_id": 216, "test_setup_code": "", "test_list": ["assert check_subset_list([1, 2, 3, 4, 5, 6, 7, 8, 9, 10, 11, 12, 13, 14],[[12, 18, 23, 25, 45], [7, 11, 19, 24, 28], [1, 5, 8, 18, 15, 16]])==False", "assert check_subset_list([[2, 3, 1], [4, 5], [6, 8]],[[4, 5], [6, 8]])==True", "assert check_subset_list([['a', 'b'], ['e'], ['c', 'd']],[['g']])==False"], "challenge_test_list": []}
{"text": "Write a python function to find the first repeated character in a given string.", "code": "def first_Repeated_Char(str): \r\n    h = {}\r\n    for ch in str:\r\n        if ch in h: \r\n            return ch;\r\n        else: \r\n            h[ch] = 0\r\n    return '\\0'", "task_id": 217, "test_setup_code": "", "test_list": ["assert first_Repeated_Char(\"Google\") == \"o\"", "assert first_Repeated_Char(\"data\") == \"a\"", "assert first_Repeated_Char(\"python\") == '\\0'"], "challenge_test_list": []}
{"text": "Write a python function to find the minimum operations required to make two numbers equal.", "code": "import math   \r\ndef min_Operations(A,B):  \r\n    if (A > B): \r\n        swap(A,B)  \r\n    B = B // math.gcd(A,B);  \r\n    return B - 1", "task_id": 218, "test_setup_code": "", "test_list": ["assert min_Operations(2,4) == 1", "assert min_Operations(4,10) == 4", "assert min_Operations(1,4) == 3"], "challenge_test_list": []}
{"text": "Write a function to extract maximum and minimum k elements in the given tuple.", "code": "\r\ndef extract_min_max(test_tup, K):\r\n  res = []\r\n  test_tup = list(test_tup)\r\n  temp = sorted(test_tup)\r\n  for idx, val in enumerate(temp):\r\n    if idx < K or idx >= len(temp) - K:\r\n      res.append(val)\r\n  res = tuple(res)\r\n  return (res) ", "task_id": 219, "test_setup_code": "", "test_list": ["assert extract_min_max((5, 20, 3, 7, 6, 8), 2) == (3, 5, 8, 20)", "assert extract_min_max((4, 5, 6, 1, 2, 7), 3) == (1, 2, 4, 5, 6, 7)", "assert extract_min_max((2, 3, 4, 8, 9, 11, 7), 4) == (2, 3, 4, 7, 8, 9, 11)"], "challenge_test_list": []}
{"text": "Write a function to replace maximum n occurrences of spaces, commas, or dots with a colon.", "code": "import re\r\ndef replace_max_specialchar(text,n):\r\n return (re.sub(\"[ ,.]\", \":\", text, n))", "task_id": 220, "test_setup_code": "", "test_list": ["assert replace_max_specialchar('Python language, Programming language.',2)==('Python:language: Programming language.')", "assert replace_max_specialchar('a b c,d e f',3)==('a:b:c:d e f')", "assert replace_max_specialchar('ram reshma,ram rahim',1)==('ram:reshma,ram rahim')"], "challenge_test_list": []}
{"text": "Write a python function to find the first even number in a given list of numbers.", "code": "def first_even(nums):\r\n    first_even = next((el for el in nums if el%2==0),-1)\r\n    return first_even", "task_id": 221, "test_setup_code": "", "test_list": ["assert first_even ([1, 3, 5, 7, 4, 1, 6, 8]) == 4", "assert first_even([2, 3, 4]) == 2", "assert first_even([5, 6, 7]) == 6"], "challenge_test_list": []}
{"text": "Write a function to check if all the elements in tuple have same data type or not.", "code": "def check_type(test_tuple):\r\n  res = True\r\n  for ele in test_tuple:\r\n    if not isinstance(ele, type(test_tuple[0])):\r\n      res = False\r\n      break\r\n  return (res) ", "task_id": 222, "test_setup_code": "", "test_list": ["assert check_type((5, 6, 7, 3, 5, 6) ) == True", "assert check_type((1, 2, \"4\") ) == False", "assert check_type((3, 2, 1, 4, 5) ) == True"], "challenge_test_list": []}
{"text": "Write a function to check for majority element in the given sorted array.", "code": "def is_majority(arr, n, x):\r\n\ti = binary_search(arr, 0, n-1, x)\r\n\tif i == -1:\r\n\t\treturn False\r\n\tif ((i + n//2) <= (n -1)) and arr[i + n//2] == x:\r\n\t\treturn True\r\n\telse:\r\n\t\treturn False\r\ndef binary_search(arr, low, high, x):\r\n\tif high >= low:\r\n\t\tmid = (low + high)//2 \r\n\t\tif (mid == 0 or x > arr[mid-1]) and (arr[mid] == x):\r\n\t\t\treturn mid\r\n\t\telif x > arr[mid]:\r\n\t\t\treturn binary_search(arr, (mid + 1), high, x)\r\n\t\telse:\r\n\t\t\treturn binary_search(arr, low, (mid -1), x)\r\n\treturn -1", "task_id": 223, "test_setup_code": "", "test_list": ["assert is_majority([1, 2, 3, 3, 3, 3, 10], 7, 3) == True", "assert is_majority([1, 1, 2, 4, 4, 4, 6, 6], 8, 4) == False", "assert is_majority([1, 1, 1, 2, 2], 5, 1) == True"], "challenge_test_list": []}
{"text": "Write a python function to count set bits of a given number.", "code": "def count_Set_Bits(n): \r\n    count = 0\r\n    while (n): \r\n        count += n & 1\r\n        n >>= 1\r\n    return count ", "task_id": 224, "test_setup_code": "", "test_list": ["assert count_Set_Bits(2) == 1", "assert count_Set_Bits(4) == 1", "assert count_Set_Bits(6) == 2"], "challenge_test_list": []}
{"text": "Write a python function to find the minimum element in a sorted and rotated array.", "code": "def find_Min(arr,low,high): \r\n    while (low < high): \r\n        mid = low + (high - low) // 2;   \r\n        if (arr[mid] == arr[high]): \r\n            high -= 1; \r\n        elif (arr[mid] > arr[high]): \r\n            low = mid + 1; \r\n        else: \r\n            high = mid; \r\n    return arr[high]; ", "task_id": 225, "test_setup_code": "", "test_list": ["assert find_Min([1,2,3,4,5],0,4) == 1", "assert find_Min([4,6,8],0,2) == 4", "assert find_Min([2,3,5,7,9],0,4) == 2"], "challenge_test_list": []}
{"text": "Write a python function to remove the characters which have odd index values of a given string.", "code": "def odd_values_string(str):\r\n  result = \"\" \r\n  for i in range(len(str)):\r\n    if i % 2 == 0:\r\n      result = result + str[i]\r\n  return result", "task_id": 226, "test_setup_code": "", "test_list": ["assert odd_values_string('abcdef') == 'ace'", "assert odd_values_string('python') == 'pto'", "assert odd_values_string('data') == 'dt'"], "challenge_test_list": []}
{"text": "Write a function to find minimum of three numbers.", "code": "def min_of_three(a,b,c): \r\n      if (a <= b) and (a <= c): \r\n        smallest = a \r\n      elif (b <= a) and (b <= c): \r\n        smallest = b \r\n      else: \r\n        smallest = c \r\n      return smallest ", "task_id": 227, "test_setup_code": "", "test_list": ["assert min_of_three(10,20,0)==0", "assert min_of_three(19,15,18)==15", "assert min_of_three(-10,-20,-30)==-30"], "challenge_test_list": []}
{"text": "Write a python function to check whether all the bits are unset in the given range or not.", "code": "def all_Bits_Set_In_The_Given_Range(n,l,r):  \r\n    num = (((1 << r) - 1) ^ ((1 << (l - 1)) - 1)) \r\n    new_num = n & num\r\n    if (new_num == 0): \r\n        return True\r\n    return False", "task_id": 228, "test_setup_code": "", "test_list": ["assert all_Bits_Set_In_The_Given_Range(4,1,2) == True", "assert all_Bits_Set_In_The_Given_Range(17,2,4) == True", "assert all_Bits_Set_In_The_Given_Range(39,4,6) == False"], "challenge_test_list": []}
{"text": "Write a function to re-arrange the elements of the given array so that all negative elements appear before positive ones.", "code": "def re_arrange_array(arr, n):\r\n  j=0\r\n  for i in range(0, n):\r\n    if (arr[i] < 0):\r\n      temp = arr[i]\r\n      arr[i] = arr[j]\r\n      arr[j] = temp\r\n      j = j + 1\r\n  return arr", "task_id": 229, "test_setup_code": "", "test_list": ["assert re_arrange_array([-1, 2, -3, 4, 5, 6, -7, 8, 9], 9) == [-1, -3, -7, 4, 5, 6, 2, 8, 9]", "assert re_arrange_array([12, -14, -26, 13, 15], 5) == [-14, -26, 12, 13, 15]", "assert re_arrange_array([10, 24, 36, -42, -39, -78, 85], 7) == [-42, -39, -78, 10, 24, 36, 85]"], "challenge_test_list": []}
{"text": "Write a function to replace blank spaces with any character in a string.", "code": "def replace_blank(str1,char):\r\n str2 = str1.replace(' ', char)\r\n return str2", "task_id": 230, "test_setup_code": "", "test_list": ["assert replace_blank(\"hello people\",'@')==(\"hello@people\")", "assert replace_blank(\"python program language\",'$')==(\"python$program$language\")", "assert replace_blank(\"blank space\",\"-\")==(\"blank-space\")"], "challenge_test_list": []}
{"text": "Write a function to find the maximum sum in the given right triangle of numbers.", "code": "def max_sum(tri, n): \r\n\tif n > 1: \r\n\t\ttri[1][1] = tri[1][1]+tri[0][0] \r\n\t\ttri[1][0] = tri[1][0]+tri[0][0] \r\n\tfor i in range(2, n): \r\n\t\ttri[i][0] = tri[i][0] + tri[i-1][0] \r\n\t\ttri[i][i] = tri[i][i] + tri[i-1][i-1] \r\n\t\tfor j in range(1, i): \r\n\t\t\tif tri[i][j]+tri[i-1][j-1] >= tri[i][j]+tri[i-1][j]: \r\n\t\t\t\ttri[i][j] = tri[i][j] + tri[i-1][j-1] \r\n\t\t\telse: \r\n\t\t\t\ttri[i][j] = tri[i][j]+tri[i-1][j] \r\n\treturn (max(tri[n-1]))", "task_id": 231, "test_setup_code": "", "test_list": ["assert max_sum([[1], [2,1], [3,3,2]], 3) == 6", "assert max_sum([[1], [1, 2], [4, 1, 12]], 3) == 15 ", "assert max_sum([[2], [3,2], [13,23,12]], 3) == 28"], "challenge_test_list": []}
{"text": "Write a function to get the n largest items from a dataset.", "code": "import heapq\r\ndef larg_nnum(list1,n):\r\n largest=heapq.nlargest(n,list1)\r\n return largest", "task_id": 232, "test_setup_code": "", "test_list": ["assert larg_nnum([10, 20, 50, 70, 90, 20, 50, 40, 60, 80, 100],2)==[100,90]", "assert larg_nnum([10, 20, 50, 70, 90, 20, 50, 40, 60, 80, 100],5)==[100,90,80,70,60]", "assert larg_nnum([10, 20, 50, 70, 90, 20, 50, 40, 60, 80, 100],3)==[100,90,80]"], "challenge_test_list": []}
{"text": "Write a function to find the lateral surface area of a cylinder.", "code": "def lateralsuface_cylinder(r,h):\r\n  lateralsurface= 2*3.1415*r*h\r\n  return lateralsurface", "task_id": 233, "test_setup_code": "", "test_list": ["assert lateralsuface_cylinder(10,5)==314.15000000000003", "assert lateralsuface_cylinder(4,5)==125.66000000000001", "assert lateralsuface_cylinder(4,10)==251.32000000000002"], "challenge_test_list": []}
{"text": "Write a function to find the volume of a cube.", "code": "def volume_cube(l):\r\n  volume = l * l * l\r\n  return volume", "task_id": 234, "test_setup_code": "", "test_list": ["assert volume_cube(3)==27", "assert volume_cube(2)==8", "assert volume_cube(5)==125"], "challenge_test_list": []}
{"text": "Write a python function to set all even bits of a given number.", "code": "def even_bit_set_number(n): \r\n    count = 0;res = 0;temp = n \r\n    while(temp > 0): \r\n        if (count % 2 == 1): \r\n            res |= (1 << count)\r\n        count+=1\r\n        temp >>= 1\r\n    return (n | res) ", "task_id": 235, "test_setup_code": "", "test_list": ["assert even_bit_set_number(10) == 10", "assert even_bit_set_number(20) == 30", "assert even_bit_set_number(30) == 30"], "challenge_test_list": []}
{"text": "Write a python function to count the maximum number of equilateral triangles that can be formed within a given equilateral triangle.", "code": "def No_of_Triangle(N,K):\r\n    if (N < K):\r\n        return -1;\r\n    else:\r\n        Tri_up = 0;\r\n        Tri_up = ((N - K + 1) *(N - K + 2)) // 2;\r\n        Tri_down = 0;\r\n        Tri_down = ((N - 2 * K + 1) *(N - 2 * K + 2)) // 2;\r\n        return Tri_up + Tri_down;", "task_id": 236, "test_setup_code": "", "test_list": ["assert No_of_Triangle(4,2) == 7", "assert No_of_Triangle(4,3) == 3", "assert No_of_Triangle(1,3) == -1"], "challenge_test_list": []}
{"text": "Write a function to check the occurrences of records which occur similar times in the given tuples.", "code": "from collections import Counter \r\ndef check_occurences(test_list):\r\n  res = dict(Counter(tuple(ele) for ele in map(sorted, test_list)))\r\n  return  (res) ", "task_id": 237, "test_setup_code": "", "test_list": ["assert check_occurences([(3, 1), (1, 3), (2, 5), (5, 2), (6, 3)] ) == {(1, 3): 2, (2, 5): 2, (3, 6): 1}", "assert check_occurences([(4, 2), (2, 4), (3, 6), (6, 3), (7, 4)] ) == {(2, 4): 2, (3, 6): 2, (4, 7): 1}", "assert check_occurences([(13, 2), (11, 23), (12, 25), (25, 12), (16, 23)] ) == {(2, 13): 1, (11, 23): 1, (12, 25): 2, (16, 23): 1}"], "challenge_test_list": []}
{"text": "Write a python function to count number of non-empty substrings of a given string.", "code": "def number_of_substrings(str): \r\n\tstr_len = len(str); \r\n\treturn int(str_len * (str_len + 1) / 2); ", "task_id": 238, "test_setup_code": "", "test_list": ["assert number_of_substrings(\"abc\") == 6", "assert number_of_substrings(\"abcd\") == 10", "assert number_of_substrings(\"abcde\") == 15"], "challenge_test_list": []}
{"text": "Write a function to find the number of possible sequences of length n such that each of the next element is greater than or equal to twice of the previous element but less than or equal to m.", "code": "def get_total_number_of_sequences(m,n): \r\n\tT=[[0 for i in range(n+1)] for i in range(m+1)] \r\n\tfor i in range(m+1): \r\n\t\tfor j in range(n+1): \r\n\t\t\tif i==0 or j==0: \r\n\t\t\t\tT[i][j]=0\r\n\t\t\telif i<j: \r\n\t\t\t\tT[i][j]=0\r\n\t\t\telif j==1: \r\n\t\t\t\tT[i][j]=i \r\n\t\t\telse: \r\n\t\t\t\tT[i][j]=T[i-1][j]+T[i//2][j-1] \r\n\treturn T[m][n]", "task_id": 239, "test_setup_code": "", "test_list": ["assert get_total_number_of_sequences(10, 4) == 4", "assert get_total_number_of_sequences(5, 2) == 6", "assert get_total_number_of_sequences(16, 3) == 84"], "challenge_test_list": []}
{"text": "Write a function to replace the last element of the list with another list.", "code": "def replace_list(list1,list2):\r\n list1[-1:] = list2\r\n replace_list=list1\r\n return replace_list\r\n", "task_id": 240, "test_setup_code": "", "test_list": ["assert replace_list([1, 3, 5, 7, 9, 10],[2, 4, 6, 8])==[1, 3, 5, 7, 9, 2, 4, 6, 8]", "assert replace_list([1,2,3,4,5],[5,6,7,8])==[1,2,3,4,5,6,7,8]", "assert replace_list([\"red\",\"blue\",\"green\"],[\"yellow\"])==[\"red\",\"blue\",\"yellow\"]"], "challenge_test_list": []}
{"text": "Write a function to generate a 3d array having each element as '*'.", "code": "def array_3d(m,n,o):\r\n array_3d = [[ ['*' for col in range(m)] for col in range(n)] for row in range(o)]\r\n return array_3d", "task_id": 241, "test_setup_code": "", "test_list": ["assert array_3d(6,4,3)==[[['*', '*', '*', '*', '*', '*'], ['*', '*', '*', '*', '*', '*'], ['*', '*', '*', '*', '*', '*'], ['*', '*', '*', '*', '*', '*']], [['*', '*', '*', '*', '*', '*'], ['*', '*', '*', '*', '*', '*'], ['*', '*', '*', '*', '*', '*'], ['*', '*', '*', '*', '*', '*']], [['*', '*', '*', '*', '*', '*'], ['*', '*', '*', '*', '*', '*'], ['*', '*', '*', '*', '*', '*'], ['*', '*', '*', '*', '*', '*']]]", "assert array_3d(5,3,4)==[[['*', '*', '*', '*', '*'], ['*', '*', '*', '*','*'], ['*', '*', '*', '*', '*']], [['*', '*', '*', '*', '*'],['*', '*', '*', '*', '*'], ['*', '*', '*', '*', '*']], [['*', '*', '*', '*', '*'], ['*', '*', '*', '*', '*'], ['*', '*', '*', '*', '*']], [['*', '*', '*', '*', '*'], ['*', '*', '*', '*', '*'], ['*', '*', '*', '*', '*']]]", "assert array_3d(1,2,3)==[[['*'],['*']],[['*'],['*']],[['*'],['*']]]"], "challenge_test_list": []}
{"text": "Write a function to count total characters in a string.", "code": "def count_charac(str1):\r\n total = 0\r\n for i in str1:\r\n    total = total + 1\r\n return total", "task_id": 242, "test_setup_code": "", "test_list": ["assert count_charac(\"python programming\")==18", "assert count_charac(\"language\")==8", "assert count_charac(\"words\")==5"], "challenge_test_list": []}
{"text": "Write a function to sort the given list based on the occurrence of first element of tuples.", "code": "def sort_on_occurence(lst): \r\n\tdct = {} \r\n\tfor i, j in lst: \r\n\t\tdct.setdefault(i, []).append(j) \r\n\treturn ([(i, *dict.fromkeys(j), len(j)) \r\n\t\t\t\tfor i, j in dct.items()]) ", "task_id": 243, "test_setup_code": "", "test_list": ["assert sort_on_occurence([(1, 'Jake'), (2, 'Bob'), (1, 'Cara')]) == [(1, 'Jake', 'Cara', 2), (2, 'Bob', 1)]", "assert sort_on_occurence([('b', 'ball'), ('a', 'arm'), ('b', 'b'), ('a', 'ant')]) == [('b', 'ball', 'b', 2), ('a', 'arm', 'ant', 2)]", "assert sort_on_occurence([(2, 'Mark'), (3, 'Maze'), (2, 'Sara')]) == [(2, 'Mark', 'Sara', 2), (3, 'Maze', 1)]"], "challenge_test_list": []}
{"text": "Write a python function to find the next perfect square greater than a given number.", "code": "import math  \r\ndef next_Perfect_Square(N): \r\n    nextN = math.floor(math.sqrt(N)) + 1\r\n    return nextN * nextN ", "task_id": 244, "test_setup_code": "", "test_list": ["assert next_Perfect_Square(35) == 36", "assert next_Perfect_Square(6) == 9", "assert next_Perfect_Square(9) == 16"], "challenge_test_list": []}
{"text": "Write a function to find the maximum sum of bi-tonic sub-sequence for the given array.", "code": "def max_sum(arr, n): \r\n\tMSIBS = arr[:] \r\n\tfor i in range(n): \r\n\t\tfor j in range(0, i): \r\n\t\t\tif arr[i] > arr[j] and MSIBS[i] < MSIBS[j] + arr[i]: \r\n\t\t\t\tMSIBS[i] = MSIBS[j] + arr[i] \r\n\tMSDBS = arr[:] \r\n\tfor i in range(1, n + 1): \r\n\t\tfor j in range(1, i): \r\n\t\t\tif arr[-i] > arr[-j] and MSDBS[-i] < MSDBS[-j] + arr[-i]: \r\n\t\t\t\tMSDBS[-i] = MSDBS[-j] + arr[-i] \r\n\tmax_sum = float(\"-Inf\") \r\n\tfor i, j, k in zip(MSIBS, MSDBS, arr): \r\n\t\tmax_sum = max(max_sum, i + j - k) \r\n\treturn max_sum", "task_id": 245, "test_setup_code": "", "test_list": ["assert max_sum([1, 15, 51, 45, 33, 100, 12, 18, 9], 9) == 194", "assert max_sum([80, 60, 30, 40, 20, 10], 6) == 210", "assert max_sum([2, 3 ,14, 16, 21, 23, 29, 30], 8) == 138"], "challenge_test_list": []}
{"text": "Write a function for computing square roots using the babylonian method.", "code": "def babylonian_squareroot(number):\r\n    if(number == 0):\r\n        return 0;\r\n    g = number/2.0;\r\n    g2 = g + 1;\r\n    while(g != g2):\r\n        n = number/ g;\r\n        g2 = g;\r\n        g = (g + n)/2;\r\n    return g;", "task_id": 246, "test_setup_code": "", "test_list": ["assert babylonian_squareroot(10)==3.162277660168379", "assert babylonian_squareroot(2)==1.414213562373095", "assert babylonian_squareroot(9)==3.0"], "challenge_test_list": []}
{"text": "Write a function to find the longest palindromic subsequence in the given string.", "code": "def lps(str): \r\n\tn = len(str) \r\n\tL = [[0 for x in range(n)] for x in range(n)] \r\n\tfor i in range(n): \r\n\t\tL[i][i] = 1\r\n\tfor cl in range(2, n+1): \r\n\t\tfor i in range(n-cl+1): \r\n\t\t\tj = i+cl-1\r\n\t\t\tif str[i] == str[j] and cl == 2: \r\n\t\t\t\tL[i][j] = 2\r\n\t\t\telif str[i] == str[j]: \r\n\t\t\t\tL[i][j] = L[i+1][j-1] + 2\r\n\t\t\telse: \r\n\t\t\t\tL[i][j] = max(L[i][j-1], L[i+1][j]); \r\n\treturn L[0][n-1]", "task_id": 247, "test_setup_code": "", "test_list": ["assert lps(\"TENS FOR TENS\") == 5 ", "assert lps(\"CARDIO FOR CARDS\") == 7", "assert lps(\"PART OF THE JOURNEY IS PART\") == 9 "], "challenge_test_list": []}
{"text": "Write a function to calculate the harmonic sum of n-1.", "code": "def harmonic_sum(n):\r\n  if n < 2:\r\n    return 1\r\n  else:\r\n    return 1 / n + (harmonic_sum(n - 1)) ", "task_id": 248, "test_setup_code": "", "test_list": ["assert harmonic_sum(7) == 2.5928571428571425", "assert harmonic_sum(4) == 2.083333333333333", "assert harmonic_sum(19) == 3.547739657143682"], "challenge_test_list": []}
{"text": "Write a function to find the intersection of two arrays using lambda function.", "code": "def intersection_array(array_nums1,array_nums2):\r\n result = list(filter(lambda x: x in array_nums1, array_nums2)) \r\n return result", "task_id": 249, "test_setup_code": "", "test_list": ["assert intersection_array([1, 2, 3, 5, 7, 8, 9, 10],[1, 2, 4, 8, 9])==[1, 2, 8, 9]", "assert intersection_array([1, 2, 3, 5, 7, 8, 9, 10],[3,5,7,9])==[3,5,7,9]", "assert intersection_array([1, 2, 3, 5, 7, 8, 9, 10],[10,20,30,40])==[10]"], "challenge_test_list": []}
{"text": "Write a python function to count the occcurences of an element in a tuple.", "code": "def count_X(tup, x): \r\n    count = 0\r\n    for ele in tup: \r\n        if (ele == x): \r\n            count = count + 1\r\n    return count ", "task_id": 250, "test_setup_code": "", "test_list": ["assert count_X((10, 8, 5, 2, 10, 15, 10, 8, 5, 8, 8, 2),4) == 0", "assert count_X((10, 8, 5, 2, 10, 15, 10, 8, 5, 8, 8, 2),10) == 3", "assert count_X((10, 8, 5, 2, 10, 15, 10, 8, 5, 8, 8, 2),8) == 4"], "challenge_test_list": []}
{"text": "Write a function to insert an element before each element of a list.", "code": "def insert_element(list,element):\r\n list = [v for elt in list for v in (element, elt)]\r\n return list", "task_id": 251, "test_setup_code": "", "test_list": ["assert insert_element(['Red', 'Green', 'Black'] ,'c')==['c', 'Red', 'c', 'Green', 'c', 'Black'] ", "assert insert_element(['python', 'java'] ,'program')==['program', 'python', 'program', 'java'] ", "assert insert_element(['happy', 'sad'] ,'laugh')==['laugh', 'happy', 'laugh', 'sad'] "], "challenge_test_list": []}
{"text": "Write a python function to convert complex numbers to polar coordinates.", "code": "import cmath  \r\ndef convert(numbers):    \r\n  num = cmath.polar(numbers)  \r\n  return (num) ", "task_id": 252, "test_setup_code": "", "test_list": ["assert convert(1) == (1.0, 0.0)", "assert convert(4) == (4.0,0.0)", "assert convert(5) == (5.0,0.0)"], "challenge_test_list": []}
{"text": "Write a python function to count integers from a given list.", "code": "def count_integer(list1):\r\n    ctr = 0\r\n    for i in list1:\r\n        if isinstance(i, int):\r\n            ctr = ctr + 1\r\n    return ctr", "task_id": 253, "test_setup_code": "", "test_list": ["assert count_integer([1,2,'abc',1.2]) == 2", "assert count_integer([1,2,3]) == 3", "assert count_integer([1,1.2,4,5.1]) == 2"], "challenge_test_list": []}
{"text": "Write a function to find all words starting with 'a' or 'e' in a given string.", "code": "import re\r\ndef words_ae(text):\r\n list = re.findall(\"[ae]\\w+\", text)\r\n return list", "task_id": 254, "test_setup_code": "", "test_list": ["assert words_ae(\"python programe\")==['ame']", "assert words_ae(\"python programe language\")==['ame','anguage']", "assert words_ae(\"assert statement\")==['assert', 'atement']"], "challenge_test_list": []}
{"text": "Write a function to choose specified number of colours from three different colours and generate all the combinations with repetitions.", "code": "from itertools import combinations_with_replacement \r\ndef combinations_colors(l, n):\r\n    return list(combinations_with_replacement(l,n))\r", "task_id": 255, "test_setup_code": "", "test_list": ["assert combinations_colors( [\"Red\",\"Green\",\"Blue\"],1)==[('Red',), ('Green',), ('Blue',)]", "assert combinations_colors( [\"Red\",\"Green\",\"Blue\"],2)==[('Red', 'Red'), ('Red', 'Green'), ('Red', 'Blue'), ('Green', 'Green'), ('Green', 'Blue'), ('Blue', 'Blue')]", "assert combinations_colors( [\"Red\",\"Green\",\"Blue\"],3)==[('Red', 'Red', 'Red'), ('Red', 'Red', 'Green'), ('Red', 'Red', 'Blue'), ('Red', 'Green', 'Green'), ('Red', 'Green', 'Blue'), ('Red', 'Blue', 'Blue'), ('Green', 'Green', 'Green'), ('Green', 'Green', 'Blue'), ('Green', 'Blue', 'Blue'), ('Blue', 'Blue', 'Blue')]"], "challenge_test_list": []}
{"text": "Write a python function to count the number of prime numbers less than a given non-negative number.", "code": "def count_Primes_nums(n):\r\n    ctr = 0\r\n    for num in range(n):\r\n        if num <= 1:\r\n            continue\r\n        for i in range(2,num):\r\n            if (num % i) == 0:\r\n                break\r\n        else:\r\n            ctr += 1\r\n    return ctr", "task_id": 256, "test_setup_code": "", "test_list": ["assert count_Primes_nums(5) == 2", "assert count_Primes_nums(10) == 4", "assert count_Primes_nums(100) == 25"], "challenge_test_list": []}
{"text": "Write a function to swap two numbers.", "code": "def swap_numbers(a,b):\r\n temp = a\r\n a = b\r\n b = temp\r\n return (a,b)", "task_id": 257, "test_setup_code": "", "test_list": ["assert swap_numbers(10,20)==(20,10)", "assert swap_numbers(15,17)==(17,15)", "assert swap_numbers(100,200)==(200,100)"], "challenge_test_list": []}
{"text": "Write a function to find number of odd elements in the given list using lambda function.", "code": "def count_odd(array_nums):\r\n   count_odd = len(list(filter(lambda x: (x%2 != 0) , array_nums)))\r\n   return count_odd", "task_id": 258, "test_setup_code": "", "test_list": ["assert count_odd([1, 2, 3, 5, 7, 8, 10])==4", "assert count_odd([10,15,14,13,-18,12,-20])==2", "assert count_odd([1, 2, 4, 8, 9])==2"], "challenge_test_list": []}
{"text": "Write a function to maximize the given two tuples.", "code": "def maximize_elements(test_tup1, test_tup2):\r\n  res = tuple(tuple(max(a, b) for a, b in zip(tup1, tup2))\r\n   for tup1, tup2 in zip(test_tup1, test_tup2))\r\n  return (res) ", "task_id": 259, "test_setup_code": "", "test_list": ["assert maximize_elements(((1, 3), (4, 5), (2, 9), (1, 10)), ((6, 7), (3, 9), (1, 1), (7, 3))) == ((6, 7), (4, 9), (2, 9), (7, 10))", "assert maximize_elements(((2, 4), (5, 6), (3, 10), (2, 11)), ((7, 8), (4, 10), (2, 2), (8, 4))) == ((7, 8), (5, 10), (3, 10), (8, 11))", "assert maximize_elements(((3, 5), (6, 7), (4, 11), (3, 12)), ((8, 9), (5, 11), (3, 3), (9, 5))) == ((8, 9), (6, 11), (4, 11), (9, 12))"], "challenge_test_list": []}
{"text": "Write a function to find the nth newman\u2013shanks\u2013williams prime number.", "code": "def newman_prime(n): \r\n\tif n == 0 or n == 1: \r\n\t\treturn 1\r\n\treturn 2 * newman_prime(n - 1) + newman_prime(n - 2)", "task_id": 260, "test_setup_code": "", "test_list": ["assert newman_prime(3) == 7 ", "assert newman_prime(4) == 17", "assert newman_prime(5) == 41"], "challenge_test_list": []}
{"text": "Write a function to perform mathematical division operation across the given tuples.", "code": "def division_elements(test_tup1, test_tup2):\r\n  res = tuple(ele1 // ele2 for ele1, ele2 in zip(test_tup1, test_tup2))\r\n  return (res) ", "task_id": 261, "test_setup_code": "", "test_list": ["assert division_elements((10, 4, 6, 9),(5, 2, 3, 3)) == (2, 2, 2, 3)", "assert division_elements((12, 6, 8, 16),(6, 3, 4, 4)) == (2, 2, 2, 4)", "assert division_elements((20, 14, 36, 18),(5, 7, 6, 9)) == (4, 2, 6, 2)"], "challenge_test_list": []}
{"text": "Write a function to split a given list into two parts where the length of the first part of the list is given.", "code": "def split_two_parts(list1, L):\r\n    return list1[:L], list1[L:]", "task_id": 262, "test_setup_code": "", "test_list": ["assert split_two_parts([1,1,2,3,4,4,5,1],3)==([1, 1, 2], [3, 4, 4, 5, 1])", "assert split_two_parts(['a', 'b', 'c', 'd'],2)==(['a', 'b'], ['c', 'd'])", "assert split_two_parts(['p', 'y', 't', 'h', 'o', 'n'],4)==(['p', 'y', 't', 'h'], ['o', 'n'])"], "challenge_test_list": []}
{"text": "Write a function to merge two dictionaries.", "code": "def merge_dict(d1,d2):\r\n d = d1.copy()\r\n d.update(d2)\r\n return d", "task_id": 263, "test_setup_code": "", "test_list": ["assert merge_dict({'a': 100, 'b': 200},{'x': 300, 'y': 200})=={'x': 300, 'y': 200, 'a': 100, 'b': 200}", "assert merge_dict({'a':900,'b':900,'d':900},{'a':900,'b':900,'d':900})=={'a':900,'b':900,'d':900,'a':900,'b':900,'d':900}", "assert merge_dict({'a':10,'b':20},{'x':30,'y':40})=={'x':30,'y':40,'a':10,'b':20}"], "challenge_test_list": []}
{"text": "Write a function to calculate a dog's age in dog's years.", "code": "def dog_age(h_age):\r\n if h_age < 0:\r\n \texit()\r\n elif h_age <= 2:\r\n\t d_age = h_age * 10.5\r\n else:\r\n\t d_age = 21 + (h_age - 2)*4\r\n return d_age", "task_id": 264, "test_setup_code": "", "test_list": ["assert dog_age(12)==61", "assert dog_age(15)==73", "assert dog_age(24)==109"], "challenge_test_list": []}
{"text": "Write a function to split a list for every nth element.", "code": "def list_split(S, step):\r\n    return [S[i::step] for i in range(step)]", "task_id": 265, "test_setup_code": "", "test_list": ["assert list_split(['a', 'b', 'c', 'd', 'e', 'f', 'g', 'h', 'i', 'j', 'k', 'l', 'm', 'n'],3)==[['a', 'd', 'g', 'j', 'm'], ['b', 'e', 'h', 'k', 'n'], ['c', 'f', 'i', 'l']] ", "assert list_split([1,2,3,4,5,6,7,8,9,10,11,12,13,14],3)==[[1,4,7,10,13], [2,5,8,11,14], [3,6,9,12]] ", "assert list_split(['python','java','C','C++','DBMS','SQL'],2)==[['python', 'C', 'DBMS'], ['java', 'C++', 'SQL']] "], "challenge_test_list": []}
{"text": "Write a function to find the lateral surface area of a cube.", "code": "def lateralsurface_cube(l):\r\n  LSA = 4 * (l * l)\r\n  return LSA", "task_id": 266, "test_setup_code": "", "test_list": ["assert lateralsurface_cube(5)==100", "assert lateralsurface_cube(9)==324", "assert lateralsurface_cube(10)==400"], "challenge_test_list": []}
{"text": "Write a python function to find the sum of squares of first n odd natural numbers.", "code": "def square_Sum(n):  \r\n    return int(n*(4*n*n-1)/3) ", "task_id": 267, "test_setup_code": "", "test_list": ["assert square_Sum(2) == 10", "assert square_Sum(3) == 35", "assert square_Sum(4) == 84"], "challenge_test_list": []}
{"text": "Write a function to find the n'th star number.", "code": "def find_star_num(n): \r\n\treturn (6 * n * (n - 1) + 1) ", "task_id": 268, "test_setup_code": "", "test_list": ["assert find_star_num(3) == 37", "assert find_star_num(4) == 73", "assert find_star_num(5) == 121"], "challenge_test_list": []}
{"text": "Write a function to find the ascii value of a character.", "code": "def ascii_value(k):\r\n  ch=k\r\n  return ord(ch)", "task_id": 269, "test_setup_code": "", "test_list": ["assert ascii_value('A')==65", "assert ascii_value('R')==82", "assert ascii_value('S')==83"], "challenge_test_list": []}
{"text": "Write a python function to find the sum of even numbers at even positions.", "code": "def sum_even_and_even_index(arr,n):  \r\n    i = 0\r\n    sum = 0\r\n    for i in range(0,n,2): \r\n        if (arr[i] % 2 == 0) : \r\n            sum += arr[i]  \r\n    return sum", "task_id": 270, "test_setup_code": "", "test_list": ["assert sum_even_and_even_index([5, 6, 12, 1, 18, 8],6) == 30", "assert sum_even_and_even_index([3, 20, 17, 9, 2, 10, 18, 13, 6, 18],10) == 26", "assert sum_even_and_even_index([5, 6, 12, 1],4) == 12"], "challenge_test_list": []}
{"text": "Write a python function to find the sum of fifth power of first n even natural numbers.", "code": "def even_Power_Sum(n): \r\n    sum = 0; \r\n    for i in range(1,n+1): \r\n        j = 2*i; \r\n        sum = sum + (j*j*j*j*j); \r\n    return sum; ", "task_id": 271, "test_setup_code": "", "test_list": ["assert even_Power_Sum(2) == 1056", "assert even_Power_Sum(3) == 8832", "assert even_Power_Sum(1) == 32"], "challenge_test_list": []}
{"text": "Write a function to perfom the rear element extraction from list of tuples records.", "code": "def rear_extract(test_list):\r\n  res = [lis[-1] for lis in test_list]\r\n  return (res) ", "task_id": 272, "test_setup_code": "", "test_list": ["assert rear_extract([(1, 'Rash', 21), (2, 'Varsha', 20), (3, 'Kil', 19)]) == [21, 20, 19]", "assert rear_extract([(1, 'Sai', 36), (2, 'Ayesha', 25), (3, 'Salman', 45)]) == [36, 25, 45]", "assert rear_extract([(1, 'Sudeep', 14), (2, 'Vandana', 36), (3, 'Dawood', 56)]) == [14, 36, 56]"], "challenge_test_list": []}
{"text": "Write a function to substract the contents of one tuple with corresponding index of other tuple.", "code": "def substract_elements(test_tup1, test_tup2):\r\n  res = tuple(map(lambda i, j: i - j, test_tup1, test_tup2))\r\n  return (res) ", "task_id": 273, "test_setup_code": "", "test_list": ["assert substract_elements((10, 4, 5), (2, 5, 18)) == (8, -1, -13)", "assert substract_elements((11, 2, 3), (24, 45 ,16)) == (-13, -43, -13)", "assert substract_elements((7, 18, 9), (10, 11, 12)) == (-3, 7, -3)"], "challenge_test_list": []}
{"text": "Write a python function to find sum of even index binomial coefficients.", "code": "import math  \r\ndef even_binomial_Coeff_Sum( n): \r\n    return (1 << (n - 1)) ", "task_id": 274, "test_setup_code": "", "test_list": ["assert even_binomial_Coeff_Sum(4) == 8", "assert even_binomial_Coeff_Sum(6) == 32", "assert even_binomial_Coeff_Sum(2) == 2"], "challenge_test_list": []}
{"text": "Write a python function to find the position of the last removed element from the given array.", "code": "import math as mt \r\ndef get_Position(a,n,m): \r\n    for i in range(n): \r\n        a[i] = (a[i] // m + (a[i] % m != 0))  \r\n    result,maxx = -1,-1\r\n    for i in range(n - 1,-1,-1): \r\n        if (maxx < a[i]): \r\n            maxx = a[i] \r\n            result = i \r\n    return result + 1", "task_id": 275, "test_setup_code": "", "test_list": ["assert get_Position([2,5,4],3,2) == 2", "assert get_Position([4,3],2,2) == 2", "assert get_Position([1,2,3,4],4,1) == 4"], "challenge_test_list": []}
{"text": "Write a function to find the volume of a cylinder.", "code": "def volume_cylinder(r,h):\r\n  volume=3.1415*r*r*h\r\n  return volume", "task_id": 276, "test_setup_code": "", "test_list": ["assert volume_cylinder(10,5)==1570.7500000000002", "assert volume_cylinder(4,5)==251.32000000000002", "assert volume_cylinder(4,10)==502.64000000000004"], "challenge_test_list": []}
{"text": "Write a function to filter a dictionary based on values.", "code": "def dict_filter(dict,n):\r\n result = {key:value for (key, value) in dict.items() if value >=n}\r\n return result", "task_id": 277, "test_setup_code": "", "test_list": ["assert dict_filter({'Cierra Vega': 175, 'Alden Cantrell': 180, 'Kierra Gentry': 165, 'Pierre Cox': 190},170)=={'Cierra Vega': 175, 'Alden Cantrell': 180, 'Pierre Cox': 190}", "assert dict_filter({'Cierra Vega': 175, 'Alden Cantrell': 180, 'Kierra Gentry': 165, 'Pierre Cox': 190},180)=={ 'Alden Cantrell': 180, 'Pierre Cox': 190}", "assert dict_filter({'Cierra Vega': 175, 'Alden Cantrell': 180, 'Kierra Gentry': 165, 'Pierre Cox': 190},190)=={ 'Pierre Cox': 190}"], "challenge_test_list": []}
{"text": "Write a function to find the element count that occurs before the record in the given tuple.", "code": "def count_first_elements(test_tup):\r\n  for count, ele in enumerate(test_tup):\r\n    if isinstance(ele, tuple):\r\n      break\r\n  return (count) ", "task_id": 278, "test_setup_code": "", "test_list": ["assert count_first_elements((1, 5, 7, (4, 6), 10) ) == 3", "assert count_first_elements((2, 9, (5, 7), 11) ) == 2", "assert count_first_elements((11, 15, 5, 8, (2, 3), 8) ) == 4"], "challenge_test_list": []}
{"text": "Write a function to find the nth decagonal number.", "code": "def is_num_decagonal(n): \r\n\treturn 4 * n * n - 3 * n ", "task_id": 279, "test_setup_code": "", "test_list": ["assert is_num_decagonal(3) == 27", "assert is_num_decagonal(7) == 175", "assert is_num_decagonal(10) == 370"], "challenge_test_list": []}
{"text": "Write a function to search an element in the given array by using sequential search.", "code": "def sequential_search(dlist, item):\r\n    pos = 0\r\n    found = False\r\n    while pos < len(dlist) and not found:\r\n        if dlist[pos] == item:\r\n            found = True\r\n        else:\r\n            pos = pos + 1\r\n    return found, pos", "task_id": 280, "test_setup_code": "", "test_list": ["assert sequential_search([11,23,58,31,56,77,43,12,65,19],31) == (True, 3)", "assert sequential_search([12, 32, 45, 62, 35, 47, 44, 61],61) == (True, 7)", "assert sequential_search([9, 10, 17, 19, 22, 39, 48, 56],48) == (True, 6)"], "challenge_test_list": []}
{"text": "Write a python function to check if the elements of a given list are unique or not.", "code": "def all_unique(test_list):\r\n    if len(test_list) > len(set(test_list)):\r\n        return False\r\n    return True", "task_id": 281, "test_setup_code": "", "test_list": ["assert all_unique([1,2,3]) == True", "assert all_unique([1,2,1,2]) == False", "assert all_unique([1,2,3,4,5]) == True"], "challenge_test_list": []}
{"text": "Write a function to substaract two lists using map and lambda function.", "code": "def sub_list(nums1,nums2):\r\n  result = map(lambda x, y: x - y, nums1, nums2)\r\n  return list(result)", "task_id": 282, "test_setup_code": "", "test_list": ["assert sub_list([1, 2, 3],[4,5,6])==[-3,-3,-3]", "assert sub_list([1,2],[3,4])==[-2,-2]", "assert sub_list([90,120],[50,70])==[40,50]"], "challenge_test_list": []}
{"text": "Write a python function to check whether the frequency of each digit is less than or equal to the digit itself.", "code": "def validate(n): \r\n    for i in range(10): \r\n        temp = n;  \r\n        count = 0; \r\n        while (temp): \r\n            if (temp % 10 == i): \r\n                count+=1;  \r\n            if (count > i): \r\n                return False\r\n            temp //= 10; \r\n    return True", "task_id": 283, "test_setup_code": "", "test_list": ["assert validate(1234) == True", "assert validate(51241) == False", "assert validate(321) == True"], "challenge_test_list": []}
{"text": "Write a function to check whether all items of a list are equal to a given string.", "code": "def check_element(list,element):\r\n  check_element=all(v== element for v in list)\r\n  return check_element", "task_id": 284, "test_setup_code": "", "test_list": ["assert check_element([\"green\", \"orange\", \"black\", \"white\"],'blue')==False", "assert check_element([1,2,3,4],7)==False", "assert check_element([\"green\", \"green\", \"green\", \"green\"],'green')==True"], "challenge_test_list": []}
{"text": "Write a function that matches a string that has an a followed by two to three 'b'.", "code": "import re\r\ndef text_match_two_three(text):\r\n        patterns = 'ab{2,3}'\r\n        if re.search(patterns,  text):\r\n                return 'Found a match!'\r\n        else:\r\n                return('Not matched!')", "task_id": 285, "test_setup_code": "", "test_list": ["assert text_match_two_three(\"ac\")==('Not matched!')", "assert text_match_two_three(\"dc\")==('Not matched!')", "assert text_match_two_three(\"abbbba\")==('Found a match!')"], "challenge_test_list": []}
{"text": "Write a function to find the largest sum of contiguous array in the modified array which is formed by repeating the given array k times.", "code": "def max_sub_array_sum_repeated(a, n, k): \r\n\tmax_so_far = -2147483648\r\n\tmax_ending_here = 0\r\n\tfor i in range(n*k): \r\n\t\tmax_ending_here = max_ending_here + a[i%n] \r\n\t\tif (max_so_far < max_ending_here): \r\n\t\t\tmax_so_far = max_ending_here \r\n\t\tif (max_ending_here < 0): \r\n\t\t\tmax_ending_here = 0\r\n\treturn max_so_far", "task_id": 286, "test_setup_code": "", "test_list": ["assert max_sub_array_sum_repeated([10, 20, -30, -1], 4, 3) == 30", "assert max_sub_array_sum_repeated([-1, 10, 20], 3, 2) == 59", "assert max_sub_array_sum_repeated([-1, -2, -3], 3, 3) == -1"], "challenge_test_list": []}
{"text": "Write a python function to find the sum of squares of first n even natural numbers.", "code": "def square_Sum(n):  \r\n    return int(2*n*(n+1)*(2*n+1)/3)", "task_id": 287, "test_setup_code": "", "test_list": ["assert square_Sum(2) == 20", "assert square_Sum(3) == 56", "assert square_Sum(4) == 120"], "challenge_test_list": []}
{"text": "Write a function to count array elements having modular inverse under given prime number p equal to itself.", "code": "def modular_inverse(arr, N, P):\r\n\tcurrent_element = 0\r\n\tfor i in range(0, N):\r\n\t\tif ((arr[i] * arr[i]) % P == 1):\r\n\t\t\tcurrent_element = current_element + 1\r\n\treturn current_element", "task_id": 288, "test_setup_code": "", "test_list": ["assert modular_inverse([ 1, 6, 4, 5 ], 4, 7) == 2", "assert modular_inverse([1, 3, 8, 12, 12], 5, 13) == 3", "assert modular_inverse([2, 3, 4, 5], 4, 6) == 1"], "challenge_test_list": []}
{"text": "Write a python function to calculate the number of odd days in a given year.", "code": "def odd_Days(N): \r\n    hund1 = N // 100\r\n    hund4 = N // 400\r\n    leap = N >> 2\r\n    ordd = N - leap \r\n    if (hund1): \r\n        ordd += hund1 \r\n        leap -= hund1 \r\n    if (hund4): \r\n        ordd -= hund4 \r\n        leap += hund4 \r\n    days = ordd + leap * 2\r\n    odd = days % 7\r\n    return odd ", "task_id": 289, "test_setup_code": "", "test_list": ["assert odd_Days(100) == 5", "assert odd_Days(50) ==6", "assert odd_Days(75) == 2"], "challenge_test_list": []}
{"text": "Write a function to find the list of lists with maximum length.", "code": "def max_length(list1):\r\n    max_length = max(len(x) for x in  list1 )  \r\n    max_list = max((x) for x in   list1)\r\n    return(max_length, max_list)", "task_id": 290, "test_setup_code": "", "test_list": ["assert max_length([[0], [1, 3], [5, 7], [9, 11], [13, 15, 17]])==(3, [13, 15, 17])", "assert max_length([[1], [5, 7], [10, 12, 14,15]])==(4, [10, 12, 14,15])", "assert max_length([[5], [15,20,25]])==(3, [15,20,25])"], "challenge_test_list": []}
{"text": "Write a function to find out the number of ways of painting the fence such that at most 2 adjacent posts have the same color for the given fence with n posts and k colors.", "code": "def count_no_of_ways(n, k): \r\n\tdp = [0] * (n + 1) \r\n\ttotal = k \r\n\tmod = 1000000007\r\n\tdp[1] = k \r\n\tdp[2] = k * k\t \r\n\tfor i in range(3,n+1): \r\n\t\tdp[i] = ((k - 1) * (dp[i - 1] + dp[i - 2])) % mod \r\n\treturn dp[n]", "task_id": 291, "test_setup_code": "", "test_list": ["assert count_no_of_ways(2, 4) == 16", "assert count_no_of_ways(3, 2) == 6", "assert count_no_of_ways(4, 4) == 228"], "challenge_test_list": []}
{"text": "Write a python function to find quotient of two numbers.", "code": "def find(n,m):  \r\n    q = n//m \r\n    return (q)", "task_id": 292, "test_setup_code": "", "test_list": ["assert find(10,3) == 3", "assert find(4,2) == 2", "assert find(20,5) == 4"], "challenge_test_list": []}
{"text": "Write a function to find the third side of a right angled triangle.", "code": "import math\r\ndef otherside_rightangle(w,h):\r\n  s=math.sqrt((w*w)+(h*h))\r\n  return s", "task_id": 293, "test_setup_code": "", "test_list": ["assert otherside_rightangle(7,8)==10.63014581273465", "assert otherside_rightangle(3,4)==5", "assert otherside_rightangle(7,15)==16.55294535724685"], "challenge_test_list": []}
{"text": "Write a function to find the maximum value in a given heterogeneous list.", "code": "def max_val(listval):\r\n     max_val = max(i for i in listval if isinstance(i, int)) \r\n     return(max_val)", "task_id": 294, "test_setup_code": "", "test_list": ["assert max_val(['Python', 3, 2, 4, 5, 'version'])==5", "assert max_val(['Python', 15, 20, 25])==25", "assert max_val(['Python', 30, 20, 40, 50, 'version'])==50"], "challenge_test_list": []}
{"text": "Write a function to return the sum of all divisors of a number.", "code": "def sum_div(number):\r\n    divisors = [1]\r\n    for i in range(2, number):\r\n        if (number % i)==0:\r\n            divisors.append(i)\r\n    return sum(divisors)", "task_id": 295, "test_setup_code": "", "test_list": ["assert sum_div(8)==7", "assert sum_div(12)==16", "assert sum_div(7)==1"], "challenge_test_list": []}
{"text": "Write a python function to count inversions in an array.", "code": "def get_Inv_Count(arr,n): \r\n    inv_count = 0\r\n    for i in range(n): \r\n        for j in range(i + 1,n): \r\n            if (arr[i] > arr[j]): \r\n                inv_count += 1\r\n    return inv_count ", "task_id": 296, "test_setup_code": "", "test_list": ["assert get_Inv_Count([1,20,6,4,5],5) == 5", "assert get_Inv_Count([1,2,1],3) == 1", "assert get_Inv_Count([1,2,5,6,1],5) == 3"], "challenge_test_list": []}
{"text": "Write a function to flatten a given nested list structure.", "code": "def flatten_list(list1):\r\n    result_list = []\r\n    if not list1: return result_list\r\n    stack = [list(list1)]\r\n    while stack:\r\n        c_num = stack.pop()\r\n        next = c_num.pop()\r\n        if c_num: stack.append(c_num)\r\n        if isinstance(next, list):\r\n            if next: stack.append(list(next))\r\n        else: result_list.append(next)\r\n    result_list.reverse()\r\n    return result_list ", "task_id": 297, "test_setup_code": "", "test_list": ["assert flatten_list([0, 10, [20, 30], 40, 50, [60, 70, 80], [90, 100, 110, 120]])==[0, 10, 20, 30, 40, 50, 60, 70, 80, 90, 100, 110, 120]", "assert flatten_list([[10, 20], [40], [30, 56, 25], [10, 20], [33], [40]])==[10, 20, 40, 30, 56, 25, 10, 20, 33, 40]", "assert flatten_list([[1,2,3], [4,5,6], [10,11,12], [7,8,9]])==[1, 2, 3, 4, 5, 6, 10, 11, 12, 7, 8, 9]"], "challenge_test_list": []}
{"text": "Write a function to find the nested list elements which are present in another list.", "code": "def intersection_nested_lists(l1, l2):\r\n    result = [[n for n in lst if n in l1] for lst in l2]\r\n    return result", "task_id": 298, "test_setup_code": "", "test_list": ["assert intersection_nested_lists( [1, 2, 3, 4, 5, 6, 7, 8, 9, 10, 11, 12, 13, 14],[[12, 18, 23, 25, 45], [7, 11, 19, 24, 28], [1, 5, 8, 18, 15, 16]])==[[12], [7, 11], [1, 5, 8]]", "assert intersection_nested_lists([[2, 3, 1], [4, 5], [6, 8]], [[4, 5], [6, 8]])==[[], []]", "assert intersection_nested_lists(['john','amal','joel','george'],[['john'],['jack','john','mary'],['howard','john'],['jude']])==[['john'], ['john'], ['john'], []]"], "challenge_test_list": []}
{"text": "Write a function to calculate the maximum aggregate from the list of tuples.", "code": "from collections import defaultdict\r\ndef max_aggregate(stdata):\r\n    temp = defaultdict(int)\r\n    for name, marks in stdata:\r\n        temp[name] += marks\r\n    return max(temp.items(), key=lambda x: x[1])", "task_id": 299, "test_setup_code": "", "test_list": ["assert max_aggregate([('Juan Whelan',90),('Sabah Colley',88),('Peter Nichols',7),('Juan Whelan',122),('Sabah Colley',84)])==('Juan Whelan', 212)", "assert max_aggregate([('Juan Whelan',50),('Sabah Colley',48),('Peter Nichols',37),('Juan Whelan',22),('Sabah Colley',14)])==('Juan Whelan', 72)", "assert max_aggregate([('Juan Whelan',10),('Sabah Colley',20),('Peter Nichols',30),('Juan Whelan',40),('Sabah Colley',50)])==('Sabah Colley', 70)"], "challenge_test_list": []}
{"text": "Write a function to find the count of all binary sequences of length 2n such that sum of first n bits is same as sum of last n bits.", "code": "def count_binary_seq(n): \r\n\tnCr = 1\r\n\tres = 1\r\n\tfor r in range(1, n + 1): \r\n\t\tnCr = (nCr * (n + 1 - r)) / r \r\n\t\tres += nCr * nCr \r\n\treturn res ", "task_id": 300, "test_setup_code": "", "test_list": ["assert count_binary_seq(1) == 2.0", "assert count_binary_seq(2) == 6.0", "assert count_binary_seq(3) == 20.0"], "challenge_test_list": []}
{"text": "Write a function to find the depth of a dictionary.", "code": "def dict_depth(d):\r\n    if isinstance(d, dict):\r\n        return 1 + (max(map(dict_depth, d.values())) if d else 0)\r\n    return 0", "task_id": 301, "test_setup_code": "", "test_list": ["assert dict_depth({'a':1, 'b': {'c': {'d': {}}}})==4", "assert dict_depth({'a':1, 'b': {'c':'python'}})==2", "assert dict_depth({1: 'Sun', 2: {3: {4:'Mon'}}})==3"], "challenge_test_list": []}
{"text": "Write a python function to find the most significant bit number which is also a set bit.", "code": "def set_Bit_Number(n): \r\n    if (n == 0): \r\n        return 0; \r\n    msb = 0; \r\n    n = int(n / 2); \r\n    while (n > 0): \r\n        n = int(n / 2); \r\n        msb += 1; \r\n    return (1 << msb)", "task_id": 302, "test_setup_code": "", "test_list": ["assert set_Bit_Number(6) == 4", "assert set_Bit_Number(10) == 8", "assert set_Bit_Number(18) == 16"], "challenge_test_list": []}
{"text": "Write a python function to check whether the count of inversion of two types are same or not.", "code": "import sys \r\ndef solve(a,n):   \r\n    mx = -sys.maxsize - 1\r\n    for j in range(1,n):  \r\n        if (mx > a[j]):  \r\n            return False  \r\n        mx = max(mx,a[j - 1])    \r\n    return True", "task_id": 303, "test_setup_code": "", "test_list": ["assert solve([1,0,2],3) == True", "assert solve([1,2,0],3) == False", "assert solve([1,2,1],3) == True"], "challenge_test_list": []}
{"text": "Write a python function to find element at a given index after number of rotations.", "code": "def find_Element(arr,ranges,rotations,index) :  \r\n    for i in range(rotations - 1,-1,-1 ) : \r\n        left = ranges[i][0] \r\n        right = ranges[i][1] \r\n        if (left <= index and right >= index) : \r\n            if (index == left) : \r\n                index = right \r\n            else : \r\n                index = index - 1 \r\n    return arr[index] ", "task_id": 304, "test_setup_code": "", "test_list": ["assert find_Element([1,2,3,4,5],[[0,2],[0,3]],2,1) == 3", "assert find_Element([1,2,3,4],[[0,1],[0,2]],1,2) == 3", "assert find_Element([1,2,3,4,5,6],[[0,1],[0,2]],1,1) == 1"], "challenge_test_list": []}
{"text": "Write a function to match two words from a list of words starting with letter 'p'.", "code": "import re\r\ndef start_withp(words):\r\n for w in words:\r\n        m = re.match(\"(P\\w+)\\W(P\\w+)\", w)\r\n        if m:\r\n            return m.groups()", "task_id": 305, "test_setup_code": "", "test_list": ["assert start_withp([\"Python PHP\", \"Java JavaScript\", \"c c++\"])==('Python', 'PHP')", "assert start_withp([\"Python Programming\",\"Java Programming\"])==('Python','Programming')", "assert start_withp([\"Pqrst Pqr\",\"qrstuv\"])==('Pqrst','Pqr')"], "challenge_test_list": []}
{"text": "Write a function to find the maximum sum of increasing subsequence from prefix till ith index and also including a given kth element which is after i, i.e., k > i .", "code": "def max_sum_increasing_subseq(a, n, index, k):\r\n\tdp = [[0 for i in range(n)] \r\n\t\t\tfor i in range(n)]\r\n\tfor i in range(n):\r\n\t\tif a[i] > a[0]:\r\n\t\t\tdp[0][i] = a[i] + a[0]\r\n\t\telse:\r\n\t\t\tdp[0][i] = a[i]\r\n\tfor i in range(1, n):\r\n\t\tfor j in range(n):\r\n\t\t\tif a[j] > a[i] and j > i:\r\n\t\t\t\tif dp[i - 1][i] + a[j] > dp[i - 1][j]:\r\n\t\t\t\t\tdp[i][j] = dp[i - 1][i] + a[j]\r\n\t\t\t\telse:\r\n\t\t\t\t\tdp[i][j] = dp[i - 1][j]\r\n\t\t\telse:\r\n\t\t\t\tdp[i][j] = dp[i - 1][j]\r\n\treturn dp[index][k]", "task_id": 306, "test_setup_code": "", "test_list": ["assert max_sum_increasing_subseq([1, 101, 2, 3, 100, 4, 5 ], 7, 4, 6) == 11", "assert max_sum_increasing_subseq([1, 101, 2, 3, 100, 4, 5 ], 7, 2, 5) == 7", "assert max_sum_increasing_subseq([11, 15, 19, 21, 26, 28, 31], 7, 2, 4) == 71"], "challenge_test_list": []}
{"text": "Write a function to get a colon of a tuple.", "code": "from copy import deepcopy\r\ndef colon_tuplex(tuplex,m,n):\r\n  tuplex_colon = deepcopy(tuplex)\r\n  tuplex_colon[m].append(n)\r\n  return tuplex_colon", "task_id": 307, "test_setup_code": "", "test_list": ["assert colon_tuplex((\"HELLO\", 5, [], True) ,2,50)==(\"HELLO\", 5, [50], True) ", "assert colon_tuplex((\"HELLO\", 5, [], True) ,2,100)==((\"HELLO\", 5, [100],True))", "assert colon_tuplex((\"HELLO\", 5, [], True) ,2,500)==(\"HELLO\", 5, [500], True)"], "challenge_test_list": []}
{"text": "Write a function to find the specified number of largest products from two given lists.", "code": "def large_product(nums1, nums2, N):\r\n    result = sorted([x*y for x in nums1 for y in nums2], reverse=True)[:N]\r\n    return result", "task_id": 308, "test_setup_code": "", "test_list": ["assert large_product([1, 2, 3, 4, 5, 6],[3, 6, 8, 9, 10, 6],3)==[60, 54, 50]", "assert large_product([1, 2, 3, 4, 5, 6],[3, 6, 8, 9, 10, 6],4)==[60, 54, 50, 48]", "assert large_product([1, 2, 3, 4, 5, 6],[3, 6, 8, 9, 10, 6],5)==[60, 54, 50, 48, 45]"], "challenge_test_list": []}
{"text": "Write a python function to find the maximum of two numbers.", "code": "def maximum(a,b):   \r\n    if a >= b: \r\n        return a \r\n    else: \r\n        return b ", "task_id": 309, "test_setup_code": "", "test_list": ["assert maximum(5,10) == 10", "assert maximum(-1,-2) == -1", "assert maximum(9,7) == 9"], "challenge_test_list": []}
{"text": "Write a function to convert a given string to a tuple.", "code": "def string_to_tuple(str1):\r\n    result = tuple(x for x in str1 if not x.isspace()) \r\n    return result", "task_id": 310, "test_setup_code": "", "test_list": ["assert string_to_tuple(\"python 3.0\")==('p', 'y', 't', 'h', 'o', 'n', '3', '.', '0')", "assert string_to_tuple(\"item1\")==('i', 't', 'e', 'm', '1')", "assert string_to_tuple(\"15.10\")==('1', '5', '.', '1', '0')"], "challenge_test_list": []}
{"text": "Write a python function to set the left most unset bit.", "code": "def set_left_most_unset_bit(n): \r\n    if not (n & (n + 1)): \r\n        return n \r\n    pos, temp, count = 0, n, 0 \r\n    while temp: \r\n        if not (temp & 1): \r\n            pos = count      \r\n        count += 1; temp>>=1\r\n    return (n | (1 << (pos))) ", "task_id": 311, "test_setup_code": "", "test_list": ["assert set_left_most_unset_bit(10) == 14", "assert set_left_most_unset_bit(12) == 14", "assert set_left_most_unset_bit(15) == 15"], "challenge_test_list": []}
{"text": "Write a function to find the volume of a cone.", "code": "import math\r\ndef volume_cone(r,h):\r\n  volume = (1.0/3) * math.pi * r * r * h\r\n  return volume", "task_id": 312, "test_setup_code": "", "test_list": ["assert volume_cone(5,12)==314.15926535897927", "assert volume_cone(10,15)==1570.7963267948965", "assert volume_cone(19,17)==6426.651371693521"], "challenge_test_list": []}
{"text": "Write a python function to print positive numbers in a list.", "code": "def pos_nos(list1):\r\n  for num in list1: \r\n    if num >= 0: \r\n       return num ", "task_id": 313, "test_setup_code": "", "test_list": ["assert pos_nos([-1,-2,1,2]) == 1,2", "assert pos_nos([3,4,-5]) == 3,4", "assert pos_nos([-2,-3,1]) == 1"], "challenge_test_list": []}
{"text": "Write a function to find out the maximum sum such that no two chosen numbers are adjacent for the given rectangular grid of dimension 2 x n.", "code": "def max_sum_rectangular_grid(grid, n) : \r\n\tincl = max(grid[0][0], grid[1][0]) \r\n\texcl = 0\r\n\tfor i in range(1, n) : \r\n\t\texcl_new = max(excl, incl) \r\n\t\tincl = excl + max(grid[0][i], grid[1][i]) \r\n\t\texcl = excl_new \r\n\treturn max(excl, incl)", "task_id": 314, "test_setup_code": "", "test_list": ["assert max_sum_rectangular_grid([ [1, 4, 5], [2, 0, 0 ] ], 3) == 7", "assert max_sum_rectangular_grid([ [ 1, 2, 3, 4, 5], [ 6, 7, 8, 9, 10] ], 5) == 24", "assert max_sum_rectangular_grid([ [7, 9, 11, 15, 19], [21, 25, 28, 31, 32] ], 5) == 81"], "challenge_test_list": []}
{"text": "Write a python function to find the first maximum length of even word.", "code": "def find_Max_Len_Even(str): \r\n    n = len(str) \r\n    i = 0\r\n    currlen = 0\r\n    maxlen = 0\r\n    st = -1\r\n    while (i < n): \r\n        if (str[i] == ' '): \r\n            if (currlen % 2 == 0): \r\n                if (maxlen < currlen): \r\n                    maxlen = currlen \r\n                    st = i - currlen \r\n            currlen = 0 \r\n        else : \r\n            currlen += 1\r\n        i += 1\r\n    if (currlen % 2 == 0): \r\n        if (maxlen < currlen): \r\n            maxlen = currlen \r\n            st = i - currlen \r\n    if (st == -1): \r\n        return \"-1\" \r\n    return str[st: st + maxlen] ", "task_id": 315, "test_setup_code": "", "test_list": ["assert find_Max_Len_Even(\"python language\") == \"language\"", "assert find_Max_Len_Even(\"maximum even length\") == \"length\"", "assert find_Max_Len_Even(\"eve\") == \"-1\""], "challenge_test_list": []}
{"text": "Write a function to find the index of the last occurrence of a given number in a sorted array.", "code": "def find_last_occurrence(A, x):\r\n    (left, right) = (0, len(A) - 1)\r\n    result = -1\r\n    while left <= right:\r\n        mid = (left + right) // 2\r\n        if x == A[mid]:\r\n            result = mid\r\n            left = mid + 1\r\n        elif x < A[mid]:\r\n            right = mid - 1\r\n        else:\r\n            left = mid + 1\r\n    return result ", "task_id": 316, "test_setup_code": "", "test_list": ["assert find_last_occurrence([2, 5, 5, 5, 6, 6, 8, 9, 9, 9], 5) == 3", "assert find_last_occurrence([2, 3, 5, 8, 6, 6, 8, 9, 9, 9], 9) == 9", "assert find_last_occurrence([2, 2, 1, 5, 6, 6, 6, 9, 9, 9], 6) == 6"], "challenge_test_list": []}
{"text": "Write a function to reflect the modified run-length encoding from a list.", "code": "from itertools import groupby\r\ndef modified_encode(alist):\r\n        def ctr_ele(el):\r\n            if len(el)>1: return [len(el), el[0]]\r\n            else: return el[0]\r\n        return [ctr_ele(list(group)) for key, group in groupby(alist)]", "task_id": 317, "test_setup_code": "", "test_list": ["assert modified_encode([1,1,2,3,4,4,5,1])==[[2, 1], 2, 3, [2, 4], 5, 1]", "assert modified_encode('automatically')==['a', 'u', 't', 'o', 'm', 'a', 't', 'i', 'c', 'a', [2, 'l'], 'y']", "assert modified_encode('python')==['p', 'y', 't', 'h', 'o', 'n']"], "challenge_test_list": []}
{"text": "Write a python function to find the maximum volume of a cuboid with given sum of sides.", "code": "def max_volume (s): \r\n    maxvalue = 0\r\n    i = 1\r\n    for i in range(s - 1): \r\n        j = 1\r\n        for j in range(s): \r\n            k = s - i - j \r\n            maxvalue = max(maxvalue, i * j * k)         \r\n    return maxvalue ", "task_id": 318, "test_setup_code": "", "test_list": ["assert max_volume(8) == 18", "assert max_volume(4) == 2", "assert max_volume(1) == 0"], "challenge_test_list": []}
{"text": "Write a function to find all five characters long word in the given string by using regex.", "code": "import re\r\ndef find_long_word(text):\r\n  return (re.findall(r\"\\b\\w{5}\\b\", text))", "task_id": 319, "test_setup_code": "", "test_list": ["assert find_long_word('Please move back to strem') == ['strem']", "assert find_long_word('4K Ultra HD streaming player') == ['Ultra']", "assert find_long_word('Streaming Media Player') == ['Media']"], "challenge_test_list": []}
{"text": "Write a function to calculate the difference between the squared sum of first n natural numbers and the sum of squared first n natural numbers.", "code": "def sum_difference(n):\r\n    sumofsquares = 0\r\n    squareofsum = 0\r\n    for num in range(1, n+1):\r\n        sumofsquares += num * num\r\n        squareofsum += num\r\n    squareofsum = squareofsum ** 2\r\n    return squareofsum - sumofsquares", "task_id": 320, "test_setup_code": "", "test_list": ["assert sum_difference(12)==5434", "assert sum_difference(20)==41230", "assert sum_difference(54)==2151270"], "challenge_test_list": []}
{"text": "Write a function to find the demlo number for the given number.", "code": "def find_demlo(s): \r\n\tl = len(s) \r\n\tres = \"\" \r\n\tfor i in range(1,l+1): \r\n\t\tres = res + str(i) \r\n\tfor i in range(l-1,0,-1): \r\n\t\tres = res + str(i) \r\n\treturn res \t", "task_id": 321, "test_setup_code": "", "test_list": ["assert find_demlo(\"111111\") == '12345654321'", "assert find_demlo(\"1111\") == '1234321'", "assert find_demlo(\"13333122222\") == '123456789101110987654321'"], "challenge_test_list": []}
{"text": "Write a function to find all index positions of the minimum values in a given list.", "code": "def position_min(list1):\r\n    min_val = min(list1)\r\n    min_result = [i for i, j in enumerate(list1) if j == min_val]\r\n    return min_result", "task_id": 322, "test_setup_code": "", "test_list": ["assert position_min([12,33,23,10,67,89,45,667,23,12,11,10,54])==[3,11]", "assert position_min([1,2,2,2,4,4,4,5,5,5,5])==[0]", "assert position_min([2,1,5,6,8,3,4,9,10,11,8,12])==[1]"], "challenge_test_list": []}
{"text": "Write a function to re-arrange the given array in alternating positive and negative items.", "code": "def right_rotate(arr, n, out_of_place, cur):\r\n\ttemp = arr[cur]\r\n\tfor i in range(cur, out_of_place, -1):\r\n\t\tarr[i] = arr[i - 1]\r\n\tarr[out_of_place] = temp\r\n\treturn arr\r\ndef re_arrange(arr, n):\r\n\tout_of_place = -1\r\n\tfor index in range(n):\r\n\t\tif (out_of_place >= 0):\r\n\t\t\tif ((arr[index] >= 0 and arr[out_of_place] < 0) or\r\n\t\t\t(arr[index] < 0 and arr[out_of_place] >= 0)):\r\n\t\t\t\tarr = right_rotate(arr, n, out_of_place, index)\r\n\t\t\t\tif (index-out_of_place > 2):\r\n\t\t\t\t\tout_of_place += 2\r\n\t\t\t\telse:\r\n\t\t\t\t\tout_of_place = - 1\r\n\t\tif (out_of_place == -1):\r\n\t\t\tif ((arr[index] >= 0 and index % 2 == 0) or\r\n\t\t\t (arr[index] < 0 and index % 2 == 1)):\r\n\t\t\t\tout_of_place = index\r\n\treturn arr", "task_id": 323, "test_setup_code": "", "test_list": ["assert re_arrange([-5, -2, 5, 2, 4,\t7, 1, 8, 0, -8], 10) == [-5, 5, -2, 2, -8, 4, 7, 1, 8, 0]", "assert re_arrange([1, 2, 3, -4, -1, 4], 6) == [-4, 1, -1, 2, 3, 4]", "assert re_arrange([4, 7, 9, 77, -4, 5, -3, -9], 8) == [-4, 4, -3, 7, -9, 9, 77, 5]"], "challenge_test_list": []}
{"text": "Write a function to extract the sum of alternate chains of tuples.", "code": "def sum_of_alternates(test_tuple):\r\n  sum1 = 0\r\n  sum2 = 0\r\n  for idx, ele in enumerate(test_tuple):\r\n    if idx % 2:\r\n      sum1 += ele\r\n    else:\r\n      sum2 += ele\r\n  return ((sum1),(sum2)) ", "task_id": 324, "test_setup_code": "", "test_list": ["assert sum_of_alternates((5, 6, 3, 6, 10, 34)) == (46, 18)", "assert sum_of_alternates((1, 2, 3, 4, 5)) == (6, 9)", "assert sum_of_alternates((6, 7, 8, 9, 4, 5)) == (21, 18)"], "challenge_test_list": []}
{"text": "Write a python function to find the minimum number of squares whose sum is equal to a given number.", "code": "def get_Min_Squares(n):\r\n    if n <= 3:\r\n        return n;\r\n    res = n \r\n    for x in range(1,n + 1):\r\n        temp = x * x;\r\n        if temp > n:\r\n            break\r\n        else:\r\n            res = min(res,1 + get_Min_Squares(n  - temp)) \r\n    return res;", "task_id": 325, "test_setup_code": "", "test_list": ["assert get_Min_Squares(6) == 3", "assert get_Min_Squares(2) == 2", "assert get_Min_Squares(4) == 1"], "challenge_test_list": []}
{"text": "Write a function to get the word with most number of occurrences in the given strings list.", "code": "from collections import defaultdict \r\n\r\ndef most_occurrences(test_list):\r\n  temp = defaultdict(int)\r\n  for sub in test_list:\r\n    for wrd in sub.split():\r\n      temp[wrd] += 1\r\n  res = max(temp, key=temp.get)\r\n  return (str(res)) ", "task_id": 326, "test_setup_code": "", "test_list": ["assert most_occurrences([\"UTS is best for RTF\", \"RTF love UTS\", \"UTS is best\"] ) == 'UTS'", "assert most_occurrences([\"Its been a great year\", \"this year is so worse\", \"this year is okay\"] ) == 'year'", "assert most_occurrences([\"Families can be reunited\", \"people can be reunited\", \"Tasks can be achieved \"] ) == 'can'"], "challenge_test_list": []}
{"text": "Write a function to print check if the triangle is isosceles or not.", "code": "def check_isosceles(x,y,z):\r\n  if x==y or y==z or z==x:\r\n\t   return True\r\n  else:\r\n     return False", "task_id": 327, "test_setup_code": "", "test_list": ["assert check_isosceles(6,8,12)==False ", "assert check_isosceles(6,6,12)==True", "assert check_isosceles(6,16,20)==False"], "challenge_test_list": []}
{"text": "Write a function to rotate a given list by specified number of items to the left direction.", "code": "def rotate_left(list1,m,n):\r\n  result =  list1[m:]+list1[:n]\r\n  return result", "task_id": 328, "test_setup_code": "", "test_list": ["assert rotate_left([1, 2, 3, 4, 5, 6, 7, 8, 9, 10],3,4)==[4, 5, 6, 7, 8, 9, 10, 1, 2, 3, 4]", "assert rotate_left([1, 2, 3, 4, 5, 6, 7, 8, 9, 10],2,2)==[3, 4, 5, 6, 7, 8, 9, 10, 1, 2]", "assert rotate_left([1, 2, 3, 4, 5, 6, 7, 8, 9, 10],5,2)==[6, 7, 8, 9, 10, 1, 2]"], "challenge_test_list": []}
{"text": "Write a python function to count negative numbers in a list.", "code": "def neg_count(list):\r\n  neg_count= 0\r\n  for num in list: \r\n    if num <= 0: \r\n      neg_count += 1\r\n  return neg_count ", "task_id": 329, "test_setup_code": "", "test_list": ["assert neg_count([-1,-2,3,-4,-5]) == 4", "assert neg_count([1,2,3]) == 0", "assert neg_count([1,2,-3,-10,20]) == 2"], "challenge_test_list": []}
{"text": "Write a function to find all three, four, five characters long words in the given string by using regex.", "code": "import re\r\ndef find_char(text):\r\n  return (re.findall(r\"\\b\\w{3,5}\\b\", text))", "task_id": 330, "test_setup_code": "", "test_list": ["assert find_char('For the four consumer complaints contact manager AKR reddy') == ['For', 'the', 'four', 'AKR', 'reddy']", "assert find_char('Certain service are subject to change MSR') == ['are', 'MSR']", "assert find_char('Third party legal desclaimers') == ['Third', 'party', 'legal']"], "challenge_test_list": []}
{"text": "Write a python function to count unset bits of a given number.", "code": "def count_unset_bits(n): \r\n    count = 0\r\n    x = 1\r\n    while(x < n + 1): \r\n        if ((x & n) == 0): \r\n            count += 1\r\n        x = x << 1\r\n    return count  ", "task_id": 331, "test_setup_code": "", "test_list": ["assert count_unset_bits(2) == 1", "assert count_unset_bits(4) == 2", "assert count_unset_bits(6) == 1"], "challenge_test_list": []}
{"text": "Write a function to count character frequency of a given string.", "code": "def char_frequency(str1):\r\n    dict = {}\r\n    for n in str1:\r\n        keys = dict.keys()\r\n        if n in keys:\r\n            dict[n] += 1\r\n        else:\r\n            dict[n] = 1\r\n    return dict", "task_id": 332, "test_setup_code": "", "test_list": ["assert char_frequency('python')=={'p': 1, 'y': 1, 't': 1, 'h': 1, 'o': 1, 'n': 1}", "assert char_frequency('program')=={'p': 1, 'r': 2, 'o': 1, 'g': 1, 'a': 1, 'm': 1}", "assert char_frequency('language')=={'l': 1, 'a': 2, 'n': 1, 'g': 2, 'u': 1, 'e': 1}"], "challenge_test_list": []}
{"text": "Write a python function to sort a list according to the second element in sublist.", "code": "def Sort(sub_li): \r\n    sub_li.sort(key = lambda x: x[1]) \r\n    return sub_li ", "task_id": 333, "test_setup_code": "", "test_list": ["assert Sort([['a', 10], ['b', 5], ['c', 20], ['d', 15]]) == [['b', 5], ['a', 10], ['d', 15], ['c', 20]]", "assert Sort([['452', 10], ['256', 5], ['100', 20], ['135', 15]]) == [['256', 5], ['452', 10], ['135', 15], ['100', 20]]", "assert Sort([['rishi', 10], ['akhil', 5], ['ramya', 20], ['gaur', 15]]) == [['akhil', 5], ['rishi', 10], ['gaur', 15], ['ramya', 20]]"], "challenge_test_list": []}
{"text": "Write a python function to check whether the triangle is valid or not if sides are given.", "code": "def check_Validity(a,b,c):  \r\n    if (a + b <= c) or (a + c <= b) or (b + c <= a) : \r\n        return False\r\n    else: \r\n        return True        ", "task_id": 334, "test_setup_code": "", "test_list": ["assert check_Validity(1,2,3) == False", "assert check_Validity(2,3,5) == False", "assert check_Validity(7,10,5) == True"], "challenge_test_list": []}
{"text": "Write a function to find the sum of arithmetic progression.", "code": "def ap_sum(a,n,d):\r\n  total = (n * (2 * a + (n - 1) * d)) / 2\r\n  return total", "task_id": 335, "test_setup_code": "", "test_list": ["assert ap_sum(1,5,2)==25", "assert ap_sum(2,6,4)==72", "assert ap_sum(1,4,5)==34"], "challenge_test_list": []}
{"text": "Write a function to check whether the given month name contains 28 days or not.", "code": "def check_monthnum(monthname1):\r\n  if monthname1 == \"February\":\r\n    return True\r\n  else:\r\n    return False", "task_id": 336, "test_setup_code": "", "test_list": ["assert check_monthnum(\"February\")==True", "assert check_monthnum(\"January\")==False", "assert check_monthnum(\"March\")==False"], "challenge_test_list": []}
{"text": "Write a function that matches a word at the end of a string, with optional punctuation.", "code": "import re\r\ndef text_match_word(text):\r\n        patterns = '\\w+\\S*$'\r\n        if re.search(patterns,  text):\r\n                return 'Found a match!'\r\n        else:\r\n                return 'Not matched!'", "task_id": 337, "test_setup_code": "", "test_list": ["assert text_match_word(\"python.\")==('Found a match!')", "assert text_match_word(\"python.\")==('Found a match!')", "assert text_match_word(\"  lang  .\")==('Not matched!')"], "challenge_test_list": []}
{"text": "Write a python function to count the number of substrings with same first and last characters.", "code": "def check_Equality(s): \r\n    return (ord(s[0]) == ord(s[len(s) - 1])); \r\ndef count_Substring_With_Equal_Ends(s): \r\n    result = 0; \r\n    n = len(s); \r\n    for i in range(n):\r\n        for j in range(1,n-i+1): \r\n            if (check_Equality(s[i:i+j])): \r\n                result+=1; \r\n    return result; ", "task_id": 338, "test_setup_code": "", "test_list": ["assert count_Substring_With_Equal_Ends('aba') == 4", "assert count_Substring_With_Equal_Ends('abcab') == 7", "assert count_Substring_With_Equal_Ends('abc') == 3"], "challenge_test_list": []}
{"text": "Write a python function to find the maximum occuring divisor in an interval.", "code": "def find_Divisor(x,y):  \r\n    if (x==y): \r\n        return y \r\n    return 2", "task_id": 339, "test_setup_code": "", "test_list": ["assert find_Divisor(2,2) == 2", "assert find_Divisor(2,5) == 2", "assert find_Divisor(5,10) == 2"], "challenge_test_list": []}
{"text": "Write a python function to find the sum of the three lowest positive numbers from a given list of numbers.", "code": "def sum_three_smallest_nums(lst):\r\n\treturn sum(sorted([x for x in lst if x > 0])[:3])", "task_id": 340, "test_setup_code": "", "test_list": ["assert sum_three_smallest_nums([10,20,30,40,50,60,7]) == 37", "assert sum_three_smallest_nums([1,2,3,4,5]) == 6", "assert sum_three_smallest_nums([0,1,2,3,4,5]) == 6"], "challenge_test_list": []}
{"text": "Write a function to convert the given set into tuples.", "code": "def set_to_tuple(s):\r\n  t = tuple(s)\r\n  return (t)", "task_id": 341, "test_setup_code": "", "test_list": ["assert set_to_tuple({1, 2, 3, 4, 5}) == (1, 2, 3, 4, 5)", "assert set_to_tuple({6, 7, 8, 9, 10, 11}) == (6, 7, 8, 9, 10, 11)", "assert set_to_tuple({12, 13, 14, 15, 16}) == (12, 13, 14, 15, 16)"], "challenge_test_list": []}
{"text": "Write a function to find the smallest range that includes at-least one element from each of the given arrays.", "code": "from heapq import heappop, heappush\r\nclass Node:\r\n    def __init__(self, value, list_num, index):\r\n        self.value = value\r\n        self.list_num = list_num\r\n        self.index = index\r\n    def __lt__(self, other):\r\n        return self.value < other.value\r\ndef find_minimum_range(list):\r\n    high = float('-inf')\r\n    p = (0, float('inf'))\r\n    pq = []\r\n    for i in range(len(list)):\r\n        heappush(pq, Node(list[i][0], i, 0))\r\n        high = max(high, list[i][0])\r\n    while True:\r\n        top = heappop(pq)\r\n        low = top.value\r\n        i = top.list_num\r\n        j = top.index\r\n        if high - low < p[1] - p[0]:\r\n            p = (low, high)\r\n        if j == len(list[i]) - 1:\r\n            return p\r\n        heappush(pq, Node(list[i][j + 1], i, j + 1))\r\n        high = max(high, list[i][j + 1])", "task_id": 342, "test_setup_code": "", "test_list": ["assert find_minimum_range([[3, 6, 8, 10, 15], [1, 5, 12], [4, 8, 15, 16], [2, 6]]) == (4, 6)", "assert find_minimum_range([[ 2, 3, 4, 8, 10, 15 ], [1, 5, 12], [7, 8, 15, 16], [3, 6]]) == (4, 7)", "assert find_minimum_range([[4, 7, 9, 11, 16], [2, 6, 13], [5, 9, 16, 17], [3, 7]]) == (5, 7)"], "challenge_test_list": []}
{"text": "Write a function to calculate the number of digits and letters in a string.", "code": "def dig_let(s):\r\n d=l=0\r\n for c in s:\r\n    if c.isdigit():\r\n        d=d+1\r\n    elif c.isalpha():\r\n        l=l+1\r\n    else:\r\n        pass\r\n return (l,d)", "task_id": 343, "test_setup_code": "", "test_list": ["assert dig_let(\"python\")==(6,0)", "assert dig_let(\"program\")==(7,0)", "assert dig_let(\"python3.0\")==(6,2)"], "challenge_test_list": []}
{"text": "Write a python function to find number of elements with odd factors in a given range.", "code": "def count_Odd_Squares(n,m): \r\n    return int(m**0.5) - int((n-1)**0.5) ", "task_id": 344, "test_setup_code": "", "test_list": ["assert count_Odd_Squares(5,100) == 8", "assert count_Odd_Squares(8,65) == 6", "assert count_Odd_Squares(2,5) == 1"], "challenge_test_list": []}
{"text": "Write a function to find the difference between two consecutive numbers in a given list.", "code": "def diff_consecutivenums(nums):\r\n    result = [b-a for a, b in zip(nums[:-1], nums[1:])]\r\n    return result", "task_id": 345, "test_setup_code": "", "test_list": ["assert diff_consecutivenums([1, 1, 3, 4, 4, 5, 6, 7])==[0, 2, 1, 0, 1, 1, 1]", "assert diff_consecutivenums([4, 5, 8, 9, 6, 10])==[1, 3, 1, -3, 4]", "assert diff_consecutivenums([0, 1, 2, 3, 4, 4, 4, 4, 5, 7])==[1, 1, 1, 1, 0, 0, 0, 1, 2]"], "challenge_test_list": []}
{"text": "Write a function to find entringer number e(n, k).", "code": "def zigzag(n, k): \r\n\tif (n == 0 and k == 0): \r\n\t\treturn 1\r\n\tif (k == 0): \r\n\t\treturn 0\r\n\treturn zigzag(n, k - 1) + zigzag(n - 1, n - k)", "task_id": 346, "test_setup_code": "", "test_list": ["assert zigzag(4, 3) == 5", "assert zigzag(4, 2) == 4", "assert zigzag(3, 1) == 1"], "challenge_test_list": []}
{"text": "Write a python function to count the number of squares in a rectangle.", "code": "def count_Squares(m,n): \r\n    if (n < m): \r\n        temp = m \r\n        m = n \r\n        n = temp \r\n    return n * (n + 1) * (3 * m - n + 1) // 6", "task_id": 347, "test_setup_code": "", "test_list": ["assert count_Squares(4,3) == 20", "assert count_Squares(1,2) == 2", "assert count_Squares(2,2) == 5"], "challenge_test_list": []}
{"text": "Write a function to count sequences of given length having non-negative prefix sums that can be generated by given values.", "code": "def bin_coff(n, r): \r\n\tval = 1\r\n\tif (r > (n - r)): \r\n\t\tr = (n - r) \r\n\tfor i in range(0, r): \r\n\t\tval *= (n - i) \r\n\t\tval //= (i + 1) \r\n\treturn val \r\ndef find_ways(M): \r\n\tn = M // 2\r\n\ta = bin_coff(2 * n, n) \r\n\tb = a // (n + 1) \r\n\treturn (b) ", "task_id": 348, "test_setup_code": "", "test_list": ["assert find_ways(4) == 2", "assert find_ways(6) == 5", "assert find_ways(8) == 14"], "challenge_test_list": []}
{"text": "Write a python function to check whether the given string is a binary string or not.", "code": "def check(string) :\r\n    p = set(string) \r\n    s = {'0', '1'} \r\n    if s == p or p == {'0'} or p == {'1'}: \r\n        return (\"Yes\") \r\n    else : \r\n        return (\"No\") ", "task_id": 349, "test_setup_code": "", "test_list": ["assert check(\"01010101010\") == \"Yes\"", "assert check(\"name0\") == \"No\"", "assert check(\"101\") == \"Yes\""], "challenge_test_list": []}
{"text": "Write a python function to minimize the length of the string by removing occurrence of only one character.", "code": "def minimum_Length(s) : \r\n    maxOcc = 0\r\n    n = len(s) \r\n    arr = [0]*26\r\n    for i in range(n) : \r\n        arr[ord(s[i]) -ord('a')] += 1\r\n    for i in range(26) : \r\n        if arr[i] > maxOcc : \r\n            maxOcc = arr[i] \r\n    return n - maxOcc ", "task_id": 350, "test_setup_code": "", "test_list": ["assert minimum_Length(\"mnm\") == 1", "assert minimum_Length(\"abcda\") == 3", "assert minimum_Length(\"abcb\") == 2"], "challenge_test_list": []}
{"text": "Write a python function to find the first element occurring k times in a given array.", "code": "def first_Element(arr,n,k): \r\n    count_map = {}; \r\n    for i in range(0, n): \r\n        if(arr[i] in count_map.keys()): \r\n            count_map[arr[i]] += 1\r\n        else: \r\n            count_map[arr[i]] = 1\r\n        i += 1\r\n    for i in range(0, n):  \r\n        if (count_map[arr[i]] == k): \r\n            return arr[i] \r\n        i += 1 \r\n    return -1", "task_id": 351, "test_setup_code": "", "test_list": ["assert first_Element([0,1,2,3,4,5],6,1) == 0", "assert first_Element([1,2,1,3,4],5,2) == 1", "assert first_Element([2,3,4,3,5,7,1,2,3,5],10,2) == 2"], "challenge_test_list": []}
{"text": "Write a python function to check whether all the characters in a given string are unique.", "code": "def unique_Characters(str):\r\n    for i in range(len(str)):\r\n        for j in range(i + 1,len(str)): \r\n            if (str[i] == str[j]):\r\n                return False;\r\n    return True;", "task_id": 352, "test_setup_code": "", "test_list": ["assert unique_Characters('aba') == False", "assert unique_Characters('abc') == True", "assert unique_Characters('abab') == False"], "challenge_test_list": []}
{"text": "Write a function to remove a specified column from a given nested list.", "code": "def remove_column(list1, n):\r\n   for i in list1: \r\n    del i[n] \r\n   return list1", "task_id": 353, "test_setup_code": "", "test_list": ["assert remove_column([[1, 2, 3], [2, 4, 5], [1, 1, 1]],0)==[[2, 3], [4, 5], [1, 1]]", "assert remove_column([[1, 2, 3], [-2, 4, -5], [1, -1, 1]],2)==[[1, 2], [-2, 4], [1, -1]]", "assert remove_column([[1, 3], [5, 7], [1, 3], [13, 15, 17], [5, 7], [9, 11]],0)==[[3], [7], [3], [15, 17], [7], [11]]"], "challenge_test_list": []}
{"text": "Write a function to find t-nth term of arithemetic progression.", "code": "def tn_ap(a,n,d):\r\n  tn = a + (n - 1) * d\r\n  return tn", "task_id": 354, "test_setup_code": "", "test_list": ["assert tn_ap(1,5,2)==9", "assert tn_ap(2,6,4)==22", "assert tn_ap(1,4,5)==16"], "challenge_test_list": []}
{"text": "Write a python function to count the number of rectangles in a circle of radius r.", "code": "def count_Rectangles(radius):  \r\n    rectangles = 0 \r\n    diameter = 2 * radius \r\n    diameterSquare = diameter * diameter \r\n    for a in range(1, 2 * radius):  \r\n        for b in range(1, 2 * radius): \r\n            diagnalLengthSquare = (a * a +  b * b)  \r\n            if (diagnalLengthSquare <= diameterSquare) : \r\n                rectangles += 1\r\n    return rectangles ", "task_id": 355, "test_setup_code": "", "test_list": ["assert count_Rectangles(2) == 8", "assert count_Rectangles(1) == 1", "assert count_Rectangles(0) == 0"], "challenge_test_list": []}
{"text": "Write a function to find the third angle of a triangle using two angles.", "code": "def find_angle(a,b):\r\n c = 180 - (a + b)\r\n return c\r\n", "task_id": 356, "test_setup_code": "", "test_list": ["assert find_angle(47,89)==44", "assert find_angle(45,95)==40", "assert find_angle(50,40)==90"], "challenge_test_list": []}
{"text": "Write a function to find the maximum element of all the given tuple records.", "code": "def find_max(test_list):\r\n  res = max(int(j) for i in test_list for j in i)\r\n  return (res) ", "task_id": 357, "test_setup_code": "", "test_list": ["assert find_max([(2, 4), (6, 7), (5, 1), (6, 10), (8, 7)]) == 10", "assert find_max([(3, 5), (7, 8), (6, 2), (7, 11), (9, 8)]) == 11", "assert find_max([(4, 6), (8, 9), (7, 3), (8, 12), (10, 9)]) == 12"], "challenge_test_list": []}
{"text": "Write a function to find modulo division of two lists using map and lambda function.", "code": "def moddiv_list(nums1,nums2):\r\n  result = map(lambda x, y: x % y, nums1, nums2)\r\n  return list(result)", "task_id": 358, "test_setup_code": "", "test_list": ["assert moddiv_list([4,5,6],[1, 2, 3])==[0, 1, 0]", "assert moddiv_list([3,2],[1,4])==[0, 2]", "assert moddiv_list([90,120],[50,70])==[40, 50]"], "challenge_test_list": []}
{"text": "Write a python function to check whether one root of the quadratic equation is twice of the other or not.", "code": "def Check_Solution(a,b,c): \r\n    if (2*b*b == 9*a*c): \r\n        return (\"Yes\"); \r\n    else: \r\n        return (\"No\"); ", "task_id": 359, "test_setup_code": "", "test_list": ["assert Check_Solution(1,3,2) == \"Yes\"", "assert Check_Solution(1,2,3) == \"No\"", "assert Check_Solution(1,-5,6) == \"No\""], "challenge_test_list": []}
{"text": "Write a function to find the n\u2019th carol number.", "code": "def get_carol(n): \r\n\tresult = (2**n) - 1\r\n\treturn result * result - 2", "task_id": 360, "test_setup_code": "", "test_list": ["assert get_carol(2) == 7", "assert get_carol(4) == 223", "assert get_carol(5) == 959"], "challenge_test_list": []}
{"text": "Write a function to remove empty lists from a given list of lists.", "code": "def remove_empty(list1):\r\n  remove_empty = [x for x in list1 if x]\r\n  return remove_empty", "task_id": 361, "test_setup_code": "", "test_list": ["assert remove_empty([[], [], [], 'Red', 'Green', [1,2], 'Blue', [], []])==['Red', 'Green', [1, 2], 'Blue']", "assert remove_empty([[], [], [],[],[], 'Green', [1,2], 'Blue', [], []])==[ 'Green', [1, 2], 'Blue']", "assert remove_empty([[], [], [], 'Python',[],[], 'programming', 'language',[],[],[], [], []])==['Python', 'programming', 'language']"], "challenge_test_list": []}
{"text": "Write a python function to find the item with maximum occurrences in a given list.", "code": "def max_occurrences(nums):\r\n    max_val = 0\r\n    result = nums[0] \r\n    for i in nums:\r\n        occu = nums.count(i)\r\n        if occu > max_val:\r\n            max_val = occu\r\n            result = i \r\n    return result", "task_id": 362, "test_setup_code": "", "test_list": ["assert max_occurrences([1,2,3,1,2,3,12,4,2]) ==  2", "assert max_occurrences([1,2,6,7,0,1,0,1,0]) == 1,0", "assert max_occurrences([1,2,3,1,2,4,1]) == 1"], "challenge_test_list": []}
{"text": "Write a function to add the k elements to each element in the tuple.", "code": "def add_K_element(test_list, K):\r\n  res = [tuple(j + K for j in sub ) for sub in test_list]\r\n  return (res) ", "task_id": 363, "test_setup_code": "", "test_list": ["assert add_K_element([(1, 3, 4), (2, 4, 6), (3, 8, 1)], 4) == [(5, 7, 8), (6, 8, 10), (7, 12, 5)]", "assert add_K_element([(1, 2, 3), (4, 5, 6), (7, 8, 9)], 8) == [(9, 10, 11), (12, 13, 14), (15, 16, 17)]", "assert add_K_element([(11, 12, 13), (14, 15, 16), (17, 18, 19)], 9) == [(20, 21, 22), (23, 24, 25), (26, 27, 28)]"], "challenge_test_list": []}
{"text": "Write a function to find the number of flips required to make the given binary string a sequence of alternate characters.", "code": "def make_flip(ch): \r\n\treturn '1' if (ch == '0') else '0'\r\ndef get_flip_with_starting_charcter(str, expected): \r\n\tflip_count = 0\r\n\tfor i in range(len( str)): \r\n\t\tif (str[i] != expected): \r\n\t\t\tflip_count += 1\r\n\t\texpected = make_flip(expected) \r\n\treturn flip_count \r\ndef min_flip_to_make_string_alternate(str): \r\n\treturn min(get_flip_with_starting_charcter(str, '0'),get_flip_with_starting_charcter(str, '1')) ", "task_id": 364, "test_setup_code": "", "test_list": ["assert min_flip_to_make_string_alternate(\"0001010111\") == 2", "assert min_flip_to_make_string_alternate(\"001\") == 1", "assert min_flip_to_make_string_alternate(\"010111011\") == 2 "], "challenge_test_list": []}
{"text": "Write a python function to count the number of digits of a given number.", "code": "def count_Digit(n):\r\n    count = 0\r\n    while n != 0:\r\n        n //= 10\r\n        count += 1\r\n    return count", "task_id": 365, "test_setup_code": "", "test_list": ["assert count_Digit(12345) == 5", "assert count_Digit(11223305) == 8", "assert count_Digit(4123459) == 7"], "challenge_test_list": []}
{"text": "Write a python function to find the largest product of the pair of adjacent elements from a given list of integers.", "code": "def adjacent_num_product(list_nums):\r\n    return max(a*b for a, b in zip(list_nums, list_nums[1:]))", "task_id": 366, "test_setup_code": "", "test_list": ["assert adjacent_num_product([1,2,3,4,5,6]) == 30", "assert adjacent_num_product([1,2,3,4,5]) == 20", "assert adjacent_num_product([2,3]) == 6"], "challenge_test_list": []}
{"text": "Write a function to check if a binary tree is balanced or not.", "code": "class Node: \r\n\tdef __init__(self, data): \r\n\t\tself.data = data \r\n\t\tself.left = None\r\n\t\tself.right = None\r\ndef get_height(root): \r\n\tif root is None: \r\n\t\treturn 0\r\n\treturn max(get_height(root.left), get_height(root.right)) + 1\r\ndef is_tree_balanced(root): \r\n\tif root is None: \r\n\t\treturn True\r\n\tlh = get_height(root.left) \r\n\trh = get_height(root.right) \r\n\tif (abs(lh - rh) <= 1) and is_tree_balanced( \r\n\troot.left) is True and is_tree_balanced( root.right) is True: \r\n\t\treturn True\r\n\treturn False", "task_id": 367, "test_setup_code": "root = Node(1) \r\nroot.left = Node(2) \r\nroot.right = Node(3) \r\nroot.left.left = Node(4) \r\nroot.left.right = Node(5) \r\nroot.left.left.left = Node(8) \r\nroot1 = Node(1) \r\nroot1.left = Node(2) \r\nroot1.right = Node(3) \r\nroot1.left.left = Node(4) \r\nroot1.left.right = Node(5) \r\nroot1.right.left = Node(6) \r\nroot1.left.left.left = Node(7)\r\nroot2 = Node(1) \r\nroot2.left = Node(2) \r\nroot2.right = Node(3) \r\nroot2.left.left = Node(4) \r\nroot2.left.right = Node(5)\r\nroot2.left.left.left = Node(7)", "test_list": ["assert is_tree_balanced(root) == False", "assert is_tree_balanced(root1) == True", "assert is_tree_balanced(root2) == False "], "challenge_test_list": []}
{"text": "Write a function to repeat the given tuple n times.", "code": "def repeat_tuples(test_tup, N):\r\n  res = ((test_tup, ) * N)\r\n  return (res) ", "task_id": 368, "test_setup_code": "", "test_list": ["assert repeat_tuples((1, 3), 4) == ((1, 3), (1, 3), (1, 3), (1, 3))", "assert repeat_tuples((1, 2), 3) == ((1, 2), (1, 2), (1, 2))", "assert repeat_tuples((3, 4), 5) == ((3, 4), (3, 4), (3, 4), (3, 4), (3, 4))"], "challenge_test_list": []}
{"text": "Write a function to find the lateral surface area of cuboid", "code": "def lateralsurface_cuboid(l,w,h):\r\n  LSA = 2*h*(l+w)\r\n  return LSA", "task_id": 369, "test_setup_code": "", "test_list": ["assert lateralsurface_cuboid(8,5,6)==156", "assert lateralsurface_cuboid(7,9,10)==320", "assert lateralsurface_cuboid(10,20,30)==1800"], "challenge_test_list": []}
{"text": "Write a function to sort a tuple by its float element.", "code": "def float_sort(price):\r\n  float_sort=sorted(price, key=lambda x: float(x[1]), reverse=True)\r\n  return float_sort", "task_id": 370, "test_setup_code": "", "test_list": ["assert float_sort([('item1', '12.20'), ('item2', '15.10'), ('item3', '24.5')])==[('item3', '24.5'), ('item2', '15.10'), ('item1', '12.20')] ", "assert float_sort([('item1', '15'), ('item2', '10'), ('item3', '20')])==[('item3', '20'), ('item1', '15'), ('item2', '10')] ", "assert float_sort([('item1', '5'), ('item2', '10'), ('item3', '14')])==[('item3', '14'), ('item2', '10'), ('item1', '5')] "], "challenge_test_list": []}
{"text": "Write a function to find the smallest missing element in a sorted array.", "code": "def smallest_missing(A, left_element, right_element):\r\n    if left_element > right_element:\r\n        return left_element\r\n    mid = left_element + (right_element - left_element) // 2\r\n    if A[mid] == mid:\r\n        return smallest_missing(A, mid + 1, right_element)\r\n    else:\r\n        return smallest_missing(A, left_element, mid - 1)", "task_id": 371, "test_setup_code": "", "test_list": ["assert smallest_missing([0, 1, 2, 3, 4, 5, 6], 0, 6) == 7", "assert smallest_missing([0, 1, 2, 6, 9, 11, 15], 0, 6) == 3", "assert smallest_missing([1, 2, 3, 4, 6, 9, 11, 15], 0, 7) == 0"], "challenge_test_list": []}
{"text": "Write a function to sort a given list of elements in ascending order using heap queue algorithm.", "code": "import heapq as hq\r\ndef heap_assending(nums):\r\n  hq.heapify(nums)\r\n  s_result = [hq.heappop(nums) for i in range(len(nums))]\r\n  return s_result", "task_id": 372, "test_setup_code": "", "test_list": ["assert heap_assending([18, 14, 10, 9, 8, 7, 9, 3, 2, 4, 1])==[1, 2, 3, 4, 7, 8, 9, 9, 10, 14, 18]", "assert heap_assending([25, 35, 22, 85, 14, 65, 75, 25, 58])==[14, 22, 25, 25, 35, 58, 65, 75, 85]", "assert heap_assending([1, 3, 5, 7, 9, 2, 4, 6, 8, 0])==[0, 1, 2, 3, 4, 5, 6, 7, 8, 9]"], "challenge_test_list": []}
{"text": "Write a function to find the volume of a cuboid.", "code": "def volume_cuboid(l,w,h):\r\n  volume=l*w*h\r\n  return volume", "task_id": 373, "test_setup_code": "", "test_list": ["assert volume_cuboid(1,2,3)==6", "assert volume_cuboid(5,7,9)==315", "assert volume_cuboid(10,15,21)==3150"], "challenge_test_list": []}
{"text": "Write a function to print all permutations of a given string including duplicates.", "code": "def permute_string(str):\r\n    if len(str) == 0:\r\n        return ['']\r\n    prev_list = permute_string(str[1:len(str)])\r\n    next_list = []\r\n    for i in range(0,len(prev_list)):\r\n        for j in range(0,len(str)):\r\n            new_str = prev_list[i][0:j]+str[0]+prev_list[i][j:len(str)-1]\r\n            if new_str not in next_list:\r\n                next_list.append(new_str)\r\n    return next_list", "task_id": 374, "test_setup_code": "", "test_list": ["assert permute_string('ab')==['ab', 'ba']", "assert permute_string('abc')==['abc', 'bac', 'bca', 'acb', 'cab', 'cba']", "assert permute_string('abcd')==['abcd', 'bacd', 'bcad', 'bcda', 'acbd', 'cabd', 'cbad', 'cbda', 'acdb', 'cadb', 'cdab', 'cdba', 'abdc', 'badc', 'bdac', 'bdca', 'adbc', 'dabc', 'dbac', 'dbca', 'adcb', 'dacb', 'dcab', 'dcba']"], "challenge_test_list": []}
{"text": "Write a function to round the given number to the nearest multiple of a specific number.", "code": "def round_num(n,m):\r\n    a = (n //m) * m\r\n    b = a + m\r\n    return (b if n - a > b - n else a)", "task_id": 375, "test_setup_code": "", "test_list": ["assert round_num(4722,10)==4720", "assert round_num(1111,5)==1110", "assert round_num(219,2)==218"], "challenge_test_list": []}
{"text": "Write a function to remove tuple elements that occur more than once and replace the duplicates with some custom value.", "code": "def remove_replica(test_tup):\r\n  temp = set()\r\n  res = tuple(ele if ele not in temp and not temp.add(ele) \r\n\t\t\t\telse 'MSP' for ele in test_tup)\r\n  return (res)", "task_id": 376, "test_setup_code": "", "test_list": ["assert remove_replica((1, 1, 4, 4, 4, 5, 5, 6, 7, 7)) == (1, 'MSP', 4, 'MSP', 'MSP', 5, 'MSP', 6, 7, 'MSP')", "assert remove_replica((2, 3, 4, 4, 5, 6, 6, 7, 8, 9, 9)) == (2, 3, 4, 'MSP', 5, 6, 'MSP', 7, 8, 9, 'MSP')", "assert remove_replica((2, 2, 5, 4, 5, 7, 5, 6, 7, 7)) == (2, 'MSP', 5, 4, 'MSP', 7, 'MSP', 6, 'MSP', 'MSP')"], "challenge_test_list": []}
{"text": "Write a python function to remove all occurrences of a character in a given string.", "code": "def remove_Char(s,c) :  \r\n    counts = s.count(c) \r\n    s = list(s) \r\n    while counts :  \r\n        s.remove(c) \r\n        counts -= 1 \r\n    s = '' . join(s)   \r\n    return (s) ", "task_id": 377, "test_setup_code": "", "test_list": ["assert remove_Char(\"aba\",'a') == \"b\"", "assert remove_Char(\"toggle\",'g') == \"tole\"", "assert remove_Char(\"aabbc\",'b') == \"aac\""], "challenge_test_list": []}
{"text": "Write a python function to shift last element to first position in the given list.", "code": "def move_first(test_list):\r\n  test_list = test_list[-1:] + test_list[:-1]  \r\n  return test_list", "task_id": 378, "test_setup_code": "", "test_list": ["assert move_first([1,2,3,4]) == [4,1,2,3]", "assert move_first([0,1,2,3]) == [3,0,1,2]", "assert move_first([9,8,7,1]) == [1,9,8,7]"], "challenge_test_list": []}
{"text": "Write a function to find the surface area of a cuboid.", "code": "def surfacearea_cuboid(l,w,h):\r\n  SA = 2*(l*w + l * h + w * h)\r\n  return SA", "task_id": 379, "test_setup_code": "", "test_list": ["assert surfacearea_cuboid(1,2,3)==22", "assert surfacearea_cuboid(5,7,9)==286", "assert surfacearea_cuboid(10,15,21)==1350"], "challenge_test_list": []}
{"text": "Write a function to generate a two-dimensional array.", "code": "def multi_list(rownum,colnum):\r\n  multi_list = [[0 for col in range(colnum)] for row in range(rownum)]\r\n  for row in range(rownum):\r\n    for col in range(colnum):\r\n        multi_list[row][col]= row*col\r\n  return multi_list\r\n", "task_id": 380, "test_setup_code": "", "test_list": ["assert multi_list(3,4)==[[0, 0, 0, 0], [0, 1, 2, 3], [0, 2, 4, 6]] ", "assert multi_list(5,7)==[[0, 0, 0, 0, 0, 0, 0], [0, 1, 2, 3, 4, 5, 6], [0, 2, 4, 6, 8, 10, 12], [0, 3, 6, 9, 12, 15, 18], [0, 4, 8, 12, 16, 20, 24]]", "assert multi_list(10,15)==[[0, 0, 0, 0, 0, 0, 0, 0, 0, 0, 0, 0, 0, 0, 0], [0, 1, 2, 3, 4, 5, 6, 7, 8, 9, 10, 11, 12, 13, 14], [0, 2, 4, 6, 8, 10, 12, 14, 16, 18, 20, 22, 24, 26, 28], [0, 3, 6, 9, 12, 15, 18, 21, 24, 27, 30, 33, 36, 39, 42], [0, 4, 8, 12, 16, 20, 24, 28, 32, 36, 40, 44, 48, 52, 56], [0, 5, 10, 15, 20, 25, 30, 35, 40, 45, 50, 55, 60, 65, 70], [0, 6, 12, 18, 24, 30, 36, 42, 48, 54, 60, 66, 72, 78, 84], [0, 7, 14, 21, 28, 35, 42, 49, 56, 63, 70, 77, 84, 91, 98], [0, 8, 16, 24, 32, 40, 48, 56, 64, 72, 80, 88, 96, 104, 112], [0, 9, 18, 27, 36, 45, 54, 63, 72, 81, 90, 99, 108, 117, 126]]"], "challenge_test_list": []}
{"text": "Write a function to sort a list of lists by a given index of the inner list.", "code": "from operator import itemgetter\r\ndef index_on_inner_list(list_data, index_no):\r\n    result = sorted(list_data, key=itemgetter(index_no))\r\n    return result", "task_id": 381, "test_setup_code": "", "test_list": ["assert index_on_inner_list([('Greyson Fulton', 98, 99), ('Brady Kent', 97, 96), ('Wyatt Knott', 91, 94), ('Beau Turnbull', 94, 98)] ,0)==[('Beau Turnbull', 94, 98), ('Brady Kent', 97, 96), ('Greyson Fulton', 98, 99), ('Wyatt Knott', 91, 94)]", "assert index_on_inner_list([('Greyson Fulton', 98, 99), ('Brady Kent', 97, 96), ('Wyatt Knott', 91, 94), ('Beau Turnbull', 94, 98)] ,1)==[('Wyatt Knott', 91, 94), ('Beau Turnbull', 94, 98), ('Brady Kent', 97, 96), ('Greyson Fulton', 98, 99)]", "assert index_on_inner_list([('Greyson Fulton', 98, 99), ('Brady Kent', 97, 96), ('Wyatt Knott', 91, 94), ('Beau Turnbull', 94, 98)] ,2)==[('Wyatt Knott', 91, 94), ('Brady Kent', 97, 96), ('Beau Turnbull', 94, 98), ('Greyson Fulton', 98, 99)]"], "challenge_test_list": []}
{"text": "Write a function to find the number of rotations in a circularly sorted array.", "code": "def find_rotation_count(A):\r\n    (left, right) = (0, len(A) - 1)\r\n    while left <= right:\r\n        if A[left] <= A[right]:\r\n            return left\r\n        mid = (left + right) // 2\r\n        next = (mid + 1) % len(A)\r\n        prev = (mid - 1 + len(A)) % len(A)\r\n        if A[mid] <= A[next] and A[mid] <= A[prev]:\r\n            return mid\r\n        elif A[mid] <= A[right]:\r\n            right = mid - 1\r\n        elif A[mid] >= A[left]:\r\n            left = mid + 1\r\n    return -1", "task_id": 382, "test_setup_code": "", "test_list": ["assert find_rotation_count([8, 9, 10, 1, 2, 3, 4, 5, 6, 7]) == 3", "assert find_rotation_count([8, 9, 10,2, 5, 6]) == 3", "assert find_rotation_count([2, 5, 6, 8, 9, 10]) == 0"], "challenge_test_list": []}
{"text": "Write a python function to toggle all odd bits of a given number.", "code": "def even_bit_toggle_number(n) : \r\n    res = 0; count = 0; temp = n    \r\n    while(temp > 0 ) : \r\n        if (count % 2 == 0) : \r\n            res = res | (1 << count)      \r\n        count = count + 1\r\n        temp >>= 1 \r\n    return n ^ res ", "task_id": 383, "test_setup_code": "", "test_list": ["assert even_bit_toggle_number(10) == 15", "assert even_bit_toggle_number(20) == 1", "assert even_bit_toggle_number(30) == 11"], "challenge_test_list": []}
{"text": "Write a python function to find the frequency of the smallest value in a given array.", "code": "def frequency_Of_Smallest(n,arr): \r\n    mn = arr[0] \r\n    freq = 1\r\n    for i in range(1,n): \r\n        if (arr[i] < mn): \r\n            mn = arr[i] \r\n            freq = 1\r\n        elif (arr[i] == mn): \r\n            freq += 1\r\n    return freq ", "task_id": 384, "test_setup_code": "", "test_list": ["assert frequency_Of_Smallest(5,[1,2,3,4,3]) == 1", "assert frequency_Of_Smallest(7,[3,1,2,5,6,2,3]) == 1", "assert frequency_Of_Smallest(7,[3,3,6,3,7,4,9]) == 3"], "challenge_test_list": []}
{"text": "Write a function to find the n'th perrin number using recursion.", "code": "def get_perrin(n):\r\n  if (n == 0):\r\n    return 3\r\n  if (n == 1):\r\n    return 0\r\n  if (n == 2):\r\n    return 2 \r\n  return get_perrin(n - 2) + get_perrin(n - 3)", "task_id": 385, "test_setup_code": "", "test_list": ["assert get_perrin(9) == 12", "assert get_perrin(4) == 2", "assert get_perrin(6) == 5"], "challenge_test_list": []}
{"text": "Write a function to find out the minimum no of swaps required for bracket balancing in the given string.", "code": "def swap_count(s):\r\n\tchars = s\r\n\tcount_left = 0\r\n\tcount_right = 0\r\n\tswap = 0\r\n\timbalance = 0; \r\n\tfor i in range(len(chars)):\r\n\t\tif chars[i] == '[':\r\n\t\t\tcount_left += 1\r\n\t\t\tif imbalance > 0:\r\n\t\t\t\tswap += imbalance\r\n\t\t\t\timbalance -= 1\r\n\t\telif chars[i] == ']':\r\n\t\t\tcount_right += 1\r\n\t\t\timbalance = (count_right - count_left) \r\n\treturn swap", "task_id": 386, "test_setup_code": "", "test_list": ["assert swap_count(\"[]][][\") == 2", "assert swap_count(\"[[][]]\") == 0", "assert swap_count(\"[[][]]][\") == 1"], "challenge_test_list": []}
{"text": "Write a python function to check whether the hexadecimal number is even or odd.", "code": "def even_or_odd(N): \r\n    l = len(N) \r\n    if (N[l-1] =='0'or N[l-1] =='2'or \r\n        N[l-1] =='4'or N[l-1] =='6'or \r\n        N[l-1] =='8'or N[l-1] =='A'or \r\n        N[l-1] =='C'or N[l-1] =='E'): \r\n        return (\"Even\") \r\n    else: \r\n        return (\"Odd\") ", "task_id": 387, "test_setup_code": "", "test_list": ["assert even_or_odd(\"AB3454D\") ==\"Odd\"", "assert even_or_odd(\"ABC\") == \"Even\"", "assert even_or_odd(\"AAD\") == \"Odd\""], "challenge_test_list": []}
{"text": "Write a python function to find the highest power of 2 that is less than or equal to n.", "code": "def highest_Power_of_2(n): \r\n    res = 0; \r\n    for i in range(n, 0, -1): \r\n        if ((i & (i - 1)) == 0): \r\n            res = i; \r\n            break; \r\n    return res; ", "task_id": 388, "test_setup_code": "", "test_list": ["assert highest_Power_of_2(10) == 8", "assert highest_Power_of_2(19) == 16", "assert highest_Power_of_2(32) == 32"], "challenge_test_list": []}
{"text": "Write a function to find the n'th lucas number.", "code": "def find_lucas(n): \r\n\tif (n == 0): \r\n\t\treturn 2\r\n\tif (n == 1): \r\n\t\treturn 1\r\n\treturn find_lucas(n - 1) + find_lucas(n - 2) ", "task_id": 389, "test_setup_code": "", "test_list": ["assert find_lucas(9) == 76", "assert find_lucas(4) == 7", "assert find_lucas(3) == 4"], "challenge_test_list": []}
{"text": "Write a function to insert a given string at the beginning of all items in a list.", "code": "def add_string(list,string):\r\n add_string=[string.format(i) for i in  list]\r\n return add_string", "task_id": 390, "test_setup_code": "", "test_list": ["assert add_string([1,2,3,4],'temp{0}')==['temp1', 'temp2', 'temp3', 'temp4']", "assert add_string(['a','b','c','d'], 'python{0}')==[ 'pythona', 'pythonb', 'pythonc', 'pythond']", "assert add_string([5,6,7,8],'string{0}')==['string5', 'string6', 'string7', 'string8']"], "challenge_test_list": []}
{"text": "Write a function to convert more than one list to nested dictionary.", "code": "def convert_list_dictionary(l1, l2, l3):\r\n     result = [{x: {y: z}} for (x, y, z) in zip(l1, l2, l3)]\r\n     return result", "task_id": 391, "test_setup_code": "", "test_list": ["assert convert_list_dictionary([\"S001\", \"S002\", \"S003\", \"S004\"],[\"Adina Park\", \"Leyton Marsh\", \"Duncan Boyle\", \"Saim Richards\"] ,[85, 98, 89, 92])==[{'S001': {'Adina Park': 85}}, {'S002': {'Leyton Marsh': 98}}, {'S003': {'Duncan Boyle': 89}}, {'S004': {'Saim Richards': 92}}]", "assert convert_list_dictionary([\"abc\",\"def\",\"ghi\",\"jkl\"],[\"python\",\"program\",\"language\",\"programs\"],[100,200,300,400])==[{'abc':{'python':100}},{'def':{'program':200}},{'ghi':{'language':300}},{'jkl':{'programs':400}}]", "assert convert_list_dictionary([\"A1\",\"A2\",\"A3\",\"A4\"],[\"java\",\"C\",\"C++\",\"DBMS\"],[10,20,30,40])==[{'A1':{'java':10}},{'A2':{'C':20}},{'A3':{'C++':30}},{'A4':{'DBMS':40}}]"], "challenge_test_list": []}
{"text": "Write a function to find the maximum sum possible by using the given equation f(n) = max( (f(n/2) + f(n/3) + f(n/4) + f(n/5)), n).", "code": "def get_max_sum (n):\r\n\tres = list()\r\n\tres.append(0)\r\n\tres.append(1)\r\n\ti = 2\r\n\twhile i<n + 1:\r\n\t\tres.append(max(i, (res[int(i / 2)] \r\n\t\t\t\t\t\t+ res[int(i / 3)] +\r\n\t\t\t\t\t\t\tres[int(i / 4)]\r\n\t\t\t\t\t\t+ res[int(i / 5)])))\r\n\t\ti = i + 1\r\n\treturn res[n]", "task_id": 392, "test_setup_code": "", "test_list": ["assert get_max_sum(60) == 106", "assert get_max_sum(10) == 12", "assert get_max_sum(2) == 2"], "challenge_test_list": []}
{"text": "Write a function to find the list with maximum length using lambda function.", "code": "def max_length_list(input_list):\r\n    max_length = max(len(x) for x in input_list )   \r\n    max_list = max(input_list, key = lambda i: len(i))    \r\n    return(max_length, max_list)", "task_id": 393, "test_setup_code": "", "test_list": ["assert max_length_list([[0], [1, 3], [5, 7], [9, 11], [13, 15, 17]])==(3, [13, 15, 17])", "assert max_length_list([[1,2,3,4,5],[1,2,3,4],[1,2,3],[1,2],[1]])==(5,[1,2,3,4,5])", "assert max_length_list([[3,4,5],[6,7,8,9],[10,11,12]])==(4,[6,7,8,9])"], "challenge_test_list": []}
{"text": "Write a function to check if given tuple is distinct or not.", "code": "def check_distinct(test_tup):\r\n  res = True\r\n  temp = set()\r\n  for ele in test_tup:\r\n    if ele in temp:\r\n      res = False\r\n      break\r\n    temp.add(ele)\r\n  return (res) ", "task_id": 394, "test_setup_code": "", "test_list": ["assert check_distinct((1, 4, 5, 6, 1, 4)) == False", "assert check_distinct((1, 4, 5, 6)) == True", "assert check_distinct((2, 3, 4, 5, 6)) == True"], "challenge_test_list": []}
{"text": "Write a python function to find the first non-repeated character in a given string.", "code": "def first_non_repeating_character(str1):\r\n  char_order = []\r\n  ctr = {}\r\n  for c in str1:\r\n    if c in ctr:\r\n      ctr[c] += 1\r\n    else:\r\n      ctr[c] = 1 \r\n      char_order.append(c)\r\n  for c in char_order:\r\n    if ctr[c] == 1:\r\n      return c\r\n  return None", "task_id": 395, "test_setup_code": "", "test_list": ["assert first_non_repeating_character(\"abcabc\") == None", "assert first_non_repeating_character(\"abc\") == \"a\"", "assert first_non_repeating_character(\"ababc\") == \"c\""], "challenge_test_list": []}
{"text": "Write a function to check whether the given string starts and ends with the same character or not using regex.", "code": "import re  \r\nregex = r'^[a-z]$|^([a-z]).*\\1$'\r\ndef check_char(string): \r\n\tif(re.search(regex, string)): \r\n\t\treturn \"Valid\" \r\n\telse: \r\n\t\treturn \"Invalid\" ", "task_id": 396, "test_setup_code": "", "test_list": ["assert check_char(\"abba\") == \"Valid\"", "assert check_char(\"a\") == \"Valid\"", "assert check_char(\"abcd\") == \"Invalid\""], "challenge_test_list": []}
{"text": "Write a function to find the median of three specific numbers.", "code": "def median_numbers(a,b,c):\r\n if a > b:\r\n    if a < c:\r\n        median = a\r\n    elif b > c:\r\n        median = b\r\n    else:\r\n        median = c\r\n else:\r\n    if a > c:\r\n        median = a\r\n    elif b < c:\r\n        median = b\r\n    else:\r\n        median = c\r\n return median", "task_id": 397, "test_setup_code": "", "test_list": ["assert median_numbers(25,55,65)==55.0", "assert median_numbers(20,10,30)==20.0", "assert median_numbers(15,45,75)==45.0"], "challenge_test_list": []}
{"text": "Write a function to compute the sum of digits of each number of a given list.", "code": "def sum_of_digits(nums):\r\n    return sum(int(el) for n in nums for el in str(n) if el.isdigit())", "task_id": 398, "test_setup_code": "", "test_list": ["assert sum_of_digits([10,2,56])==14", "assert sum_of_digits([[10,20,4,5,'b',70,'a']])==19", "assert sum_of_digits([10,20,-4,5,-70])==19"], "challenge_test_list": []}
{"text": "Write a function to perform the mathematical bitwise xor operation across the given tuples.", "code": "def bitwise_xor(test_tup1, test_tup2):\r\n  res = tuple(ele1 ^ ele2 for ele1, ele2 in zip(test_tup1, test_tup2))\r\n  return (res) ", "task_id": 399, "test_setup_code": "", "test_list": ["assert bitwise_xor((10, 4, 6, 9), (5, 2, 3, 3)) == (15, 6, 5, 10)", "assert bitwise_xor((11, 5, 7, 10), (6, 3, 4, 4)) == (13, 6, 3, 14)", "assert bitwise_xor((12, 6, 8, 11), (7, 4, 5, 6)) == (11, 2, 13, 13)"], "challenge_test_list": []}
{"text": "Write a function to extract the frequency of unique tuples in the given list order irrespective.", "code": "def extract_freq(test_list):\r\n  res = len(list(set(tuple(sorted(sub)) for sub in test_list)))\r\n  return (res)", "task_id": 400, "test_setup_code": "", "test_list": ["assert extract_freq([(3, 4), (1, 2), (4, 3), (5, 6)] ) == 3", "assert extract_freq([(4, 15), (2, 3), (5, 4), (6, 7)] ) == 4", "assert extract_freq([(5, 16), (2, 3), (6, 5), (6, 9)] ) == 4"], "challenge_test_list": []}
{"text": "Write a function to perform index wise addition of tuple elements in the given two nested tuples.", "code": "def add_nested_tuples(test_tup1, test_tup2):\r\n  res = tuple(tuple(a + b for a, b in zip(tup1, tup2))\r\n   for tup1, tup2 in zip(test_tup1, test_tup2))\r\n  return (res) ", "task_id": 401, "test_setup_code": "", "test_list": ["assert add_nested_tuples(((1, 3), (4, 5), (2, 9), (1, 10)), ((6, 7), (3, 9), (1, 1), (7, 3))) == ((7, 10), (7, 14), (3, 10), (8, 13))", "assert add_nested_tuples(((2, 4), (5, 6), (3, 10), (2, 11)), ((7, 8), (4, 10), (2, 2), (8, 4))) == ((9, 12), (9, 16), (5, 12), (10, 15))", "assert add_nested_tuples(((3, 5), (6, 7), (4, 11), (3, 12)), ((8, 9), (5, 11), (3, 3), (9, 5))) == ((11, 14), (11, 18), (7, 14), (12, 17))"], "challenge_test_list": []}
{"text": "Write a function to compute the value of ncr%p.", "code": "def ncr_modp(n, r, p): \r\n    C = [0 for i in range(r+1)]   \r\n    C[0] = 1\r\n    for i in range(1, n+1): \r\n        for j in range(min(i, r), 0, -1): \r\n            C[j] = (C[j] + C[j-1]) % p   \r\n    return C[r] ", "task_id": 402, "test_setup_code": "", "test_list": ["assert ncr_modp(10,2,13)==6", "assert ncr_modp(15,12,43)==25", "assert ncr_modp(17,9,18)==10"], "challenge_test_list": []}
{"text": "Write a function to check if a url is valid or not using regex.", "code": "import re\r\ndef is_valid_URL(str):\r\n\tregex = (\"((http|https)://)(www.)?\" +\r\n\t\t\t\"[a-zA-Z0-9@:%._\\\\+~#?&//=]\" +\r\n\t\t\t\"{2,256}\\\\.[a-z]\" +\r\n\t\t\t\"{2,6}\\\\b([-a-zA-Z0-9@:%\" +\r\n\t\t\t\"._\\\\+~#?&//=]*)\")\r\n\tp = re.compile(regex)\r\n\tif (str == None):\r\n\t\treturn False\r\n\tif(re.search(p, str)):\r\n\t\treturn True\r\n\telse:\r\n\t\treturn False", "task_id": 403, "test_setup_code": "", "test_list": ["assert is_valid_URL(\"https://www.google.com\") == True", "assert is_valid_URL(\"https:/www.gmail.com\") == False", "assert is_valid_URL(\"https:// www.redit.com\") == False"], "challenge_test_list": []}
{"text": "Write a python function to find the minimum of two numbers.", "code": "def minimum(a,b):   \r\n    if a <= b: \r\n        return a \r\n    else: \r\n        return b ", "task_id": 404, "test_setup_code": "", "test_list": ["assert minimum(1,2) == 1", "assert minimum(-5,-4) == -5", "assert minimum(0,0) == 0"], "challenge_test_list": []}
{"text": "Write a function to check whether an element exists within a tuple.", "code": "def check_tuplex(tuplex,tuple1): \r\n  if tuple1 in tuplex:\r\n    return True\r\n  else:\r\n     return False", "task_id": 405, "test_setup_code": "", "test_list": ["assert check_tuplex((\"w\", 3, \"r\", \"e\", \"s\", \"o\", \"u\", \"r\", \"c\", \"e\"),'r')==True", "assert check_tuplex((\"w\", 3, \"r\", \"e\", \"s\", \"o\", \"u\", \"r\", \"c\", \"e\"),'5')==False", "assert check_tuplex((\"w\", 3, \"r\", \"e\", \"s\", \"o\", \"u\", \"r\", \"c\",\"e\"),3)==True"], "challenge_test_list": []}
{"text": "Write a python function to find the parity of a given number.", "code": "def find_Parity(x): \r\n    y = x ^ (x >> 1); \r\n    y = y ^ (y >> 2); \r\n    y = y ^ (y >> 4); \r\n    y = y ^ (y >> 8); \r\n    y = y ^ (y >> 16); \r\n    if (y & 1): \r\n        return (\"Odd Parity\"); \r\n    return (\"Even Parity\"); ", "task_id": 406, "test_setup_code": "", "test_list": ["assert find_Parity(12) == \"Even Parity\"", "assert find_Parity(7) == \"Odd Parity\"", "assert find_Parity(10) == \"Even Parity\""], "challenge_test_list": []}
{"text": "Write a function to create the next bigger number by rearranging the digits of a given number.", "code": "def rearrange_bigger(n):\r\n    nums = list(str(n))\r\n    for i in range(len(nums)-2,-1,-1):\r\n        if nums[i] < nums[i+1]:\r\n            z = nums[i:]\r\n            y = min(filter(lambda x: x > z[0], z))\r\n            z.remove(y)\r\n            z.sort()\r\n            nums[i:] = [y] + z\r\n            return int(\"\".join(nums))\r\n    return False", "task_id": 407, "test_setup_code": "", "test_list": ["assert rearrange_bigger(12)==21", "assert rearrange_bigger(10)==False", "assert rearrange_bigger(102)==120"], "challenge_test_list": []}
{"text": "Write a function to find k number of pairs which consist of one element from the first array and one element from the second array.", "code": "import heapq\r\ndef k_smallest_pairs(nums1, nums2, k):\r\n   queue = []\r\n   def push(i, j):\r\n       if i < len(nums1) and j < len(nums2):\r\n           heapq.heappush(queue, [nums1[i] + nums2[j], i, j])\r\n   push(0, 0)\r\n   pairs = []\r\n   while queue and len(pairs) < k:\r\n       _, i, j = heapq.heappop(queue)\r\n       pairs.append([nums1[i], nums2[j]])\r\n       push(i, j + 1)\r\n       if j == 0:\r\n           push(i + 1, 0)\r\n   return pairs", "task_id": 408, "test_setup_code": "", "test_list": ["assert k_smallest_pairs([1,3,7],[2,4,6],2)==[[1, 2], [1, 4]]", "assert k_smallest_pairs([1,3,7],[2,4,6],1)==[[1, 2]]", "assert k_smallest_pairs([1,3,7],[2,4,6],7)==[[1, 2], [1, 4], [3, 2], [1, 6], [3, 4], [3, 6], [7, 2]]"], "challenge_test_list": []}
{"text": "Write a function to find the minimum product from the pairs of tuples within a given list.", "code": "def min_product_tuple(list1):\r\n    result_min = min([abs(x * y) for x, y in list1] )\r\n    return result_min", "task_id": 409, "test_setup_code": "", "test_list": ["assert min_product_tuple([(2, 7), (2, 6), (1, 8), (4, 9)] )==8", "assert min_product_tuple([(10,20), (15,2), (5,10)] )==30", "assert min_product_tuple([(11,44), (10,15), (20,5), (12, 9)] )==100"], "challenge_test_list": []}
{"text": "Write a function to find the minimum value in a given heterogeneous list.", "code": "def min_val(listval):\r\n     min_val = min(i for i in listval if isinstance(i, int))\r\n     return min_val", "task_id": 410, "test_setup_code": "", "test_list": ["assert min_val(['Python', 3, 2, 4, 5, 'version'])==2", "assert min_val(['Python', 15, 20, 25])==15", "assert min_val(['Python', 30, 20, 40, 50, 'version'])==20"], "challenge_test_list": []}
{"text": "Write a function to convert the given snake case string to camel case string by using regex.", "code": "import re\r\ndef snake_to_camel(word):\r\n  return ''.join(x.capitalize() or '_' for x in word.split('_'))", "task_id": 411, "test_setup_code": "", "test_list": ["assert snake_to_camel('android_tv') == 'AndroidTv'", "assert snake_to_camel('google_pixel') == 'GooglePixel'", "assert snake_to_camel('apple_watch') == 'AppleWatch'"], "challenge_test_list": []}
{"text": "Write a python function to remove odd numbers from a given list.", "code": "def remove_odd(l):\r\n    for i in l:\r\n        if i % 2 != 0:\r\n            l.remove(i)\r\n    return l", "task_id": 412, "test_setup_code": "", "test_list": ["assert remove_odd([1,2,3]) == [2]", "assert remove_odd([2,4,6]) == [2,4,6]", "assert remove_odd([10,20,3]) == [10,20]"], "challenge_test_list": []}
{"text": "Write a function to extract the nth element from a given list of tuples.", "code": "def extract_nth_element(list1, n):\r\n    result = [x[n] for x in list1]\r\n    return result", "task_id": 413, "test_setup_code": "", "test_list": ["assert extract_nth_element([('Greyson Fulton', 98, 99), ('Brady Kent', 97, 96), ('Wyatt Knott', 91, 94), ('Beau Turnbull', 94, 98)] ,0)==['Greyson Fulton', 'Brady Kent', 'Wyatt Knott', 'Beau Turnbull']", "assert extract_nth_element([('Greyson Fulton', 98, 99), ('Brady Kent', 97, 96), ('Wyatt Knott', 91, 94), ('Beau Turnbull', 94, 98)] ,2)==[99, 96, 94, 98]", "assert extract_nth_element([('Greyson Fulton', 98, 99), ('Brady Kent', 97, 96), ('Wyatt Knott', 91, 94), ('Beau Turnbull', 94, 98)],1)==[98, 97, 91, 94]"], "challenge_test_list": []}
{"text": "Write a python function to check whether the value exists in a sequence or not.", "code": "def overlapping(list1,list2):  \r\n    c=0\r\n    d=0\r\n    for i in list1: \r\n        c+=1\r\n    for i in list2: \r\n        d+=1\r\n    for i in range(0,c): \r\n        for j in range(0,d): \r\n            if(list1[i]==list2[j]): \r\n                return 1\r\n    return 0", "task_id": 414, "test_setup_code": "", "test_list": ["assert overlapping([1,2,3,4,5],[6,7,8,9]) == False", "assert overlapping([1,2,3],[4,5,6]) == False", "assert overlapping([1,4,5],[1,4,5]) == True"], "challenge_test_list": []}
{"text": "Write a python function to find a pair with highest product from a given array of integers.", "code": "def max_Product(arr): \r\n    arr_len = len(arr) \r\n    if (arr_len < 2): \r\n        return (\"No pairs exists\")           \r\n    x = arr[0]; y = arr[1]      \r\n    for i in range(0,arr_len): \r\n        for j in range(i + 1,arr_len): \r\n            if (arr[i] * arr[j] > x * y): \r\n                x = arr[i]; y = arr[j] \r\n    return x,y    ", "task_id": 415, "test_setup_code": "", "test_list": ["assert max_Product([1,2,3,4,7,0,8,4]) == (7,8)", "assert max_Product([0,-1,-2,-4,5,0,-6]) == (-4,-6)", "assert max_Product([1,2,3]) == (2,3)"], "challenge_test_list": []}
{"text": "Write a function to find the maximum sum we can make by dividing number in three parts recursively and summing them up together for the given number.", "code": "MAX = 1000000\r\ndef breakSum(n): \r\n\tdp = [0]*(n+1) \r\n\tdp[0] = 0\r\n\tdp[1] = 1\r\n\tfor i in range(2, n+1): \r\n\t\tdp[i] = max(dp[int(i/2)] + dp[int(i/3)] + dp[int(i/4)], i); \r\n\treturn dp[n]", "task_id": 416, "test_setup_code": "", "test_list": ["assert breakSum(12) == 13", "assert breakSum(24) == 27", "assert breakSum(23) == 23"], "challenge_test_list": []}
{"text": "Write a function to find common first element in given list of tuple.", "code": "def group_tuples(Input): \r\n\tout = {} \r\n\tfor elem in Input: \r\n\t\ttry: \r\n\t\t\tout[elem[0]].extend(elem[1:]) \r\n\t\texcept KeyError: \r\n\t\t\tout[elem[0]] = list(elem) \r\n\treturn [tuple(values) for values in out.values()] ", "task_id": 417, "test_setup_code": "", "test_list": ["assert group_tuples([('x', 'y'), ('x', 'z'), ('w', 't')]) == [('x', 'y', 'z'), ('w', 't')]", "assert group_tuples([('a', 'b'), ('a', 'c'), ('d', 'e')]) == [('a', 'b', 'c'), ('d', 'e')]", "assert group_tuples([('f', 'g'), ('f', 'g'), ('h', 'i')]) == [('f', 'g', 'g'), ('h', 'i')]"], "challenge_test_list": []}
{"text": "Write a python function to find the sublist having maximum length.", "code": "def Find_Max(lst): \r\n    maxList = max((x) for x in lst) \r\n    return maxList", "task_id": 418, "test_setup_code": "", "test_list": ["assert Find_Max([['A'],['A','B'],['A','B','C']]) == ['A','B','C']", "assert Find_Max([[1],[1,2],[1,2,3]]) == [1,2,3]", "assert Find_Max([[1,1],[1,2,3],[1,5,6,1]]) == [1,5,6,1]"], "challenge_test_list": []}
{"text": "Write a function to round every number of a given list of numbers and print the total sum multiplied by the length of the list.", "code": "def round_and_sum(list1):\r\n  lenght=len(list1)\r\n  round_and_sum=sum(list(map(round,list1))* lenght)\r\n  return round_and_sum", "task_id": 419, "test_setup_code": "", "test_list": ["assert round_and_sum([22.4, 4.0, -16.22, -9.10, 11.00, -12.22, 14.20, -5.20, 17.50])==243", "assert round_and_sum([5,2,9,24.3,29])==345", "assert round_and_sum([25.0,56.7,89.2])==513"], "challenge_test_list": []}
{"text": "Write a python function to find the cube sum of first n even natural numbers.", "code": "def cube_Sum(n): \r\n    sum = 0\r\n    for i in range(1,n + 1): \r\n        sum += (2*i)*(2*i)*(2*i) \r\n    return sum", "task_id": 420, "test_setup_code": "", "test_list": ["assert cube_Sum(2) == 72", "assert cube_Sum(3) == 288", "assert cube_Sum(4) == 800"], "challenge_test_list": []}
{"text": "Write a function to concatenate each element of tuple by the delimiter.", "code": "def concatenate_tuple(test_tup):\r\n    delim = \"-\"\r\n    res = ''.join([str(ele) + delim for ele in test_tup])\r\n    res = res[ : len(res) - len(delim)]\r\n    return (str(res)) ", "task_id": 421, "test_setup_code": "", "test_list": ["assert concatenate_tuple((\"ID\", \"is\", 4, \"UTS\") ) == 'ID-is-4-UTS'", "assert concatenate_tuple((\"QWE\", \"is\", 4, \"RTY\") ) == 'QWE-is-4-RTY'", "assert concatenate_tuple((\"ZEN\", \"is\", 4, \"OP\") ) == 'ZEN-is-4-OP'"], "challenge_test_list": []}
{"text": "Write a python function to find the average of cubes of first n natural numbers.", "code": "def find_Average_Of_Cube(n):  \r\n    sum = 0\r\n    for i in range(1, n + 1): \r\n        sum += i * i * i  \r\n    return round(sum / n, 6) ", "task_id": 422, "test_setup_code": "", "test_list": ["assert find_Average_Of_Cube(2) == 4.5", "assert find_Average_Of_Cube(3) == 12", "assert find_Average_Of_Cube(1) == 1"], "challenge_test_list": []}
{"text": "Write a function to solve gold mine problem.", "code": "def get_maxgold(gold, m, n): \r\n    goldTable = [[0 for i in range(n)] \r\n                        for j in range(m)]   \r\n    for col in range(n-1, -1, -1): \r\n        for row in range(m):  \r\n            if (col == n-1): \r\n                right = 0\r\n            else: \r\n                right = goldTable[row][col+1] \r\n            if (row == 0 or col == n-1): \r\n                right_up = 0\r\n            else: \r\n                right_up = goldTable[row-1][col+1] \r\n            if (row == m-1 or col == n-1): \r\n                right_down = 0\r\n            else: \r\n                right_down = goldTable[row+1][col+1] \r\n            goldTable[row][col] = gold[row][col] + max(right, right_up, right_down) \r\n    res = goldTable[0][0] \r\n    for i in range(1, m): \r\n        res = max(res, goldTable[i][0])  \r\n    return res ", "task_id": 423, "test_setup_code": "", "test_list": ["assert get_maxgold([[1, 3, 1, 5],[2, 2, 4, 1],[5, 0, 2, 3],[0, 6, 1, 2]],4,4)==16", "assert get_maxgold([[10,20],[30,40]],2,2)==70", "assert get_maxgold([[4,9],[3,7]],2,2)==13"], "challenge_test_list": []}
{"text": "Write a function to extract only the rear index element of each string in the given tuple.", "code": "def extract_rear(test_tuple):\r\n  res = list(sub[len(sub) - 1] for sub in test_tuple)\r\n  return (res) ", "task_id": 424, "test_setup_code": "", "test_list": ["assert extract_rear(('Mers', 'for', 'Vers') ) == ['s', 'r', 's']", "assert extract_rear(('Avenge', 'for', 'People') ) == ['e', 'r', 'e']", "assert extract_rear(('Gotta', 'get', 'go') ) == ['a', 't', 'o']"], "challenge_test_list": []}
{"text": "Write a function to count the number of sublists containing a particular element.", "code": "def count_element_in_list(list1, x): \r\n    ctr = 0\r\n    for i in range(len(list1)): \r\n        if x in list1[i]: \r\n            ctr+= 1          \r\n    return ctr", "task_id": 425, "test_setup_code": "", "test_list": ["assert count_element_in_list([[1, 3], [5, 7], [1, 11], [1, 15, 7]],1)==3", "assert count_element_in_list([['A', 'B'], ['A', 'C'], ['A', 'D', 'E'], ['B', 'C', 'D']],'A')==3", "assert count_element_in_list([['A', 'B'], ['A', 'C'], ['A', 'D', 'E'], ['B', 'C', 'D']],'E')==1"], "challenge_test_list": []}
{"text": "Write a function to filter odd numbers using lambda function.", "code": "def filter_oddnumbers(nums):\r\n odd_nums = list(filter(lambda x: x%2 != 0, nums))\r\n return odd_nums", "task_id": 426, "test_setup_code": "", "test_list": ["assert filter_oddnumbers([1, 2, 3, 4, 5, 6, 7, 8, 9, 10])==[1,3,5,7,9]", "assert filter_oddnumbers([10,20,45,67,84,93])==[45,67,93]", "assert filter_oddnumbers([5,7,9,8,6,4,3])==[5,7,9,3]"], "challenge_test_list": []}
{"text": "Write a function to convert a date of yyyy-mm-dd format to dd-mm-yyyy format by using regex.", "code": "import re\r\ndef change_date_format(dt):\r\n        return re.sub(r'(\\d{4})-(\\d{1,2})-(\\d{1,2})', '\\\\3-\\\\2-\\\\1', dt)", "task_id": 427, "test_setup_code": "", "test_list": ["assert change_date_format(\"2026-01-02\") == '02-01-2026'", "assert change_date_format(\"2020-11-13\") == '13-11-2020'", "assert change_date_format(\"2021-04-26\") == '26-04-2021'"], "challenge_test_list": []}
{"text": "Write a function to sort the given array by using shell sort.", "code": "def shell_sort(my_list):\r\n    gap = len(my_list) // 2\r\n    while gap > 0:\r\n        for i in range(gap, len(my_list)):\r\n            current_item = my_list[i]\r\n            j = i\r\n            while j >= gap and my_list[j - gap] > current_item:\r\n                my_list[j] = my_list[j - gap]\r\n                j -= gap\r\n            my_list[j] = current_item\r\n        gap //= 2\r\n\r\n    return my_list", "task_id": 428, "test_setup_code": "", "test_list": ["assert shell_sort([12, 23, 4, 5, 3, 2, 12, 81, 56, 95]) == [2, 3, 4, 5, 12, 12, 23, 56, 81, 95]", "assert shell_sort([24, 22, 39, 34, 87, 73, 68]) == [22, 24, 34, 39, 68, 73, 87]", "assert shell_sort([32, 30, 16, 96, 82, 83, 74]) == [16, 30, 32, 74, 82, 83, 96]"], "challenge_test_list": []}
{"text": "Write a function to extract the elementwise and tuples from the given two tuples.", "code": "def and_tuples(test_tup1, test_tup2):\r\n  res = tuple(ele1 & ele2 for ele1, ele2 in zip(test_tup1, test_tup2))\r\n  return (res) ", "task_id": 429, "test_setup_code": "", "test_list": ["assert and_tuples((10, 4, 6, 9), (5, 2, 3, 3)) == (0, 0, 2, 1)", "assert and_tuples((1, 2, 3, 4), (5, 6, 7, 8)) == (1, 2, 3, 0)", "assert and_tuples((8, 9, 11, 12), (7, 13, 14, 17)) == (0, 9, 10, 0)"], "challenge_test_list": []}
{"text": "Write a function to find the directrix of a parabola.", "code": "def parabola_directrix(a, b, c): \r\n  directrix=((int)(c - ((b * b) + 1) * 4 * a ))\r\n  return directrix", "task_id": 430, "test_setup_code": "", "test_list": ["assert parabola_directrix(5,3,2)==-198", "assert parabola_directrix(9,8,4)==-2336", "assert parabola_directrix(2,4,6)==-130"], "challenge_test_list": []}
{"text": "Write a function that takes two lists and returns true if they have at least one common element.", "code": "def common_element(list1, list2):\r\n     result = False\r\n     for x in list1:\r\n         for y in list2:\r\n             if x == y:\r\n                 result = True\r\n                 return result", "task_id": 431, "test_setup_code": "", "test_list": ["assert common_element([1,2,3,4,5], [5,6,7,8,9])==True", "assert common_element([1,2,3,4,5], [6,7,8,9])==None", "assert common_element(['a','b','c'], ['d','b','e'])==True"], "challenge_test_list": []}
{"text": "Write a function to find the median of a trapezium.", "code": "def median_trapezium(base1,base2,height):\r\n median = 0.5 * (base1+ base2)\r\n return median", "task_id": 432, "test_setup_code": "", "test_list": ["assert median_trapezium(15,25,35)==20", "assert median_trapezium(10,20,30)==15", "assert median_trapezium(6,9,4)==7.5"], "challenge_test_list": []}
{"text": "Write a function to check whether the entered number is greater than the elements of the given array.", "code": "def check_greater(arr, number):\r\n  arr.sort()\r\n  if number > arr[-1]:\r\n    return ('Yes, the entered number is greater than those in the array')\r\n  else:\r\n    return ('No, entered number is less than those in the array')", "task_id": 433, "test_setup_code": "", "test_list": ["assert check_greater([1, 2, 3, 4, 5], 4) == 'No, entered number is less than those in the array'", "assert check_greater([2, 3, 4, 5, 6], 8) == 'Yes, the entered number is greater than those in the array'", "assert check_greater([9, 7, 4, 8, 6, 1], 11) == 'Yes, the entered number is greater than those in the array'"], "challenge_test_list": []}
{"text": "Write a function that matches a string that has an a followed by one or more b's.", "code": "import re\r\ndef text_match_one(text):\r\n        patterns = 'ab+?'\r\n        if re.search(patterns,  text):\r\n                return 'Found a match!'\r\n        else:\r\n                return('Not matched!')\r\n", "task_id": 434, "test_setup_code": "", "test_list": ["assert text_match_one(\"ac\")==('Not matched!')", "assert text_match_one(\"dc\")==('Not matched!')", "assert text_match_one(\"abba\")==('Found a match!')"], "challenge_test_list": []}
{"text": "Write a python function to find the last digit of a given number.", "code": "def last_Digit(n) :\r\n    return (n % 10) ", "task_id": 435, "test_setup_code": "", "test_list": ["assert last_Digit(123) == 3", "assert last_Digit(25) == 5", "assert last_Digit(30) == 0"], "challenge_test_list": []}
{"text": "Write a python function to print negative numbers in a list.", "code": "def neg_nos(list1):\r\n  for num in list1: \r\n    if num < 0: \r\n       return num ", "task_id": 436, "test_setup_code": "", "test_list": ["assert neg_nos([-1,4,5,-6]) == -1,-6", "assert neg_nos([-1,-2,3,4]) == -1,-2", "assert neg_nos([-7,-6,8,9]) == -7,-6"], "challenge_test_list": []}
{"text": "Write a function to remove odd characters in a string.", "code": "def remove_odd(str1):\r\n str2 = ''\r\n for i in range(1, len(str1) + 1):\r\n    if(i % 2 == 0):\r\n        str2 = str2 + str1[i - 1]\r\n return str2", "task_id": 437, "test_setup_code": "", "test_list": ["assert remove_odd(\"python\")==(\"yhn\")", "assert remove_odd(\"program\")==(\"rga\")", "assert remove_odd(\"language\")==(\"agae\")"], "challenge_test_list": []}
{"text": "Write a function to count bidirectional tuple pairs.", "code": "def count_bidirectional(test_list):\r\n  res = 0\r\n  for idx in range(0, len(test_list)):\r\n    for iidx in range(idx + 1, len(test_list)):\r\n      if test_list[iidx][0] == test_list[idx][1] and test_list[idx][1] == test_list[iidx][0]:\r\n        res += 1\r\n  return (str(res)) ", "task_id": 438, "test_setup_code": "", "test_list": ["assert count_bidirectional([(5, 6), (1, 2), (6, 5), (9, 1), (6, 5), (2, 1)] ) == '3'", "assert count_bidirectional([(5, 6), (1, 3), (6, 5), (9, 1), (6, 5), (2, 1)] ) == '2'", "assert count_bidirectional([(5, 6), (1, 2), (6, 5), (9, 2), (6, 5), (2, 1)] ) == '4'"], "challenge_test_list": []}
{"text": "Write a function to convert a list of multiple integers into a single integer.", "code": "def multiple_to_single(L):\r\n  x = int(\"\".join(map(str, L)))\r\n  return x", "task_id": 439, "test_setup_code": "", "test_list": ["assert multiple_to_single([11, 33, 50])==113350", "assert multiple_to_single([-1,2,3,4,5,6])==-123456", "assert multiple_to_single([10,15,20,25])==10152025"], "challenge_test_list": []}
{"text": "Write a function to find all adverbs and their positions in a given sentence.", "code": "import re\r\ndef find_adverb_position(text):\r\n for m in re.finditer(r\"\\w+ly\", text):\r\n    return (m.start(), m.end(), m.group(0))", "task_id": 440, "test_setup_code": "", "test_list": ["assert find_adverb_position(\"clearly!! we can see the sky\")==(0, 7, 'clearly')", "assert find_adverb_position(\"seriously!! there are many roses\")==(0, 9, 'seriously')", "assert find_adverb_position(\"unfortunately!! sita is going to home\")==(0, 13, 'unfortunately')"], "challenge_test_list": []}
{"text": "Write a function to find the surface area of a cube.", "code": "def surfacearea_cube(l):\r\n  surfacearea= 6*l*l\r\n  return surfacearea", "task_id": 441, "test_setup_code": "", "test_list": ["assert surfacearea_cube(5)==150", "assert surfacearea_cube(3)==54", "assert surfacearea_cube(10)==600"], "challenge_test_list": []}
{"text": "Write a function to find the ration of positive numbers in an array of integers.", "code": "from array import array\r\ndef positive_count(nums):\r\n    n = len(nums)\r\n    n1 = 0\r\n    for x in nums:\r\n        if x > 0:\r\n            n1 += 1\r\n        else:\r\n          None\r\n    return round(n1/n,2)", "task_id": 442, "test_setup_code": "", "test_list": ["assert positive_count([0, 1, 2, -1, -5, 6, 0, -3, -2, 3, 4, 6, 8])==0.54", "assert positive_count([2, 1, 2, -1, -5, 6, 4, -3, -2, 3, 4, 6, 8])==0.69", "assert positive_count([2, 4, -6, -9, 11, -12, 14, -5, 17])==0.56"], "challenge_test_list": []}
{"text": "Write a python function to find the largest negative number from the given list.", "code": "def largest_neg(list1): \r\n    max = list1[0] \r\n    for x in list1: \r\n        if x < max : \r\n             max = x  \r\n    return max", "task_id": 443, "test_setup_code": "", "test_list": ["assert largest_neg([1,2,3,-4,-6]) == -6", "assert largest_neg([1,2,3,-8,-9]) == -9", "assert largest_neg([1,2,3,4,-1]) == -1"], "challenge_test_list": []}
{"text": "Write a function to trim each tuple by k in the given tuple list.", "code": "def trim_tuple(test_list, K):\r\n  res = []\r\n  for ele in test_list:\r\n    N = len(ele)\r\n    res.append(tuple(list(ele)[K: N - K]))\r\n  return (str(res)) ", "task_id": 444, "test_setup_code": "", "test_list": ["assert trim_tuple([(5, 3, 2, 1, 4), (3, 4, 9, 2, 1),(9, 1, 2, 3, 5), (4, 8, 2, 1, 7)], 2) == '[(2,), (9,), (2,), (2,)]'", "assert trim_tuple([(5, 3, 2, 1, 4), (3, 4, 9, 2, 1), (9, 1, 2, 3, 5), (4, 8, 2, 1, 7)], 1) == '[(3, 2, 1), (4, 9, 2), (1, 2, 3), (8, 2, 1)]'", "assert trim_tuple([(7, 8, 4, 9), (11, 8, 12, 4),(4, 1, 7, 8), (3, 6, 9, 7)], 1) == '[(8, 4), (8, 12), (1, 7), (6, 9)]'"], "challenge_test_list": []}
{"text": "Write a function to perform index wise multiplication of tuple elements in the given two tuples.", "code": "def index_multiplication(test_tup1, test_tup2):\r\n  res = tuple(tuple(a * b for a, b in zip(tup1, tup2))\r\n   for tup1, tup2 in zip(test_tup1, test_tup2))\r\n  return (res) ", "task_id": 445, "test_setup_code": "", "test_list": ["assert index_multiplication(((1, 3), (4, 5), (2, 9), (1, 10)),((6, 7), (3, 9), (1, 1), (7, 3)) ) == ((6, 21), (12, 45), (2, 9), (7, 30))", "assert index_multiplication(((2, 4), (5, 6), (3, 10), (2, 11)),((7, 8), (4, 10), (2, 2), (8, 4)) ) == ((14, 32), (20, 60), (6, 20), (16, 44))", "assert index_multiplication(((3, 5), (6, 7), (4, 11), (3, 12)),((8, 9), (5, 11), (3, 3), (9, 5)) ) == ((24, 45), (30, 77), (12, 33), (27, 60))"], "challenge_test_list": []}
{"text": "Write a python function to count the occurence of all elements of list in a tuple.", "code": "from collections import Counter \r\ndef count_Occurrence(tup, lst): \r\n    count = 0\r\n    for item in tup: \r\n        if item in lst: \r\n            count+= 1 \r\n    return count  ", "task_id": 446, "test_setup_code": "", "test_list": ["assert count_Occurrence(('a', 'a', 'c', 'b', 'd'),['a', 'b'] ) == 3", "assert count_Occurrence((1, 2, 3, 1, 4, 6, 7, 1, 4),[1, 4, 7]) == 6", "assert count_Occurrence((1,2,3,4,5,6),[1,2]) == 2"], "challenge_test_list": []}
{"text": "Write a function to find cubes of individual elements in a list using lambda function.", "code": "def cube_nums(nums):\r\n cube_nums = list(map(lambda x: x ** 3, nums))\r\n return cube_nums", "task_id": 447, "test_setup_code": "", "test_list": ["assert cube_nums([1, 2, 3, 4, 5, 6, 7, 8, 9, 10])==[1, 8, 27, 64, 125, 216, 343, 512, 729, 1000]", "assert cube_nums([10,20,30])==([1000, 8000, 27000])", "assert cube_nums([12,15])==([1728, 3375])"], "challenge_test_list": []}
{"text": "Write a function to calculate the sum of perrin numbers.", "code": "def cal_sum(n): \r\n\ta = 3\r\n\tb = 0\r\n\tc = 2\r\n\tif (n == 0): \r\n\t\treturn 3\r\n\tif (n == 1): \r\n\t\treturn 3\r\n\tif (n == 2): \r\n\t\treturn 5\r\n\tsum = 5\r\n\twhile (n > 2): \r\n\t\td = a + b \r\n\t\tsum = sum + d \r\n\t\ta = b \r\n\t\tb = c \r\n\t\tc = d \r\n\t\tn = n-1\r\n\treturn sum", "task_id": 448, "test_setup_code": "", "test_list": ["assert cal_sum(9) == 49", "assert cal_sum(10) == 66", "assert cal_sum(11) == 88"], "challenge_test_list": []}
{"text": "Write a python function to check whether the triangle is valid or not if 3 points are given.", "code": "def check_Triangle(x1,y1,x2,y2,x3,y3): \r\n    a = (x1*(y2-y3)+x2*(y3-y1)+x3*(y1-y2))   \r\n    if a == 0: \r\n        return ('No') \r\n    else: \r\n        return ('Yes') ", "task_id": 449, "test_setup_code": "", "test_list": ["assert check_Triangle(1,5,2,5,4,6) == 'Yes'", "assert check_Triangle(1,1,1,4,1,5) == 'No'", "assert check_Triangle(1,1,1,1,1,1) == 'No'"], "challenge_test_list": []}
{"text": "Write a function to extract specified size of strings from a give list of string values.", "code": "def extract_string(str, l):\r\n    result = [e for e in str if len(e) == l] \r\n    return result", "task_id": 450, "test_setup_code": "", "test_list": ["assert extract_string(['Python', 'list', 'exercises', 'practice', 'solution'] ,8)==['practice', 'solution']", "assert extract_string(['Python', 'list', 'exercises', 'practice', 'solution'] ,6)==['Python']", "assert extract_string(['Python', 'list', 'exercises', 'practice', 'solution'] ,9)==['exercises']"], "challenge_test_list": []}
{"text": "Write a function to remove all whitespaces from the given string using regex.", "code": "import re\r\ndef remove_whitespaces(text1):\r\n  return (re.sub(r'\\s+', '',text1))", "task_id": 451, "test_setup_code": "", "test_list": ["assert remove_whitespaces(' Google    Flutter ') == 'GoogleFlutter'", "assert remove_whitespaces(' Google    Dart ') == 'GoogleDart'", "assert remove_whitespaces(' iOS    Swift ') == 'iOSSwift'"], "challenge_test_list": []}
{"text": "Write a function that gives loss amount if the given amount has loss else return none.", "code": "def loss_amount(actual_cost,sale_amount): \r\n  if(sale_amount > actual_cost):\r\n    amount = sale_amount - actual_cost\r\n    return amount\r\n  else:\r\n    return None", "task_id": 452, "test_setup_code": "", "test_list": ["assert loss_amount(1500,1200)==None", "assert loss_amount(100,200)==100", "assert loss_amount(2000,5000)==3000"], "challenge_test_list": []}
{"text": "Write a python function to find the sum of even factors of a number.", "code": "import math \r\ndef sumofFactors(n) : \r\n    if (n % 2 != 0) : \r\n        return 0\r\n    res = 1\r\n    for i in range(2, (int)(math.sqrt(n)) + 1) :    \r\n        count = 0\r\n        curr_sum = 1\r\n        curr_term = 1\r\n        while (n % i == 0) : \r\n            count= count + 1\r\n            n = n // i \r\n            if (i == 2 and count == 1) : \r\n                curr_sum = 0\r\n            curr_term = curr_term * i \r\n            curr_sum = curr_sum + curr_term \r\n        res = res * curr_sum  \r\n    if (n >= 2) : \r\n        res = res * (1 + n) \r\n    return res ", "task_id": 453, "test_setup_code": "", "test_list": ["assert sumofFactors(18) == 26", "assert sumofFactors(30) == 48", "assert sumofFactors(6) == 8"], "challenge_test_list": []}
{"text": "Write a function that matches a word containing 'z'.", "code": "import re\r\ndef text_match_wordz(text):\r\n        patterns = '\\w*z.\\w*'\r\n        if re.search(patterns,  text):\r\n                return 'Found a match!'\r\n        else:\r\n                return('Not matched!')", "task_id": 454, "test_setup_code": "", "test_list": ["assert text_match_wordz(\"pythonz.\")==('Found a match!')", "assert text_match_wordz(\"xyz.\")==('Found a match!')", "assert text_match_wordz(\"  lang  .\")==('Not matched!')"], "challenge_test_list": []}
{"text": "Write a function to check whether the given month number contains 31 days or not.", "code": "def check_monthnumb_number(monthnum2):\r\n  if(monthnum2==1 or monthnum2==3 or monthnum2==5 or monthnum2==7 or monthnum2==8 or monthnum2==10 or monthnum2==12):\r\n    return True\r\n  else:\r\n    return False", "task_id": 455, "test_setup_code": "", "test_list": ["assert check_monthnumb_number(5)==True", "assert check_monthnumb_number(2)==False", "assert check_monthnumb_number(6)==False"], "challenge_test_list": []}
{"text": "Write a function to reverse strings in a given list of string values.", "code": "def reverse_string_list(stringlist):\r\n    result = [x[::-1] for x in stringlist]\r\n    return result", "task_id": 456, "test_setup_code": "", "test_list": ["assert reverse_string_list(['Red', 'Green', 'Blue', 'White', 'Black'])==['deR', 'neerG', 'eulB', 'etihW', 'kcalB']", "assert reverse_string_list(['john','amal','joel','george'])==['nhoj','lama','leoj','egroeg']", "assert reverse_string_list(['jack','john','mary'])==['kcaj','nhoj','yram']"], "challenge_test_list": []}
{"text": "Write a python function to find the sublist having minimum length.", "code": "def Find_Min(lst): \r\n    minList = min((x) for x in lst) \r\n    return minList", "task_id": 457, "test_setup_code": "", "test_list": ["assert Find_Min([[1],[1,2],[1,2,3]]) == [1]", "assert Find_Min([[1,1],[1,1,1],[1,2,7,8]]) == [1,1]", "assert Find_Min([['x'],['x','y'],['x','y','z']]) == ['x']"], "challenge_test_list": []}
{"text": "Write a function to find the area of a rectangle.", "code": "def rectangle_area(l,b):\r\n  area=l*b\r\n  return area", "task_id": 458, "test_setup_code": "", "test_list": ["assert rectangle_area(10,20)==200", "assert rectangle_area(10,5)==50", "assert rectangle_area(4,2)==8"], "challenge_test_list": []}
{"text": "Write a function to remove uppercase substrings from a given string by using regex.", "code": "import re\r\ndef remove_uppercase(str1):\r\n  remove_upper = lambda text: re.sub('[A-Z]', '', text)\r\n  result =  remove_upper(str1)\r\n  return (result)", "task_id": 459, "test_setup_code": "", "test_list": ["assert remove_uppercase('cAstyoUrFavoRitETVshoWs') == 'cstyoravoitshos'", "assert remove_uppercase('wAtchTheinTernEtrAdIo') == 'wtchheinerntrdo'", "assert remove_uppercase('VoicESeaRchAndreComMendaTionS') == 'oiceachndreomendaion'"], "challenge_test_list": []}
{"text": "Write a python function to get the first element of each sublist.", "code": "def Extract(lst): \r\n    return [item[0] for item in lst] ", "task_id": 460, "test_setup_code": "", "test_list": ["assert Extract([[1, 2], [3, 4, 5], [6, 7, 8, 9]]) == [1, 3, 6]", "assert Extract([[1,2,3],[4, 5]]) == [1,4]", "assert Extract([[9,8,1],[1,2]]) == [9,1]"], "challenge_test_list": []}
{"text": "Write a python function to count the upper case characters in a given string.", "code": "def upper_ctr(str):\r\n    upper_ctr = 0\r\n    for i in range(len(str)):\r\n          if str[i] >= 'A' and str[i] <= 'Z': upper_ctr += 1\r\n          return upper_ctr", "task_id": 461, "test_setup_code": "", "test_list": ["assert upper_ctr('PYthon') == 1", "assert upper_ctr('BigData') == 1", "assert upper_ctr('program') == 0"], "challenge_test_list": []}
{"text": "Write a function to find all possible combinations of the elements of a given list.", "code": "def combinations_list(list1):\r\n    if len(list1) == 0:\r\n        return [[]]\r\n    result = []\r\n    for el in combinations_list(list1[1:]):\r\n        result += [el, el+[list1[0]]]\r\n    return result", "task_id": 462, "test_setup_code": "", "test_list": ["assert combinations_list(['orange', 'red', 'green', 'blue'])==[[], ['orange'], ['red'], ['red', 'orange'], ['green'], ['green', 'orange'], ['green', 'red'], ['green', 'red', 'orange'], ['blue'], ['blue', 'orange'], ['blue', 'red'], ['blue', 'red', 'orange'], ['blue', 'green'], ['blue', 'green', 'orange'], ['blue', 'green', 'red'], ['blue', 'green', 'red', 'orange']]", "assert combinations_list(['red', 'green', 'blue', 'white', 'black', 'orange'])==[[], ['red'], ['green'], ['green', 'red'], ['blue'], ['blue', 'red'], ['blue', 'green'], ['blue', 'green', 'red'], ['white'], ['white', 'red'], ['white', 'green'], ['white', 'green', 'red'], ['white', 'blue'], ['white', 'blue', 'red'], ['white', 'blue', 'green'], ['white', 'blue', 'green', 'red'], ['black'], ['black', 'red'], ['black', 'green'], ['black', 'green', 'red'], ['black', 'blue'], ['black', 'blue', 'red'], ['black', 'blue', 'green'], ['black', 'blue', 'green', 'red'], ['black', 'white'], ['black', 'white', 'red'], ['black', 'white', 'green'], ['black', 'white', 'green', 'red'], ['black', 'white', 'blue'], ['black', 'white', 'blue', 'red'], ['black', 'white', 'blue', 'green'], ['black', 'white', 'blue', 'green', 'red'], ['orange'], ['orange', 'red'], ['orange', 'green'], ['orange', 'green', 'red'], ['orange', 'blue'], ['orange', 'blue', 'red'], ['orange', 'blue', 'green'], ['orange', 'blue', 'green', 'red'], ['orange', 'white'], ['orange', 'white', 'red'], ['orange', 'white', 'green'], ['orange', 'white', 'green', 'red'], ['orange', 'white', 'blue'], ['orange', 'white', 'blue', 'red'], ['orange', 'white', 'blue', 'green'], ['orange', 'white', 'blue', 'green', 'red'], ['orange', 'black'], ['orange', 'black', 'red'], ['orange', 'black', 'green'], ['orange', 'black', 'green', 'red'], ['orange', 'black', 'blue'], ['orange', 'black', 'blue', 'red'], ['orange', 'black', 'blue', 'green'], ['orange', 'black', 'blue', 'green', 'red'], ['orange', 'black', 'white'], ['orange', 'black', 'white', 'red'], ['orange', 'black', 'white', 'green'], ['orange', 'black', 'white', 'green', 'red'], ['orange', 'black', 'white', 'blue'], ['orange', 'black', 'white', 'blue', 'red'], ['orange', 'black', 'white', 'blue', 'green'], ['orange', 'black', 'white', 'blue', 'green', 'red']]", "assert combinations_list(['red', 'green', 'black', 'orange'])==[[], ['red'], ['green'], ['green', 'red'], ['black'], ['black', 'red'], ['black', 'green'], ['black', 'green', 'red'], ['orange'], ['orange', 'red'], ['orange', 'green'], ['orange', 'green', 'red'], ['orange', 'black'], ['orange', 'black', 'red'], ['orange', 'black', 'green'], ['orange', 'black', 'green', 'red']]"], "challenge_test_list": []}
{"text": "Write a function to find the maximum product subarray of the given array.", "code": "def max_subarray_product(arr):\r\n\tn = len(arr)\r\n\tmax_ending_here = 1\r\n\tmin_ending_here = 1\r\n\tmax_so_far = 0\r\n\tflag = 0\r\n\tfor i in range(0, n):\r\n\t\tif arr[i] > 0:\r\n\t\t\tmax_ending_here = max_ending_here * arr[i]\r\n\t\t\tmin_ending_here = min (min_ending_here * arr[i], 1)\r\n\t\t\tflag = 1\r\n\t\telif arr[i] == 0:\r\n\t\t\tmax_ending_here = 1\r\n\t\t\tmin_ending_here = 1\r\n\t\telse:\r\n\t\t\ttemp = max_ending_here\r\n\t\t\tmax_ending_here = max (min_ending_here * arr[i], 1)\r\n\t\t\tmin_ending_here = temp * arr[i]\r\n\t\tif (max_so_far < max_ending_here):\r\n\t\t\tmax_so_far = max_ending_here\r\n\tif flag == 0 and max_so_far == 0:\r\n\t\treturn 0\r\n\treturn max_so_far", "task_id": 463, "test_setup_code": "", "test_list": ["assert max_subarray_product([1, -2, -3, 0, 7, -8, -2]) == 112", "assert max_subarray_product([6, -3, -10, 0, 2]) == 180 ", "assert max_subarray_product([-2, -40, 0, -2, -3]) == 80"], "challenge_test_list": []}
{"text": "Write a function to check if all values are same in a dictionary.", "code": "def check_value(dict, n):\r\n    result = all(x == n for x in dict.values()) \r\n    return result", "task_id": 464, "test_setup_code": "", "test_list": ["assert check_value({'Cierra Vega': 12, 'Alden Cantrell': 12, 'Kierra Gentry': 12, 'Pierre Cox': 12},10)==False", "assert check_value({'Cierra Vega': 12, 'Alden Cantrell': 12, 'Kierra Gentry': 12, 'Pierre Cox': 12},12)==True", "assert check_value({'Cierra Vega': 12, 'Alden Cantrell': 12, 'Kierra Gentry': 12, 'Pierre Cox': 12},5)==False"], "challenge_test_list": []}
{"text": "Write a function to drop empty items from a given dictionary.", "code": "def drop_empty(dict1):\r\n  dict1 = {key:value for (key, value) in dict1.items() if value is not None}\r\n  return dict1", "task_id": 465, "test_setup_code": "", "test_list": ["assert drop_empty({'c1': 'Red', 'c2': 'Green', 'c3':None})=={'c1': 'Red', 'c2': 'Green'}", "assert drop_empty({'c1': 'Red', 'c2': None, 'c3':None})=={'c1': 'Red'}", "assert drop_empty({'c1': None, 'c2': 'Green', 'c3':None})=={ 'c2': 'Green'}"], "challenge_test_list": []}
{"text": "Write a function to find the peak element in the given array.", "code": "def find_peak_util(arr, low, high, n): \r\n\tmid = low + (high - low)/2\r\n\tmid = int(mid) \r\n\tif ((mid == 0 or arr[mid - 1] <= arr[mid]) and\r\n\t\t(mid == n - 1 or arr[mid + 1] <= arr[mid])): \r\n\t\treturn mid \r\n\telif (mid > 0 and arr[mid - 1] > arr[mid]): \r\n\t\treturn find_peak_util(arr, low, (mid - 1), n) \r\n\telse: \r\n\t\treturn find_peak_util(arr, (mid + 1), high, n) \r\ndef find_peak(arr, n): \r\n\treturn find_peak_util(arr, 0, n - 1, n) ", "task_id": 466, "test_setup_code": "", "test_list": ["assert find_peak([1, 3, 20, 4, 1, 0], 6) == 2", "assert find_peak([2, 3, 4, 5, 6], 5) == 4", "assert find_peak([8, 9, 11, 12, 14, 15], 6) == 5 "], "challenge_test_list": []}
{"text": "Write a python function to convert decimal number to octal number.", "code": "def decimal_to_Octal(deciNum):\r\n    octalNum = 0\r\n    countval = 1;\r\n    dNo = deciNum;\r\n    while (deciNum!= 0):\r\n        remainder= deciNum % 8;\r\n        octalNum+= remainder*countval;\r\n        countval= countval*10;\r\n        deciNum //= 8; \r\n    return (octalNum)", "task_id": 467, "test_setup_code": "", "test_list": ["assert decimal_to_Octal(10) == 12", "assert decimal_to_Octal(2) == 2", "assert decimal_to_Octal(33) == 41"], "challenge_test_list": []}
{"text": "Write a function to find the maximum product formed by multiplying numbers of an increasing subsequence of that array.", "code": "def max_product(arr, n ): \r\n\tmpis =[0] * (n) \r\n\tfor i in range(n): \r\n\t\tmpis[i] = arr[i] \r\n\tfor i in range(1, n): \r\n\t\tfor j in range(i): \r\n\t\t\tif (arr[i] > arr[j] and\r\n\t\t\t\t\tmpis[i] < (mpis[j] * arr[i])): \r\n\t\t\t\t\t\tmpis[i] = mpis[j] * arr[i] \r\n\treturn max(mpis)", "task_id": 468, "test_setup_code": "", "test_list": ["assert max_product([3, 100, 4, 5, 150, 6], 6) == 45000 ", "assert max_product([4, 42, 55, 68, 80], 5) == 50265600", "assert max_product([10, 22, 9, 33, 21, 50, 41, 60], 8) == 21780000 "], "challenge_test_list": []}
{"text": "Write a function to find the maximum profit earned from a maximum of k stock transactions", "code": "def max_profit(price, k):\r\n    n = len(price)\r\n    final_profit = [[None for x in range(n)] for y in range(k + 1)]\r\n    for i in range(k + 1):\r\n        for j in range(n):\r\n            if i == 0 or j == 0:\r\n                final_profit[i][j] = 0\r\n            else:\r\n                max_so_far = 0\r\n                for x in range(j):\r\n                    curr_price = price[j] - price[x] + final_profit[i-1][x]\r\n                    if max_so_far < curr_price:\r\n                        max_so_far = curr_price\r\n                final_profit[i][j] = max(final_profit[i][j-1], max_so_far)\r\n    return final_profit[k][n-1]", "task_id": 469, "test_setup_code": "", "test_list": ["assert max_profit([1, 5, 2, 3, 7, 6, 4, 5], 3) == 10", "assert max_profit([2, 4, 7, 5, 4, 3, 5], 2) == 7", "assert max_profit([10, 6, 8, 4, 2], 2) == 2"], "challenge_test_list": []}
{"text": "Write a function to find the pairwise addition of the elements of the given tuples.", "code": "def add_pairwise(test_tup):\r\n  res = tuple(i + j for i, j in zip(test_tup, test_tup[1:]))\r\n  return (res) ", "task_id": 470, "test_setup_code": "", "test_list": ["assert add_pairwise((1, 5, 7, 8, 10)) == (6, 12, 15, 18)", "assert add_pairwise((2, 6, 8, 9, 11)) == (8, 14, 17, 20)", "assert add_pairwise((3, 7, 9, 10, 12)) == (10, 16, 19, 22)"], "challenge_test_list": []}
{"text": "Write a python function to find remainder of array multiplication divided by n.", "code": "def find_remainder(arr, lens, n): \r\n    mul = 1\r\n    for i in range(lens):  \r\n        mul = (mul * (arr[i] % n)) % n \r\n    return mul % n ", "task_id": 471, "test_setup_code": "", "test_list": ["assert find_remainder([ 100, 10, 5, 25, 35, 14 ],6,11) ==9", "assert find_remainder([1,1,1],3,1) == 0", "assert find_remainder([1,2,1],3,2) == 0"], "challenge_test_list": []}
{"text": "Write a python function to check whether the given list contains consecutive numbers or not.", "code": "def check_Consecutive(l): \r\n    return sorted(l) == list(range(min(l),max(l)+1)) ", "task_id": 472, "test_setup_code": "", "test_list": ["assert check_Consecutive([1,2,3,4,5]) == True", "assert check_Consecutive([1,2,3,5,6]) == False", "assert check_Consecutive([1,2,1]) == False"], "challenge_test_list": []}
{"text": "Write a function to find the tuple intersection of elements in the given tuple list irrespective of their order.", "code": "def tuple_intersection(test_list1, test_list2):\r\n  res = set([tuple(sorted(ele)) for ele in test_list1]) & set([tuple(sorted(ele)) for ele in test_list2])\r\n  return (res)", "task_id": 473, "test_setup_code": "", "test_list": ["assert tuple_intersection([(3, 4), (5, 6), (9, 10), (4, 5)] , [(5, 4), (3, 4), (6, 5), (9, 11)]) == {(4, 5), (3, 4), (5, 6)}", "assert tuple_intersection([(4, 1), (7, 4), (11, 13), (17, 14)] , [(1, 4), (7, 4), (16, 12), (10, 13)]) == {(4, 7), (1, 4)}", "assert tuple_intersection([(2, 1), (3, 2), (1, 3), (1, 4)] , [(11, 2), (2, 3), (6, 2), (1, 3)]) == {(1, 3), (2, 3)}"], "challenge_test_list": []}
{"text": "Write a function to replace characters in a string.", "code": "def replace_char(str1,ch,newch):\r\n str2 = str1.replace(ch, newch)\r\n return str2", "task_id": 474, "test_setup_code": "", "test_list": ["assert replace_char(\"polygon\",'y','l')==(\"pollgon\")", "assert replace_char(\"character\",'c','a')==(\"aharaater\")", "assert replace_char(\"python\",'l','a')==(\"python\")"], "challenge_test_list": []}
{"text": "Write a function to sort counter by value.", "code": "from collections import Counter\r\ndef sort_counter(dict1):\r\n x = Counter(dict1)\r\n sort_counter=x.most_common()\r\n return sort_counter", "task_id": 475, "test_setup_code": "", "test_list": ["assert sort_counter({'Math':81, 'Physics':83, 'Chemistry':87})==[('Chemistry', 87), ('Physics', 83), ('Math', 81)]", "assert sort_counter({'Math':400, 'Physics':300, 'Chemistry':250})==[('Math', 400), ('Physics', 300), ('Chemistry', 250)]", "assert sort_counter({'Math':900, 'Physics':1000, 'Chemistry':1250})==[('Chemistry', 1250), ('Physics', 1000), ('Math', 900)]"], "challenge_test_list": []}
{"text": "Write a python function to find the sum of the largest and smallest value in a given array.", "code": "def big_sum(nums):\r\n      sum= max(nums)+min(nums)\r\n      return sum", "task_id": 476, "test_setup_code": "", "test_list": ["assert big_sum([1,2,3]) == 4", "assert big_sum([-1,2,3,4]) == 3", "assert big_sum([2,3,6]) == 8"], "challenge_test_list": []}
{"text": "Write a python function to convert the given string to lower case.", "code": "def is_lower(string):\r\n  return (string.lower())", "task_id": 477, "test_setup_code": "", "test_list": ["assert is_lower(\"InValid\") == \"invalid\"", "assert is_lower(\"TruE\") == \"true\"", "assert is_lower(\"SenTenCE\") == \"sentence\""], "challenge_test_list": []}
{"text": "Write a function to remove lowercase substrings from a given string.", "code": "import re\r\ndef remove_lowercase(str1):\r\n remove_lower = lambda text: re.sub('[a-z]', '', text)\r\n result =  remove_lower(str1)\r\n return result", "task_id": 478, "test_setup_code": "", "test_list": ["assert remove_lowercase(\"PYTHon\")==('PYTH')", "assert remove_lowercase(\"FInD\")==('FID')", "assert remove_lowercase(\"STRinG\")==('STRG')"], "challenge_test_list": []}
{"text": "Write a python function to find the first digit of a given number.", "code": "def first_Digit(n) :  \r\n    while n >= 10:  \r\n        n = n / 10; \r\n    return int(n) ", "task_id": 479, "test_setup_code": "", "test_list": ["assert first_Digit(123) == 1", "assert first_Digit(456) == 4", "assert first_Digit(12) == 1"], "challenge_test_list": []}
{"text": "Write a python function to find the maximum occurring character in a given string.", "code": "def get_max_occuring_char(str1):\r\n  ASCII_SIZE = 256\r\n  ctr = [0] * ASCII_SIZE\r\n  max = -1\r\n  ch = ''\r\n  for i in str1:\r\n    ctr[ord(i)]+=1;\r\n  for i in str1:\r\n    if max < ctr[ord(i)]:\r\n      max = ctr[ord(i)]\r\n      ch = i\r\n  return ch", "task_id": 480, "test_setup_code": "", "test_list": ["assert get_max_occuring_char(\"data\") == \"a\"", "assert get_max_occuring_char(\"create\") == \"e\"", "assert get_max_occuring_char(\"brilliant girl\") == \"i\""], "challenge_test_list": []}
{"text": "Write a function to determine if there is a subset of the given set with sum equal to the given sum.", "code": "def is_subset_sum(set, n, sum):\r\n\tif (sum == 0):\r\n\t\treturn True\r\n\tif (n == 0):\r\n\t\treturn False\r\n\tif (set[n - 1] > sum):\r\n\t\treturn is_subset_sum(set, n - 1, sum)\r\n\treturn is_subset_sum(set, n-1, sum) or is_subset_sum(set, n-1, sum-set[n-1])", "task_id": 481, "test_setup_code": "", "test_list": ["assert is_subset_sum([3, 34, 4, 12, 5, 2], 6, 9) == True", "assert is_subset_sum([3, 34, 4, 12, 5, 2], 6, 30) == False", "assert is_subset_sum([3, 34, 4, 12, 5, 2], 6, 15) == True"], "challenge_test_list": []}
{"text": "Write a function to find sequences of one upper case letter followed by lower case letters in the given string by using regex.", "code": "import re \r\ndef match(text): \r\n\t\tpattern = '[A-Z]+[a-z]+$'\r\n\t\tif re.search(pattern, text): \r\n\t\t\t\treturn('Yes') \r\n\t\telse: \r\n\t\t\t\treturn('No') ", "task_id": 482, "test_setup_code": "", "test_list": ["assert match(\"Geeks\") == 'Yes'", "assert match(\"geeksforGeeks\") == 'Yes'", "assert match(\"geeks\") == 'No'"], "challenge_test_list": []}
{"text": "Write a python function to find the first natural number whose factorial is divisible by x.", "code": "def first_Factorial_Divisible_Number(x): \r\n    i = 1;\r\n    fact = 1; \r\n    for i in range(1,x): \r\n        fact = fact * i \r\n        if (fact % x == 0): \r\n            break\r\n    return i ", "task_id": 483, "test_setup_code": "", "test_list": ["assert first_Factorial_Divisible_Number(10) == 5", "assert first_Factorial_Divisible_Number(15) == 5", "assert first_Factorial_Divisible_Number(5) == 4"], "challenge_test_list": []}
{"text": "Write a function to remove the matching tuples from the given two tuples.", "code": "def remove_matching_tuple(test_list1, test_list2):\r\n  res = [sub for sub in test_list1 if sub not in test_list2]\r\n  return (res) ", "task_id": 484, "test_setup_code": "", "test_list": ["assert remove_matching_tuple([('Hello', 'dude'), ('How', 'are'), ('you', '?')], [('Hello', 'dude'), ('How', 'are')]) == [('you', '?')]", "assert remove_matching_tuple([('Part', 'of'), ('the', 'journey'), ('is ', 'end')], [('Journey', 'the'), ('is', 'end')]) == [('Part', 'of'), ('the', 'journey'), ('is ', 'end')]", "assert remove_matching_tuple([('Its', 'been'), ('a', 'long'), ('day', 'without')], [('a', 'long'), ('my', 'friend')]) == [('Its', 'been'), ('day', 'without')]"], "challenge_test_list": []}
{"text": "Write a function to find the largest palindromic number in the given array.", "code": "def is_palindrome(n) : \r\n\tdivisor = 1\r\n\twhile (n / divisor >= 10) : \r\n\t\tdivisor *= 10\r\n\twhile (n != 0) : \r\n\t\tleading = n // divisor \r\n\t\ttrailing = n % 10\r\n\t\tif (leading != trailing) : \r\n\t\t\treturn False\r\n\t\tn = (n % divisor) // 10\r\n\t\tdivisor = divisor // 100\r\n\treturn True\r\ndef largest_palindrome(A, n) : \r\n\tA.sort() \r\n\tfor i in range(n - 1, -1, -1) : \r\n\t\tif (is_palindrome(A[i])) : \r\n\t\t\treturn A[i] \r\n\treturn -1", "task_id": 485, "test_setup_code": "", "test_list": ["assert largest_palindrome([1, 232, 54545, 999991], 4) == 54545", "assert largest_palindrome([1, 2, 3, 4, 5, 50], 6) == 5", "assert largest_palindrome([1, 3, 7, 9, 45], 5)  == 9"], "challenge_test_list": []}
{"text": "Write a function to compute binomial probability for the given number.", "code": "def nCr(n, r): \r\n\tif (r > n / 2): \r\n\t\tr = n - r \r\n\tanswer = 1 \r\n\tfor i in range(1, r + 1): \r\n\t\tanswer *= (n - r + i) \r\n\t\tanswer /= i \r\n\treturn answer \r\ndef binomial_probability(n, k, p): \r\n\treturn (nCr(n, k) * pow(p, k) *\tpow(1 - p, n - k)) ", "task_id": 486, "test_setup_code": "", "test_list": ["assert binomial_probability(10, 5, 1.0/3) == 0.13656454808718185", "assert binomial_probability(11, 6, 2.0/4) == 0.2255859375", "assert binomial_probability(12, 7, 3.0/5) == 0.227030335488"], "challenge_test_list": []}
{"text": "Write a function to sort a list of tuples in increasing order by the last element in each tuple.", "code": "def sort_tuple(tup): \r\n\tlst = len(tup) \r\n\tfor i in range(0, lst): \r\n\t\tfor j in range(0, lst-i-1): \r\n\t\t\tif (tup[j][-1] > tup[j + 1][-1]): \r\n\t\t\t\ttemp = tup[j] \r\n\t\t\t\ttup[j]= tup[j + 1] \r\n\t\t\t\ttup[j + 1]= temp \r\n\treturn tup", "task_id": 487, "test_setup_code": "", "test_list": ["assert sort_tuple([(1, 3), (3, 2), (2, 1)] ) == [(2, 1), (3, 2), (1, 3)]", "assert sort_tuple([(2, 4), (3, 3), (1, 1)] ) == [(1, 1), (3, 3), (2, 4)]", "assert sort_tuple([(3, 9), (6, 7), (4, 3)] ) == [(4, 3), (6, 7), (3, 9)]"], "challenge_test_list": []}
{"text": "Write a function to find the area of a pentagon.", "code": "import math\r\ndef area_pentagon(a):\r\n  area=(math.sqrt(5*(5+2*math.sqrt(5)))*pow(a,2))/4.0\r\n  return area", "task_id": 488, "test_setup_code": "", "test_list": ["assert area_pentagon(5)==43.01193501472417", "assert area_pentagon(10)==172.0477400588967", "assert area_pentagon(15)==387.10741513251753"], "challenge_test_list": []}
{"text": "Write a python function to find the frequency of the largest value in a given array.", "code": "def frequency_Of_Largest(n,arr): \r\n    mn = arr[0] \r\n    freq = 1\r\n    for i in range(1,n): \r\n        if (arr[i] >mn): \r\n            mn = arr[i] \r\n            freq = 1\r\n        elif (arr[i] == mn): \r\n            freq += 1\r\n    return freq ", "task_id": 489, "test_setup_code": "", "test_list": ["assert frequency_Of_Largest(5,[1,2,3,4,4]) == 2", "assert frequency_Of_Largest(3,[5,6,5]) == 1", "assert frequency_Of_Largest(4,[2,7,7,7]) == 3"], "challenge_test_list": []}
{"text": "Write a function to extract all the pairs which are symmetric in the given tuple list.", "code": "def extract_symmetric(test_list):\r\n  temp = set(test_list) & {(b, a) for a, b in test_list}\r\n  res = {(a, b) for a, b in temp if a < b}\r\n  return (res) ", "task_id": 490, "test_setup_code": "", "test_list": ["assert extract_symmetric([(6, 7), (2, 3), (7, 6), (9, 8), (10, 2), (8, 9)] ) == {(8, 9), (6, 7)}", "assert extract_symmetric([(7, 8), (3, 4), (8, 7), (10, 9), (11, 3), (9, 10)] ) == {(9, 10), (7, 8)}", "assert extract_symmetric([(8, 9), (4, 5), (9, 8), (11, 10), (12, 4), (10, 11)] ) == {(8, 9), (10, 11)}"], "challenge_test_list": []}
{"text": "Write a function to find the sum of geometric progression series.", "code": "import math\r\ndef sum_gp(a,n,r):\r\n total = (a * (1 - math.pow(r, n ))) / (1- r)\r\n return total", "task_id": 491, "test_setup_code": "", "test_list": ["assert sum_gp(1,5,2)==31", "assert sum_gp(1,5,4)==341", "assert sum_gp(2,6,3)==728"], "challenge_test_list": []}
{"text": "Write a function to search an element in the given array by using binary search.", "code": "def binary_search(item_list,item):\r\n\tfirst = 0\r\n\tlast = len(item_list)-1\r\n\tfound = False\r\n\twhile( first<=last and not found):\r\n\t\tmid = (first + last)//2\r\n\t\tif item_list[mid] == item :\r\n\t\t\tfound = True\r\n\t\telse:\r\n\t\t\tif item < item_list[mid]:\r\n\t\t\t\tlast = mid - 1\r\n\t\t\telse:\r\n\t\t\t\tfirst = mid + 1\t\r\n\treturn found", "task_id": 492, "test_setup_code": "", "test_list": ["assert binary_search([1,2,3,5,8], 6) == False", "assert binary_search([7, 8, 9, 10, 13], 10) == True", "assert binary_search([11, 13, 14, 19, 22, 36], 23) == False"], "challenge_test_list": []}
{"text": "Write a function to calculate a grid of hexagon coordinates where function returns a list of lists containing 6 tuples of x, y point coordinates.", "code": "import math\r\ndef calculate_polygons(startx, starty, endx, endy, radius):\r\n    sl = (2 * radius) * math.tan(math.pi / 6)\r\n    p = sl * 0.5\r\n    b = sl * math.cos(math.radians(30))\r\n    w = b * 2\r\n    h = 2 * sl   \r\n    startx = startx - w\r\n    starty = starty - h\r\n    endx = endx + w\r\n    endy = endy + h\r\n    origx = startx\r\n    origy = starty\r\n    xoffset = b\r\n    yoffset = 3 * p\r\n    polygons = []\r\n    row = 1\r\n    counter = 0\r\n    while starty < endy:\r\n        if row % 2 == 0:\r\n            startx = origx + xoffset\r\n        else:\r\n            startx = origx\r\n        while startx < endx:\r\n            p1x = startx\r\n            p1y = starty + p\r\n            p2x = startx\r\n            p2y = starty + (3 * p)\r\n            p3x = startx + b\r\n            p3y = starty + h\r\n            p4x = startx + w\r\n            p4y = starty + (3 * p)\r\n            p5x = startx + w\r\n            p5y = starty + p\r\n            p6x = startx + b\r\n            p6y = starty\r\n            poly = [\r\n                (p1x, p1y),\r\n                (p2x, p2y),\r\n                (p3x, p3y),\r\n                (p4x, p4y),\r\n                (p5x, p5y),\r\n                (p6x, p6y),\r\n                (p1x, p1y)]\r\n            polygons.append(poly)\r\n            counter += 1\r\n            startx += w\r\n        starty += yoffset\r\n        row += 1\r\n    return polygons", "task_id": 493, "test_setup_code": "", "test_list": ["assert calculate_polygons(1,1, 4, 4, 3)==[[(-5.0, -4.196152422706632), (-5.0, -0.7320508075688767), (-2.0, 1.0), (1.0, -0.7320508075688767), (1.0, -4.196152422706632), (-2.0, -5.928203230275509), (-5.0, -4.196152422706632)], [(1.0, -4.196152422706632), (1.0, -0.7320508075688767), (4.0, 1.0), (7.0, -0.7320508075688767), (7.0, -4.196152422706632), (4.0, -5.928203230275509), (1.0, -4.196152422706632)], [(7.0, -4.196152422706632), (7.0, -0.7320508075688767), (10.0, 1.0), (13.0, -0.7320508075688767), (13.0, -4.196152422706632), (10.0, -5.928203230275509), (7.0, -4.196152422706632)], [(-2.0, 1.0000000000000004), (-2.0, 4.464101615137755), (1.0, 6.196152422706632), (4.0, 4.464101615137755), (4.0, 1.0000000000000004), (1.0, -0.7320508075688767), (-2.0, 1.0000000000000004)], [(4.0, 1.0000000000000004), (4.0, 4.464101615137755), (7.0, 6.196152422706632), (10.0, 4.464101615137755), (10.0, 1.0000000000000004), (7.0, -0.7320508075688767), (4.0, 1.0000000000000004)], [(-5.0, 6.196152422706632), (-5.0, 9.660254037844387), (-2.0, 11.392304845413264), (1.0, 9.660254037844387), (1.0, 6.196152422706632), (-2.0, 4.464101615137755), (-5.0, 6.196152422706632)], [(1.0, 6.196152422706632), (1.0, 9.660254037844387), (4.0, 11.392304845413264), (7.0, 9.660254037844387), (7.0, 6.196152422706632), (4.0, 4.464101615137755), (1.0, 6.196152422706632)], [(7.0, 6.196152422706632), (7.0, 9.660254037844387), (10.0, 11.392304845413264), (13.0, 9.660254037844387), (13.0, 6.196152422706632), (10.0, 4.464101615137755), (7.0, 6.196152422706632)], [(-2.0, 11.392304845413264), (-2.0, 14.85640646055102), (1.0, 16.588457268119896), (4.0, 14.85640646055102), (4.0, 11.392304845413264), (1.0, 9.660254037844387), (-2.0, 11.392304845413264)], [(4.0, 11.392304845413264), (4.0, 14.85640646055102), (7.0, 16.588457268119896), (10.0, 14.85640646055102), (10.0, 11.392304845413264), (7.0, 9.660254037844387), (4.0, 11.392304845413264)]]", "assert calculate_polygons(5,4,7,9,8)==[[(-11.0, -9.856406460551018), (-11.0, -0.6188021535170058), (-3.0, 4.0), (5.0, -0.6188021535170058), (5.0, -9.856406460551018), (-3.0, -14.475208614068023), (-11.0, -9.856406460551018)], [(5.0, -9.856406460551018), (5.0, -0.6188021535170058), (13.0, 4.0), (21.0, -0.6188021535170058), (21.0, -9.856406460551018), (13.0, -14.475208614068023), (5.0, -9.856406460551018)], [(21.0, -9.856406460551018), (21.0, -0.6188021535170058), (29.0, 4.0), (37.0, -0.6188021535170058), (37.0, -9.856406460551018), (29.0, -14.475208614068023), (21.0, -9.856406460551018)], [(-3.0, 4.0), (-3.0, 13.237604307034012), (5.0, 17.856406460551018), (13.0, 13.237604307034012), (13.0, 4.0), (5.0, -0.6188021535170058), (-3.0, 4.0)], [(13.0, 4.0), (13.0, 13.237604307034012), (21.0, 17.856406460551018), (29.0, 13.237604307034012), (29.0, 4.0), (21.0, -0.6188021535170058), (13.0, 4.0)], [(-11.0, 17.856406460551018), (-11.0, 27.09401076758503), (-3.0, 31.712812921102035), (5.0, 27.09401076758503), (5.0, 17.856406460551018), (-3.0, 13.237604307034012), (-11.0, 17.856406460551018)], [(5.0, 17.856406460551018), (5.0, 27.09401076758503), (13.0, 31.712812921102035), (21.0, 27.09401076758503), (21.0, 17.856406460551018), (13.0, 13.237604307034012), (5.0, 17.856406460551018)], [(21.0, 17.856406460551018), (21.0, 27.09401076758503), (29.0, 31.712812921102035), (37.0, 27.09401076758503), (37.0, 17.856406460551018), (29.0, 13.237604307034012), (21.0, 17.856406460551018)], [(-3.0, 31.712812921102035), (-3.0, 40.95041722813605), (5.0, 45.569219381653056), (13.0, 40.95041722813605), (13.0, 31.712812921102035), (5.0, 27.09401076758503), (-3.0, 31.712812921102035)], [(13.0, 31.712812921102035), (13.0, 40.95041722813605), (21.0, 45.569219381653056), (29.0, 40.95041722813605), (29.0, 31.712812921102035), (21.0, 27.09401076758503), (13.0, 31.712812921102035)]]", "assert calculate_polygons(9,6,4,3,2)==[[(5.0, 2.5358983848622456), (5.0, 4.8452994616207485), (7.0, 6.0), (9.0, 4.8452994616207485), (9.0, 2.5358983848622456), (7.0, 1.3811978464829942), (5.0, 2.5358983848622456)], [(7.0, 6.0), (7.0, 8.309401076758503), (9.0, 9.464101615137753), (11.0, 8.309401076758503), (11.0, 6.0), (9.0, 4.8452994616207485), (7.0, 6.0)]]"], "challenge_test_list": []}
{"text": "Write a function to convert the given binary tuple to integer.", "code": "def binary_to_integer(test_tup):\r\n  res = int(\"\".join(str(ele) for ele in test_tup), 2)\r\n  return (str(res)) ", "task_id": 494, "test_setup_code": "", "test_list": ["assert binary_to_integer((1, 1, 0, 1, 0, 0, 1)) == '105'", "assert binary_to_integer((0, 1, 1, 0, 0, 1, 0, 1)) == '101'", "assert binary_to_integer((1, 1, 0, 1, 0, 1)) == '53'"], "challenge_test_list": []}
{"text": "Write a function to remove lowercase substrings from a given string by using regex.", "code": "import re\r\ndef remove_lowercase(str1):\r\n  remove_lower = lambda text: re.sub('[a-z]', '', text)\r\n  result =  remove_lower(str1)\r\n  return (result)", "task_id": 495, "test_setup_code": "", "test_list": ["assert remove_lowercase('KDeoALOklOOHserfLoAJSIskdsf') == 'KDALOOOHLAJSI'", "assert remove_lowercase('ProducTnamEstreAmIngMediAplAYer') == 'PTEAIMAAY'", "assert remove_lowercase('maNufacTuredbYSheZenTechNolOGIes') == 'NTYSZTNOGI'"], "challenge_test_list": []}
{"text": "Write a function to find the smallest integers from a given list of numbers using heap queue algorithm.", "code": "import heapq as hq\r\ndef heap_queue_smallest(nums,n):\r\n  smallest_nums = hq.nsmallest(n, nums)\r\n  return smallest_nums", "task_id": 496, "test_setup_code": "", "test_list": ["assert heap_queue_smallest( [25, 35, 22, 85, 14, 65, 75, 25, 58],3)==[14, 22, 25] ", "assert heap_queue_smallest( [25, 35, 22, 85, 14, 65, 75, 25, 58],2)==[14, 22]", "assert heap_queue_smallest( [25, 35, 22, 85, 14, 65, 75, 22, 58],5)==[14, 22, 22, 25, 35]"], "challenge_test_list": []}
{"text": "Write a function to find the surface area of a cone.", "code": "import math\r\ndef surfacearea_cone(r,h):\r\n  l = math.sqrt(r * r + h * h)\r\n  SA = math.pi * r * (r + l)\r\n  return SA", "task_id": 497, "test_setup_code": "", "test_list": ["assert surfacearea_cone(5,12)==282.7433388230814", "assert surfacearea_cone(10,15)==880.5179353159282", "assert surfacearea_cone(19,17)==2655.923961165254"], "challenge_test_list": []}
{"text": "Write a python function to find gcd of two positive integers.", "code": "def gcd(x, y):\r\n    gcd = 1\r\n    if x % y == 0:\r\n        return y\r\n    for k in range(int(y / 2), 0, -1):\r\n        if x % k == 0 and y % k == 0:\r\n            gcd = k\r\n            break  \r\n    return gcd", "task_id": 498, "test_setup_code": "", "test_list": ["assert gcd(12, 17) == 1", "assert gcd(4,6) == 2", "assert gcd(2,9) == 1"], "challenge_test_list": []}
{"text": "Write a function to find the diameter of a circle.", "code": "def diameter_circle(r):\r\n  diameter=2*r\r\n  return diameter", "task_id": 499, "test_setup_code": "", "test_list": ["assert diameter_circle(10)==20", "assert diameter_circle(40)==80", "assert diameter_circle(15)==30"], "challenge_test_list": []}
{"text": "Write a function to concatenate all elements of the given list into a string.", "code": "def concatenate_elements(list):\r\n  ans = ' '\r\n  for i in list:\r\n    ans = ans+ ' '+i\r\n  return (ans) ", "task_id": 500, "test_setup_code": "", "test_list": ["assert concatenate_elements(['hello','there','have','a','rocky','day'] ) == '  hello there have a rocky day'", "assert concatenate_elements([ 'Hi', 'there', 'How','are', 'you'] ) == '  Hi there How are you'", "assert concatenate_elements([ 'Part', 'of', 'the','journey', 'is', 'end'] ) == '  Part of the journey is end'"], "challenge_test_list": []}
{"text": "Write a python function to find common divisor between two numbers in a given pair.", "code": "def ngcd(x,y):\r\n    i=1\r\n    while(i<=x and i<=y):\r\n        if(x%i==0 and y%i == 0):\r\n            gcd=i;\r\n        i+=1\r\n    return gcd;\r\ndef num_comm_div(x,y):\r\n  n = ngcd(x,y)\r\n  result = 0\r\n  z = int(n**0.5)\r\n  i = 1\r\n  while(i <= z):\r\n    if(n % i == 0):\r\n      result += 2 \r\n      if(i == n/i):\r\n        result-=1\r\n    i+=1\r\n  return result", "task_id": 501, "test_setup_code": "", "test_list": ["assert num_comm_div(2,4) == 2", "assert num_comm_div(2,8) == 2", "assert num_comm_div(12,24) == 6"], "challenge_test_list": []}
{"text": "Write a python function to find remainder of two numbers.", "code": "def find(n,m):\r\n  r = n%m\r\n  return (r)", "task_id": 502, "test_setup_code": "", "test_list": ["assert find(3,3) == 0", "assert find(10,3) == 1", "assert find(16,5) == 1"], "challenge_test_list": []}
{"text": "Write a function to add consecutive numbers of a given list.", "code": "def add_consecutive_nums(nums):\r\n    result = [b+a for a, b in zip(nums[:-1], nums[1:])]\r\n    return result", "task_id": 503, "test_setup_code": "", "test_list": ["assert add_consecutive_nums([1, 1, 3, 4, 4, 5, 6, 7])==[2, 4, 7, 8, 9, 11, 13]", "assert add_consecutive_nums([4, 5, 8, 9, 6, 10])==[9, 13, 17, 15, 16]", "assert add_consecutive_nums([1, 2, 3, 4, 5, 6, 7, 8, 9, 10])==[3, 5, 7, 9, 11, 13, 15, 17, 19]"], "challenge_test_list": []}
{"text": "Write a python function to find the cube sum of first n natural numbers.", "code": "def sum_Of_Series(n): \r\n    sum = 0\r\n    for i in range(1,n + 1): \r\n        sum += i * i*i       \r\n    return sum", "task_id": 504, "test_setup_code": "", "test_list": ["assert sum_Of_Series(5) == 225", "assert sum_Of_Series(2) == 9", "assert sum_Of_Series(3) == 36"], "challenge_test_list": []}
{"text": "Write a function to move all zeroes to the end of the given array.", "code": "def re_order(A):\r\n    k = 0\r\n    for i in A:\r\n        if i:\r\n            A[k] = i\r\n            k = k + 1\r\n    for i in range(k, len(A)):\r\n        A[i] = 0\r\n    return A", "task_id": 505, "test_setup_code": "", "test_list": ["assert re_order([6, 0, 8, 2, 3, 0, 4, 0, 1]) == [6, 8, 2, 3, 4, 1, 0, 0, 0]", "assert re_order([4, 0, 2, 7, 0, 9, 0, 12, 0]) == [4, 2, 7, 9, 12, 0, 0, 0, 0]", "assert re_order([3, 11, 0, 74, 14, 0, 1, 0, 2]) == [3, 11, 74, 14, 1, 2, 0, 0, 0]"], "challenge_test_list": []}
{"text": "Write a function to calculate the permutation coefficient of given p(n, k).", "code": "def permutation_coefficient(n, k): \r\n\tP = [[0 for i in range(k + 1)] \r\n\t\t\tfor j in range(n + 1)] \r\n\tfor i in range(n + 1): \r\n\t\tfor j in range(min(i, k) + 1): \r\n\t\t\tif (j == 0): \r\n\t\t\t\tP[i][j] = 1\r\n\t\t\telse: \r\n\t\t\t\tP[i][j] = P[i - 1][j] + ( \r\n\t\t\t\t\t\tj * P[i - 1][j - 1]) \r\n\t\t\tif (j < k): \r\n\t\t\t\tP[i][j + 1] = 0\r\n\treturn P[n][k] ", "task_id": 506, "test_setup_code": "", "test_list": ["assert permutation_coefficient(10, 2) == 90", "assert permutation_coefficient(10, 3) == 720", "assert permutation_coefficient(10, 1) == 10"], "challenge_test_list": []}
{"text": "Write a function to remove specific words from a given list.", "code": "def remove_words(list1, removewords):\r\n    for word in list(list1):\r\n        if word in removewords:\r\n            list1.remove(word)\r\n    return list1  ", "task_id": 507, "test_setup_code": "", "test_list": ["assert remove_words(['red', 'green', 'blue', 'white', 'black', 'orange'],['white', 'orange'])==['red', 'green', 'blue', 'black']", "assert remove_words(['red', 'green', 'blue', 'white', 'black', 'orange'],['black', 'orange'])==['red', 'green', 'blue', 'white']", "assert remove_words(['red', 'green', 'blue', 'white', 'black', 'orange'],['blue', 'white'])==['red', 'green', 'black', 'orange']"], "challenge_test_list": []}
{"text": "Write a function to check if the common elements between two given lists are in the same order or not.", "code": "def same_order(l1, l2):\r\n    common_elements = set(l1) & set(l2)\r\n    l1 = [e for e in l1 if e in common_elements]\r\n    l2 = [e for e in l2 if e in common_elements]\r\n    return l1 == l2", "task_id": 508, "test_setup_code": "", "test_list": ["assert same_order([\"red\",\"green\",\"black\",\"orange\"],[\"red\",\"pink\",\"green\",\"white\",\"black\"])==True", "assert same_order([\"red\",\"pink\",\"green\",\"white\",\"black\"],[\"white\",\"orange\",\"pink\",\"black\"])==False", "assert same_order([\"red\",\"green\",\"black\",\"orange\"],[\"red\",\"pink\",\"green\",\"white\",\"black\"])==True"], "challenge_test_list": []}
{"text": "Write a python function to find the average of odd numbers till a given odd number.", "code": "def average_Odd(n) : \r\n    if (n%2==0) : \r\n        return (\"Invalid Input\") \r\n        return -1 \r\n    sm =0\r\n    count =0\r\n    while (n>=1) : \r\n        count=count+1\r\n        sm = sm + n \r\n        n = n-2\r\n    return sm//count ", "task_id": 509, "test_setup_code": "", "test_list": ["assert average_Odd(9) == 5", "assert average_Odd(5) == 3", "assert average_Odd(11) == 6"], "challenge_test_list": []}
{"text": "Write a function to find the number of subsequences having product smaller than k for the given non negative array.", "code": "def no_of_subsequences(arr, k): \r\n\tn = len(arr) \r\n\tdp = [[0 for i in range(n + 1)] \r\n\t\t\tfor j in range(k + 1)] \r\n\tfor i in range(1, k + 1): \r\n\t\tfor j in range(1, n + 1): \r\n\t\t\tdp[i][j] = dp[i][j - 1] \r\n\t\t\tif arr[j - 1] <= i and arr[j - 1] > 0: \r\n\t\t\t\tdp[i][j] += dp[i // arr[j - 1]][j - 1] + 1\r\n\treturn dp[k][n]", "task_id": 510, "test_setup_code": "", "test_list": ["assert no_of_subsequences([1,2,3,4], 10) == 11", "assert no_of_subsequences([4,8,7,2], 50) == 9", "assert no_of_subsequences([5,6,7,8], 15) == 4"], "challenge_test_list": []}
{"text": "Write a python function to find minimum sum of factors of a given number.", "code": "def find_Min_Sum(num): \r\n    sum = 0\r\n    i = 2\r\n    while(i * i <= num): \r\n        while(num % i == 0): \r\n            sum += i \r\n            num /= i \r\n        i += 1\r\n    sum += num \r\n    return sum", "task_id": 511, "test_setup_code": "", "test_list": ["assert find_Min_Sum(12) == 7", "assert find_Min_Sum(105) == 15", "assert find_Min_Sum(2) == 2"], "challenge_test_list": []}
{"text": "Write a function to count the element frequency in the mixed nested tuple.", "code": "def flatten(test_tuple): \r\n\tfor tup in test_tuple: \r\n\t\tif isinstance(tup, tuple): \r\n\t\t\tyield from flatten(tup) \r\n\t\telse: \r\n\t\t\tyield tup \r\ndef count_element_freq(test_tuple):\r\n  res = {}\r\n  for ele in flatten(test_tuple):\r\n    if ele not in res:\r\n      res[ele] = 0\r\n    res[ele] += 1\r\n  return (res) ", "task_id": 512, "test_setup_code": "", "test_list": ["assert count_element_freq((5, 6, (5, 6), 7, (8, 9), 9) ) == {5: 2, 6: 2, 7: 1, 8: 1, 9: 2}", "assert count_element_freq((6, 7, (6, 7), 8, (9, 10), 10) ) == {6: 2, 7: 2, 8: 1, 9: 1, 10: 2}", "assert count_element_freq((7, 8, (7, 8), 9, (10, 11), 11) ) == {7: 2, 8: 2, 9: 1, 10: 1, 11: 2}"], "challenge_test_list": []}
{"text": "Write a function to convert tuple into list by adding the given string after every element.", "code": "def add_str(test_tup, K):\r\n  res = [ele for sub in test_tup for ele in (sub, K)]\r\n  return (res) ", "task_id": 513, "test_setup_code": "", "test_list": ["assert add_str((5, 6, 7, 4, 9) , \"FDF\") == [5, 'FDF', 6, 'FDF', 7, 'FDF', 4, 'FDF', 9, 'FDF']", "assert add_str((7, 8, 9, 10) , \"PF\") == [7, 'PF', 8, 'PF', 9, 'PF', 10, 'PF']", "assert add_str((11, 14, 12, 1, 4) , \"JH\") == [11, 'JH', 14, 'JH', 12, 'JH', 1, 'JH', 4, 'JH']"], "challenge_test_list": []}
{"text": "Write a function to find the summation of tuple elements in the given tuple list.", "code": "def sum_elements(test_tup):\r\n  res = sum(list(test_tup))\r\n  return (res) ", "task_id": 514, "test_setup_code": "", "test_list": ["assert sum_elements((7, 8, 9, 1, 10, 7)) == 42", "assert sum_elements((1, 2, 3, 4, 5, 6)) == 21", "assert sum_elements((11, 12 ,13 ,45, 14)) == 95"], "challenge_test_list": []}
{"text": "Write a function to check if there is a subset with sum divisible by m.", "code": "def modular_sum(arr, n, m): \r\n\tif (n > m): \r\n\t\treturn True\r\n\tDP = [False for i in range(m)] \r\n\tfor i in range(n): \r\n\t\tif (DP[0]): \r\n\t\t\treturn True\r\n\t\ttemp = [False for i in range(m)] \r\n\t\tfor j in range(m): \r\n\t\t\tif (DP[j] == True): \r\n\t\t\t\tif (DP[(j + arr[i]) % m] == False): \r\n\t\t\t\t\ttemp[(j + arr[i]) % m] = True\r\n\t\tfor j in range(m): \r\n\t\t\tif (temp[j]): \r\n\t\t\t\tDP[j] = True\r\n\t\tDP[arr[i] % m] = True\r\n\treturn DP[0]", "task_id": 515, "test_setup_code": "", "test_list": ["assert modular_sum([3, 1, 7, 5], 4, 6) == True", "assert modular_sum([1, 7], 2, 5) == False", "assert modular_sum([1, 6], 2, 5) == False"], "challenge_test_list": []}
{"text": "Write a function to sort a list of elements using radix sort.", "code": "def radix_sort(nums):\r\n    RADIX = 10\r\n    placement = 1\r\n    max_digit = max(nums)\r\n\r\n    while placement < max_digit:\r\n      buckets = [list() for _ in range( RADIX )]\r\n      for i in nums:\r\n        tmp = int((i / placement) % RADIX)\r\n        buckets[tmp].append(i)\r\n      a = 0\r\n      for b in range( RADIX ):\r\n        buck = buckets[b]\r\n        for i in buck:\r\n          nums[a] = i\r\n          a += 1\r\n      placement *= RADIX\r\n    return nums", "task_id": 516, "test_setup_code": "", "test_list": ["assert radix_sort([15, 79, 25, 68, 37]) == [15, 25, 37, 68, 79]", "assert radix_sort([9, 11, 8, 7, 3, 2]) == [2, 3, 7, 8, 9, 11]", "assert radix_sort([36, 12, 24, 26, 29]) == [12, 24, 26, 29, 36]"], "challenge_test_list": []}
{"text": "Write a python function to find the largest postive number from the given list.", "code": "def largest_pos(list1): \r\n    max = list1[0] \r\n    for x in list1: \r\n        if x > max : \r\n             max = x  \r\n    return max", "task_id": 517, "test_setup_code": "", "test_list": ["assert largest_pos([1,2,3,4,-1]) == 4", "assert largest_pos([0,1,2,-5,-1,6]) == 6", "assert largest_pos([0,0,1,0]) == 1"], "challenge_test_list": []}
{"text": "Write a function to find the square root of a perfect number.", "code": "import math\r\ndef sqrt_root(num):\r\n sqrt_root = math.pow(num, 0.5)\r\n return sqrt_root ", "task_id": 518, "test_setup_code": "", "test_list": ["assert sqrt_root(4)==2", "assert sqrt_root(16)==4", "assert sqrt_root(400)==20"], "challenge_test_list": []}
{"text": "Write a function to calculate volume of a tetrahedron.", "code": "import math\r\ndef volume_tetrahedron(num):\r\n\tvolume = (num ** 3 / (6 * math.sqrt(2)))\t\r\n\treturn round(volume, 2)", "task_id": 519, "test_setup_code": "", "test_list": ["assert volume_tetrahedron(10)==117.85", "assert volume_tetrahedron(15)==397.75", "assert volume_tetrahedron(20)==942.81"], "challenge_test_list": []}
{"text": "Write a function to find the lcm of the given array elements.", "code": "def find_lcm(num1, num2): \r\n\tif(num1>num2): \r\n\t\tnum = num1 \r\n\t\tden = num2 \r\n\telse: \r\n\t\tnum = num2 \r\n\t\tden = num1 \r\n\trem = num % den \r\n\twhile (rem != 0): \r\n\t\tnum = den \r\n\t\tden = rem \r\n\t\trem = num % den \r\n\tgcd = den \r\n\tlcm = int(int(num1 * num2)/int(gcd)) \r\n\treturn lcm \r\ndef get_lcm(l):\r\n  num1 = l[0]\r\n  num2 = l[1]\r\n  lcm = find_lcm(num1, num2)\r\n  for i in range(2, len(l)):\r\n    lcm = find_lcm(lcm, l[i])\r\n  return lcm ", "task_id": 520, "test_setup_code": "", "test_list": ["assert get_lcm([2, 7, 3, 9, 4]) == 252", "assert get_lcm([1, 2, 8, 3]) == 24", "assert get_lcm([3, 8, 4, 10, 5]) == 120"], "challenge_test_list": []}
{"text": "Write a function to print check if the triangle is scalene or not.", "code": "def check_isosceles(x,y,z):\r\n  if x!=y & y!=z & z!=x:\r\n\t   return True\r\n  else:\r\n     return False", "task_id": 521, "test_setup_code": "", "test_list": ["assert check_isosceles(6,8,12)==True", "assert check_isosceles(6,6,12)==False", "assert check_isosceles(6,15,20)==True"], "challenge_test_list": []}
{"text": "Write a function to find the longest bitonic subsequence for the given array.", "code": "def lbs(arr): \r\n\tn = len(arr) \r\n\tlis = [1 for i in range(n+1)] \r\n\tfor i in range(1 , n): \r\n\t\tfor j in range(0 , i): \r\n\t\t\tif ((arr[i] > arr[j]) and (lis[i] < lis[j] +1)): \r\n\t\t\t\tlis[i] = lis[j] + 1\r\n\tlds = [1 for i in range(n+1)] \r\n\tfor i in reversed(range(n-1)): \r\n\t\tfor j in reversed(range(i-1 ,n)): \r\n\t\t\tif(arr[i] > arr[j] and lds[i] < lds[j] + 1): \r\n\t\t\t\tlds[i] = lds[j] + 1\r\n\tmaximum = lis[0] + lds[0] - 1\r\n\tfor i in range(1 , n): \r\n\t\tmaximum = max((lis[i] + lds[i]-1), maximum) \r\n\treturn maximum", "task_id": 522, "test_setup_code": "", "test_list": ["assert lbs([0 , 8 , 4, 12, 2, 10 , 6 , 14 , 1 , 9 , 5 , 13, 3, 11 , 7 , 15]) == 7", "assert lbs([1, 11, 2, 10, 4, 5, 2, 1]) == 6", "assert lbs([80, 60, 30, 40, 20, 10]) == 5"], "challenge_test_list": []}
{"text": "Write a function to check whether a given string has a capital letter, a lower case letter, a number and specified length using lambda function.", "code": "def check_string(str1):\r\n    messg = [\r\n    lambda str1: any(x.isupper() for x in str1) or 'String must have 1 upper case character.',\r\n    lambda str1: any(x.islower() for x in str1) or 'String must have 1 lower case character.',\r\n    lambda str1: any(x.isdigit() for x in str1) or 'String must have 1 number.',\r\n    lambda str1: len(str1) >= 7                 or 'String length should be atleast 8.',]\r\n    result = [x for x in [i(str1) for i in messg] if x != True]\r\n    if not result:\r\n        result.append('Valid string.')\r\n    return result  ", "task_id": 523, "test_setup_code": "", "test_list": ["assert check_string('python')==['String must have 1 upper case character.', 'String must have 1 number.', 'String length should be atleast 8.']", "assert check_string('123python')==['String must have 1 upper case character.']", "assert check_string('123Python')==['Valid string.']"], "challenge_test_list": []}
{"text": "Write a function to find the sum of maximum increasing subsequence of the given array.", "code": "def max_sum_increasing_subsequence(arr, n): \r\n\tmax = 0\r\n\tmsis = [0 for x in range(n)] \r\n\tfor i in range(n): \r\n\t\tmsis[i] = arr[i] \r\n\tfor i in range(1, n): \r\n\t\tfor j in range(i): \r\n\t\t\tif (arr[i] > arr[j] and\r\n\t\t\t\tmsis[i] < msis[j] + arr[i]): \r\n\t\t\t\tmsis[i] = msis[j] + arr[i] \r\n\tfor i in range(n): \r\n\t\tif max < msis[i]: \r\n\t\t\tmax = msis[i] \r\n\treturn max", "task_id": 524, "test_setup_code": "", "test_list": ["assert max_sum_increasing_subsequence([1, 101, 2, 3, 100, 4, 5], 7) == 106", "assert max_sum_increasing_subsequence([3, 4, 5, 10], 4) == 22", "assert max_sum_increasing_subsequence([10, 5, 4, 3], 4) == 10"], "challenge_test_list": []}
{"text": "Write a python function to check whether two given lines are parallel or not.", "code": "def parallel_lines(line1, line2):\r\n  return line1[0]/line1[1] == line2[0]/line2[1]", "task_id": 525, "test_setup_code": "", "test_list": ["assert parallel_lines([2,3,4], [2,3,8]) == True", "assert parallel_lines([2,3,4], [4,-3,8]) == False", "assert parallel_lines([3,3],[5,5]) == True"], "challenge_test_list": []}
{"text": "Write a python function to capitalize first and last letters of each word of a given string.", "code": "def capitalize_first_last_letters(str1):\r\n     str1 = result = str1.title()\r\n     result =  \"\"\r\n     for word in str1.split():\r\n        result += word[:-1] + word[-1].upper() + \" \"\r\n     return result[:-1]  ", "task_id": 526, "test_setup_code": "", "test_list": ["assert capitalize_first_last_letters(\"python\") == \"PythoN\"", "assert capitalize_first_last_letters(\"bigdata\") == \"BigdatA\"", "assert capitalize_first_last_letters(\"Hadoop\") == \"HadooP\""], "challenge_test_list": []}
{"text": "Write a function to find all pairs in an integer array whose sum is equal to a given number.", "code": "def get_pairs_count(arr, n, sum):\r\n    count = 0 \r\n    for i in range(0, n):\r\n        for j in range(i + 1, n):\r\n            if arr[i] + arr[j] == sum:\r\n                count += 1\r\n    return count", "task_id": 527, "test_setup_code": "", "test_list": ["assert get_pairs_count([1, 5, 7, -1, 5], 5, 6) == 3", "assert get_pairs_count([1, 5, 7, -1], 4, 6) == 2", "assert get_pairs_count([1, 1, 1, 1], 4, 2) == 6"], "challenge_test_list": []}
{"text": "Write a function to find the list of lists with minimum length.", "code": "def min_length(list1):\r\n   min_length = min(len(x) for x in  list1 )  \r\n   min_list = min((x) for x in   list1)\r\n   return(min_length, min_list)     ", "task_id": 528, "test_setup_code": "", "test_list": ["assert min_length([[0], [1, 3], [5, 7], [9, 11], [13, 15, 17]])==(1, [0])", "assert min_length([[1], [5, 7], [10, 12, 14,15]])==(1, [1])", "assert min_length([[5], [15,20,25]])==(1, [5])"], "challenge_test_list": []}
{"text": "Write a function to find the nth jacobsthal-lucas number.", "code": "def jacobsthal_lucas(n): \r\n\tdp=[0] * (n + 1) \r\n\tdp[0] = 2\r\n\tdp[1] = 1\r\n\tfor i in range(2, n+1): \r\n\t\tdp[i] = dp[i - 1] + 2 * dp[i - 2]; \r\n\treturn dp[n]", "task_id": 529, "test_setup_code": "", "test_list": ["assert jacobsthal_lucas(5) == 31", "assert jacobsthal_lucas(2) == 5", "assert jacobsthal_lucas(4) == 17"], "challenge_test_list": []}
{"text": "Write a function to find the ration of negative numbers in an array of integers.", "code": "from array import array\r\ndef negative_count(nums):\r\n    n = len(nums)\r\n    n1 = 0\r\n    for x in nums:\r\n        if x < 0:\r\n            n1 += 1\r\n        else:\r\n          None\r\n    return round(n1/n,2)", "task_id": 530, "test_setup_code": "", "test_list": ["assert negative_count([0, 1, 2, -1, -5, 6, 0, -3, -2, 3, 4, 6, 8])==0.31", "assert negative_count([2, 1, 2, -1, -5, 6, 4, -3, -2, 3, 4, 6, 8])==0.31", "assert negative_count([2, 4, -6, -9, 11, -12, 14, -5, 17])==0.44"], "challenge_test_list": []}
{"text": "Write a function to find minimum number of coins that make a given value.", "code": "import sys \r\ndef min_coins(coins, m, V): \r\n    if (V == 0): \r\n        return 0\r\n    res = sys.maxsize \r\n    for i in range(0, m): \r\n        if (coins[i] <= V): \r\n            sub_res = min_coins(coins, m, V-coins[i]) \r\n            if (sub_res != sys.maxsize and sub_res + 1 < res): \r\n                res = sub_res + 1  \r\n    return res ", "task_id": 531, "test_setup_code": "", "test_list": ["assert min_coins([9, 6, 5, 1] ,4,11)==2", "assert min_coins([4,5,6,7,8,9],6,9)==1", "assert min_coins([1, 2, 3],3,4)==2"], "challenge_test_list": []}
{"text": "Write a function to check if the two given strings are permutations of each other.", "code": "def check_permutation(str1, str2):\r\n  n1=len(str1)\r\n  n2=len(str2)\r\n  if(n1!=n2):\r\n    return False\r\n  a=sorted(str1)\r\n  str1=\" \".join(a)\r\n  b=sorted(str2)\r\n  str2=\" \".join(b)\r\n  for i in range(0, n1, 1):\r\n    if(str1[i] != str2[i]):\r\n      return False\r\n  return True", "task_id": 532, "test_setup_code": "", "test_list": ["assert check_permutation(\"abc\", \"cba\") == True", "assert check_permutation(\"test\", \"ttew\") == False", "assert check_permutation(\"xxyz\", \"yxzx\") == True"], "challenge_test_list": []}
{"text": "Write a function to remove particular data type elements from the given tuple.", "code": "def remove_datatype(test_tuple, data_type):\r\n  res = []\r\n  for ele in test_tuple:\r\n    if not isinstance(ele, data_type):\r\n      res.append(ele)\r\n  return (res) ", "task_id": 533, "test_setup_code": "", "test_list": ["assert remove_datatype((4, 5, 4, 7.7, 1.2), int) == [7.7, 1.2]", "assert remove_datatype((7, 8, 9, \"SR\"), str) == [7, 8, 9]", "assert remove_datatype((7, 1.1, 2, 2.2), float) == [7, 2]"], "challenge_test_list": []}
{"text": "Write a function to search a literals string in a string and also find the location within the original string where the pattern occurs.", "code": "import re\r\ndef search_literal(pattern,text):\r\n match = re.search(pattern, text)\r\n s = match.start()\r\n e = match.end()\r\n return (s, e)", "task_id": 534, "test_setup_code": "", "test_list": ["assert search_literal('python','python programming language')==(0,6)", "assert search_literal('programming','python programming language')==(7,18)", "assert search_literal('language','python programming language')==(19,27)"], "challenge_test_list": []}
{"text": "Write a function to find the top or bottom surface area of a cylinder.", "code": "def topbottom_surfacearea(r):\r\n  toporbottomarea=3.1415*r*r\r\n  return toporbottomarea", "task_id": 535, "test_setup_code": "", "test_list": ["assert topbottom_surfacearea(10)==314.15000000000003", "assert topbottom_surfacearea(5)==78.53750000000001", "assert topbottom_surfacearea(4)==50.264"], "challenge_test_list": []}
{"text": "Write a function to select the nth items of a list.", "code": "def nth_items(list,n):\r\n return list[::n]", "task_id": 536, "test_setup_code": "", "test_list": ["assert nth_items([1, 2, 3, 4, 5, 6, 7, 8, 9],2)==[1, 3, 5, 7, 9] ", "assert nth_items([10,15,19,17,16,18],3)==[10,17] ", "assert nth_items([14,16,19,15,17],4)==[14,17]"], "challenge_test_list": []}
{"text": "Write a python function to find the first repeated word in a given string.", "code": "def first_repeated_word(str1):\r\n  temp = set()\r\n  for word in str1.split():\r\n    if word in temp:\r\n      return word;\r\n    else:\r\n      temp.add(word)\r\n  return 'None'", "task_id": 537, "test_setup_code": "", "test_list": ["assert first_repeated_word(\"ab ca bc ab\") == \"ab\"", "assert first_repeated_word(\"ab ca bc\") == 'None'", "assert first_repeated_word(\"ab ca bc ca ab bc\") == \"ca\""], "challenge_test_list": []}
{"text": "Write a python function to convert a given string list to a tuple.", "code": "def string_list_to_tuple(str1):\r\n    result = tuple(x for x in str1 if not x.isspace()) \r\n    return result", "task_id": 538, "test_setup_code": "", "test_list": ["assert string_list_to_tuple((\"python 3.0\")) == ('p', 'y', 't', 'h', 'o', 'n', '3', '.', '0')", "assert string_list_to_tuple((\"bigdata\")) == ('b', 'i', 'g', 'd', 'a', 't', 'a')", "assert string_list_to_tuple((\"language\")) == ('l', 'a', 'n', 'g', 'u', 'a', 'g','e')"], "challenge_test_list": []}
{"text": "Write a function to create a list containing the power of said number in bases raised to the corresponding number in the index using map function.", "code": "def basesnum_coresspondingnum(bases_num,index):\r\n  result = list(map(pow, bases_num, index))\r\n  return result", "task_id": 539, "test_setup_code": "", "test_list": ["assert basesnum_coresspondingnum([10, 20, 30, 40, 50, 60, 70, 80, 90, 100],[1, 2, 3, 4, 5, 6, 7, 8, 9, 10])==[10, 400, 27000, 2560000, 312500000, 46656000000, 8235430000000, 1677721600000000, 387420489000000000, 100000000000000000000]", "assert basesnum_coresspondingnum([1, 2, 3, 4, 5, 6, 7],[10, 20, 30, 40, 50, 60, 70])==[1, 1048576, 205891132094649, 1208925819614629174706176, 88817841970012523233890533447265625, 48873677980689257489322752273774603865660850176, 143503601609868434285603076356671071740077383739246066639249]", "assert basesnum_coresspondingnum([4, 8, 12, 16, 20, 24, 28],[3, 6, 9, 12, 15, 18, 21])==[64, 262144, 5159780352, 281474976710656, 32768000000000000000, 6979147079584381377970176, 2456510688823056210273111113728]"], "challenge_test_list": []}
{"text": "Write a python function to find the difference between highest and least frequencies in a given array.", "code": "def find_Diff(arr,n): \r\n    arr.sort()  \r\n    count = 0; max_count = 0; min_count = n \r\n    for i in range(0,(n-1)): \r\n        if arr[i] == arr[i + 1]: \r\n            count += 1\r\n            continue\r\n        else: \r\n            max_count = max(max_count,count) \r\n            min_count = min(min_count,count) \r\n            count = 0\r\n    return max_count - min_count ", "task_id": 540, "test_setup_code": "", "test_list": ["assert find_Diff([1,1,2,2,7,8,4,5,1,4],10) == 2", "assert find_Diff([1,7,9,2,3,3,1,3,3],9) == 3", "assert find_Diff([1,2,1,2],4) == 0"], "challenge_test_list": []}
{"text": "Write a function to find if the given number is abundant or not.", "code": "import math \r\ndef get_sum(n): \r\n\tsum = 0\r\n\ti = 1\r\n\twhile i <= (math.sqrt(n)): \r\n\t\tif n%i == 0: \r\n\t\t\tif n/i == i : \r\n\t\t\t\tsum = sum + i \r\n\t\t\telse: \r\n\t\t\t\tsum = sum + i \r\n\t\t\t\tsum = sum + (n / i ) \r\n\t\ti = i + 1\r\n\tsum = sum - n \r\n\treturn sum\r\ndef check_abundant(n): \r\n\tif (get_sum(n) > n): \r\n\t\treturn True\r\n\telse: \r\n\t\treturn False", "task_id": 541, "test_setup_code": "", "test_list": ["assert check_abundant(12) == True", "assert check_abundant(15) == False", "assert check_abundant(18) == True"], "challenge_test_list": []}
{"text": "Write a function to replace all occurrences of spaces, commas, or dots with a colon in the given string by using regex.", "code": "import re\r\ndef fill_spaces(text):\r\n  return (re.sub(\"[ ,.]\", \":\", text))", "task_id": 542, "test_setup_code": "", "test_list": ["assert fill_spaces('Boult Curve Wireless Neckband') == 'Boult:Curve:Wireless:Neckband'", "assert fill_spaces('Stereo Sound Sweatproof') == 'Stereo:Sound:Sweatproof'", "assert fill_spaces('Probass Curve Audio') == 'Probass:Curve:Audio'"], "challenge_test_list": []}
{"text": "Write a function to add two numbers and print number of digits of sum.", "code": "def count_digits(num1,num2):\r\n    number=num1+num2\r\n    count = 0\r\n    while(number > 0):\r\n        number = number // 10\r\n        count = count + 1\r\n    return count", "task_id": 543, "test_setup_code": "", "test_list": ["assert count_digits(9875,10)==(4)", "assert count_digits(98759853034,100)==(11)", "assert count_digits(1234567,500)==(7)"], "challenge_test_list": []}
{"text": "Write a function to flatten the tuple list to a string.", "code": "def flatten_tuple(test_list):\r\n  res = ' '.join([idx for tup in test_list for idx in tup])\r\n  return (res) ", "task_id": 544, "test_setup_code": "", "test_list": ["assert flatten_tuple([('1', '4', '6'), ('5', '8'), ('2', '9'), ('1', '10')]) == '1 4 6 5 8 2 9 1 10'", "assert flatten_tuple([('2', '3', '4'), ('6', '9'), ('3', '2'), ('2', '11')]) == '2 3 4 6 9 3 2 2 11'", "assert flatten_tuple([('14', '21', '9'), ('24', '19'), ('12', '29'), ('23', '17')]) == '14 21 9 24 19 12 29 23 17'"], "challenge_test_list": []}
{"text": "Write a python function to toggle only first and last bits of a given number.", "code": "def take_L_and_F_set_bits(n) : \r\n    n = n | n >> 1\r\n    n = n | n >> 2\r\n    n = n | n >> 4\r\n    n = n | n >> 8\r\n    n = n | n >> 16 \r\n    return ((n + 1) >> 1) + 1      \r\ndef toggle_F_and_L_bits(n) :  \r\n    if (n == 1) : \r\n        return 0 \r\n    return n ^ take_L_and_F_set_bits(n) ", "task_id": 545, "test_setup_code": "", "test_list": ["assert toggle_F_and_L_bits(10) == 3", "assert toggle_F_and_L_bits(15) == 6", "assert toggle_F_and_L_bits(20) == 5"], "challenge_test_list": []}
{"text": "Write a function to find the last occurrence of a character in a string.", "code": "def last_occurence_char(string,char):\r\n flag = -1\r\n for i in range(len(string)):\r\n     if(string[i] == char):\r\n         flag = i\r\n if(flag == -1):\r\n    return None\r\n else:\r\n    return flag + 1", "task_id": 546, "test_setup_code": "", "test_list": ["assert last_occurence_char(\"hello world\",'l')==10", "assert last_occurence_char(\"language\",'g')==7", "assert last_occurence_char(\"little\",'y')==None"], "challenge_test_list": []}
{"text": "Write a python function to find the sum of hamming distances of all consecutive numbers from o to n.", "code": "def Total_Hamming_Distance(n):   \r\n    i = 1\r\n    sum = 0\r\n    while (n // i > 0):  \r\n        sum = sum + n // i  \r\n        i = i * 2     \r\n    return sum", "task_id": 547, "test_setup_code": "", "test_list": ["assert Total_Hamming_Distance(4) == 7", "assert Total_Hamming_Distance(2) == 3", "assert Total_Hamming_Distance(5) == 8"], "challenge_test_list": []}
{"text": "Write a function to find the length of the longest increasing subsequence of the given sequence.", "code": "def longest_increasing_subsequence(arr): \r\n\tn = len(arr) \r\n\tlongest_increasing_subsequence = [1]*n \r\n\tfor i in range (1 , n): \r\n\t\tfor j in range(0 , i): \r\n\t\t\tif arr[i] > arr[j] and longest_increasing_subsequence[i]< longest_increasing_subsequence[j] + 1 : \r\n\t\t\t\tlongest_increasing_subsequence[i] = longest_increasing_subsequence[j]+1\r\n\tmaximum = 0\r\n\tfor i in range(n): \r\n\t\tmaximum = max(maximum , longest_increasing_subsequence[i]) \r\n\treturn maximum", "task_id": 548, "test_setup_code": "", "test_list": ["assert longest_increasing_subsequence([10, 22, 9, 33, 21, 50, 41, 60]) == 5", "assert longest_increasing_subsequence([3, 10, 2, 1, 20]) == 3", "assert longest_increasing_subsequence([50, 3, 10, 7, 40, 80]) == 4 "], "challenge_test_list": []}
{"text": "Write a python function to find the sum of fifth power of first n odd natural numbers.", "code": "def odd_Num_Sum(n) : \r\n    j = 0\r\n    sm = 0\r\n    for i in range(1,n+1) : \r\n        j = (2*i-1) \r\n        sm = sm + (j*j*j*j*j)     \r\n    return sm ", "task_id": 549, "test_setup_code": "", "test_list": ["assert odd_Num_Sum(1) == 1", "assert odd_Num_Sum(2) == 244", "assert odd_Num_Sum(3) == 3369"], "challenge_test_list": []}
{"text": "Write a python function to find the maximum element in a sorted and rotated array.", "code": "def find_Max(arr,low,high): \r\n    if (high < low): \r\n        return arr[0] \r\n    if (high == low): \r\n        return arr[low] \r\n    mid = low + (high - low) // 2 \r\n    if (mid < high and arr[mid + 1] < arr[mid]): \r\n        return arr[mid] \r\n    if (mid > low and arr[mid] < arr[mid - 1]): \r\n        return arr[mid - 1]  \r\n    if (arr[low] > arr[mid]): \r\n        return find_Max(arr,low,mid - 1) \r\n    else: \r\n        return find_Max(arr,mid + 1,high) ", "task_id": 550, "test_setup_code": "", "test_list": ["assert find_Max([2,3,5,6,9],0,4) == 9", "assert find_Max([3,4,5,2,1],0,4) == 5", "assert find_Max([1,2,3],0,2) == 3"], "challenge_test_list": []}
{"text": "Write a function to extract a specified column from a given nested list.", "code": "def extract_column(list1, n):\r\n   result = [i.pop(n) for i in list1]\r\n   return result ", "task_id": 551, "test_setup_code": "", "test_list": ["assert extract_column([[1, 2, 3], [2, 4, 5], [1, 1, 1]],0)==[1, 2, 1]", "assert extract_column([[1, 2, 3], [-2, 4, -5], [1, -1, 1]],2)==[3, -5, 1]", "assert extract_column([[1, 3], [5, 7], [1, 3], [13, 15, 17], [5, 7], [9, 11]],0)==[1, 5, 1, 13, 5, 9]"], "challenge_test_list": []}
{"text": "Write a python function to check whether a given sequence is linear or not.", "code": "def Seq_Linear(seq_nums):\r\n  seq_nums = [seq_nums[x] - seq_nums[x-1] for x in range(1, len(seq_nums))]\r\n  if len(set(seq_nums)) == 1: \r\n    return \"Linear Sequence\"\r\n  else:\r\n    return \"Non Linear Sequence\"", "task_id": 552, "test_setup_code": "", "test_list": ["assert Seq_Linear([0,2,4,6,8,10]) == \"Linear Sequence\"", "assert Seq_Linear([1,2,3]) == \"Linear Sequence\"", "assert Seq_Linear([1,5,2]) == \"Non Linear Sequence\""], "challenge_test_list": []}
{"text": "Write a function to convert the given tuple to a floating-point number.", "code": "def tuple_to_float(test_tup):\r\n  res = float('.'.join(str(ele) for ele in test_tup))\r\n  return (res) ", "task_id": 553, "test_setup_code": "", "test_list": ["assert tuple_to_float((4, 56)) == 4.56", "assert tuple_to_float((7, 256)) == 7.256", "assert tuple_to_float((8, 123)) == 8.123"], "challenge_test_list": []}
{"text": "Write a python function to find odd numbers from a mixed list.", "code": "def Split(list): \r\n    od_li = [] \r\n    for i in list: \r\n        if (i % 2 != 0): \r\n            od_li.append(i)  \r\n    return od_li", "task_id": 554, "test_setup_code": "", "test_list": ["assert Split([1,2,3,4,5,6]) == [1,3,5]", "assert Split([10,11,12,13]) == [11,13]", "assert Split([7,8,9,1]) == [7,9,1]"], "challenge_test_list": []}
{"text": "Write a python function to find the difference between sum of cubes of first n natural numbers and the sum of first n natural numbers.", "code": "def difference(n) :  \r\n    S = (n*(n + 1))//2;  \r\n    res = S*(S-1);  \r\n    return res;  ", "task_id": 555, "test_setup_code": "", "test_list": ["assert difference(3) == 30", "assert difference(5) == 210", "assert difference(2) == 6"], "challenge_test_list": []}
{"text": "Write a python function to count the pairs with xor as an odd number.", "code": "def find_Odd_Pair(A,N) : \r\n    oddPair = 0\r\n    for i in range(0,N) :  \r\n        for j in range(i+1,N) :  \r\n            if ((A[i] ^ A[j]) % 2 != 0):  \r\n                oddPair+=1  \r\n    return oddPair  ", "task_id": 556, "test_setup_code": "", "test_list": ["assert find_Odd_Pair([5,4,7,2,1],5) == 6", "assert find_Odd_Pair([7,2,8,1,0,5,11],7) == 12", "assert find_Odd_Pair([1,2,3],3) == 2"], "challenge_test_list": []}
{"text": "Write a function to toggle characters case in a string.", "code": "def toggle_string(string):\r\n string1 = string.swapcase()\r\n return string1", "task_id": 557, "test_setup_code": "", "test_list": ["assert toggle_string(\"Python\")==(\"pYTHON\")", "assert toggle_string(\"Pangram\")==(\"pANGRAM\")", "assert toggle_string(\"LIttLE\")==(\"liTTle\")"], "challenge_test_list": []}
{"text": "Write a python function to find the digit distance between two integers.", "code": "def digit_distance_nums(n1, n2):\r\n         return sum(map(int,str(abs(n1-n2))))", "task_id": 558, "test_setup_code": "", "test_list": ["assert digit_distance_nums(1,2) == 1", "assert digit_distance_nums(23,56) == 6", "assert digit_distance_nums(123,256) == 7"], "challenge_test_list": []}
{"text": "Write a function to find the largest sum of contiguous subarray in the given array.", "code": "def max_sub_array_sum(a, size):\r\n  max_so_far = 0\r\n  max_ending_here = 0\r\n  for i in range(0, size):\r\n    max_ending_here = max_ending_here + a[i]\r\n    if max_ending_here < 0:\r\n      max_ending_here = 0\r\n    elif (max_so_far < max_ending_here):\r\n      max_so_far = max_ending_here\r\n  return max_so_far", "task_id": 559, "test_setup_code": "", "test_list": ["assert max_sub_array_sum([-2, -3, 4, -1, -2, 1, 5, -3], 8) == 7", "assert max_sub_array_sum([-3, -4, 5, -2, -3, 2, 6, -4], 8) == 8", "assert max_sub_array_sum([-4, -5, 6, -3, -4, 3, 7, -5], 8) == 10"], "challenge_test_list": []}
{"text": "Write a function to find the union of elements of the given tuples.", "code": "def union_elements(test_tup1, test_tup2):\r\n  res = tuple(set(test_tup1 + test_tup2))\r\n  return (res) ", "task_id": 560, "test_setup_code": "", "test_list": ["assert union_elements((3, 4, 5, 6),(5, 7, 4, 10) ) == (3, 4, 5, 6, 7, 10)", "assert union_elements((1, 2, 3, 4),(3, 4, 5, 6) ) == (1, 2, 3, 4, 5, 6)", "assert union_elements((11, 12, 13, 14),(13, 15, 16, 17) ) == (11, 12, 13, 14, 15, 16, 17)"], "challenge_test_list": []}
{"text": "Write a function to assign with each element, its pair elements from other similar pairs in the given tuple.", "code": "def assign_elements(test_list):\r\n  res = dict()\r\n  for key, val in test_list:\r\n    res.setdefault(val, [])\r\n    res.setdefault(key, []).append(val)\r\n  return (res) ", "task_id": 561, "test_setup_code": "", "test_list": ["assert assign_elements([(5, 3), (7, 5), (2, 7), (3, 8), (8, 4)] ) == {3: [8], 5: [3], 7: [5], 2: [7], 8: [4], 4: []}", "assert assign_elements([(6, 4), (9, 4), (3, 8), (4, 9), (9, 5)] ) == {4: [9], 6: [4], 9: [4, 5], 8: [], 3: [8], 5: []}", "assert assign_elements([(6, 2), (6, 8), (4, 9), (4, 9), (3, 7)] ) == {2: [], 6: [2, 8], 8: [], 9: [], 4: [9, 9], 7: [], 3: [7]}"], "challenge_test_list": []}
{"text": "Write a python function to find the maximum length of sublist.", "code": "def Find_Max_Length(lst):  \r\n    maxLength = max(len(x) for x in lst )\r\n    return maxLength ", "task_id": 562, "test_setup_code": "", "test_list": ["assert Find_Max_Length([[1],[1,4],[5,6,7,8]]) == 4", "assert Find_Max_Length([[0,1],[2,2,],[3,2,1]]) == 3", "assert Find_Max_Length([[7],[22,23],[13,14,15],[10,20,30,40,50]]) == 5"], "challenge_test_list": []}
{"text": "Write a function to extract values between quotation marks of a string.", "code": "import re\r\ndef extract_values(text):\r\n return (re.findall(r'\"(.*?)\"', text))", "task_id": 563, "test_setup_code": "", "test_list": ["assert extract_values('\"Python\", \"PHP\", \"Java\"')==['Python', 'PHP', 'Java']", "assert extract_values('\"python\",\"program\",\"language\"')==['python','program','language']", "assert extract_values('\"red\",\"blue\",\"green\",\"yellow\"')==['red','blue','green','yellow']"], "challenge_test_list": []}
{"text": "Write a python function to count unequal element pairs from the given array.", "code": "def count_Pairs(arr,n): \r\n    cnt = 0; \r\n    for i in range(n): \r\n        for j in range(i + 1,n): \r\n            if (arr[i] != arr[j]): \r\n                cnt += 1; \r\n    return cnt; ", "task_id": 564, "test_setup_code": "", "test_list": ["assert count_Pairs([1,2,1],3) == 2", "assert count_Pairs([1,1,1,1],4) == 0", "assert count_Pairs([1,2,3,4,5],5) == 10"], "challenge_test_list": []}
{"text": "Write a python function to split a string into characters.", "code": "def split(word): \r\n    return [char for char in word] ", "task_id": 565, "test_setup_code": "", "test_list": ["assert split('python') == ['p','y','t','h','o','n']", "assert split('Name') == ['N','a','m','e']", "assert split('program') == ['p','r','o','g','r','a','m']"], "challenge_test_list": []}
{"text": "Write a function to get the sum of a non-negative integer.", "code": "def sum_digits(n):\r\n  if n == 0:\r\n    return 0\r\n  else:\r\n    return n % 10 + sum_digits(int(n / 10))", "task_id": 566, "test_setup_code": "", "test_list": ["assert sum_digits(345)==12", "assert sum_digits(12)==3", "assert sum_digits(97)==16"], "challenge_test_list": []}
{"text": "Write a function to check whether a specified list is sorted or not.", "code": "def issort_list(list1):\r\n    result = all(list1[i] <= list1[i+1] for i in range(len(list1)-1))\r\n    return result", "task_id": 567, "test_setup_code": "", "test_list": ["assert issort_list([1,2,4,6,8,10,12,14,16,17])==True", "assert issort_list([1, 2, 4, 6, 8, 10, 12, 14, 20, 17])==False", "assert issort_list([1, 2, 4, 6, 8, 10,15,14,20])==False"], "challenge_test_list": []}
{"text": "Write a function to create a list of empty dictionaries.", "code": "def empty_list(length):\r\n empty_list = [{} for _ in range(length)]\r\n return empty_list", "task_id": 568, "test_setup_code": "", "test_list": ["assert empty_list(5)==[{},{},{},{},{}]", "assert empty_list(6)==[{},{},{},{},{},{}]", "assert empty_list(7)==[{},{},{},{},{},{},{}]"], "challenge_test_list": []}
{"text": "Write a function to sort each sublist of strings in a given list of lists.", "code": "def sort_sublists(list1):\r\n    result = list(map(sorted,list1)) \r\n    return result", "task_id": 569, "test_setup_code": "", "test_list": ["assert sort_sublists([['green', 'orange'], ['black', 'white'], ['white', 'black', 'orange']])==[['green', 'orange'], ['black', 'white'], ['black', 'orange', 'white']]", "assert sort_sublists([['green', 'orange'], ['black'], ['green', 'orange'], ['white']])==[['green', 'orange'], ['black'], ['green', 'orange'], ['white']]", "assert sort_sublists([['a','b'],['d','c'],['g','h'] , ['f','e']])==[['a', 'b'], ['c', 'd'], ['g', 'h'], ['e', 'f']]"], "challenge_test_list": []}
{"text": "Write a function to remove words from a given list of strings containing a character or string.", "code": "def remove_words(list1, charlist):\r\n    new_list = []\r\n    for line in list1:\r\n        new_words = ' '.join([word for word in line.split() if not any([phrase in word for phrase in charlist])])\r\n        new_list.append(new_words)\r\n    return new_list", "task_id": 570, "test_setup_code": "", "test_list": ["assert remove_words(['Red color', 'Orange#', 'Green', 'Orange @', \"White\"],['#', 'color', '@'])==['Red', '', 'Green', 'Orange', 'White']", "assert remove_words(['Red &', 'Orange+', 'Green', 'Orange @', 'White'],['&', '+', '@'])==['Red', '', 'Green', 'Orange', 'White']", "assert remove_words(['Red &', 'Orange+', 'Green', 'Orange @', 'White'],['@'])==['Red &', 'Orange+', 'Green', 'Orange', 'White']"], "challenge_test_list": []}
{"text": "Write a function to find maximum possible sum of disjoint pairs for the given array of integers and a number k.", "code": "def max_sum_pair_diff_lessthan_K(arr, N, K): \r\n\tarr.sort() \r\n\tdp = [0] * N \r\n\tdp[0] = 0\r\n\tfor i in range(1, N): \r\n\t\tdp[i] = dp[i-1] \r\n\t\tif (arr[i] - arr[i-1] < K): \r\n\t\t\tif (i >= 2): \r\n\t\t\t\tdp[i] = max(dp[i], dp[i-2] + arr[i] + arr[i-1]); \r\n\t\t\telse: \r\n\t\t\t\tdp[i] = max(dp[i], arr[i] + arr[i-1]); \r\n\treturn dp[N - 1]", "task_id": 571, "test_setup_code": "", "test_list": ["assert max_sum_pair_diff_lessthan_K([3, 5, 10, 15, 17, 12, 9], 7, 4) == 62", "assert max_sum_pair_diff_lessthan_K([5, 15, 10, 300], 4, 12) == 25", "assert max_sum_pair_diff_lessthan_K([1, 2, 3, 4, 5, 6], 6, 6) == 21"], "challenge_test_list": []}
{"text": "Write a python function to remove two duplicate numbers from a given number of lists.", "code": "def two_unique_nums(nums):\r\n  return [i for i in nums if nums.count(i)==1]", "task_id": 572, "test_setup_code": "", "test_list": ["assert two_unique_nums([1,2,3,2,3,4,5]) == [1, 4, 5]", "assert two_unique_nums([1,2,3,2,4,5]) == [1, 3, 4, 5]", "assert two_unique_nums([1,2,3,4,5]) == [1, 2, 3, 4, 5]"], "challenge_test_list": []}
{"text": "Write a python function to calculate the product of the unique numbers of a given list.", "code": "def unique_product(list_data):\r\n    temp = list(set(list_data))\r\n    p = 1\r\n    for i in temp:\r\n        p *= i\r\n    return p", "task_id": 573, "test_setup_code": "", "test_list": ["assert unique_product([10, 20, 30, 40, 20, 50, 60, 40]) ==  720000000", "assert unique_product([1, 2, 3, 1,]) == 6", "assert unique_product([7, 8, 9, 0, 1, 1]) == 0"], "challenge_test_list": []}
{"text": "Write a function to find the surface area of a cylinder.", "code": "def surfacearea_cylinder(r,h):\r\n  surfacearea=((2*3.1415*r*r) +(2*3.1415*r*h))\r\n  return surfacearea", "task_id": 574, "test_setup_code": "", "test_list": ["assert surfacearea_cylinder(10,5)==942.45", "assert surfacearea_cylinder(4,5)==226.18800000000002", "assert surfacearea_cylinder(4,10)==351.848"], "challenge_test_list": []}
{"text": "Write a python function to find nth number in a sequence which is not a multiple of a given number.", "code": "def count_no (A,N,L,R): \r\n    count = 0\r\n    for i in range (L,R + 1): \r\n        if (i % A != 0): \r\n            count += 1\r\n        if (count == N): \r\n            break\r\n    return (i) ", "task_id": 575, "test_setup_code": "", "test_list": ["assert count_no(2,3,1,10) == 5", "assert count_no(3,6,4,20) == 11", "assert count_no(5,10,4,20) == 16"], "challenge_test_list": []}
{"text": "Write a python function to check whether an array is subarray of another or not.", "code": "def is_Sub_Array(A,B,n,m): \r\n    i = 0; j = 0; \r\n    while (i < n and j < m):  \r\n        if (A[i] == B[j]): \r\n            i += 1; \r\n            j += 1; \r\n            if (j == m): \r\n                return True;  \r\n        else: \r\n            i = i - j + 1; \r\n            j = 0;       \r\n    return False; ", "task_id": 576, "test_setup_code": "", "test_list": ["assert is_Sub_Array([1,4,3,5],[1,2],4,2) == False", "assert is_Sub_Array([1,2,1],[1,2,1],3,3) == True", "assert is_Sub_Array([1,0,2,2],[2,2,0],4,3) ==False"], "challenge_test_list": []}
{"text": "Write a python function to find the last digit in factorial of a given number.", "code": "def last_Digit_Factorial(n): \r\n    if (n == 0): return 1\r\n    elif (n <= 2): return n  \r\n    elif (n == 3): return 6\r\n    elif (n == 4): return 4 \r\n    else: \r\n      return 0", "task_id": 577, "test_setup_code": "", "test_list": ["assert last_Digit_Factorial(4) == 4", "assert last_Digit_Factorial(21) == 0", "assert last_Digit_Factorial(30) == 0"], "challenge_test_list": []}
{"text": "Write a function to interleave lists of the same length.", "code": "def interleave_lists(list1,list2,list3):\r\n    result = [el for pair in zip(list1, list2, list3) for el in pair]\r\n    return result", "task_id": 578, "test_setup_code": "", "test_list": ["assert interleave_lists([1,2,3,4,5,6,7],[10,20,30,40,50,60,70],[100,200,300,400,500,600,700])==[1, 10, 100, 2, 20, 200, 3, 30, 300, 4, 40, 400, 5, 50, 500, 6, 60, 600, 7, 70, 700]", "assert interleave_lists([10,20],[15,2],[5,10])==[10,15,5,20,2,10]", "assert interleave_lists([11,44], [10,15], [20,5])==[11,10,20,44,15,5]"], "challenge_test_list": []}
{"text": "Write a function to find the dissimilar elements in the given two tuples.", "code": "def find_dissimilar(test_tup1, test_tup2):\r\n  res = tuple(set(test_tup1) ^ set(test_tup2))\r\n  return (res) ", "task_id": 579, "test_setup_code": "", "test_list": ["assert find_dissimilar((3, 4, 5, 6), (5, 7, 4, 10)) == (3, 6, 7, 10)", "assert find_dissimilar((1, 2, 3, 4), (7, 2, 3, 9)) == (1, 4, 7, 9)", "assert find_dissimilar((21, 11, 25, 26), (26, 34, 21, 36)) == (34, 36, 11, 25)"], "challenge_test_list": []}
{"text": "Write a function to extract the even elements in the nested mixed tuple.", "code": "def even_ele(test_tuple, even_fnc): \r\n\tres = tuple() \r\n\tfor ele in test_tuple: \r\n\t\tif isinstance(ele, tuple): \r\n\t\t\tres += (even_ele(ele, even_fnc), ) \r\n\t\telif even_fnc(ele): \r\n\t\t\tres += (ele, ) \r\n\treturn res \r\ndef extract_even(test_tuple):\r\n  res = even_ele(test_tuple, lambda x: x % 2 == 0)\r\n  return (res) ", "task_id": 580, "test_setup_code": "", "test_list": ["assert extract_even((4, 5, (7, 6, (2, 4)), 6, 8)) == (4, (6, (2, 4)), 6, 8)", "assert extract_even((5, 6, (8, 7, (4, 8)), 7, 9)) == (6, (8, (4, 8)))", "assert extract_even((5, 6, (9, 8, (4, 6)), 8, 10)) == (6, (8, (4, 6)), 8, 10)"], "challenge_test_list": []}
{"text": "Write a python function to find the surface area of the square pyramid.", "code": "def surface_Area(b,s): \r\n    return 2 * b * s + pow(b,2) ", "task_id": 581, "test_setup_code": "", "test_list": ["assert surface_Area(3,4) == 33", "assert surface_Area(4,5) == 56", "assert surface_Area(1,2) == 5"], "challenge_test_list": []}
{"text": "Write a function to check if a dictionary is empty or not.", "code": "def my_dict(dict1):\r\n  if bool(dict1):\r\n     return False\r\n  else:\r\n     return True", "task_id": 582, "test_setup_code": "", "test_list": ["assert my_dict({10})==False", "assert my_dict({11})==False", "assert my_dict({})==True"], "challenge_test_list": []}
{"text": "Write a function for nth catalan number.", "code": "def catalan_number(num):\r\n    if num <=1:\r\n         return 1   \r\n    res_num = 0\r\n    for i in range(num):\r\n        res_num += catalan_number(i) * catalan_number(num-i-1)\r\n    return res_num", "task_id": 583, "test_setup_code": "", "test_list": ["assert catalan_number(10)==16796", "assert catalan_number(9)==4862", "assert catalan_number(7)==429"], "challenge_test_list": []}
{"text": "Write a function to find all adverbs and their positions in a given sentence by using regex.", "code": "import re\r\ndef find_adverbs(text):\r\n  for m in re.finditer(r\"\\w+ly\", text):\r\n    return ('%d-%d: %s' % (m.start(), m.end(), m.group(0)))", "task_id": 584, "test_setup_code": "", "test_list": ["assert find_adverbs(\"Clearly, he has no excuse for such behavior.\") == '0-7: Clearly'", "assert find_adverbs(\"Please handle the situation carefuly\") == '28-36: carefuly'", "assert find_adverbs(\"Complete the task quickly\") == '18-25: quickly'"], "challenge_test_list": []}
{"text": "Write a function to find the n - expensive price items from a given dataset using heap queue algorithm.", "code": "import heapq\r\ndef expensive_items(items,n):\r\n  expensive_items = heapq.nlargest(n, items, key=lambda s: s['price'])\r\n  return expensive_items", "task_id": 585, "test_setup_code": "", "test_list": ["assert expensive_items([{'name': 'Item-1', 'price': 101.1},{'name': 'Item-2', 'price': 555.22}],1)==[{'name': 'Item-2', 'price': 555.22}]", "assert expensive_items([{'name': 'Item-1', 'price': 101.1},{'name': 'Item-2', 'price': 555.22}, {'name': 'Item-3', 'price': 45.09}],2)==[{'name': 'Item-2', 'price': 555.22},{'name': 'Item-1', 'price': 101.1}]", "assert expensive_items([{'name': 'Item-1', 'price': 101.1},{'name': 'Item-2', 'price': 555.22}, {'name': 'Item-3', 'price': 45.09},{'name': 'Item-4', 'price': 22.75}],1)==[{'name': 'Item-2', 'price': 555.22}]"], "challenge_test_list": []}
{"text": "Write a python function to split the array and add the first part to the end.", "code": "def split_Arr(a,n,k):  \r\n   b = a[:k] \r\n   return (a[k::]+b[::]) ", "task_id": 586, "test_setup_code": "", "test_list": ["assert split_Arr([12,10,5,6,52,36],6,2) == [5,6,52,36,12,10]", "assert split_Arr([1,2,3,4],4,1) == [2,3,4,1]", "assert split_Arr([0,1,2,3,4,5,6,7],8,3) == [3,4,5,6,7,0,1,2]"], "challenge_test_list": []}
{"text": "Write a function to convert a list to a tuple.", "code": "def list_tuple(listx):\r\n  tuplex = tuple(listx)\r\n  return tuplex", "task_id": 587, "test_setup_code": "", "test_list": ["assert list_tuple([5, 10, 7, 4, 15, 3])==(5, 10, 7, 4, 15, 3)", "assert list_tuple([2, 4, 5, 6, 2, 3, 4, 4, 7])==(2, 4, 5, 6, 2, 3, 4, 4, 7)", "assert list_tuple([58,44,56])==(58,44,56)"], "challenge_test_list": []}
{"text": "Write a python function to find the difference between largest and smallest value in a given array.", "code": "def big_diff(nums):\r\n     diff= max(nums)-min(nums)\r\n     return diff", "task_id": 588, "test_setup_code": "", "test_list": ["assert big_diff([1,2,3,4]) == 3", "assert big_diff([4,5,12]) == 8", "assert big_diff([9,2,3]) == 7"], "challenge_test_list": []}
{"text": "Write a function to find perfect squares between two given numbers.", "code": "def perfect_squares(a, b):\r\n    lists=[]\r\n    for i in range (a,b+1):\r\n        j = 1;\r\n        while j*j <= i:\r\n            if j*j == i:\r\n                 lists.append(i)  \r\n            j = j+1\r\n        i = i+1\r\n    return lists", "task_id": 589, "test_setup_code": "", "test_list": ["assert perfect_squares(1,30)==[1, 4, 9, 16, 25]", "assert perfect_squares(50,100)==[64, 81, 100]", "assert perfect_squares(100,200)==[100, 121, 144, 169, 196]"], "challenge_test_list": []}
{"text": "Write a function to convert polar coordinates to rectangular coordinates.", "code": "import cmath\r\ndef polar_rect(x,y):\r\n cn = complex(x,y)\r\n cn=cmath.polar(cn)\r\n cn1 = cmath.rect(2, cmath.pi)\r\n return (cn,cn1)", "task_id": 590, "test_setup_code": "", "test_list": ["assert polar_rect(3,4)==((5.0, 0.9272952180016122), (-2+2.4492935982947064e-16j))", "assert polar_rect(4,7)==((8.06225774829855, 1.0516502125483738), (-2+2.4492935982947064e-16j))", "assert polar_rect(15,17)==((22.67156809750927, 0.8478169733934057), (-2+2.4492935982947064e-16j))"], "challenge_test_list": []}
{"text": "Write a python function to interchange the first and last elements in a list.", "code": "def swap_List(newList): \r\n    size = len(newList) \r\n    temp = newList[0] \r\n    newList[0] = newList[size - 1] \r\n    newList[size - 1] = temp  \r\n    return newList ", "task_id": 591, "test_setup_code": "", "test_list": ["assert swap_List([12, 35, 9, 56, 24]) == [24, 35, 9, 56, 12]", "assert swap_List([1, 2, 3]) == [3, 2, 1]", "assert swap_List([4, 5, 6]) == [6, 5, 4]"], "challenge_test_list": []}
{"text": "Write a python function to find sum of product of binomial co-efficients.", "code": "def binomial_Coeff(n,k): \r\n    C = [0] * (k + 1); \r\n    C[0] = 1; # nC0 is 1 \r\n    for i in range(1,n + 1):  \r\n        for j in range(min(i, k),0,-1): \r\n            C[j] = C[j] + C[j - 1]; \r\n    return C[k]; \r\ndef sum_Of_product(n): \r\n    return binomial_Coeff(2 * n,n - 1); ", "task_id": 592, "test_setup_code": "", "test_list": ["assert sum_Of_product(3) == 15", "assert sum_Of_product(4) == 56", "assert sum_Of_product(1) == 1"], "challenge_test_list": []}
{"text": "Write a function to remove leading zeroes from an ip address.", "code": "import re\r\ndef removezero_ip(ip):\r\n string = re.sub('\\.[0]*', '.', ip)\r\n return string\r", "task_id": 593, "test_setup_code": "", "test_list": ["assert removezero_ip(\"216.08.094.196\")==('216.8.94.196') ", "assert removezero_ip(\"12.01.024\")==('12.1.24') ", "assert removezero_ip(\"216.08.094.0196\")==('216.8.94.196') "], "challenge_test_list": []}
{"text": "Write a function to find the difference of first even and odd number of a given list.", "code": "def diff_even_odd(list1):\r\n    first_even = next((el for el in list1 if el%2==0),-1)\r\n    first_odd = next((el for el in list1 if el%2!=0),-1)\r\n    return (first_even-first_odd)", "task_id": 594, "test_setup_code": "", "test_list": ["assert diff_even_odd([1,3,5,7,4,1,6,8])==3", "assert diff_even_odd([1,2,3,4,5,6,7,8,9,10])==1", "assert diff_even_odd([1,5,7,9,10])==9"], "challenge_test_list": []}
{"text": "Write a python function to count minimum number of swaps required to convert one binary string to another.", "code": "def min_Swaps(str1,str2) : \r\n    count = 0\r\n    for i in range(len(str1)) :  \r\n        if str1[i] != str2[i] : \r\n            count += 1\r\n    if count % 2 == 0 : \r\n        return (count // 2) \r\n    else : \r\n        return (\"Not Possible\") ", "task_id": 595, "test_setup_code": "", "test_list": ["assert min_Swaps(\"1101\",\"1110\") == 1", "assert min_Swaps(\"111\",\"000\") == \"Not Possible\"", "assert min_Swaps(\"111\",\"110\") == \"Not Possible\""], "challenge_test_list": []}
{"text": "Write a function to find the size of the given tuple.", "code": "import sys \r\ndef tuple_size(tuple_list):\r\n  return (sys.getsizeof(tuple_list)) ", "task_id": 596, "test_setup_code": "", "test_list": ["assert tuple_size((\"A\", 1, \"B\", 2, \"C\", 3) ) == 104", "assert tuple_size((1, \"Raju\", 2, \"Nikhil\", 3, \"Deepanshu\") ) == 104", "assert tuple_size(((1, \"Lion\"), ( 2, \"Tiger\"), (3, \"Fox\"), (4, \"Wolf\"))  ) == 88"], "challenge_test_list": []}
{"text": "Write a function to find kth element from the given two sorted arrays.", "code": "def find_kth(arr1, arr2, m, n, k):\r\n\tsorted1 = [0] * (m + n)\r\n\ti = 0\r\n\tj = 0\r\n\td = 0\r\n\twhile (i < m and j < n):\r\n\t\tif (arr1[i] < arr2[j]):\r\n\t\t\tsorted1[d] = arr1[i]\r\n\t\t\ti += 1\r\n\t\telse:\r\n\t\t\tsorted1[d] = arr2[j]\r\n\t\t\tj += 1\r\n\t\td += 1\r\n\twhile (i < m):\r\n\t\tsorted1[d] = arr1[i]\r\n\t\td += 1\r\n\t\ti += 1\r\n\twhile (j < n):\r\n\t\tsorted1[d] = arr2[j]\r\n\t\td += 1\r\n\t\tj += 1\r\n\treturn sorted1[k - 1]", "task_id": 597, "test_setup_code": "", "test_list": ["assert find_kth([2, 3, 6, 7, 9], [1, 4, 8, 10], 5, 4, 5) == 6", "assert find_kth([100, 112, 256, 349, 770], [72, 86, 113, 119, 265, 445, 892], 5, 7, 7) == 256", "assert find_kth([3, 4, 7, 8, 10], [2, 5, 9, 11], 5, 4, 6) == 8"], "challenge_test_list": []}
{"text": "Write a function to check whether the given number is armstrong or not.", "code": "def armstrong_number(number):\r\n sum = 0\r\n times = 0\r\n temp = number\r\n while temp > 0:\r\n           times = times + 1\r\n           temp = temp // 10\r\n temp = number\r\n while temp > 0:\r\n           reminder = temp % 10\r\n           sum = sum + (reminder ** times)\r\n           temp //= 10\r\n if number == sum:\r\n           return True\r\n else:\r\n           return False", "task_id": 598, "test_setup_code": "", "test_list": ["assert armstrong_number(153)==True", "assert armstrong_number(259)==False", "assert armstrong_number(4458)==False"], "challenge_test_list": []}
{"text": "Write a function to find sum and average of first n natural numbers.", "code": "def sum_average(number):\r\n total = 0\r\n for value in range(1, number + 1):\r\n    total = total + value\r\n average = total / number\r\n return (total,average)", "task_id": 599, "test_setup_code": "", "test_list": ["assert sum_average(10)==(55, 5.5)", "assert sum_average(15)==(120, 8.0)", "assert sum_average(20)==(210, 10.5)"], "challenge_test_list": []}
{"text": "Write a python function to check whether the given number is even or not using bitwise operator.", "code": "def is_Even(n) : \r\n    if (n^1 == n+1) :\r\n        return True; \r\n    else :\r\n        return False; ", "task_id": 600, "test_setup_code": "", "test_list": ["assert is_Even(1) == False", "assert is_Even(2) == True", "assert is_Even(3) == False"], "challenge_test_list": []}
{"text": "Write a function to find the longest chain which can be formed from the given set of pairs.", "code": "class Pair(object): \r\n\tdef __init__(self, a, b): \r\n\t\tself.a = a \r\n\t\tself.b = b \r\ndef max_chain_length(arr, n): \r\n\tmax = 0\r\n\tmcl = [1 for i in range(n)] \r\n\tfor i in range(1, n): \r\n\t\tfor j in range(0, i): \r\n\t\t\tif (arr[i].a > arr[j].b and\r\n\t\t\t\tmcl[i] < mcl[j] + 1): \r\n\t\t\t\tmcl[i] = mcl[j] + 1\r\n\tfor i in range(n): \r\n\t\tif (max < mcl[i]): \r\n\t\t\tmax = mcl[i] \r\n\treturn max", "task_id": 601, "test_setup_code": "", "test_list": ["assert max_chain_length([Pair(5, 24), Pair(15, 25),Pair(27, 40), Pair(50, 60)], 4) == 3", "assert max_chain_length([Pair(1, 2), Pair(3, 4),Pair(5, 6), Pair(7, 8)], 4) == 4", "assert max_chain_length([Pair(19, 10), Pair(11, 12),Pair(13, 14), Pair(15, 16), Pair(31, 54)], 5) == 5"], "challenge_test_list": []}
{"text": "Write a python function to find the first repeated character in a given string.", "code": "def first_repeated_char(str1):\r\n  for index,c in enumerate(str1):\r\n    if str1[:index+1].count(c) > 1:\r\n      return c \r\n  return \"None\"", "task_id": 602, "test_setup_code": "", "test_list": ["assert first_repeated_char(\"abcabc\") == \"a\"", "assert first_repeated_char(\"abc\") == \"None\"", "assert first_repeated_char(\"123123\") == \"1\""], "challenge_test_list": []}
{"text": "Write a function to get a lucid number smaller than or equal to n.", "code": "def get_ludic(n):\r\n\tludics = []\r\n\tfor i in range(1, n + 1):\r\n\t\tludics.append(i)\r\n\tindex = 1\r\n\twhile(index != len(ludics)):\r\n\t\tfirst_ludic = ludics[index]\r\n\t\tremove_index = index + first_ludic\r\n\t\twhile(remove_index < len(ludics)):\r\n\t\t\tludics.remove(ludics[remove_index])\r\n\t\t\tremove_index = remove_index + first_ludic - 1\r\n\t\tindex += 1\r\n\treturn ludics", "task_id": 603, "test_setup_code": "", "test_list": ["assert get_ludic(10) == [1, 2, 3, 5, 7]", "assert get_ludic(25) == [1, 2, 3, 5, 7, 11, 13, 17, 23, 25]", "assert get_ludic(45) == [1, 2, 3, 5, 7, 11, 13, 17, 23, 25, 29, 37, 41, 43]"], "challenge_test_list": []}
{"text": "Write a function to reverse words in a given string.", "code": "def reverse_words(s):\r\n        return ' '.join(reversed(s.split()))", "task_id": 604, "test_setup_code": "", "test_list": ["assert reverse_words(\"python program\")==(\"program python\")", "assert reverse_words(\"java language\")==(\"language java\")", "assert reverse_words(\"indian man\")==(\"man indian\")"], "challenge_test_list": []}
{"text": "Write a function to check if the given integer is a prime number.", "code": "def prime_num(num):\r\n  if num >=1:\r\n   for i in range(2, num//2):\r\n     if (num % i) == 0:\r\n                return False\r\n     else:\r\n                return True\r\n  else:\r\n          return False", "task_id": 605, "test_setup_code": "", "test_list": ["assert prime_num(13)==True", "assert prime_num(7)==True", "assert prime_num(-1010)==False"], "challenge_test_list": []}
{"text": "Write a function to convert degrees to radians.", "code": "import math\r\ndef radian_degree(degree):\r\n radian = degree*(math.pi/180)\r\n return radian", "task_id": 606, "test_setup_code": "", "test_list": ["assert radian_degree(90)==1.5707963267948966", "assert radian_degree(60)==1.0471975511965976", "assert radian_degree(120)==2.0943951023931953"], "challenge_test_list": []}
{"text": "Write a function to search a literals string in a string and also find the location within the original string where the pattern occurs by using regex.", "code": "import re\r\npattern = 'fox'\r\ntext = 'The quick brown fox jumps over the lazy dog.'\r\ndef find_literals(text, pattern):\r\n  match = re.search(pattern, text)\r\n  s = match.start()\r\n  e = match.end()\r\n  return (match.re.pattern, s, e)", "task_id": 607, "test_setup_code": "", "test_list": ["assert find_literals('The quick brown fox jumps over the lazy dog.', 'fox') == ('fox', 16, 19)", "assert find_literals('Its been a very crazy procedure right', 'crazy') == ('crazy', 16, 21)", "assert find_literals('Hardest choices required strongest will', 'will') == ('will', 35, 39)"], "challenge_test_list": []}
{"text": "Write a python function to find nth bell number.", "code": "def bell_Number(n): \r\n    bell = [[0 for i in range(n+1)] for j in range(n+1)] \r\n    bell[0][0] = 1\r\n    for i in range(1, n+1):\r\n        bell[i][0] = bell[i-1][i-1]\r\n        for j in range(1, i+1): \r\n            bell[i][j] = bell[i-1][j-1] + bell[i][j-1] \r\n    return bell[n][0] ", "task_id": 608, "test_setup_code": "", "test_list": ["assert bell_Number(2) == 2", "assert bell_Number(3) == 5", "assert bell_Number(4) == 15"], "challenge_test_list": []}
{"text": "Write a python function to find minimum possible value for the given periodic function.", "code": "def floor_Min(A,B,N):\r\n    x = max(B - 1,N)\r\n    return (A*x) // B", "task_id": 609, "test_setup_code": "", "test_list": ["assert floor_Min(10,20,30) == 15", "assert floor_Min(1,2,1) == 0", "assert floor_Min(11,10,9) == 9"], "challenge_test_list": []}
{"text": "Write a python function to remove the k'th element from a given list.", "code": "def remove_kth_element(list1, L):\r\n    return  list1[:L-1] + list1[L:]", "task_id": 610, "test_setup_code": "", "test_list": ["assert remove_kth_element([1,1,2,3,4,4,5,1],3)==[1, 1, 3, 4, 4, 5, 1]", "assert remove_kth_element([0, 0, 1, 2, 3, 4, 4, 5, 6, 6, 6, 7, 8, 9, 4, 4],4)==[0, 0, 1, 3, 4, 4, 5, 6, 6, 6, 7, 8, 9, 4, 4]", "assert remove_kth_element([10, 10, 15, 19, 18, 18, 17, 26, 26, 17, 18, 10],5)==[10,10,15,19, 18, 17, 26, 26, 17, 18, 10]"], "challenge_test_list": []}
{"text": "Write a function to find the maximum of nth column from the given tuple list.", "code": "def max_of_nth(test_list, N):\r\n  res = max([sub[N] for sub in test_list])\r\n  return (res) ", "task_id": 611, "test_setup_code": "", "test_list": ["assert max_of_nth([(5, 6, 7), (1, 3, 5), (8, 9, 19)], 2) == 19", "assert max_of_nth([(6, 7, 8), (2, 4, 6), (9, 10, 20)], 1) == 10", "assert max_of_nth([(7, 8, 9), (3, 5, 7), (10, 11, 21)], 1) == 11"], "challenge_test_list": []}
{"text": "Write a python function to merge the first and last elements separately in a list of lists.", "code": "def merge(lst):  \r\n    return [list(ele) for ele in list(zip(*lst))] ", "task_id": 612, "test_setup_code": "", "test_list": ["assert merge([['x', 'y'], ['a', 'b'], ['m', 'n']]) == [['x', 'a', 'm'], ['y', 'b', 'n']]", "assert merge([[1, 2], [3, 4], [5, 6], [7, 8]]) == [[1, 3, 5, 7], [2, 4, 6, 8]]", "assert merge([['x', 'y','z' ], ['a', 'b','c'], ['m', 'n','o']]) == [['x', 'a', 'm'], ['y', 'b', 'n'],['z', 'c','o']]"], "challenge_test_list": []}
{"text": "Write a function to find the maximum value in record list as tuple attribute in the given tuple list.", "code": "def maximum_value(test_list):\r\n  res = [(key, max(lst)) for key, lst in test_list]\r\n  return (res) ", "task_id": 613, "test_setup_code": "", "test_list": ["assert maximum_value([('key1', [3, 4, 5]), ('key2', [1, 4, 2]), ('key3', [9, 3])]) == [('key1', 5), ('key2', 4), ('key3', 9)]", "assert maximum_value([('key1', [4, 5, 6]), ('key2', [2, 5, 3]), ('key3', [10, 4])]) == [('key1', 6), ('key2', 5), ('key3', 10)]", "assert maximum_value([('key1', [5, 6, 7]), ('key2', [3, 6, 4]), ('key3', [11, 5])]) == [('key1', 7), ('key2', 6), ('key3', 11)]"], "challenge_test_list": []}
{"text": "Write a function to find the cumulative sum of all the values that are present in the given tuple list.", "code": "def cummulative_sum(test_list):\r\n  res = sum(map(sum, test_list))\r\n  return (res)", "task_id": 614, "test_setup_code": "", "test_list": ["assert cummulative_sum([(1, 3), (5, 6, 7), (2, 6)]) == 30", "assert cummulative_sum([(2, 4), (6, 7, 8), (3, 7)]) == 37", "assert cummulative_sum([(3, 5), (7, 8, 9), (4, 8)]) == 44"], "challenge_test_list": []}
{"text": "Write a function to find average value of the numbers in a given tuple of tuples.", "code": "def average_tuple(nums):\r\n    result = [sum(x) / len(x) for x in zip(*nums)]\r\n    return result", "task_id": 615, "test_setup_code": "", "test_list": ["assert average_tuple(((10, 10, 10, 12), (30, 45, 56, 45), (81, 80, 39, 32), (1, 2, 3, 4)))==[30.5, 34.25, 27.0, 23.25]", "assert average_tuple(((1, 1, -5), (30, -15, 56), (81, -60, -39), (-10, 2, 3)))== [25.5, -18.0, 3.75]", "assert average_tuple( ((100, 100, 100, 120), (300, 450, 560, 450), (810, 800, 390, 320), (10, 20, 30, 40)))==[305.0, 342.5, 270.0, 232.5]"], "challenge_test_list": []}
{"text": "Write a function to perfom the modulo of tuple elements in the given two tuples.", "code": "def tuple_modulo(test_tup1, test_tup2):\r\n  res = tuple(ele1 % ele2 for ele1, ele2 in zip(test_tup1, test_tup2)) \r\n  return (res) ", "task_id": 616, "test_setup_code": "", "test_list": ["assert tuple_modulo((10, 4, 5, 6), (5, 6, 7, 5)) == (0, 4, 5, 1)", "assert tuple_modulo((11, 5, 6, 7), (6, 7, 8, 6)) == (5, 5, 6, 1)", "assert tuple_modulo((12, 6, 7, 8), (7, 8, 9, 7)) == (5, 6, 7, 1)"], "challenge_test_list": []}
{"text": "Write a function to check for the number of jumps required of given length to reach a point of form (d, 0) from origin in a 2d plane.", "code": "def min_Jumps(a, b, d): \r\n    temp = a \r\n    a = min(a, b) \r\n    b = max(temp, b) \r\n    if (d >= b): \r\n        return (d + b - 1) / b \r\n    if (d == 0): \r\n        return 0\r\n    if (d == a): \r\n        return 1\r\n    else:\r\n        return 2", "task_id": 617, "test_setup_code": "", "test_list": ["assert min_Jumps(3,4,11)==3.5", "assert min_Jumps(3,4,0)==0", "assert min_Jumps(11,14,11)==1"], "challenge_test_list": []}
{"text": "Write a function to divide two lists using map and lambda function.", "code": "def div_list(nums1,nums2):\r\n  result = map(lambda x, y: x / y, nums1, nums2)\r\n  return list(result)", "task_id": 618, "test_setup_code": "", "test_list": ["assert div_list([4,5,6],[1, 2, 3])==[4.0,2.5,2.0]", "assert div_list([3,2],[1,4])==[3.0, 0.5]", "assert div_list([90,120],[50,70])==[1.8, 1.7142857142857142]"], "challenge_test_list": []}
{"text": "Write a function to move all the numbers in it to the given string.", "code": "def move_num(test_str):\r\n  res = ''\r\n  dig = ''\r\n  for ele in test_str:\r\n    if ele.isdigit():\r\n      dig += ele\r\n    else:\r\n      res += ele\r\n  res += dig\r\n  return (res) ", "task_id": 619, "test_setup_code": "", "test_list": ["assert move_num('I1love143you55three3000thousand') == 'Iloveyouthreethousand1143553000'", "assert move_num('Avengers124Assemble') == 'AvengersAssemble124'", "assert move_num('Its11our12path13to14see15things16do17things') == 'Itsourpathtoseethingsdothings11121314151617'"], "challenge_test_list": []}
{"text": "Write a function to find the largest subset where each pair is divisible.", "code": "def largest_subset(a, n):\r\n\tdp = [0 for i in range(n)]\r\n\tdp[n - 1] = 1; \r\n\tfor i in range(n - 2, -1, -1):\r\n\t\tmxm = 0;\r\n\t\tfor j in range(i + 1, n):\r\n\t\t\tif a[j] % a[i] == 0 or a[i] % a[j] == 0:\r\n\t\t\t\tmxm = max(mxm, dp[j])\r\n\t\tdp[i] = 1 + mxm\r\n\treturn max(dp)", "task_id": 620, "test_setup_code": "", "test_list": ["assert largest_subset([ 1, 3, 6, 13, 17, 18 ], 6) == 4", "assert largest_subset([10, 5, 3, 15, 20], 5) == 3", "assert largest_subset([18, 1, 3, 6, 13, 17], 6) == 4"], "challenge_test_list": []}
{"text": "Write a function to increment the numeric values in the given strings by k.", "code": "def increment_numerics(test_list, K):\r\n  res = [str(int(ele) + K) if ele.isdigit() else ele for ele in test_list]\r\n  return res ", "task_id": 621, "test_setup_code": "", "test_list": ["assert increment_numerics([\"MSM\", \"234\", \"is\", \"98\", \"123\", \"best\", \"4\"] , 6) == ['MSM', '240', 'is', '104', '129', 'best', '10']", "assert increment_numerics([\"Dart\", \"356\", \"is\", \"88\", \"169\", \"Super\", \"6\"] , 12) == ['Dart', '368', 'is', '100', '181', 'Super', '18']", "assert increment_numerics([\"Flutter\", \"451\", \"is\", \"44\", \"96\", \"Magnificent\", \"12\"] , 33) == ['Flutter', '484', 'is', '77', '129', 'Magnificent', '45']"], "challenge_test_list": []}
{"text": "Write a function to find the median of two sorted arrays of same size.", "code": "def get_median(arr1, arr2, n):\r\n  i = 0\r\n  j = 0\r\n  m1 = -1\r\n  m2 = -1\r\n  count = 0\r\n  while count < n + 1:\r\n    count += 1\r\n    if i == n:\r\n      m1 = m2\r\n      m2 = arr2[0]\r\n      break\r\n    elif j == n:\r\n      m1 = m2\r\n      m2 = arr1[0]\r\n      break\r\n    if arr1[i] <= arr2[j]:\r\n      m1 = m2\r\n      m2 = arr1[i]\r\n      i += 1\r\n    else:\r\n      m1 = m2\r\n      m2 = arr2[j]\r\n      j += 1\r\n  return (m1 + m2)/2", "task_id": 622, "test_setup_code": "", "test_list": ["assert get_median([1, 12, 15, 26, 38], [2, 13, 17, 30, 45], 5) == 16.0", "assert get_median([2, 4, 8, 9], [7, 13, 19, 28], 4) == 8.5", "assert get_median([3, 6, 14, 23, 36, 42], [2, 18, 27, 39, 49, 55], 6) == 25.0"], "challenge_test_list": []}
{"text": "Write a function to find the n-th power of individual elements in a list using lambda function.", "code": "def nth_nums(nums,n):\r\n nth_nums = list(map(lambda x: x ** n, nums))\r\n return nth_nums", "task_id": 623, "test_setup_code": "", "test_list": ["assert nth_nums([1, 2, 3, 4, 5, 6, 7, 8, 9, 10],2)==[1, 4, 9, 16, 25, 36, 49, 64, 81, 100]", "assert nth_nums([10,20,30],3)==([1000, 8000, 27000])", "assert nth_nums([12,15],5)==([248832, 759375])"], "challenge_test_list": []}
{"text": "Write a python function to convert the given string to upper case.", "code": "def is_upper(string):\r\n  return (string.upper())", "task_id": 624, "test_setup_code": "", "test_list": ["assert is_upper(\"person\") ==\"PERSON\"", "assert is_upper(\"final\") == \"FINAL\"", "assert is_upper(\"Valid\") == \"VALID\""], "challenge_test_list": []}
{"text": "Write a python function to interchange first and last elements in a given list.", "code": "def swap_List(newList): \r\n    size = len(newList) \r\n    temp = newList[0] \r\n    newList[0] = newList[size - 1] \r\n    newList[size - 1] = temp   \r\n    return newList ", "task_id": 625, "test_setup_code": "", "test_list": ["assert swap_List([1,2,3]) == [3,2,1]", "assert swap_List([1,2,3,4,4]) == [4,2,3,4,1]", "assert swap_List([4,5,6]) == [6,5,4]"], "challenge_test_list": []}
{"text": "Write a python function to find the largest triangle that can be inscribed in the semicircle.", "code": "def triangle_area(r) :  \r\n    if r < 0 : \r\n        return -1\r\n    return r * r ", "task_id": 626, "test_setup_code": "", "test_list": ["assert triangle_area(0) == 0", "assert triangle_area(-1) == -1", "assert triangle_area(2) == 4"], "challenge_test_list": []}
{"text": "Write a python function to find the smallest missing number from the given array.", "code": "def find_First_Missing(array,start,end): \r\n    if (start > end): \r\n        return end + 1\r\n    if (start != array[start]): \r\n        return start; \r\n    mid = int((start + end) / 2) \r\n    if (array[mid] == mid): \r\n        return find_First_Missing(array,mid+1,end) \r\n    return find_First_Missing(array,start,mid) ", "task_id": 627, "test_setup_code": "", "test_list": ["assert find_First_Missing([0,1,2,3],0,3) == 4", "assert find_First_Missing([0,1,2,6,9],0,4) == 3", "assert find_First_Missing([2,3,5,8,9],0,4) == 0"], "challenge_test_list": []}
{"text": "Write a function to replace all spaces in the given string with character * list item * list item * list item * list item '%20'.", "code": "MAX=1000;\r\ndef replace_spaces(string):\r\n  string=string.strip()\r\n  i=len(string)\r\n  space_count=string.count(' ')\r\n  new_length = i + space_count*2\r\n  if new_length > MAX:\r\n    return -1\r\n  index = new_length-1\r\n  string=list(string)\r\n  for f in range(i-2, new_length-2):\r\n    string.append('0')\r\n  for j in range(i-1, 0, -1):\r\n    if string[j] == ' ':\r\n      string[index] = '0'\r\n      string[index-1] = '2'\r\n      string[index-2] = '%'\r\n      index=index-3\r\n    else:\r\n      string[index] = string[j]\r\n      index -= 1\r\n  return ''.join(string)", "task_id": 628, "test_setup_code": "", "test_list": ["assert replace_spaces(\"My Name is Dawood\") == 'My%20Name%20is%20Dawood'", "assert replace_spaces(\"I am a Programmer\") == 'I%20am%20a%20Programmer'", "assert replace_spaces(\"I love Coding\") == 'I%20love%20Coding'"], "challenge_test_list": []}
{"text": "Write a python function to find even numbers from a mixed list.", "code": "def Split(list): \r\n    ev_li = [] \r\n    for i in list: \r\n        if (i % 2 == 0): \r\n            ev_li.append(i)  \r\n    return ev_li", "task_id": 629, "test_setup_code": "", "test_list": ["assert Split([1,2,3,4,5]) == [2,4]", "assert Split([4,5,6,7,8,0,1]) == [4,6,8,0]", "assert Split ([8,12,15,19]) == [8,12]"], "challenge_test_list": []}
{"text": "Write a function to extract all the adjacent coordinates of the given coordinate tuple.", "code": "def adjac(ele, sub = []): \r\n  if not ele: \r\n     yield sub \r\n  else: \r\n     yield from [idx for j in range(ele[0] - 1, ele[0] + 2) \r\n                for idx in adjac(ele[1:], sub + [j])] \r\ndef get_coordinates(test_tup):\r\n  res = list(adjac(test_tup))\r\n  return (res) ", "task_id": 630, "test_setup_code": "", "test_list": ["assert get_coordinates((3, 4)) == [[2, 3], [2, 4], [2, 5], [3, 3], [3, 4], [3, 5], [4, 3], [4, 4], [4, 5]]", "assert get_coordinates((4, 5)) ==[[3, 4], [3, 5], [3, 6], [4, 4], [4, 5], [4, 6], [5, 4], [5, 5], [5, 6]]", "assert get_coordinates((5, 6)) == [[4, 5], [4, 6], [4, 7], [5, 5], [5, 6], [5, 7], [6, 5], [6, 6], [6, 7]]"], "challenge_test_list": []}
{"text": "Write a function to replace whitespaces with an underscore and vice versa in a given string by using regex.", "code": "import re\r\ntext = 'Python Exercises'\r\ndef replace_spaces(text):\r\n  text =text.replace (\" \", \"_\")\r\n  return (text)\r\n  text =text.replace (\"_\", \" \")\r\n  return (text)", "task_id": 631, "test_setup_code": "", "test_list": ["assert replace_spaces('Jumanji The Jungle') == 'Jumanji_The_Jungle'", "assert replace_spaces('The Avengers') == 'The_Avengers'", "assert replace_spaces('Fast and Furious') == 'Fast_and_Furious'"], "challenge_test_list": []}
{"text": "Write a python function to move all zeroes to the end of the given list.", "code": "def move_zero(num_list):\r\n    a = [0 for i in range(num_list.count(0))]\r\n    x = [ i for i in num_list if i != 0]\r\n    x.extend(a)\r\n    return (x)", "task_id": 632, "test_setup_code": "", "test_list": ["assert move_zero([1,0,2,0,3,4]) == [1,2,3,4,0,0]", "assert move_zero([2,3,2,0,0,4,0,5,0]) == [2,3,2,4,5,0,0,0,0]", "assert move_zero([0,1,0,1,1]) == [1,1,1,0,0]"], "challenge_test_list": []}
{"text": "Write a python function to find the sum of xor of all pairs of numbers in the given array.", "code": "def pair_OR_Sum(arr,n) : \r\n    ans = 0 \r\n    for i in range(0,n) :    \r\n        for j in range(i + 1,n) :   \r\n            ans = ans + (arr[i] ^ arr[j])          \r\n    return ans ", "task_id": 633, "test_setup_code": "", "test_list": ["assert pair_OR_Sum([5,9,7,6],4) == 47", "assert pair_OR_Sum([7,3,5],3) == 12", "assert pair_OR_Sum([7,3],2) == 4"], "challenge_test_list": []}
{"text": "Write a python function to find the sum of fourth power of first n even natural numbers.", "code": "def even_Power_Sum(n): \r\n    sum = 0; \r\n    for i in range(1,n + 1): \r\n        j = 2*i; \r\n        sum = sum + (j*j*j*j); \r\n    return sum; ", "task_id": 634, "test_setup_code": "", "test_list": ["assert even_Power_Sum(2) == 272", "assert even_Power_Sum(3) == 1568", "assert even_Power_Sum(4) == 5664"], "challenge_test_list": []}
{"text": "Write a function to push all values into a heap and then pop off the smallest values one at a time.", "code": "import heapq as hq\r\ndef heap_sort(iterable):\r\n    h = []\r\n    for value in iterable:\r\n        hq.heappush(h, value)\r\n    return [hq.heappop(h) for i in range(len(h))]", "task_id": 635, "test_setup_code": "", "test_list": ["assert heap_sort([1, 3, 5, 7, 9, 2, 4, 6, 8, 0])==[0, 1, 2, 3, 4, 5, 6, 7, 8, 9]", "assert heap_sort([25, 35, 22, 85, 14, 65, 75, 25, 58])==[14, 22, 25, 25, 35, 58, 65, 75, 85]", "assert heap_sort( [7, 1, 9, 5])==[1,5,7,9]"], "challenge_test_list": []}
{"text": "Write a python function to check if roots of a quadratic equation are reciprocal of each other or not.", "code": "def Check_Solution(a,b,c): \r\n    if (a == c): \r\n        return (\"Yes\"); \r\n    else: \r\n        return (\"No\"); ", "task_id": 636, "test_setup_code": "", "test_list": ["assert Check_Solution(2,0,2) == \"Yes\"", "assert Check_Solution(2,-5,2) == \"Yes\"", "assert Check_Solution(1,2,3) == \"No\""], "challenge_test_list": []}
{"text": "Write a function to check whether the given amount has no profit and no loss", "code": "def noprofit_noloss(actual_cost,sale_amount): \r\n  if(sale_amount == actual_cost):\r\n    return True\r\n  else:\r\n    return False", "task_id": 637, "test_setup_code": "", "test_list": ["assert noprofit_noloss(1500,1200)==False", "assert noprofit_noloss(100,100)==True", "assert noprofit_noloss(2000,5000)==False"], "challenge_test_list": []}
{"text": "Write a function to calculate wind chill index.", "code": "import math\r\ndef wind_chill(v,t):\r\n windchill = 13.12 + 0.6215*t -  11.37*math.pow(v, 0.16) + 0.3965*t*math.pow(v, 0.16)\r\n return int(round(windchill, 0))", "task_id": 638, "test_setup_code": "", "test_list": ["assert wind_chill(120,35)==40", "assert wind_chill(40,70)==86", "assert wind_chill(10,100)==116"], "challenge_test_list": []}
{"text": "Write a function to sum the length of the names of a given list of names after removing the names that start with a lowercase letter.", "code": "def sample_nam(sample_names):\r\n  sample_names=list(filter(lambda el:el[0].isupper() and el[1:].islower(),sample_names))\r\n  return len(''.join(sample_names))", "task_id": 639, "test_setup_code": "", "test_list": ["assert sample_nam(['sally', 'Dylan', 'rebecca', 'Diana', 'Joanne', 'keith'])==16", "assert sample_nam([\"php\", \"res\", \"Python\", \"abcd\", \"Java\", \"aaa\"])==10", "assert sample_nam([\"abcd\", \"Python\", \"abba\", \"aba\"])==6"], "challenge_test_list": []}
{"text": "Write a function to remove the parenthesis area in a string.", "code": "import re\r\ndef remove_parenthesis(items):\r\n for item in items:\r\n    return (re.sub(r\" ?\\([^)]+\\)\", \"\", item))", "task_id": 640, "test_setup_code": "", "test_list": ["assert remove_parenthesis([\"python (chrome)\"])==(\"python\")", "assert remove_parenthesis([\"string(.abc)\"])==(\"string\")", "assert remove_parenthesis([\"alpha(num)\"])==(\"alpha\")"], "challenge_test_list": []}
{"text": "Write a function to find the nth nonagonal number.", "code": "def is_nonagonal(n): \r\n\treturn int(n * (7 * n - 5) / 2) ", "task_id": 641, "test_setup_code": "", "test_list": ["assert is_nonagonal(10) == 325", "assert is_nonagonal(15) == 750", "assert is_nonagonal(18) == 1089"], "challenge_test_list": []}
{"text": "Write a function to remove similar rows from the given tuple matrix.", "code": "def remove_similar_row(test_list):\r\n  res = set([tuple(set(sub)) for sub in test_list])\r\n  return (res) ", "task_id": 642, "test_setup_code": "", "test_list": ["assert remove_similar_row([[(4, 5), (3, 2)], [(2, 2), (4, 6)], [(3, 2), (4, 5)]] ) == {((4, 6), (2, 2)), ((4, 5), (3, 2))}", "assert remove_similar_row([[(5, 6), (4, 3)], [(3, 3), (5, 7)], [(4, 3), (5, 6)]] ) == {((5, 6), (4, 3)), ((5, 7), (3, 3))}", "assert remove_similar_row([[(6, 7), (5, 4)], [(4, 4), (6, 8)], [(5, 4), (6, 7)]] ) =={((5, 4), (6, 7)), ((4, 4), (6, 8))}"], "challenge_test_list": []}
{"text": "Write a function that matches a word containing 'z', not at the start or end of the word.", "code": "import re\r\ndef text_match_wordz_middle(text):\r\n        patterns = '\\Bz\\B'\r\n        if re.search(patterns,  text):\r\n                return 'Found a match!'\r\n        else:\r\n                return('Not matched!')", "task_id": 643, "test_setup_code": "", "test_list": ["assert text_match_wordz_middle(\"pythonzabc.\")==('Found a match!')", "assert text_match_wordz_middle(\"xyzabc.\")==('Found a match!')", "assert text_match_wordz_middle(\"  lang  .\")==('Not matched!')"], "challenge_test_list": []}
{"text": "Write a python function to reverse an array upto a given position.", "code": "def reverse_Array_Upto_K(input, k): \r\n  return (input[k-1::-1] + input[k:]) ", "task_id": 644, "test_setup_code": "", "test_list": ["assert reverse_Array_Upto_K([1, 2, 3, 4, 5, 6],4) == [4, 3, 2, 1, 5, 6]", "assert reverse_Array_Upto_K([4, 5, 6, 7], 2) == [5, 4, 6, 7]", "assert reverse_Array_Upto_K([9, 8, 7, 6, 5],3) == [7, 8, 9, 6, 5]"], "challenge_test_list": []}
{"text": "Write a function to find the product of it\u2019s kth index in the given tuples.", "code": "def get_product(val) : \r\n\tres = 1\r\n\tfor ele in val: \r\n\t\tres *= ele \r\n\treturn res \r\ndef find_k_product(test_list, K):\r\n  res = get_product([sub[K] for sub in test_list])\r\n  return (res) ", "task_id": 645, "test_setup_code": "", "test_list": ["assert find_k_product([(5, 6, 7), (1, 3, 5), (8, 9, 19)], 2) == 665", "assert find_k_product([(6, 7, 8), (2, 4, 6), (9, 10, 20)], 1) == 280", "assert find_k_product([(7, 8, 9), (3, 5, 7), (10, 11, 21)], 0) == 210"], "challenge_test_list": []}
{"text": "Write a python function to count number of cubes of size k in a cube of size n.", "code": "def No_of_cubes(N,K):\r\n    No = 0\r\n    No = (N - K + 1)\r\n    No = pow(No, 3)\r\n    return No", "task_id": 646, "test_setup_code": "", "test_list": ["assert No_of_cubes(2,1) == 8", "assert No_of_cubes(5,2) == 64", "assert No_of_cubes(1,1) == 1"], "challenge_test_list": []}
{"text": "Write a function to split a string at uppercase letters.", "code": "import re\r\ndef split_upperstring(text):\r\n return (re.findall('[A-Z][^A-Z]*', text))", "task_id": 647, "test_setup_code": "", "test_list": ["assert split_upperstring(\"PythonProgramLanguage\")==['Python','Program','Language']", "assert split_upperstring(\"PythonProgram\")==['Python','Program']", "assert split_upperstring(\"ProgrammingLanguage\")==['Programming','Language']"], "challenge_test_list": []}
{"text": "Write a function to exchange the position of every n-th value with (n+1)th value and (n+1)th value with n-th value in a given list.", "code": "from itertools import zip_longest, chain, tee\r\ndef exchange_elements(lst):\r\n    lst1, lst2 = tee(iter(lst), 2)\r\n    return list(chain.from_iterable(zip_longest(lst[1::2], lst[::2])))", "task_id": 648, "test_setup_code": "", "test_list": ["assert exchange_elements([0,1,2,3,4,5])==[1, 0, 3, 2, 5, 4] ", "assert exchange_elements([5,6,7,8,9,10])==[6,5,8,7,10,9] ", "assert exchange_elements([25,35,45,55,75,95])==[35,25,55,45,95,75] "], "challenge_test_list": []}
{"text": "Write a python function to calculate the sum of the numbers in a list between the indices of a specified range.", "code": "def sum_Range_list(nums, m, n):                                                                                                                                                                                                \r\n    sum_range = 0                                                                                                                                                                                                         \r\n    for i in range(m, n+1, 1):                                                                                                                                                                                        \r\n        sum_range += nums[i]                                                                                                                                                                                                  \r\n    return sum_range   ", "task_id": 649, "test_setup_code": "", "test_list": ["assert sum_Range_list([2, 1, 5, 6, 8, 3, 4, 9, 10, 11, 8, 12],8,10) == 29", "assert sum_Range_list([1,2,3,4,5],1,2) == 5", "assert sum_Range_list([1,0,1,2,5,6],4,5) == 11"], "challenge_test_list": []}
{"text": "Write a python function to check whether the given two arrays are equal or not.", "code": "def are_Equal(arr1,arr2,n,m):\r\n    if (n != m):\r\n        return False\r\n    arr1.sort()\r\n    arr2.sort()\r\n    for i in range(0,n - 1):\r\n        if (arr1[i] != arr2[i]):\r\n            return False\r\n    return True", "task_id": 650, "test_setup_code": "", "test_list": ["assert are_Equal([1,2,3],[3,2,1],3,3) == True", "assert are_Equal([1,1,1],[2,2,2],3,3) == False", "assert are_Equal([8,9],[4,5,6],2,3) == False"], "challenge_test_list": []}
{"text": "Write a function to check if one tuple is a subset of another tuple.", "code": "def check_subset(test_tup1, test_tup2):\r\n  res = set(test_tup2).issubset(test_tup1)\r\n  return (res) ", "task_id": 651, "test_setup_code": "", "test_list": ["assert check_subset((10, 4, 5, 6), (5, 10)) == True", "assert check_subset((1, 2, 3, 4), (5, 6)) == False", "assert check_subset((7, 8, 9, 10), (10, 8)) == True"], "challenge_test_list": []}
{"text": "Write a function to flatten the given tuple matrix into the tuple list with each tuple representing each column.", "code": "def matrix_to_list(test_list):\r\n  temp = [ele for sub in test_list for ele in sub]\r\n  res = list(zip(*temp))\r\n  return (str(res))", "task_id": 652, "test_setup_code": "", "test_list": ["assert matrix_to_list([[(4, 5), (7, 8)], [(10, 13), (18, 17)], [(0, 4), (10, 1)]]) == '[(4, 7, 10, 18, 0, 10), (5, 8, 13, 17, 4, 1)]'", "assert matrix_to_list([[(5, 6), (8, 9)], [(11, 14), (19, 18)], [(1, 5), (11, 2)]]) == '[(5, 8, 11, 19, 1, 11), (6, 9, 14, 18, 5, 2)]'", "assert matrix_to_list([[(6, 7), (9, 10)], [(12, 15), (20, 21)], [(23, 7), (15, 8)]]) == '[(6, 9, 12, 20, 23, 15), (7, 10, 15, 21, 7, 8)]'"], "challenge_test_list": []}
{"text": "Write a function to group a sequence of key-value pairs into a dictionary of lists using collections module.", "code": "from collections import defaultdict\r\ndef grouping_dictionary(l):\r\n    d = defaultdict(list)\r\n    for k, v in l:\r\n        d[k].append(v)\r\n    return d", "task_id": 653, "test_setup_code": "", "test_list": ["assert grouping_dictionary([('yellow', 1), ('blue', 2), ('yellow', 3), ('blue', 4), ('red', 1)])== ({'yellow': [1, 3], 'blue': [2, 4], 'red': [1]})", "assert grouping_dictionary([('yellow', 10), ('blue', 20), ('yellow', 30), ('blue', 40), ('red', 10)])== ({'yellow': [10, 30], 'blue': [20, 40], 'red': [10]})", "assert grouping_dictionary([('yellow', 15), ('blue', 25), ('yellow', 35), ('blue', 45), ('red', 15)])== ({'yellow': [15, 35], 'blue': [25, 45], 'red': [15]})"], "challenge_test_list": []}
{"text": "Write a function to find the perimeter of a rectangle.", "code": "def rectangle_perimeter(l,b):\r\n  perimeter=2*(l+b)\r\n  return perimeter", "task_id": 654, "test_setup_code": "", "test_list": ["assert rectangle_perimeter(10,20)==60", "assert rectangle_perimeter(10,5)==30", "assert rectangle_perimeter(4,2)==12"], "challenge_test_list": []}
{"text": "Write a python function to find the sum of fifth power of n natural numbers.", "code": "def fifth_Power_Sum(n) : \r\n    sm = 0 \r\n    for i in range(1,n+1) : \r\n        sm = sm + (i*i*i*i*i) \r\n    return sm ", "task_id": 655, "test_setup_code": "", "test_list": ["assert fifth_Power_Sum(2) == 33", "assert fifth_Power_Sum(4) == 1300", "assert fifth_Power_Sum(3) == 276"], "challenge_test_list": []}
{"text": "Write a python function to find the minimum sum of absolute differences of two arrays.", "code": "def find_Min_Sum(a,b,n): \r\n    a.sort() \r\n    b.sort() \r\n    sum = 0  \r\n    for i in range(n): \r\n        sum = sum + abs(a[i] - b[i]) \r\n    return sum", "task_id": 656, "test_setup_code": "", "test_list": ["assert find_Min_Sum([3,2,1],[2,1,3],3) == 0", "assert find_Min_Sum([1,2,3],[4,5,6],3) == 9", "assert find_Min_Sum([4,1,8,7],[2,3,6,5],4) == 6"], "challenge_test_list": []}
{"text": "Write a python function to find the first digit in factorial of a given number.", "code": "import math \r\ndef first_Digit(n) : \r\n    fact = 1\r\n    for i in range(2,n + 1) : \r\n        fact = fact * i \r\n        while (fact % 10 == 0) :  \r\n            fact = int(fact / 10) \r\n    while (fact >= 10) : \r\n        fact = int(fact / 10) \r\n    return math.floor(fact) ", "task_id": 657, "test_setup_code": "", "test_list": ["assert first_Digit(5) == 1", "assert first_Digit(10) == 3", "assert first_Digit(7) == 5"], "challenge_test_list": []}
{"text": "Write a function to find the item with maximum occurrences in a given list.", "code": "def max_occurrences(list1):\r\n    max_val = 0\r\n    result = list1[0] \r\n    for i in list1:\r\n        occu = list1.count(i)\r\n        if occu > max_val:\r\n            max_val = occu\r\n            result = i \r\n    return result", "task_id": 658, "test_setup_code": "", "test_list": ["assert max_occurrences([2,3,8,4,7,9,8,2,6,5,1,6,1,2,3,4,6,9,1,2])==2", "assert max_occurrences([1, 3,5, 7,1, 3,13, 15, 17,5, 7,9,1, 11])==1", "assert max_occurrences([1, 2, 3,2, 4, 5,1, 1, 1])==1"], "challenge_test_list": []}
{"text": "Write a python function to print duplicants from a list of integers.", "code": "def Repeat(x): \r\n    _size = len(x) \r\n    repeated = [] \r\n    for i in range(_size): \r\n        k = i + 1\r\n        for j in range(k, _size): \r\n            if x[i] == x[j] and x[i] not in repeated: \r\n                repeated.append(x[i]) \r\n    return repeated ", "task_id": 659, "test_setup_code": "", "test_list": ["assert Repeat([10, 20, 30, 20, 20, 30, 40, 50, -20, 60, 60, -20, -20]) == [20, 30, -20, 60]", "assert Repeat([-1, 1, -1, 8]) == [-1]", "assert Repeat([1, 2, 3, 1, 2,]) == [1, 2]"], "challenge_test_list": []}
{"text": "Write a python function to choose points from two ranges such that no point lies in both the ranges.", "code": "def find_Points(l1,r1,l2,r2): \r\n    x = min(l1,l2) if (l1 != l2) else -1\r\n    y = max(r1,r2) if (r1 != r2) else -1\r\n    return (x,y)", "task_id": 660, "test_setup_code": "", "test_list": ["assert find_Points(5,10,1,5) == (1,10)", "assert find_Points(3,5,7,9) == (3,9)", "assert find_Points(1,5,2,8) == (1,8)"], "challenge_test_list": []}
{"text": "Write a function to find the maximum sum that can be formed which has no three consecutive elements present.", "code": "def max_sum_of_three_consecutive(arr, n): \r\n\tsum = [0 for k in range(n)] \r\n\tif n >= 1: \r\n\t\tsum[0] = arr[0] \r\n\tif n >= 2: \r\n\t\tsum[1] = arr[0] + arr[1] \r\n\tif n > 2: \r\n\t\tsum[2] = max(sum[1], max(arr[1] + arr[2], arr[0] + arr[2])) \r\n\tfor i in range(3, n): \r\n\t\tsum[i] = max(max(sum[i-1], sum[i-2] + arr[i]), arr[i] + arr[i-1] + sum[i-3]) \r\n\treturn sum[n-1]", "task_id": 661, "test_setup_code": "", "test_list": ["assert max_sum_of_three_consecutive([100, 1000, 100, 1000, 1], 5) == 2101", "assert max_sum_of_three_consecutive([3000, 2000, 1000, 3, 10], 5) == 5013", "assert max_sum_of_three_consecutive([1, 2, 3, 4, 5, 6, 7, 8], 8) == 27"], "challenge_test_list": []}
{"text": "Write a function to sort a list in a dictionary.", "code": "def sorted_dict(dict1):\r\n  sorted_dict = {x: sorted(y) for x, y in dict1.items()}\r\n  return sorted_dict", "task_id": 662, "test_setup_code": "", "test_list": ["assert sorted_dict({'n1': [2, 3, 1], 'n2': [5, 1, 2], 'n3': [3, 2, 4]})=={'n1': [1, 2, 3], 'n2': [1, 2, 5], 'n3': [2, 3, 4]}", "assert sorted_dict({'n1': [25,37,41], 'n2': [41,54,63], 'n3': [29,38,93]})=={'n1': [25, 37, 41], 'n2': [41, 54, 63], 'n3': [29, 38, 93]}", "assert sorted_dict({'n1': [58,44,56], 'n2': [91,34,58], 'n3': [100,200,300]})=={'n1': [44, 56, 58], 'n2': [34, 58, 91], 'n3': [100, 200, 300]}"], "challenge_test_list": []}
{"text": "Write a function to find the largest possible value of k such that k modulo x is y.", "code": "import sys \r\ndef find_max_val(n, x, y): \r\n\tans = -sys.maxsize \r\n\tfor k in range(n + 1): \r\n\t\tif (k % x == y): \r\n\t\t\tans = max(ans, k) \r\n\treturn (ans if (ans >= 0 and\r\n\t\t\t\t\tans <= n) else -1) ", "task_id": 663, "test_setup_code": "", "test_list": ["assert find_max_val(15, 10, 5) == 15", "assert find_max_val(187, 10, 5) == 185", "assert find_max_val(16, 11, 1) == 12"], "challenge_test_list": []}
{"text": "Write a python function to find the average of even numbers till a given even number.", "code": "def average_Even(n) : \r\n    if (n% 2!= 0) : \r\n        return (\"Invalid Input\") \r\n        return -1  \r\n    sm = 0\r\n    count = 0\r\n    while (n>= 2) : \r\n        count = count+1\r\n        sm = sm+n \r\n        n = n-2\r\n    return sm // count ", "task_id": 664, "test_setup_code": "", "test_list": ["assert average_Even(2) == 2", "assert average_Even(4) == 3", "assert average_Even(100) == 51"], "challenge_test_list": []}
{"text": "Write a python function to shift first element to the end of given list.", "code": "def move_last(num_list):\r\n    a = [num_list[0] for i in range(num_list.count(num_list[0]))]\r\n    x = [ i for i in num_list if i != num_list[0]]\r\n    x.extend(a)\r\n    return (x)", "task_id": 665, "test_setup_code": "", "test_list": ["assert move_last([1,2,3,4]) == [2,3,4,1]", "assert move_last([2,3,4,1,5,0]) == [3,4,1,5,0,2]", "assert move_last([5,4,3,2,1]) == [4,3,2,1,5]"], "challenge_test_list": []}
{"text": "Write a function to count occurrence of a character in a string.", "code": "def count_char(string,char):\r\n count = 0\r\n for i in range(len(string)):\r\n    if(string[i] == char):\r\n        count = count + 1\r\n return count", "task_id": 666, "test_setup_code": "", "test_list": ["assert count_char(\"Python\",'o')==1", "assert count_char(\"little\",'t')==2", "assert count_char(\"assert\",'s')==2"], "challenge_test_list": []}
{"text": "Write a python function to count number of vowels in the string.", "code": "def Check_Vow(string, vowels): \r\n    final = [each for each in string if each in vowels] \r\n    return(len(final)) \r\n", "task_id": 667, "test_setup_code": "", "test_list": ["assert Check_Vow('corner','AaEeIiOoUu') == 2", "assert Check_Vow('valid','AaEeIiOoUu') == 2", "assert Check_Vow('true','AaEeIiOoUu') ==2"], "challenge_test_list": []}
{"text": "Write a python function to replace multiple occurence of character by single.", "code": "import re \r\ndef replace(string, char): \r\n    pattern = char + '{2,}'\r\n    string = re.sub(pattern, char, string) \r\n    return string ", "task_id": 668, "test_setup_code": "", "test_list": ["assert replace('peep','e') == 'pep'", "assert replace('Greek','e') == 'Grek'", "assert replace('Moon','o') == 'Mon'"], "challenge_test_list": []}
{"text": "Write a function to check whether the given ip address is valid or not using regex.", "code": "import re \r\nregex = '''^(25[0-5]|2[0-4][0-9]|[0-1]?[0-9][0-9]?)\\.( \r\n\t\t\t25[0-5]|2[0-4][0-9]|[0-1]?[0-9][0-9]?)\\.( \r\n\t\t\t25[0-5]|2[0-4][0-9]|[0-1]?[0-9][0-9]?)\\.( \r\n\t\t\t25[0-5]|2[0-4][0-9]|[0-1]?[0-9][0-9]?)$'''\r\ndef check_IP(Ip): \r\n\tif(re.search(regex, Ip)): \r\n\t\treturn (\"Valid IP address\") \r\n\telse: \r\n\t\treturn (\"Invalid IP address\") ", "task_id": 669, "test_setup_code": "", "test_list": ["assert check_IP(\"192.168.0.1\") == 'Valid IP address'", "assert check_IP(\"110.234.52.124\") == 'Valid IP address'", "assert check_IP(\"366.1.2.2\") == 'Invalid IP address'"], "challenge_test_list": []}
{"text": "Write a python function to check whether a sequence of numbers has a decreasing trend or not.", "code": "def decreasing_trend(nums):\r\n    if (sorted(nums)== nums):\r\n        return True\r\n    else:\r\n        return False", "task_id": 670, "test_setup_code": "", "test_list": ["assert decreasing_trend([-4,-3,-2,-1]) == True", "assert decreasing_trend([1,2,3]) == True", "assert decreasing_trend([3,2,1]) == False"], "challenge_test_list": []}
{"text": "Write a python function to set the right most unset bit.", "code": "import math \r\ndef get_Pos_Of_Right_most_Set_Bit(n): \r\n    return int(math.log2(n&-n)+1)   \r\ndef set_Right_most_Unset_Bit(n): \r\n    if (n == 0): \r\n        return 1\r\n    if ((n & (n + 1)) == 0):     \r\n        return n \r\n    pos = get_Pos_Of_Right_most_Set_Bit(~n)      \r\n    return ((1 << (pos - 1)) | n) ", "task_id": 671, "test_setup_code": "", "test_list": ["assert set_Right_most_Unset_Bit(21) == 23", "assert set_Right_most_Unset_Bit(11) == 15", "assert set_Right_most_Unset_Bit(15) == 15"], "challenge_test_list": []}
{"text": "Write a function to find maximum of three numbers.", "code": "def max_of_three(num1,num2,num3): \r\n    if (num1 >= num2) and (num1 >= num3):\r\n       lnum = num1\r\n    elif (num2 >= num1) and (num2 >= num3):\r\n       lnum = num2\r\n    else:\r\n       lnum = num3\r\n    return lnum", "task_id": 672, "test_setup_code": "", "test_list": ["assert max_of_three(10,20,30)==30", "assert max_of_three(55,47,39)==55", "assert max_of_three(10,49,30)==49"], "challenge_test_list": []}
{"text": "Write a python function to convert a list of multiple integers into a single integer.", "code": "def convert(list): \r\n    s = [str(i) for i in list] \r\n    res = int(\"\".join(s))  \r\n    return (res) ", "task_id": 673, "test_setup_code": "", "test_list": ["assert convert([1,2,3]) == 123", "assert convert([4,5,6]) == 456", "assert convert([7,8,9]) == 789"], "challenge_test_list": []}
{"text": "Write a function to remove duplicate words from a given string using collections module.", "code": "from collections import OrderedDict\r\ndef remove_duplicate(string):\r\n  result = ' '.join(OrderedDict((w,w) for w in string.split()).keys())\r\n  return result", "task_id": 674, "test_setup_code": "", "test_list": ["assert remove_duplicate(\"Python Exercises Practice Solution Exercises\")==(\"Python Exercises Practice Solution\")", "assert remove_duplicate(\"Python Exercises Practice Solution Python\")==(\"Python Exercises Practice Solution\")", "assert remove_duplicate(\"Python Exercises Practice Solution Practice\")==(\"Python Exercises Practice Solution\")"], "challenge_test_list": []}
{"text": "Write a function to add two integers. however, if the sum is between the given range it will return 20.", "code": "def sum_nums(x, y,m,n):\r\n    sum_nums= x + y\r\n    if sum_nums in range(m, n):\r\n        return 20\r\n    else:\r\n        return sum_nums", "task_id": 675, "test_setup_code": "", "test_list": ["assert sum_nums(2,10,11,20)==20", "assert sum_nums(15,17,1,10)==32", "assert sum_nums(10,15,5,30)==20"], "challenge_test_list": []}
{"text": "Write a function to remove everything except alphanumeric characters from the given string by using regex.", "code": "import re\r\ndef remove_extra_char(text1):\r\n  pattern = re.compile('[\\W_]+')\r\n  return (pattern.sub('', text1))", "task_id": 676, "test_setup_code": "", "test_list": ["assert remove_extra_char('**//Google Android// - 12. ') == 'GoogleAndroid12'", "assert remove_extra_char('****//Google Flutter//*** - 36. ') == 'GoogleFlutter36'", "assert remove_extra_char('**//Google Firebase// - 478. ') == 'GoogleFirebase478'"], "challenge_test_list": []}
{"text": "Write a function to check if the triangle is valid or not.", "code": "def validity_triangle(a,b,c):\r\n total = a + b + c\r\n if total == 180:\r\n    return True\r\n else:\r\n    return False", "task_id": 677, "test_setup_code": "", "test_list": ["assert validity_triangle(60,50,90)==False", "assert validity_triangle(45,75,60)==True", "assert validity_triangle(30,50,100)==True"], "challenge_test_list": []}
{"text": "Write a python function to remove spaces from a given string.", "code": "def remove_spaces(str1):\r\n  str1 = str1.replace(' ','')\r\n  return str1", "task_id": 678, "test_setup_code": "", "test_list": ["assert remove_spaces(\"a b c\") == \"abc\"", "assert remove_spaces(\"1 2 3\") == \"123\"", "assert remove_spaces(\" b c\") == \"bc\""], "challenge_test_list": []}
{"text": "Write a function to access dictionary key\u2019s element by index.", "code": "def access_key(ditionary,key):\r\n  return list(ditionary)[key]", "task_id": 679, "test_setup_code": "", "test_list": ["assert access_key({'physics': 80, 'math': 90, 'chemistry': 86},0)== 'physics'", "assert access_key({'python':10, 'java': 20, 'C++':30},2)== 'C++'", "assert access_key({'program':15,'computer':45},1)== 'computer'"], "challenge_test_list": []}
{"text": "Write a python function to check whether a sequence of numbers has an increasing trend or not.", "code": "def increasing_trend(nums):\r\n    if (sorted(nums)== nums):\r\n        return True\r\n    else:\r\n        return False", "task_id": 680, "test_setup_code": "", "test_list": ["assert increasing_trend([1,2,3,4]) == True", "assert increasing_trend([4,3,2,1]) == False", "assert increasing_trend([0,1,4,9]) == True"], "challenge_test_list": []}
{"text": "Write a python function to find the smallest prime divisor of a number.", "code": "def smallest_Divisor(n): \r\n    if (n % 2 == 0): \r\n        return 2; \r\n    i = 3;  \r\n    while (i*i <= n): \r\n        if (n % i == 0): \r\n            return i; \r\n        i += 2; \r\n    return n; ", "task_id": 681, "test_setup_code": "", "test_list": ["assert smallest_Divisor(10) == 2", "assert smallest_Divisor(25) == 5", "assert smallest_Divisor(31) == 31"], "challenge_test_list": []}
{"text": "Write a function to multiply two lists using map and lambda function.", "code": "def mul_list(nums1,nums2):\r\n  result = map(lambda x, y: x * y, nums1, nums2)\r\n  return list(result)", "task_id": 682, "test_setup_code": "", "test_list": ["assert mul_list([1, 2, 3],[4,5,6])==[4,10,18]", "assert mul_list([1,2],[3,4])==[3,8]", "assert mul_list([90,120],[50,70])==[4500,8400]"], "challenge_test_list": []}
{"text": "Write a python function to check whether the given number can be represented by sum of two squares or not.", "code": "def sum_Square(n) : \r\n    i = 1 \r\n    while i*i <= n : \r\n        j = 1\r\n        while (j*j <= n) : \r\n            if (i*i+j*j == n) : \r\n                return True\r\n            j = j+1\r\n        i = i+1     \r\n    return False", "task_id": 683, "test_setup_code": "", "test_list": ["assert sum_Square(25) == True", "assert sum_Square(24) == False", "assert sum_Square(17) == True"], "challenge_test_list": []}
{"text": "Write a python function to count occurences of a character in a repeated string.", "code": "def count_Char(str,x): \r\n    count = 0\r\n    for i in range(len(str)):  \r\n        if (str[i] == x) : \r\n            count += 1\r\n    n = 10\r\n    repititions = n // len(str)  \r\n    count = count * repititions  \r\n    l = n % len(str)  \r\n    for i in range(l): \r\n        if (str[i] == x):  \r\n            count += 1\r\n    return count  ", "task_id": 684, "test_setup_code": "", "test_list": ["assert count_Char(\"abcac\",'a') == 4", "assert count_Char(\"abca\",'c') == 2", "assert count_Char(\"aba\",'a') == 7"], "challenge_test_list": []}
{"text": "Write a python function to find sum of prime numbers between 1 to n.", "code": "def sum_Of_Primes(n): \r\n    prime = [True] * (n + 1)  \r\n    p = 2\r\n    while p * p <= n: \r\n        if prime[p] == True:  \r\n            i = p * 2\r\n            while i <= n: \r\n                prime[i] = False\r\n                i += p \r\n        p += 1    \r\n    sum = 0\r\n    for i in range (2,n + 1): \r\n        if(prime[i]): \r\n            sum += i \r\n    return sum", "task_id": 685, "test_setup_code": "", "test_list": ["assert sum_Of_Primes(10) == 17", "assert sum_Of_Primes(20) == 77", "assert sum_Of_Primes(5) == 10"], "challenge_test_list": []}
{"text": "Write a function to find the frequency of each element in the given list.", "code": "from collections import defaultdict \r\ndef freq_element(test_tup):\r\n  res = defaultdict(int)\r\n  for ele in test_tup:\r\n    res[ele] += 1\r\n  return (str(dict(res))) ", "task_id": 686, "test_setup_code": "", "test_list": ["assert freq_element((4, 5, 4, 5, 6, 6, 5, 5, 4) ) == '{4: 3, 5: 4, 6: 2}'", "assert freq_element((7, 8, 8, 9, 4, 7, 6, 5, 4) ) == '{7: 2, 8: 2, 9: 1, 4: 2, 6: 1, 5: 1}'", "assert freq_element((1, 4, 3, 1, 4, 5, 2, 6, 2, 7) ) == '{1: 2, 4: 2, 3: 1, 5: 1, 2: 2, 6: 1, 7: 1}'"], "challenge_test_list": []}
{"text": "Write a function to find the greatest common divisor (gcd) of two integers by using recursion.", "code": "def recur_gcd(a, b):\r\n\tlow = min(a, b)\r\n\thigh = max(a, b)\r\n\tif low == 0:\r\n\t\treturn high\r\n\telif low == 1:\r\n\t\treturn 1\r\n\telse:\r\n\t\treturn recur_gcd(low, high%low)", "task_id": 687, "test_setup_code": "", "test_list": ["assert recur_gcd(12,14) == 2", "assert recur_gcd(13,17) == 1", "assert recur_gcd(9, 3) == 3"], "challenge_test_list": []}
{"text": "Write a function to get the length of a complex number.", "code": "import cmath\r\ndef len_complex(a,b):\r\n  cn=complex(a,b)\r\n  length=abs(cn)\r\n  return length", "task_id": 688, "test_setup_code": "", "test_list": ["assert len_complex(3,4)==5.0", "assert len_complex(9,10)==13.45362404707371", "assert len_complex(7,9)==11.40175425099138"], "challenge_test_list": []}
[truncated: 164,387 more chars]
