# Supplementary material
Source: ML conference proceedings conference paper supplement (https://proceedings.neurips.cc/paper_files/paper/2022/hash/89379d5fc6eb34ff98488202fb52b9d0-Abstract.html)
Supplement: Supplementary file 1 [file 89379d5fc6eb34ff98488202fb52b9d0-Supplemental-Conference.zip › supplementary_material/code/simpler_tasks_data_gen/mbpp_token_examples.ipynb]

# %% [code]
%load_ext autoreload
%reload_ext autoreload
%autoreload 2
from IPython.core.display import display, HTML
display(HTML("<style>.container { width:100% !important; }</style>"))
import json
import pandas as pd
import numpy as np
from tasks_with_tokens import *


T5_TOKEN_IDS_FOR_TASKS = tuple(T5_TOKEN_IDS_FOR_TASKS)
def show_task_examples(task, num_examples=10, is_print=False):
    mbpp_sampling_args = {'length_range': (10,40), 'token_ids':T5_TOKEN_IDS_FOR_TASKS[:100]}
    for _ in range(num_examples):
        example = generate_example(TASK_REGISTRY[task], is_natural_language=False, **mbpp_sampling_args)
        if is_print:
            print('----')
            print(example)
            print('INPUT')
            print(example[0])
            print('OUTPUT')
            print(example[1])


for task in MBPP_TASKS:
    print('\n\n================')
    print(f'\n{task}')
#     is_print = True if task=='rearange_string' else False
    show_task_examples(task, num_examples=7, is_print=True)

# %% [code]
rearrange_string(grtidlgl(10, [1,2,3]))


# %% [code]
gen_mbpp_arg_3dic((10,50),[13,222,3111,45234,513,623,734])

# %% [code]
replacement_dic = {'{': '', 
                   '}':'',
                   '(':'',
                   '(': 'WORD_START ',
                   ',):':' COLON ', '):':' COLON ', ')':'', ',':'', '  ':' ', '   ':' ',
                   'WORD_START': str(WORD_START),
                   'COLON': str(COLON),
                    'DIC_SEP': str(DIC_SEP)}

# %% [code]
d1, d2, d3 = gen_mbpp_arg_3dic((20,200),[13,222,3111,45234,512313,623,712341234])


convert_3_dic_to_merge_dictionaries_three_data(d1, d2, d3)
# input_str = (str(d1) + ' DIC_SEP ' + str(d2) + ' DIC_SEP ' + str(d3))
# print(input_str)
# rsrs(input_str, replacement_dic)

# %% [code]
x = gen_remove_fl_occ_data((20,200),[13,222,3111,45234,512313,623,712341234])
print(x)
  
remove_fl_occ(*x)

# %% [code]
sum([47.46666666666667, 47.53333333333333, 47.06666666666667, 47.53333333333333, 47.0, 47.0, 48.199999999999996]) / len([47.46666666666667, 47.53333333333333, 47.06666666666667, 47.53333333333333, 47.0, 47.0, 48.199999999999996])

# %% [code]
words = gen_mbpp_arg_words('count_common',(20,200),[13,222,3111,45234,512313,623,712341234])
words

# %% [code]
rddddd = {'(':'',
         '),':' WORD_DIVIDER',
         ')':'',
         '  ':' ',
         '   ':' ',
         ',':'', 'WORD_DIVIDER':str(WORD_DIVIDER), '[':'', ']':''}

rsrs(str(words), rddddd)

# %% [code]
len(convert_mbpp_words_to_token_data(words))

# %% [code]
count_common(words)

# %% [code]
print(convert_dic_to_token_data(count_common(words)))

# %% [code]
convert
