# Supplementary material
Source: ML conference proceedings conference paper supplement (https://proceedings.neurips.cc/paper_files/paper/2022/hash/89379d5fc6eb34ff98488202fb52b9d0-Abstract.html)
Supplement: Supplementary file 1 [file 89379d5fc6eb34ff98488202fb52b9d0-Supplemental-Conference.zip › supplementary_material/code/simpler_tasks_data_gen/requirements.txt]

absl-py==1.0.0
appnope==0.1.2
argcomplete==1.12.3
argon2-cffi==21.1.0
attrs==21.2.0
backcall==0.2.0
bleach==4.1.0
cachetools==4.2.4
certifi==2021.10.8
cffi==1.15.0
charset-normalizer==2.0.10
click==8.0.3
cycler==0.11.0
debugpy==1.5.1
decorator==5.1.0
defusedxml==0.7.1
dill==0.3.4
entrypoints==0.3
flatbuffers==2.0
fonttools==4.28.2
gast==0.4.0
google-auth==2.3.3
google-auth-oauthlib==0.4.6
google-pasta==0.2.0
googleapis-common-protos==1.54.0
grpcio==1.43.0
h5py==3.6.0
idna==3.3
importlib-metadata==4.8.2
importlib-resources==5.4.0
ipykernel==6.5.1
ipython==7.29.0
ipython-genutils==0.2.0
ipywidgets==7.6.5
jedi==0.18.1
Jinja2==3.0.3
joblib==1.1.0
jsonlines==2.0.0
jsonschema==4.2.1
jupyter==1.0.0
jupyter-client==7.1.0
jupyter-console==6.4.0
jupyter-core==4.9.1
jupyterlab-pygments==0.1.2
jupyterlab-widgets==1.0.2
keras==2.7.0
Keras-Preprocessing==1.1.2
kiwisolver==1.3.2
libclang==12.0.0
Markdown==3.3.6
MarkupSafe==2.0.1
matplotlib==3.5.0
matplotlib-inline==0.1.3
mistune==0.8.4
nbclient==0.5.9
nbconvert==6.3.0
nbformat==5.1.3
nest-asyncio==1.5.1
nltk==3.6.5
notebook==6.4.6
numpy==1.21.4
oauthlib==3.1.1
opt-einsum==3.3.0
