# Supplementary material
Source: ML conference proceedings conference paper supplement (https://proceedings.neurips.cc/paper_files/paper/2022/hash/89379d5fc6eb34ff98488202fb52b9d0-Abstract.html)
Supplement: Supplementary file 1 [file 89379d5fc6eb34ff98488202fb52b9d0-Supplemental-Conference.zip › supplementary_material/code/simpler_tasks_data_gen/scratch.ipynb]

# %% [code]
%load_ext autoreload
%autoreload 2
from IPython.core.display import display, HTML
display(HTML("<style>.container { width:100% !important; }</style>"))

import pandas as pd
import numpy as np
from prototypical_tasks import _str_to_ascii_data, _ascii_data_to_str, _random_partition,  _generate_random_str_list_from_char_set

from prototypical_tasks import *

# %% [code]
random.choices(2,[12,3])

# %% [code]
random.choices(tuple(set(['1','2','3'])), 2)

# %% [code]
generate_random_word_list_from_letters_set(10, set(['1','2','3']))

# %% [code]
list(np.random.randint(4, 10, size=15))

# %% [code]
set(range(0, 10+1))

# %% [code]
import random

# %% [code]
def partition(n):
    x = np.array([random.random() for _ in range(3)])
    sum_x = x.sum()
    result = [int(round(i)) for i in (x / sum_x) * n]
    return result, (x / sum_x) * n, sum(result), sum((x / sum_x) * n)

# %% [code]
partition(10)


# %% [code]
'asdfadsf'.index('g')

# %% [code]
def random_partition(n, k):
    rnd_array = np.random.multinomial(n, np.ones(k)/k, size=1)[0]
    return rnd_array

# %% [code]
0 in random_partition(5,3)

# %% [code]
_random_partition(7, 3)

# %% [code]
_random_partition(7, 3)

# %% [code]
ord('3')

# %% [code]
t = _number_to_ascii(15)
_ascii_data_to_string(t)

# %% [code]
chr(ord('3'))

# %% [code]
_ascii_data_to_string('15')

# %% [code]
def test_longest_word(s):
    

# %% [code]
_random_partition(5, 2)

# %% [code]
_generate_random_str_list_from_char_set(0, [''])


# %% [code]
random.randint(1,0)

# %% [code]
' '.join('a')

# %% [code]
generate_random_str_given_range((3,4),3,5)

# %% [code]
f = lambda x: (x!=0)
list(filter(f, [1,2,0,0,0,3]))


# %% [code]
ord('a')

# %% [code]
ord('z') - ord('a')

# %% [code]


# %% [code]
ord('Z')

# %% [code]
chr(91)

# %% [code]
from pretraining_datasetgen.

# %% [markdown]
# mbpp 13

# %% [code]
d = {"text": "Write a function to count the most common words in a dictionary.", "code": "from collections import Counter\r\ndef count_common(words):\r\n  word_counts = Counter(words)\r\n  top_four = word_counts.most_common(4)\r\n  return (top_four)\r\n", "task_id": 13, "test_setup_code": "", "test_list": ["assert count_common(['red','green','black','pink','black','white','black','eyes','white','black','orange','pink','pink','red','red','white','orange','white',\"black\",'pink','green','green','pink','green','pink','white','orange',\"orange\",'red']) == [('pink', 6), ('black', 5), ('white', 5), ('red', 4)]", "assert count_common(['one', 'two', 'three', 'four', 'five', 'one', 'two', 'one', 'three', 'one']) == [('one', 4), ('two', 2), ('three', 2), ('four', 1)]", "assert count_common(['Facebook', 'Apple', 'Amazon', 'Netflix', 'Google', 'Apple', 'Netflix', 'Amazon']) == [('Apple', 2), ('Amazon', 2), ('Netflix', 2), ('Facebook', 1)]"], "challenge_test_list": []}

# %% [code]
d.keys()

# %% [code]
print(d['code'])

# %% [code]
for x in d['test_list']:
    print(x)

# %% [markdown]
