# Supplementary material
Source: ML conference proceedings conference paper supplement (https://proceedings.neurips.cc/paper_files/paper/2022/hash/89379d5fc6eb34ff98488202fb52b9d0-Abstract.html)
Supplement: Supplementary file 1 [file 89379d5fc6eb34ff98488202fb52b9d0-Supplemental-Conference.zip › supplementary_material/code/simpler_tasks_data_gen/scratch_lime.ipynb]

# %% [code]
import string
import random
%load_ext autoreload
%reload_ext autoreload
%autoreload 2

# %% [code]
x = string.ascii_uppercase + string.ascii_lowercase+','+'<sep>'

# %% [code]


# %% [code]
len(x)

# %% [code]
random.sample([1,2,3])

# %% [code]
random.randint(5,5)

# %% [code]


# %% [code]
from lime_datagen.generate_data import gen_one_lime_data
from prototypical_tasks import UPPER_AND_LOWER_LETTERS

# %% [code]
len(UPPER_AND_LOWER_LETTERS)

# %% [code]
gen_one_lime_data('induct',(0,500),UPPER_AND_LOWER_LETTERS,(10,10),(4,4),1,1,50)

# %% [code]


# %% [code]


# %% [code]
