# Supplementary material
Source: ML conference proceedings conference paper supplement (https://proceedings.neurips.cc/paper_files/paper/2022/hash/89379d5fc6eb34ff98488202fb52b9d0-Abstract.html)
Supplement: Supplementary file 1 [file 89379d5fc6eb34ff98488202fb52b9d0-Supplemental-Conference.zip › supplementary_material/code/simpler_tasks_data_gen/scratch_mbpp.ipynb]

# %% [code]
%load_ext autoreload
%reload_ext autoreload
%autoreload 2
from IPython.core.display import display, HTML
display(HTML("<style>.container { width:100% !important; }</style>"))
import json
import pandas as pd
import numpy as np
from prototypical_tasks import *
from prototypical_tasks import _data_to_str, _str_to_data
from prototypical_tasks import UPPER_AND_LOWER_LETTERS

# %% [code]
import json
import glob

# %% [code]
glob.glob('*.json*')[0]

# %% [code]
with open('mbpp.jsonl', 'r') as json_file:
    json_list = list(json_file)

mbpp_data = []
for json_str in json_list:
    mbpp_data.append(json.loads(json_str))

# %% [code]


# %% [code]
def pnl():
    print('\n')
def show_mbpp_data(n):
    print('\n==========================\n')
    data = mbpp_data[n-1]
    task_id = data['task_id']
    print(f'task id: {task_id}')

#     print(data)
    print(data['text'])
    pnl()

    print(data['code'])
    pnl()
    print(data['test_list'][0])
    pnl()

    print(data['test_list'][1])
    

# %% [code]
tony_mbpp_tasks = [9,11,13,15,39,87]

# %% [code]
from prototypical_tasks import *
from prototypical_tasks import TASK_REGISTRY, gen_mbpp_arg_words, UPPER_AND_LOWER_LETTERS, gen_mbpp_arg_str_arg_ch, gen_mbpp_arg_3dic

# %% [code]
for task in MBPP_TASKS:
    print(task)
    print(gen_mbpp_data(TASK_REGISTRY[task], (0,100000), UPPER_AND_LOWER_LETTERS))

# %% [code]
gen_mbpp_arg_3dic((100,512), UPPER_AND_LOWER_LETTERS)

# %% [code]
print(str({1:332,4:32})+ str({1:332,4:32}))

# %% [code]
gen_mbpp_arg_str_arg_ch((100,512), UPPER_AND_LOWER_LETTERS)

# %% [code]
gen_mbpp_arg_words(TASK_REGISTRY['count_common'], (100,512), UPPER_AND_LOWER_LETTERS)

# %% [code]
[show_mbpp_data(x) for x in tony_mbpp_tasks]

# %% [markdown]
possible args:  
* str
* str ch
* words
* 

# %% [code]


# %% [code]
