# Supplementary material
Source: ML conference proceedings conference paper supplement (https://proceedings.neurips.cc/paper_files/paper/2022/hash/89379d5fc6eb34ff98488202fb52b9d0-Abstract.html)
Supplement: Supplementary file 1 [file 89379d5fc6eb34ff98488202fb52b9d0-Supplemental-Conference.zip › supplementary_material/code/simpler_tasks_data_gen/scratch_summarization.ipynb]

# %% [code]
%load_ext autoreload
%reload_ext autoreload
%autoreload 2
from IPython.core.display import display, HTML
display(HTML("<style>.container { width:100% !important; }</style>"))
import json
import pandas as pd
import numpy as np
from prototypical_tasks import *
from prototypical_tasks import _data_to_str, _str_to_data
from prototypical_tasks import UPPER_AND_LOWER_LETTERS

# %% [markdown]
* Original paper code data gen params: 
    * mean_numsents=10 -> "sampling uniformly from 7 to 13 sentences"
    * mean_sentlen=10 -> "sampling uniformly from 5 to 15 words" 
* My code additional params
    * length_range
        * Does not affect actual data sampling. Code just resamples until it gets data whose input has number of nonspace chars within length_range[0] and length_range[1] inclusive.
        * Example: if length_range = (0,512), no generated data will be greater than 512 
    * vocab_size, chars_per_word, char_set
        * In original paper code, sentences consist of words from vocabulary of size (vocab_size=5000) with (chars_per_word=3) chars per word. The vocabulary is: "first 5000 3-letter character combinations using the English alphabet in lexical order starting from the right (aaa, baa, caa, ..., aab, bab, ...)"
        * char_set = possible chars that words could consist of. 
        * In original paper code, words consist of lower case letters only
    * In my code, if vocab_size chars_per_word and char_set are all not None, then the data is such that:
        * Sentences consist of words from vocabulary of size (vocab_size) with (chars_per_word) chars per word
        * Each word in the vocabulary is  made by randomly sampling chars from char_set


# %% [code]
from prototypical_tasks import summarization_tasks

# %% [code]
summarization_tasks

# %% [code]
from summarization_tasks_datagen.ourtasks import gen_one_summ_data, GENERATOR, BaseGenerator
GENERATOR = BaseGenerator()
for t in summarization_tasks:
    print('\n')
    print(t)
#     d = gen_one_summ_data(t, (0,512), UPPER_AND_LOWER_LETTERS, 500, 4, 10, 10)
    d = gen_one_summ_data(t, (0,512), None, None, None, 10, 10)

    print('___')
    print(d[0])
    print('___')
    print(d[1])
    

# %% [code]
d[0].replace(' ', '')

# %% [code]
' '.join(d[0])

# %% [code]
