# Supplementary material
Source: ML conference proceedings conference paper supplement (https://proceedings.neurips.cc/paper_files/paper/2022/hash/89379d5fc6eb34ff98488202fb52b9d0-Abstract.html)
Supplement: Supplementary file 1 [file 89379d5fc6eb34ff98488202fb52b9d0-Supplemental-Conference.zip › supplementary_material/code/simpler_tasks_data_gen/summarization_tasks_datagen/vocab.py]

import numpy as np
import os
import random
# from transformers import T5Tokenizer

class RandomVocab():
    def __init__(self, vocab_size = 5000):
        char_slots = np.ceil(np.log(vocab_size)/np.log(26))
        char_slots = int(char_slots)
        assert char_slots>0

        vocab = []
        for i in range(vocab_size):
            out=""
            val=i
            for j in range(char_slots):
                rem = val%26
                character = chr(97+rem)
                out = out + character
                val = int(val/26)

            vocab.append(out)

        assert len(set(vocab))==vocab_size
        self.tokens = vocab


class PretrainedT5Vocab():
    def __init__(self):
        tokenizer = T5Tokenizer.from_pretrained('t5-base')
        tokens = tokenizer.convert_ids_to_tokens(range(32000))
        tokens = tokens[3:]          # first 3 are ['<pad>', '</s>', '<unk>']
        self.tokens = tokens


class CustomVocab():
    def __init__(self, chars:list, vocab_size, chars_per_word):

        # char_slots = np.ceil(np.log(vocab_size)/np.log(len(chars)))
        # char_slots = int(char_slots)
        # assert char_slots>0

        def sample_str(chars, len):
            return ''.join(random.choices(chars, k=len))

        vocab = set()
        while len(vocab) < vocab_size:
            word = sample_str(chars, chars_per_word)
            while word in vocab:
                word = sample_str(chars, chars_per_word)
            vocab.add(word)

        assert len(vocab)==vocab_size
        self.tokens = list(vocab)
