# Supplementary material
Source: ML conference proceedings conference paper supplement (https://proceedings.neurips.cc/paper_files/paper/2022/hash/89379d5fc6eb34ff98488202fb52b9d0-Abstract.html)
Supplement: Supplementary file 1 [file 89379d5fc6eb34ff98488202fb52b9d0-Supplemental-Conference.zip › supplementary_material/code/simpler_tasks_data_gen/t5vocab_scratch.ipynb]

# %% [code]
%load_ext autoreload
%reload_ext autoreload
%autoreload 2
from IPython.core.display import display, HTML
display(HTML("<style>.container { width:100% !important; }</style>"))

# %% [code]
import tasks_with_tokens as mmm

# %% [code]
for i in range(1000):
    x = mmm._gen_rand_token_id_list_given_length_range((5,100),mmm.TASKS_TOKEN_IDS)

# %% [code]
#mmm.gen_rand_token_id_list_given_length_range((5,100),mmm.TASKS_TOKEN_IDS)
cs = mmm.TASKS_TOKEN_IDS
print(mmm._generate_deduplicate_data((5,100),cs, True))

# %% [code]
import seqio
DEFAULT_SPM_PATH = "gs://t5-data/vocabs/cc_all.32000/sentencepiece.model"  # GCS
DEFAULT_EXTRA_IDS = 100
vocabulary = seqio.SentencePieceVocabulary(DEFAULT_SPM_PATH, DEFAULT_EXTRA_IDS)
tokenizer = vocabulary.tokenizer

# %% [markdown]
# PAD, EOS TOKEN IDs

# %% [code]
tokenizer.decode_ids()

# %% [code]
print(dir(tokenizer))
print(tokenizer.piece_to_id('▁<extra_id_1>'))

tokenizer.set_vocabulary(['a'])

# %% [code]
tokenizer.encode('a')

# %% [code]
print(tokenizer.vocab_size())
print(len(tokenizer))

# %% [code]
print(tokenizer.pad_id())
print(tokenizer.eos_id())

# %% [code]
print(tokenizer.decode(mmm.generate_longest_word_data((5,100),cs)))

# %% [code]
lwd = mmm.generate_longest_word_data((5,100),list(range(1,10)))
print(lwd)
print(mmm.longest_word(lwd))

# %% [code]
tokenizer.id_to_piece(8546)

# %% [code]
len(tokenizer)

# %% [code]
mmm.deduplicate([1,1,2,2,3,2,2,2,2,3])

# %% [code]
mmm._test_set_task()

# %% [code]


# %% [code]
tokenizer.encode('asdf <extra_id_0>hello')

# %% [code]
tokenizer.id_to_piece(32099)

# %% [code]
print(dir(tokenizer))

# %% [code]
tokenizer.encode('hello')

# %% [code]
tokenizer.eos_id()

# %% [code]
tokenizer.id_to_piece(21820)

# %% [code]
tokenizer.piece_to_id('▁hello')

# %% [code]
tokenizer.piece_to_id('.a')

# %% [code]
tokenizer.piece_to_id('▁')

# %% [code]
tokenizer.piece_to_id('_')

# %% [code]
divider_id = tokenizer.piece_to_id('▁<extra_id_1>')


# %% [code]
divider_id

# %% [code]
print(dir(tokenizer))

# %% [code]

def get_tokens(tokenizer, i, j):
    t = tokenizer
    return [t.id_to_piece(x) for x in range(i,j)]
all_tokens = get_tokens(tokenizer,0,32100)
print(all_tokens)

# %% [code]
list(filter(lambda x: 'h' in x and len(x)==1, all_tokens))

# %% [code]
list(filter(lambda x: 'e' in x and len(x)==1, all_tokens))

# %% [code]
list(filter(lambda x: 'l' in x and len(x)==1, all_tokens))

# %% [code]
list(filter(lambda x: 'l' in x and len(x)==1, all_tokens))

# %% [code]
list(filter(lambda x: 'o' in x and len(x)==1, all_tokens))

# %% [code]
list(filter(lambda x: 'hello' in x, all_tokens))

# %% [markdown]
# IMPORTANT ISSUE

# %% [code]
tmp1 = ['h','e','l','l','o']
tmp2 = ['_hello']
tokenizer.piece_to_id(['h','e','l','l','o'])

# %% [code]
tokenizer.piece_to_id('_hello')

# %% [code]
tokenizer.piece_to_id('hello')

# %% [code]
tokenizer.piece_to_id('asdfsdffsdfsdfsdfsfsdfds')

# %% [code]


# %% [code]
tokenizer.decode([107, 15, 40, 40, 32])

# %% [code]
tokenizer.decode([107, 15, 40, 40, 32])

# %% [code]
tokenizer.id_to_piece(21820)

# %% [code]
tokenizer.decode(21820)

# %% [markdown]
![image.png](attachment:image.png)

# %% [code]
DEFAULT_SPM_PATH = "gs://t5-data/vocabs/cc_all.32000/sentencepiece.model"  # GCS
DEFAULT_EXTRA_IDS = 100

# %% [code]
tokenizer.encode('you with asdafda')

# %% [code]
tokenizer.encode('asdafda')

# %% [code]
tokenizer.encode('asdafda')

# %% [code]
tokenizer.encode('copy')

# %% [code]


# %% [code]
tokenizer.decode([38, 26, 9, 3, 89, 26, 9])

# %% [code]
vocabulary = seqio.SentencePieceVocabulary(DEFAULT_SPM_PATH, DEFAULT_EXTRA_IDS)
tokenizer = vocabulary.tokenizer

# %% [code]
for x in all_tokens:
    if ' ' in x:
        print(x)

# %% [code]
for x in all_tokens:
    if '_' in x:
        print(x)

# %% [code]
tokenizer.encode('_')

# %% [code]
tokenizer.decode_id(834)

# %% [code]
tokenizer.decode_ids([0]) == tokenizer.decode_ids([1])

# %% [code]


# %% [code]
tokenizer.decode_ids([3,834])

# %% [code]
print([])

# %% [code]
type(tokenizer)

# %% [markdown]
![image.png](attachment:image.png)

# %% [code]
dir(tokenizer)

# %% [code]
tokenizer = vocabulary.tokenizer

# %% [code]
len(tokenizer)

# %% [code]
print([tokenizer.decode([x]) for x in range(31900, 32100)])

# %% [code]
%load_ext autoreload
%reload_ext autoreload
%autoreload 2
from IPython.core.display import display, HTML
display(HTML("<style>.container { width:100% !important; }</style>"))
import json
import pandas as pd
import numpy as np
from prototypical_tasks import *
from prototypical_tasks import _data_to_str, _str_to_data


def show_sample_examples(func, num_examples=10, length_range=(2, 30), char_set=UPPER_AND_LOWER_LETTERS):
    for _ in range(num_examples):
        print(func(length_range=length_range, char_set=char_set))
        
BASIC_TASKS = ['copy', 'reverse', 'set', 'first_char', 'last_char', 'deduplicate', 'length', 
       'longest_word', 'duplicate', 'count', 'delete', 'filter', 
       'get_index', 'search', 'sort', 'replace', 'replace_many', 'union', 'intersect', 'set_1_minus_2', 'set_2_minus_1']


def show_task_examples(task, is_natural_language=False, num_examples=10):
    for count in range(num_examples):
        
        basic_task_sampling_args = {'length_range': (4,30), 'char_set':UPPER_AND_LOWER_LETTERS}
        example = generate_example(TASK_REGISTRY[task], is_natural_language=is_natural_language, **basic_task_sampling_args)
        if count % 100_000==0:
            print(count)
        if task == 'longest_word':
            print(f'@input = {example[0]}')
            print(f'output = {example[1]}')
        else:
            print(example)
#             if len(example[1]) == 0 or example[1].isspace():
#                 print(example[1])
#                 raise RuntimeError()

for task in BASIC_TASKS:
# for task in ['get_index']:
    print(f'\n{task}')
    show_task_examples(task, num_examples=20)

# %% [code]
import random
random.sample([1,2,3],k=100)

# %% [code]
len('   ')

# %% [code]
'    '.isspace()

# %% [code]
for func in SAMPLING_FUNCTIONS:
    print(f'\n{func.__name__}')
    show_sample_examples(func, 10)

# %% [code]
# for task in BASIC_TASKS:
for task in ['replace_many']:
    print(f'\n{task}')
    show_task_examples(task, num_examples=2)

# %% [code]
from prototypical_tasks import deduplicate
deduplicate('h h h')

# %% [code]
deduplicate('v d V V r q v d V r q')

# %% [code]
from prototypical_tasks import generate_batch_examples
for task in ["deduplicate"]:
    generate_batch_examples(task=TASK_REGISTRY[task], num_examples=1_000_000, is_natural_language=False, task_config_str="count2_30", length_range=(2, 30), char_set=UPPER_AND_LOWER_LETTERS)


# %% [code]
for task in ["deduplicate"]:
    generate_batch_examples(task=TASK_REGISTRY[task], num_examples=50, is_natural_language=False, task_config_str="count2_30", length_range=(2, 30), char_set=UPPER_AND_LOWER_LETTERS)


# %% [code]
with open('lime_datasets/deduplicate/count2_30_0M.txt', 'r') as f:
    for c, l in enumerate(f):
        print(c)
        print(l[:-1])
        print(l[:-1].replace('\t', '____________________'))


# %% [code]
