# Supplementary material
Source: ML conference proceedings conference paper supplement (https://proceedings.neurips.cc/paper_files/paper/2022/hash/89379d5fc6eb34ff98488202fb52b9d0-Abstract.html)
Supplement: Supplementary file 1 [file 89379d5fc6eb34ff98488202fb52b9d0-Supplemental-Conference.zip › supplementary_material/code/simpler_tasks_data_gen/tasks_with_tokens.py]

import abc
from lib2to3.pytree import convert
import os
import os.path as osp
import numpy as np
import random
import collections
from argparse import Namespace
import seqio
from collections import namedtuple

from numpy.random.mtrand import rand

TASK_REGISTRY = {}
Task = namedtuple("Task", ['name', 'description', 'sampling_fn', 'fn', 'unary'])
SAMPLING_FUNCTIONS = []

DEFAULT_SPM_PATH = "gs://t5-data/vocabs/cc_all.32000/sentencepiece.model"  # GCS
DEFAULT_EXTRA_IDS = 100
VOCABULARY = seqio.SentencePieceVocabulary(DEFAULT_SPM_PATH, DEFAULT_EXTRA_IDS)
TOKENIZER = VOCABULARY.tokenizer

ADD_TO_OUTPUT_IF_OUTPUT_EMPTY =  TOKENIZER.piece_to_id('▁<extra_id_3>')
ARG_DIVIDER =  TOKENIZER.piece_to_id('▁<extra_id_2>')
WORD_DIVIDER = TOKENIZER.piece_to_id('▁<extra_id_1>')
TASK_NAME_INPUT_DIVIDER = TOKENIZER.piece_to_id('▁<extra_id_0>')

# MBPP SPECIAL TOKENS
### MERGE 3 DIC
COLON =  TOKENIZER.piece_to_id('▁<extra_id_10>')
WORD_START = TOKENIZER.piece_to_id('▁<extra_id_11>')
DIC_SEP = TOKENIZER.piece_to_id('▁<extra_id_12>')


T5_TOKEN_IDS_FOR_TASKS = set(range(len(TOKENIZER)-100))
T5_TOKEN_IDS_FOR_TASKS.difference_update(
  [TOKENIZER.eos_id(), TOKENIZER.bos_id(), TOKENIZER.pad_id()])

ALL_T5_TOKEN_IDS = list(range(TOKENIZER.vocab_size()))
EXTRA_IDS = ALL_T5_TOKEN_IDS[-DEFAULT_EXTRA_IDS:]


### util functions ###
def replace_string_lst1_words_with_lst2_words(s, lst1, lst2):
  assert len(lst1) == len(lst2)
  for w1, w2 in zip(lst1, lst2):
    s = s.replace(w1, w2)
  return s


def _random_partition(n, k):
  """
  Return random partition n with k parts
	Example: (7,3) -> [2,4,1]
	"""
  result = np.random.multinomial(n, np.ones(k)/k, size=1)[0]
  result = [int(i) for i in result]
  return result


def _random_partition_no_zeros(n, k):
  """
  Return random partition n with k nonzero parts
	Example: (7,3) -> [2,4,1]
	"""
  result = np.random.multinomial(n - k, np.ones(k)/k, size=1)[0] + np.ones(k)
  result = [int(i) for i in result]
  return result

def _get_char_set(low=ord('A'), high=ord('Z')):
  return set([str(i) for i in range(low, high+1)])


### sampling functions ###

# def _generate_random_str_list_given_length(length, char_set):
#   return [str(i) for i in random.choices(tuple(char_set), k=length)]

# def _generate_random_str_given_length(length, char_set):
#   return " ".join(_generate_random_str_list_given_length(length, char_set))

# def generate_random_str_given_range(length_range, char_set):
#   seq_len = random.randint(*length_range)
#   return _generate_random_str_given_length(seq_len, char_set)
# SAMPLING_FUNCTIONS.append(generate_random_str_given_range)

def _gen_rand_token_id_list_given_length(length, token_ids):
  # real_length = -111
  # while real_length != length:
  #   lst = random.choices(tuple(token_ids), k=length)
  #   lst = TOKENIZER.encode(TOKENIZER.decode(lst))
  #   real_length = len(lst)
  # #   print('!')
  # # print('----')
  # return lst
  return random.choices(token_ids, k=length)

def gen_rand_token_id_list_given_length_range(length_range, token_ids):
  length = random.randint(*length_range)
  lst = _gen_rand_token_id_list_given_length(length, token_ids)
  assert len(lst) == length
  return lst

def generate_count_data(length_range, token_ids):
  if length_range[0]<=2:
    raise RuntimeError("NEED LENGTH_RANGE[0]>2 IN ORDER TO GENERATE COUNT DATA")

  # subtract by 2 so final length of {seq <sep> query_char} is within length range
  seq_char_count = random.randint(length_range[0]-2, length_range[1]-2)
  # char_set = char_set.copy()
  query = random.choice(token_ids)
  query_char_count = random.randint(0, seq_char_count)
  maybe_not_query_char_count = seq_char_count - query_char_count

  # char_set.discard(query)
  data_list = [query]*query_char_count \
              + _gen_rand_token_id_list_given_length(maybe_not_query_char_count, token_ids)
  random.shuffle(data_list)
  return data_list, [query]
SAMPLING_FUNCTIONS.append(generate_count_data)


def _generate_deduplicate_data(length_range, token_ids, is_shuffle, list_chars_to_dup = None, fixed_data_character_count=None):
  # enc_dec_data = None
  data = []
  # while enc_dec_data != data:
  if fixed_data_character_count is None:
    data_char_count = random.randint(*length_range)
  else: 
    data_char_count = fixed_data_character_count
  if data_char_count == 0:
    return ''
    
  # token_ids = token_ids.copy()
  if list_chars_to_dup is None:
    num_parts = random.randint(1, data_char_count)
    partition = _random_partition_no_zeros(data_char_count, num_parts)
    num_parts_length_seq = _gen_rand_token_id_list_given_length(num_parts, token_ids)
  else:
    num_parts = len(list_chars_to_dup)
    partition = _random_partition_no_zeros(data_char_count, num_parts)
    num_parts_length_seq = random.choices(list_chars_to_dup, k=num_parts)
  data = []

  for i, part in enumerate(partition):
    data += [num_parts_length_seq[i]] * part

  if is_shuffle:
    random.shuffle(data)
  assert 0 not in partition
  assert sum(partition) == data_char_count
  assert len(data) == data_char_count

  # enc_dec_data = TOKENIZER.encode(TOKENIZER.decode(data))

  # data = ' '.join(data)
  return data


def generate_deduplicate_data(length_range, token_ids):
  return _generate_deduplicate_data(length_range, token_ids, False)
SAMPLING_FUNCTIONS.append(generate_deduplicate_data)


def generate_set_data(length_range, token_ids):
  return _generate_deduplicate_data(length_range, token_ids, True)
SAMPLING_FUNCTIONS.append(generate_set_data)


def generate_longest_word_data(length_range, token_ids):
  assert length_range[0] >= 1
  # min word length = 1
  # num_spaces = num_words - 1 
  # words are separated by DIVIDER_1_ID
  # ----> max_num_words + (max_num_words - 1) = length_range[1]
  max_num_words = int(length_range[1]/2)
  num_words = random.randint(1, max_num_words)
  num_space = num_words - 1

  max_num_not_space = length_range[1] - num_space
  min_num_not_space = max(length_range[0] - num_space, num_words)
  num_not_space = random.randint(min_num_not_space, max_num_not_space)

  space = WORD_DIVIDER

  data = []
  word_lengths = _random_partition_no_zeros(num_not_space, num_words)
  for i, wl in enumerate(word_lengths):
    data += _gen_rand_token_id_list_given_length(wl, token_ids)
    if i < num_space:
      data += [space]
  return data
SAMPLING_FUNCTIONS.append(generate_longest_word_data)


def generate_at_least_one_query_in_seq_data(length_range, token_ids, query_seq_max_proportion):
  # max_total_chars = length_range[1] - 1 because max_total_chars doesn't count the <sep> token
  max_total_chars = length_range[1] - 1 
  # max_total_chars = seq chars + query chars 
  # max_q/qs_max_prop + max_q = max_total_chars
  # ---> max_q = max_total_chars / (1 + 1/qs_max_prop)
  max_query_length = int(max_total_chars / (1 + 1/query_seq_max_proportion))
  query_char_count = random.randint(1, max_query_length)
  seq_char_count = random.randint(query_char_count / query_seq_max_proportion, max_total_chars - query_char_count)
  # char_set = char_set.copy()
  query = _gen_rand_token_id_list_given_length(query_char_count, token_ids)
  num_query_occurences = random.randint(1, int(seq_char_count / query_char_count))
  not_query_char_count = seq_char_count - num_query_occurences * query_char_count
  assert not_query_char_count >= 0
  seq = []
  partition = _random_partition(not_query_char_count, num_query_occurences+1)
  assert sum(partition) == not_query_char_count
  for i, part in enumerate(partition):
    seq += _gen_rand_token_id_list_given_length(part, token_ids)
    if i < num_query_occurences:
      seq += query
  assert len(seq) == seq_char_count
  return seq, query


def generate_filter_data(length_range, token_ids, query_seq_max_proportion=0.5):
  if random.uniform(0, 1) > 0.25:
    return generate_at_least_one_query_in_seq_data(length_range, token_ids, query_seq_max_proportion )
  else:
    return generate_no_query_in_seq_data(length_range, token_ids)


def generate_delete_data(length_range, token_ids, query_seq_max_proportion=0.5):
  if random.uniform(0, 1) > 0.25:
    return generate_at_least_one_query_in_seq_data(length_range, token_ids, query_seq_max_proportion )
  else:
    return generate_no_query_in_seq_data(length_range, token_ids)


def generate_get_index_data(length_range, token_ids, query_seq_max_proportion=0.5):
  if random.uniform(0, 1) > 0.25:
    return generate_at_least_one_query_in_seq_data(length_range, token_ids, query_seq_max_proportion )
  else:
    return generate_no_query_in_seq_data(length_range, token_ids)
SAMPLING_FUNCTIONS.extend([generate_delete_data, generate_get_index_data])


def generate_no_query_in_seq_data(length_range, token_ids):
  # 1% chance sample data with query length > seq length
  propor_query_len_gt_seq_len = 0.01
  if random.uniform(0, 1) < propor_query_len_gt_seq_len:
    query_char_count = random.randint(length_range[0] + 1, length_range[1])
    query = gen_rand_token_id_list_given_length_range((query_char_count, query_char_count), token_ids)
    seq_char_count = random.randint(0, query_char_count - 1)
    seq = gen_rand_token_id_list_given_length_range((seq_char_count, seq_char_count), token_ids)
    return seq, query
  
  # remaining chance sample data with query length <= seq length
  seq_char_count = random.randint(*length_range)
  query_char_count = random.randint(length_range[0], seq_char_count)
  query = gen_rand_token_id_list_given_length_range((query_char_count, query_char_count), token_ids)
  seq = gen_rand_token_id_list_given_length_range((seq_char_count, seq_char_count), token_ids)
  while str(query)[1:-1] in str(seq):
    query = gen_rand_token_id_list_given_length_range((query_char_count, query_char_count), token_ids)
    seq = gen_rand_token_id_list_given_length_range((seq_char_count, seq_char_count), token_ids)
  return seq, query


def generate_search_data(length_range, token_ids, query_seq_max_proportion=0.5):
  if random.uniform(0, 1) > 0.5:
    return generate_at_least_one_query_in_seq_data(length_range, token_ids, query_seq_max_proportion)
  else:
    return generate_no_query_in_seq_data(length_range, token_ids)
SAMPLING_FUNCTIONS.append(generate_search_data)
  

def generate_sort_data(length_range, token_ids):
    # - 1 because of <sep> token
    max_total_chars = length_range[1] - 1 
    # max_total_chars = seq chars + order chars 
    order_char_count = random.randint(int(length_range[0]/2), int(max_total_chars/2))
    order = random.choices(token_ids, k=order_char_count)
    seq_char_count = random.randint(order_char_count, max_total_chars - order_char_count)
    seq = _generate_deduplicate_data(None, token_ids, True, order, seq_char_count)
    return seq, order
SAMPLING_FUNCTIONS.append(generate_sort_data)


def _generate_replace_query_dic_given_str_list(seq, token_ids, num_replace):
    keys = random.sample(list(set(seq)), k=num_replace)
    values = _gen_rand_token_id_list_given_length(len(keys), token_ids)
    query = []
    for k, v in zip(keys, values):
      query.append(k)
      query.append(v)
    return query


def generate_replace_data(length_range, token_ids):
  # current data sampling: replaced key will for sure exist in seq. so need min_length of total input sequence > 3
  # min length possible input: k <sep> k v
  assert length_range[0] > 3  
  # - 3 because of <sep> key val
  min_seq_length = length_range[0] - 3
  max_seq_length = length_range[1] - 3

  seq_char_count = random.randint(min_seq_length, max_seq_length)
  seq = _gen_rand_token_id_list_given_length(seq_char_count, token_ids)
  query = _generate_replace_query_dic_given_str_list(seq, token_ids, 1)
  return seq, query
SAMPLING_FUNCTIONS.append(generate_replace_data)


def generate_replace_many_data(length_range, token_ids):
  # token_ids = list(token_ids)
  # - 1 because of <sep> token
  max_total_chars = length_range[1] - 1 
  min_total_chars = length_range[0] - 1 

  max_num_replace = int(max_total_chars / 3)
  min_num_replace = 2
  num_replace = random.randint(min_num_replace, max_num_replace)

  seq_char_count = random.randint(max(num_replace, min_total_chars-num_replace*2), max_total_chars - num_replace*2)

  min_unique_seq_chars = random.sample(token_ids, k=num_replace)
  seq = min_unique_seq_chars + random.choices(token_ids, k=seq_char_count-num_replace)
  random.shuffle(seq)
  query = _generate_replace_query_dic_given_str_list(seq, token_ids, num_replace)
  return seq, query
SAMPLING_FUNCTIONS.append(generate_replace_many_data)


def generate_set_op_data(length_range, token_ids):
  assert length_range[0] >= 3
  # - 1 to account for sep char
  max_total_chars = length_range[1] - 1 
  min_total_chars = length_range[0] - 1
  total_chars = random.randint(min_total_chars, max_total_chars)
  # seq1_char_count = random.randint(1, total_chars - 1)
  seq1_char_count = random.randint(0, total_chars)
  seq2_char_count = total_chars - seq1_char_count

  token_ids_sample = random.sample(token_ids, k=int((seq1_char_count + seq2_char_count)/2))

  seq1 = _gen_rand_token_id_list_given_length(seq1_char_count, token_ids_sample)
  seq2 = _gen_rand_token_id_list_given_length(seq2_char_count, token_ids_sample)
  return seq1, seq2
SAMPLING_FUNCTIONS.append(generate_set_op_data)


from lime_datagen.generate_data import NON_NUMERIC_SYMBOLS
LIME_EXTRA_IDS_USED = [str(x) for x in EXTRA_IDS[:len(NON_NUMERIC_SYMBOLS)]] 

BASIC_TASK_SAMPLING_ARGS = ['length_range', 'token_ids']
LIME_SAMPLING_ARGS = ['length_range', 'token_ids', 'is_original_vocab_division',
                      'ida_num_chars_range', 'ida_pattern_length_range', 
                      'num_upper_case_letters', 'num_lower_case_letters', 'num_math_symbols']
SUMMARIZATION_SAMPLING_ARGS = ['length_range', 
                              'char_set', 'vocab_size', 'num_chars_per_word', 
                              'mean_numsents', 'mean_sentlen']
MBPP_SAMPLING_ARGS = ['length_range', 'token_ids']
### util function for data generation ###
def generate_example(task, is_natural_language, **sampling_args):
  if is_natural_language:
    description = task.description
  else:
    description = task.name
  if 'lime' in task.name:
    assert all([arg in sampling_args for arg in LIME_SAMPLING_ARGS])
    input, output = task.sampling_fn(mode=task.name.split('_')[-1], 
                      **sampling_args)
    
    input = replace_string_lst1_words_with_lst2_words(input, NON_NUMERIC_SYMBOLS, LIME_EXTRA_IDS_USED)
    output  = replace_string_lst1_words_with_lst2_words(output, NON_NUMERIC_SYMBOLS, LIME_EXTRA_IDS_USED)

    input = input.split(' ')
    output = output.split(' ')
    input = [int(x) for x in input]
    output = [int(x) for x in output]
  elif 'summ' in task.name:
    assert all([arg in sampling_args for arg in SUMMARIZATION_SAMPLING_ARGS])
    input, output = task.sampling_fn(mode=task.name.split('_')[-1], **sampling_args)
  elif task.name in MBPP_TASKS:
    assert all([arg in sampling_args for arg in MBPP_SAMPLING_ARGS])
    input, output = gen_mbpp_data(task, **sampling_args)
    input = TOKENIZER.encode(description) + [TASK_NAME_INPUT_DIVIDER] + input
    input = list(input)
    assert type(input) == list
    input = [int(x) for x in input]
    if type(output) != list:
      assert type(output) == int
      output = [output]
    assert type(output) == list
    if len(output) == 0:
      output.append(ADD_TO_OUTPUT_IF_OUTPUT_EMPTY)
    output = [int(x) for x in output]

  else: # the first binary/unary tasks in the google doc
    assert all([arg in sampling_args for arg in BASIC_TASK_SAMPLING_ARGS])
    
    sampled_input = task.sampling_fn(**sampling_args)
    if not task.unary:
      input = sampled_input[0] + [ARG_DIVIDER] + sampled_input[1]
    else:
      input = sampled_input
    input_len = len(input)

    while input_len < sampling_args['length_range'][0] or input_len > sampling_args['length_range'][1]:
      # print("REJECTED")

      sampled_input = task.sampling_fn(**sampling_args)
      if not task.unary:
        input = sampled_input[0] + [ARG_DIVIDER] + sampled_input[1]
      else:
        input = sampled_input
      input_len = len(input)

    output = task.fn(sampled_input)
    # print('--')
    # print(input)
    # print(TOKENIZER.encode(description))
    input = TOKENIZER.encode(description) + [TASK_NAME_INPUT_DIVIDER] + input
    input = list(input)
    assert type(input) == list
    input = [int(x) for x in input]
    if type(output) != list:
      assert type(output) == int
      output = [output]
    assert type(output) == list
    if len(output) == 0:
      output.append(ADD_TO_OUTPUT_IF_OUTPUT_EMPTY)
    output = [int(x) for x in output]

  input = str(input)
  output = str(output)
  return input, output


def generate_batch_examples(task, num_examples, file_dir="./ulime_datasets/", is_natural_language=False, task_config_str="", **sampling_args):
  if not os.path.exists(osp.join(file_dir, task.name)):
    os.makedirs(osp.join(file_dir, task.name), exist_ok=True)
  file_name = "{}_{}M.txt".format(
      task_config_str, num_examples // 1_000_000)
  data_path = osp.join(file_dir, task.name, file_name)
  sampling_args['token_ids'] = tuple(sampling_args['token_ids'])
  with open(data_path, "w") as f:
    for count in range(num_examples):
      example = generate_example(task, is_natural_language, **sampling_args)
      f.write("\t".join(example)+"\n")
      if count % 10000 == 0:
        print(f'generated {task.name} {count}') 
  return data_path

### Basic unary Tasks ###

def copy(s):
  return s


def reverse(s):
  """
  Return the reverse of a string.
	Example: aaacddc -> cddcaaa
	"""

  return s[::-1]


def set_task(s):
  """
	Example: aabbbcbbbb -> abc
	"""
  char_set = set()
  new_s = []
  for i in s:
    if i in char_set:
      continue
    else:
      char_set.add(i)
      new_s += [i]
  return new_s

def _test_set_task():
  x = [2,2,2,2,3,3,4,4,4,4,5]
  y = set_task(x)
  assert y == [2,3,4,5]
  for _ in range(100):
    x = random.choices(list(range(6)),k=12)
    print(x)
    assert set(x) == set(set_task(x))


def duplicate(s):
  """
	Example: abdjw -> aabbddjjww
	"""
  result = []
  for t in s:
    result.append(t)
    result.append(t)
  return result


def deduplicate(input):
  """
	Example: aabbbcbbbb -> abcb
	"""
  dedup_input = []
  last = -999999
  for i in input:
    if i == last:
      continue
    else:
      last = i
      dedup_input.append(i)
  return dedup_input


def first_char(s):
  """
  Return the first char in a string.
	Example: aaacddc -> a
	"""
  return s[0]


def last_char(s):
  """
  Return the last char in a string.
	Example: aaacddc -> c
	"""
  return s[-1]


def length(s):
  """
  Return the length of a string.
	Example: cjvnac -> 6
	"""
  result = TOKENIZER.encode(str(len(s)))
  if result[0] == 3:
    result = result[1:]
  return result


def longest_word(s):
  """
  Return the longest word in a string.
	Example: cjvnac asd aa -> cjvnac
	"""
  space = WORD_DIVIDER
  curr_word_length = 0
  max_length_word_list = []
  curr_word_list = []
  for char in s:
    if char != space:
      curr_word_list.append(char)
      curr_word_length += 1
      if curr_word_length > len(max_length_word_list):
        max_length_word_list = curr_word_list
    else:
      curr_word_list = []
      curr_word_length = 0
  return max_length_word_list


TASK_REGISTRY['copy'] = Task(
  name='copy',
  description='Copy the following string: ',
  sampling_fn=gen_rand_token_id_list_given_length_range,
  fn=copy,
  unary=True)


def gen_reverse_data(length_range, token_ids):
  # candidate = gen_rand_token_id_list_given_length_range(length_range, token_ids)
  # reversed_candidate = reverse(candidate)
  # while reverse(candidate) != TOKENIZER.encode(TOKENIZER.decode(reversed_candidate)):
  #   candidate = gen_rand_token_id_list_given_length_range(length_range, token_ids)
  #   reversed_candidate = reverse(candidate)
  return gen_rand_token_id_list_given_length_range(length_range, token_ids)

TASK_REGISTRY['reverse'] = Task(
  name='reverse',
  description='Reverse the following string: ',
  sampling_fn=gen_reverse_data,
  fn=reverse,
  unary=True)

TASK_REGISTRY['set'] = Task(
  name='set',
  description='Extract the set of chars used in the following string: ',
  sampling_fn=generate_set_data,
  fn=set_task,
  unary=True)

TASK_REGISTRY['first_char'] = Task(
  name='first_char',
  description='Extract the first char used in the following string: ',
  sampling_fn=gen_rand_token_id_list_given_length_range,
  fn=first_char,
  unary=True)

TASK_REGISTRY['last_char'] = Task(
  name='last_char',
  description='Extract the last char used in the following string: ',
  sampling_fn=gen_rand_token_id_list_given_length_range,
  fn=last_char,
  unary=True)

TASK_REGISTRY['deduplicate'] = Task(
  name='deduplicate',
  description='Replace substrings of the same chars with one char in the following string: ',
  sampling_fn=generate_deduplicate_data,
  fn=deduplicate,
  unary=True)

TASK_REGISTRY['length'] = Task(
  name='length',
  description='Return the length of the following string: ',
  sampling_fn=gen_rand_token_id_list_given_length_range,
  fn=length,
  unary=True)

TASK_REGISTRY['longest_word'] = Task(
  name='longest_word',
  description='Return the longest word in the following string: ',
  sampling_fn=generate_longest_word_data,
  fn=longest_word,
  unary=True)

TASK_REGISTRY['duplicate'] = Task(
  name='duplicate',
  description='Duplicate each char in the following string: ',
  sampling_fn=gen_rand_token_id_list_given_length_range,
  fn=duplicate,
  unary=True)


### Basic binary functions ###

def count(inputs):
  seq, query = inputs
  query = query[0]
  c = 0
  for e in seq:
    if e == query:
      c += 1
  c = str(c)  
  c = TOKENIZER.encode(c)
  if c[0] == 3:
    c = c[1:]
  return c


def convert_int_list_to_space_sep_str(int_list):
  # [1,2,3] -> '1 2 3'
  l = [str(i) for i in int_list]
  return ' '.join(l)

def convert_space_sep_str_to_int_list(s):
  # [1,2,3] -> '1 2 3'
  l = s.split(' ')
  return [int(i) for i in l]


def delete(inputs):
  seq, query = inputs
  idx = _get_index_return_int(inputs)
  if idx == -1:
    return seq
  else:
    return seq[:idx] + seq[idx+len(query):]


def filt(inputs):
  seq, query = inputs
  one_del_seq = delete(inputs)
  if seq == one_del_seq:
    return seq
  else:
    return filt((one_del_seq, query))


def search(inputs):
  idx = _get_index_return_int(inputs)
  if idx != -1:
    return TOKENIZER.encode('yes')
  else:
    return TOKENIZER.encode('no')


def _get_index_return_int(inputs):
  seq, query = inputs
  for i in range(len(seq) - len(query) + 1):
    if seq[i:i+len(query)] == query:
      return i  
  return -1


def get_index(inputs):
  c = _get_index_return_int(inputs)
  c = str(c)  
  c = TOKENIZER.encode(c)
  if c[0] == 3:
    c = c[1:]
  return c


def sort(inputs):
  seq, query = inputs
  char_order_dic = {char: order for order, char in enumerate(query)}
  seq_list = sorted(seq, key=lambda char: char_order_dic[char])
  return seq_list


def replace_many(inputs):
  seq, query = inputs

  replace_dic = {}
  for i in range(0, len(query), 2):
    replace_dic[query[i]] = query[i+1]
  result = []
  for char in seq:
    if char in replace_dic:
      result.append(replace_dic[char])
    else:
      result.append(char)
  return result


def replace(inputs):
  return replace_many(inputs)


def union(inputs):
  seq1, seq2 = inputs
  seq1_set = set(seq1)
  seq2_set = set(seq2)
  result_set = seq1_set.union(seq2_set)
  return list(result_set)


def intersect(inputs):
  seq1, seq2 = inputs
  seq1_set = set(seq1)
  seq2_set = set(seq2)
  result_set = seq1_set.intersection(seq2_set)
  return list(result_set)


def set_1_minus_2(inputs):
  seq1, seq2 = inputs
  seq1_set = set(seq1)
  seq2_set = set(seq2)
  result_set = seq1_set - seq2_set
  return list(result_set)


def set_2_minus_1(inputs):
  seq1, seq2 = inputs
  seq1_set = set(seq1)
  seq2_set = set(seq2)
  result_set = seq2_set - seq1_set
  return list(result_set)


TASK_REGISTRY['count'] = Task(
  name='count',
  description='Count the char used in the following string: ',
  sampling_fn=generate_count_data,
  fn=count,
  unary=False)

TASK_REGISTRY['delete'] = Task(
  name='delete',
  description='Delete first appearance of a query string in the string: ',
  sampling_fn=generate_delete_data,
  fn=delete,
  unary=False)

TASK_REGISTRY['filter'] = Task(
  name='filter',
  description='Delete all appearances of a query string in the string: ',
  sampling_fn=generate_filter_data,
  fn=filt,
  unary=False)

TASK_REGISTRY['get_index'] = Task(
  name='get_index',
  description='Get index of first appearance of a query string in the string: ',
  sampling_fn=generate_get_index_data,
  fn=get_index,
  unary=False)

TASK_REGISTRY['search'] = Task(
  name='search',
  description='Return \'yes\' if query string is in string else \'no\': ',
  sampling_fn=generate_search_data,
  fn=search,
  unary=False)

TASK_REGISTRY['sort'] = Task(
  name='sort',
  description='Return seq sorted based on order of elements in query: ',
  sampling_fn=generate_sort_data,
  fn=sort,
  unary=False)

TASK_REGISTRY['replace'] = Task(
  name='replace',
  description='Return seq with one element value replaced according to query: ',
  sampling_fn=generate_replace_data,
  fn=replace,
  unary=False)

TASK_REGISTRY['replace_many'] = Task(
  name='replace_many',
  description='Return seq with many element values replaced according to query: ',
  sampling_fn=generate_replace_many_data,
  fn=replace_many,
  unary=False)

TASK_REGISTRY['union'] = Task(
  name='union',
  description='Return set(seq1) union set(seq2): ',
  sampling_fn=generate_set_op_data,
  fn=union,
  unary=False)

TASK_REGISTRY['intersect'] = Task(
  name='intersect',
  description='Return set(seq1) intersect set(seq2): ',
  sampling_fn=generate_set_op_data,
  fn=intersect,
  unary=False)

TASK_REGISTRY['set_1_minus_2'] = Task(
  name='set_1_minus_2',
  description='Return set(seq1) - set(seq2): ',
  sampling_fn=generate_set_op_data,
  fn=set_1_minus_2,
  unary=False)

TASK_REGISTRY['set_2_minus_1'] = Task(
  name='set_2_minus_1',
  description='Return set(seq2) - set(seq1): ',
  sampling_fn=generate_set_op_data,
  fn=set_2_minus_1,
  unary=False)


## LIME ### 

from lime_datagen.generate_data import gen_one_lime_data

TASK_REGISTRY['lime_induct'] = Task(
  name='lime_induct',
  description='LIME induction task',
  sampling_fn=gen_one_lime_data,
  fn=None,
  unary=None)


TASK_REGISTRY['lime_deduct'] = Task(
  name='lime_deduct',
  description='LIME deduction task',
  sampling_fn=gen_one_lime_data,
  fn=None,
  unary=None)

TASK_REGISTRY['lime_abduct'] = Task(
  name='lime_abduct',
  description='LIME abduction task',
  sampling_fn=gen_one_lime_data,
  fn=None,
  unary=None)


### Summarization tasks ###
SUMMARIZATION_TASKS = ['summ_CopyKeywordOneSentence',
                        'summ_CopyKeywordMultipleSentences',
                        'summ_CopyKeywordMultipleSentencesShuffled',
                        'summ_CopyKeywordMultipleSentencesSorted',
                        'summ_CopyQuoted',
                        'summ_CopyBulleted',
                        'summ_ClassifyKeyword',
                        'summ_ReplaceClassKeyword',
                        'summ_MajorityKeyword',
                        'summ_TopicSegregation',
                        'summ_ThresholdNumber',
                        'summ_LargestNumber',
                        'summ_ParaphraseWords',
                        'summ_JoinClauses',
                        'summ_BreakClauses',
                        'summ_TruncateSentence']
from summarization_tasks_datagen.ourtasks import gen_one_summ_data
for task in SUMMARIZATION_TASKS:
  TASK_REGISTRY[task] = Task(
    name=task,
    description=task,
    sampling_fn=gen_one_summ_data,
    fn=None,
    unary=None)


def _replace_string(string, replacement_dic):
  for k, v in replacement_dic.items():
    string = string.replace(k, v)
  return string
rsrs = _replace_string


_replacement_dic_merge_dictionaries_three = {'{': '', 
                   '}':'',
                   '(':'',
                   '(': 'WORD_START ',
                   ',):':' COLON ', '):':' COLON ', ')':'', ',':'', '  ':' ', '   ':' ',
                   'WORD_START': str(WORD_START),
                   'COLON': str(COLON),
                    'DIC_SEP': str(DIC_SEP)}

def convert_3_dic_to_token_data(d1, d2, d3):
  input_str = (str(d1) + ' DIC_SEP ' + str(d2) + ' DIC_SEP ' + str(d3))
  # print(input_str)
  return _replace_string(input_str, _replacement_dic_merge_dictionaries_three).split(' ')

def convert_dic_to_token_data(d1):
  input_str = str(d1) 
  return _replace_string(input_str, _replacement_dic_merge_dictionaries_three).split(' ')

### MBPP tasks ###

# MBPP_TASKS = ['find_rotations', 'remove_fl_occ', 'count_common', 
#   'split_lowerstring', 'rearrange_string', 'merge_dictionaries_three']
MBPP_TASKS = ['remove_fl_occ', 'count_common', 'rearrange_string', 'merge_dictionaries_three']

def gen_mbpp_data(task, length_range, token_ids):
  if length_range[0] == 0:
    length_range = (1, length_range[1])
  if task.name in ['find_rotations', 'split_lowerstring', 'rearrange_string']:
    if task.name == 'split_lowerstring' or task.name == 'find_rotations':
      raise NotImplementedError
    input_data = gen_rearrange_string_data(length_range, token_ids)
    output_data = task.fn(input_data)
  elif task.name == 'merge_dictionaries_three':
    d1, d2, d3 = gen_mbpp_arg_3dic(length_range, token_ids)
    input_data = convert_3_dic_to_token_data(d1, d2, d3)
    while len(input_data) < length_range[0] or len(input_data) > length_range[1]:
      # print("REGEN MERGE DIC 333")
      d1, d2, d3 = gen_mbpp_arg_3dic(length_range, token_ids)
      input_data = convert_3_dic_to_token_data(d1, d2, d3)
    output = task.fn(d1, d2, d3)
    output_data = convert_dic_to_token_data(output)
  elif task.name == 'remove_fl_occ':
    s, c  = gen_remove_fl_occ_data(length_range, token_ids)
    input_data = s + [ARG_DIVIDER] + [c]
    output_data = task.fn(s, c)
  elif task.name == 'count_common':
    words = gen_mbpp_arg_words(task.name, length_range, token_ids)
    input_data = convert_mbpp_words_to_token_data(words)
    while len(input_data) < length_range[0] or len(input_data) > length_range[1]:
      words = gen_mbpp_arg_words(task.name, length_range, token_ids)
      input_data = convert_mbpp_words_to_token_data(words)
    output = task.fn(words)
    output_data = convert_dic_to_token_data(output)
  else:
    raise NotImplementedError
  return input_data, output_data


import string

grtidlgl = _gen_rand_token_id_list_given_length

def gen_rearrange_string_data(length_range, token_ids):
  length = random.randint(length_range[0], length_range[1])
  token_ids_sample_count = random.randint(1, int(length / 2))
  token_ids_sample = random.sample(token_ids, k=token_ids_sample_count)
  return _gen_rand_token_id_list_given_length(length, token_ids_sample)

# def gen_mbpp_arg_str(task, length_range, char_set):
#   if task.name == 'split_lowerstring':
#     # check there is lowercase in charset
#     lowercase_letters = set([x for x in string.ascii_lowercase])
#     if len(char_set.union(lowercase_letters)) == 0:
#       raise RuntimeError("must provide lowercase letters in char_set for split_lowerstring task")
#   str_len = random.randint(*length_range)
#   return ''.join(random.choices(list(char_set), k=str_len))

def gen_remove_fl_occ_data(length_range, token_ids):
  length = random.randint(length_range[0], length_range[1]-2)
  seq = _gen_rand_token_id_list_given_length(length, token_ids)
  query = random.choice(seq)
  return seq, query


_mbpp_words_to_token_data_replacement_dic = {'(':'',
         '),':' WORD_DIVIDER',
         ')':'',
         '  ':' ',
         '   ':' ',
         ',':'', 'WORD_DIVIDER':str(WORD_DIVIDER), '[':'', ']':''}
def convert_mbpp_words_to_token_data(words):
  return _replace_string(str(words), _mbpp_words_to_token_data_replacement_dic).split(' ')

def gen_mbpp_arg_words(task_name, length_range, token_ids):
  if task_name == 'count_common':
    max_non_comma_chars = length_range[1] - int(length_range[1] / 5)
    non_comma_chars = random.randint(1, max_non_comma_chars)

    num_unique_words = random.randint(1, max(int(non_comma_chars/3),1))
    num_max_total_chars_each_word = _random_partition_no_zeros(non_comma_chars, num_unique_words)
    num_occurences_each_word = [random.randint(1,max(int(num/5),1)) for num in num_max_total_chars_each_word]
    length_each_word = [int(x/y) for x,y in zip(num_max_total_chars_each_word, num_occurences_each_word)]
    words = []
    for length, num_occurences in zip(length_each_word, num_occurences_each_word):
      words += [tuple(random.choices(token_ids, k=length))]*num_occurences
    random.shuffle(words)
    return words
  else:
    raise NotImplementedError()


def gen_mbpp_arg_3dic(length_range, token_ids):
  non_punctuation_chars = random.randint(6, max(int(length_range[1] * 3 / 4),6))
  num_unique_words = random.randint(6, max(int(non_punctuation_chars/3),6))
  num_max_total_chars_each_word = _random_partition_no_zeros(non_punctuation_chars, num_unique_words)
  num_occurences_each_word = [random.randint(1,num) for num in num_max_total_chars_each_word]
  length_each_word = [int(x/y) for x,y in zip(num_max_total_chars_each_word, num_occurences_each_word)]
  words = []
  dics = [{}, {}, {}]
  for length, num_occurences in zip(length_each_word, num_occurences_each_word):
    words += [tuple(random.choices(token_ids, k=length))]*num_occurences
  if len(words) % 2 == 1:
    words = words[:-1]
  keys = words[:int(len(words)/2)]
  values = words[int(len(words)/2):]
  random.shuffle(values)
  dics[0][keys[0]] = values[-1]
  dics[1][keys[1]] = values[-2]
  dics[2][keys[2]] = values[-3]
  for k, v in zip(keys, values):
    which_dic = random.randint(0,2)
    dics[which_dic][k] = v
  random.shuffle(dics)
  return dics[0], dics[1], dics[2]


def find_rotations(str): 
    tmp = str + str
    n = len(str) 
    for i in range(1,n + 1): 
        substring = tmp[i: i+n] 
        if (str == substring): 
            return i 
    return n 

  
def remove_fl_occ(s,ch): 
    for i in range(len(s)): 
        if (s[i] == ch): 
            s = s[0 : i] + s[i + 1:] 
            break
    for i in range(len(s) - 1,-1,-1):  
        if (s[i] == ch): 
            s = s[0 : i] + s[i + 1:] 
            break
    return s 


from collections import Counter
def count_common(words):
  word_counts = Counter(words)
  top_four = word_counts.most_common(4)
  return dict(top_four)


import collections as ct
def merge_dictionaries_three(dict1, dict2, dict3):
    merged_dict = dict(ct.ChainMap({},dict1,dict2,dict3))
    return merged_dict

import heapq
from collections import Counter
def rearrange_string(S):
    ctr = Counter(S)
    heap = [(-value, key) for key, value in ctr.items()]
    heapq.heapify(heap)
    if (-heap[0][0]) * 2 > len(S) + 1: 
        return []
    ans = []
    while len(heap) >= 2:
        nct1, char1 = heapq.heappop(heap)
        nct2, char2 = heapq.heappop(heap)
        ans.extend([char1, char2])
        if nct1 + 1: heapq.heappush(heap, (nct1 + 1, char1))
        if nct2 + 1: heapq.heappush(heap, (nct2 + 1, char2))
    return ans + ([heap[0][1]] if heap else [])

import re
def split_lowerstring(text):
 return (re.findall('[a-z][^a-z]*', text))


for task in MBPP_TASKS:
  TASK_REGISTRY[task] = Task(
    name=task,
    description=task,
    sampling_fn=gen_mbpp_data,
    fn=eval(task),
    unary=None)
