# Supplementary material
Source: ML conference proceedings conference paper supplement (https://proceedings.neurips.cc/paper_files/paper/2022/hash/89379d5fc6eb34ff98488202fb52b9d0-Abstract.html)
Supplement: Supplementary file 1 [file 89379d5fc6eb34ff98488202fb52b9d0-Supplemental-Conference.zip › supplementary_material/code/simpler_tasks_data_gen/unary_tokens_examples.ipynb]

# %% [code]
T.decode([13736])

# %% [code]
T.unk_id()

# %% [code]
T.id_to_piece(3)

# %% [code]
T.decode([3,11190])

# %% [code]
!pip install jsonlines

# %% [code]
%load_ext autoreload
%reload_ext autoreload
%autoreload 2
from IPython.core.display import display, HTML
display(HTML("<style>.container { width:100% !important; }</style>"))
import json
import pandas as pd
import numpy as np
from tasks_with_tokens import *


tids = tuple(T5_TOKEN_IDS_FOR_TASKS)
def show_sample_examples(func, num_examples=10, length_range=(10, 20), token_ids=tids):
    for _ in range(num_examples):
        print(func(length_range=length_range, char_set=char_set))
        
UNARY_BASIC_TASKS = ['copy', 'reverse', 'set', 'first_char', 'last_char', 'deduplicate', 'length', 
       'longest_word', 'duplicate']

# UNARY_BASIC_TASKS = ['length']
T = TOKENIZER

def show_task_examples(task, is_natural_language=False, num_examples=20, is_print=True):
    for count in range(num_examples):
        basic_task_sampling_args = {'length_range': (10,30), 'token_ids':tids[:200]}
        example = generate_example(TASK_REGISTRY[task], is_natural_language=is_natural_language, **basic_task_sampling_args)
        if count % 1000==0:
            print(count)
        if is_print:
            print("-----")
            if task == 'longest_word':
                print(f'@input = {example[0]}')
                print(f'output = {example[1]}')
            else:
                print(example)
#             print(f"input token IDs {T.encode(example[0])}")
            print(f"input decoded: {T.decode(eval(example[0]))}")

            print(f"output decoded: {T.decode(eval(example[1]))}")

#             if len(example[1]) == 0 or example[1].isspace():
#                 print(example[1])
#                 raise RuntimeError()

# %% [code]
for task in UNARY_BASIC_TASKS:
    print(f'\n{task}')
    show_task_examples(task, num_examples=5, is_print=True)

# %% [code]
BINARY_BASIC_TASKS = ['count', 'delete', 'filter', 
       'get_index', 'search', 'sort', 
          'replace', 'replace_many', 'union', 'intersect', 'set_1_minus_2', 'set_2_minus_1']


for task in BINARY_BASIC_TASKS:
    print(f'\n{task}')
    show_task_examples(task, num_examples=5, is_print=True)

# %% [code]
[1,2,2,3].index([2,2])

# %% [code]
'a'.split(', ')

# %% [markdown]
('last_char <extra_id_0> assessmentten Alonglapse', 'lapse')
input token IDs [336, 834, 4059, 32099, 4193, 324, 8529, 16543]
output token IDs [3, 16543]

# %% [code]
T.id_to_piece(3)

# %% [code]
x = generate_set_data((4,20), TASKS_TOKEN_IDS)
print(x)

# %% [code]
print(TOKENIZER.encode(TOKENIZER.decode(x)))

# %% [code]
